# Supplementary material
Source: publisher figshare collection journal article supplement (https://diabetesjournals.figshare.com/ndownloader/files/34100963)
Supplement: Supplementary file 1 [file 34100963]

## Sheet: Proteins
Protein FDR Confidence	Master	Accession	Description	Contaminant	Exp. q-value	Sum PEP Score	Coverage	# Peptides	# PSMs	# Unique Peptides	# Protein Groups	# AAs	MW [kDa]	calc. pI	Found in Sample: [S1] F1: 126, Sample	Found in Sample: [S2] F1: 127N, Sample	Found in Sample: [S3] F1: 127C, Sample	Found in Sample: [S4] F1: 128N, Sample	Found in Sample: [S5] F1: 128C, Control	Found in Sample: [S6] F1: 129N, Sample	Found in Sample: [S7] F1: 129C, Sample	Found in Sample: [S8] F1: 130N, Sample	Found in Sample: [S9] F1: 130C, Sample	Found in Sample: [S10] F1: 131, Sample	Modifications	Entrez Gene ID	Ensembl Gene ID	Gene ID	Chromosome	Biological Process	Cellular Component	Molecular Function	Pfam IDs	Abundance Ratio: (F1, 126) / (F1, 128C)	Abundance Ratio: (F1, 127N) / (F1, 128C)	Abundance Ratio: (F1, 127C) / (F1, 128C)	Abundance Ratio: (F1, 128N) / (F1, 128C)	Abundance Ratio: (F1, 129N) / (F1, 128C)	Abundance Ratio: (F1, 129C) / (F1, 128C)	Abundance Ratio: (F1, 130N) / (F1, 128C)	Abundance Ratio: (F1, 130C) / (F1, 128C)	Abundance Ratio: (F1, 131) / (F1, 128C)	Abundance: F1: 126, Sample	Abundance: F1: 127N, Sample	Abundance: F1: 127C, Sample	Abundance: F1: 128N, Sample	Abundance: F1: 128C, Control	Abundance: F1: 129N, Sample	Abundance: F1: 129C, Sample
High	Master Protein	E9Q9C6	Protein Fcgbp OS=Mus musculus GN=Fcgbp PE=2 SV=1	FALSE	0	449.345	25.0097	46	457	46	1	2583	275.058	5.03	High	High	High	High	High	High	High	High	High	High		215384	ENSMUSG00000047730	Fcgbp	7			protein binding	Pf00094, Pf01826, Pf08742, Pf12714	0.282	0.549	0.399	0.794	1.163	0.915	1.044	2.063	1.537	37650000	73260000	53230000	106000000	133500000	155300000	122100000
Checked	Confidence	Annotated Sequence	Modifications	Modifications in Master Proteins	Contaminant	Qvality PEP	Qvality q-value	# Protein Groups	# Proteins	# PSMs	Master Protein Accessions	Positions in Master Proteins	# Missed Cleavages	Theo. MH+ [Da]	Found in Sample: [S1] F1: 126, Sample	Found in Sample: [S2] F1: 127N, Sample	Found in Sample: [S3] F1: 127C, Sample	Found in Sample: [S4] F1: 128N, Sample	Found in Sample: [S5] F1: 128C, Control	Found in Sample: [S6] F1: 129N, Sample	Found in Sample: [S7] F1: 129C, Sample	Found in Sample: [S8] F1: 130N, Sample	Found in Sample: [S9] F1: 130C, Sample	Found in Sample: [S10] F1: 131, Sample	Abundance Ratio: (F1, 126) / (F1, 128C)	Abundance Ratio: (F1, 127N) / (F1, 128C)	Abundance Ratio: (F1, 127C) / (F1, 128C)	Abundance Ratio: (F1, 128N) / (F1, 128C)	Abundance Ratio: (F1, 129N) / (F1, 128C)	Abundance Ratio: (F1, 129C) / (F1, 128C)	Abundance Ratio: (F1, 130N) / (F1, 128C)	Abundance Ratio: (F1, 130C) / (F1, 128C)	Abundance Ratio: (F1, 131) / (F1, 128C)	Abundance: F1: 126, Sample	Abundance: F1: 127N, Sample	Abundance: F1: 127C, Sample	Abundance: F1: 128N, Sample	Abundance: F1: 128C, Control	Abundance: F1: 129N, Sample	Abundance: F1: 129C, Sample	Abundance: F1: 130N, Sample	Abundance: F1: 130C, Sample	Abundance: F1: 131, Sample	Abundances Count: F1: 126, Sample	Abundances Count: F1: 127N, Sample	Abundances Count: F1: 127C, Sample	Abundances Count: F1: 128N, Sample	Abundances Count: F1: 128C, Control	Abundances Count: F1: 129N, Sample
FALSE	High	[K].GCVLDVCLGGGSK.[D]	2xTMT6plex [N-Term; K13]; 2xCarbamidomethyl [C2; C7]		FALSE	4.32956e-05	0	1	2	13	E9Q9C6	E9Q9C6 [1484-1496]	0	1779.95	High	High	High	High	High	High	High	High	High	High	0.22	0.497	0.318	0.821	1.131	1.105	0.698	2.261	1.822	1642000	3705000	2370000	6116000	7450000	8427000	8232000	5201000	16840000	13580000	10	10	10	10	10	10
FALSE	High	[R].VSQHGSDVVIETDFGLR.[V]	1xTMT6plex [N-Term]		FALSE	7.34867e-07	0	1	2	24	E9Q9C6	E9Q9C6 [933-949]	0	2088.09	High	High	High	High	High	High	High	High	High	High	0.583	0.736	0.678	0.795	1.217	1.095	1.338	1.877	1.782	1895000	2391000	2203000	2582000	3249000	3953000	3559000	4349000	6099000	5790000	19	19	19	19	19	19
FALSE	High	[K].YHGEQFCGLLTSPTGPLAACHK.[L]	2xTMT6plex [N-Term; K22]; 2xCarbamidomethyl [C7; C20]		FALSE	6.34646e-06	0	1	2	3	E9Q9C6	E9Q9C6 [1035-1056]	0	2902.47	High	High	High	High	High	High	High	High	High	High	0.631	1.054	0.913	2.05	1.834	1.143	2.369	1.787	2.344	92610	154700	134100	301000	146800	269300	167900	347900	262300	344100	2	2	2	2	2	2
FALSE	High	[K].YHGEQFCGLLTSPTGPLAACHK.[L]	2xTMT6plex [N-Term; K22]; 1xDeamidated [Q5]; 2xCarbamidomethyl [C7; C20]		FALSE	0.00103847	0	1	2	1	E9Q9C6	E9Q9C6 [1035-1056]	0	2903.46	High	High	High	High	High	High	High	High	High	High	0.455	0.822	0.868	1.389	1.399	0.975	2.015	1.557	1.707	44320	80020	84500	135300	97400	136300	94920	196300	151700	166200	1	1	1	1	1	1
FALSE	High	[K].ECGILADPEGPFR.[E]	1xTMT6plex [N-Term]; 1xCarbamidomethyl [C2]		FALSE	0.00412924	0	1	2	8	E9Q9C6	E9Q9C6 [648-660]	0	1689.85	High	High	High	High	High	High	High	High	High	High	0.582	0.74	0.386	0.847	1.134	0.808	1.013	2.23	1.256	838700	1065000	555100	1219000	1440000	1633000	1163000	1459000	3211000	1808000	7	7	7	7	7	7
FALSE	High	[R].VDVTLPSSYHGAVCGLCGNMDK.[N]	2xTMT6plex [N-Term; K22]; 2xCarbamidomethyl [C14; C17]		FALSE	5.0889e-06	0	1	2	9	E9Q9C6	E9Q9C6 [1379-1400]	0	2838.4	High	High	High	High	High	High	High	High	High	High	0.304	0.57	0.683	1.928	1.471	1.45	1.374	3.901	1.299	220200	412400	494600	1396000	724100	1065000	1050000	995100	2825000	940800	7	7	7	7	7	7
FALSE	High	[R].VDVTLPSSYHGAVCGLCGNMDK.[N]	2xTMT6plex [N-Term; K22]; 2xCarbamidomethyl [C14; C17]; 1xOxidation [M20]		FALSE	5.60541e-05	0	1	2	6	E9Q9C6	E9Q9C6 [1379-1400]	0	2854.39	High	High	High	High	High	High	High	High	High	High	0.4	0.58	0.546	1.581	1.344	1.132	0.784	3.479	1.202	48400	70210	66110	191600	121100	162800	137100	94980	421500	145600	2	2	2	2	2	2
FALSE	High	[K].LQVNGEFVALPFHLDQK.[L]	2xTMT6plex [N-Term; K17]; 1xDeamidated [N4]		FALSE	1.00261e-06	0	1	2	11	E9Q9C6	E9Q9C6 [1731-1747]	0	2414.35	High	High	High	High	High	High	High	High	High	High	0.126	0.171	0.311	0.741	1.128	1.412	0.834	3.769	2.245	143100	195100	354000	845100	1140000	1286000	1609000	950300	4296000	2559000	5	5	6	6	6	6
FALSE	High	[K].LQVNGEFVALPFHLDQK.[L]	2xTMT6plex [N-Term; K17]		FALSE	1.54673e-05	0	1	2	5	E9Q9C6	E9Q9C6 [1731-1747]	0	2413.36	High	High	High	High	High	High	High	High	High	High	0.121	0.256	0.228	0.439	1.104	0.743	0.834	2.776	1.816	18270	38850	34610	66520	151500	167300	112600	126400	420600	275100	1	1	1	1	1	1
FALSE	High	[R].IENGVQACHPTGCGHCLANGGLHYVTLDGR.[V]	1xTMT6plex [N-Term]; 3xDeamidated [N3; Q6; N19]; 3xCarbamidomethyl [C8; C13; C16]		FALSE	0.00188258	0	1	2	1	E9Q9C6	E9Q9C6 [2019-2048]	0	3495.6	High	High	High	High	High	High	High	High	High	High
FALSE	High	[R].IENGVQACHPTGCGHCLANGGLHYVTLDGR.[V]	1xTMT6plex [N-Term]; 2xDeamidated [N3; N19]; 3xCarbamidomethyl [C8; C13; C16]		FALSE	6.02246e-06	0	1	2	3	E9Q9C6	E9Q9C6 [2019-2048]	0	3494.62	High	High	High	High	High	High	High	High	High	High	1.079	1.098	2.206	4.194	1.506	0.777	1.248	1.318	1.4	66880	68080	136800	260000	62000	93370	48160	77360	81710	86840	2	2	2	2	2	2
FALSE	High	[K].NPNDDLTAVGGKPEGWK.[V]	3xTMT6plex [N-Term; K12; K17]		FALSE	1.16454e-06	0	1	3	24	E9Q9C6	E9Q9C6 [1797-1813]	0	2485.37	High	High	High	High	High	High	High	High	High	High	0.148	0.399	0.165	0.47	1.126	0.745	0.961	2.491	1.791	1399000	3772000	1560000	4443000	9457000	10650000	7049000	9089000	23560000	16940000	16	16	16	16	16	16
FALSE	High	[K].KECGILADPEGPFR.[E]	2xTMT6plex [N-Term; K1]; 1xCarbamidomethyl [C3]		FALSE	0.000326744	0	1	2	8	E9Q9C6	E9Q9C6 [647-660]	1	2047.1	High	High	High	High	High	High	High	High	High	High	0.524	0.801	0.917	3.225	1.366	1.694	1.019	3.154	1.517	1415000	2163000	2475000	8703000	2699000	3687000	4571000	2750000	8513000	4094000	5	5	5	5	5	5
FALSE	High	[R].YYVLGATFYPGPECER.[L]	1xTMT6plex [N-Term]; 1xCarbamidomethyl [C14]		FALSE	2.72192e-05	0	1	2	12	E9Q9C6	E9Q9C6 [1978-1993]	0	2151.04	High	High	High	High	High	High	High	High	High	High	0.563	2.399	0.413	0.792	1.03	0.963	0.679	3.219	1.685	997500	4247000	732100	1402000	1771000	1823000	1706000	1202000	5701000	2984000	8	8	8	8	8	8
FALSE	High	[K].DVCGLCGNFNGNPDDDLALK.[G]	2xTMT6plex [N-Term; K20]; 2xCarbamidomethyl [C3; C6]		FALSE	2.04801e-05	0	1	2	5	E9Q9C6	E9Q9C6 [582-601]	0	2652.28	High	High	High	High	High	High	High	High	High	High	0.245	0.435	0.383	1.006	1.58	0.767	0.959	2.546	1.437	131400	233500	205400	539800	536700	847800	411600	514500	1367000	771100	4	4	4	4	4	4
FALSE	High	[K].DVCGLCGNFNGNPDDDLALK.[G]	2xTMT6plex [N-Term; K20]; 1xDeamidated [N10]; 2xCarbamidomethyl [C3; C6]		FALSE	5.80121e-06	0	1	2	7	E9Q9C6	E9Q9C6 [582-601]	0	2653.26	High	High	High	High	High	High	High	High	High	High	0.276	0.552	0.456	1.377	1.373	0.789	0.765	2.576	1.311	233200	466000	384500	1162000	844200	1159000	666300	645400	2174000	1107000	5	5	5	5	5	5
FALSE	High	[K].DVCGLCGNFNGNPDDDLALK.[G]	2xTMT6plex [N-Term; K20]; 2xDeamidated [N10; N]; 2xCarbamidomethyl [C3; C6]		FALSE	8.42932e-05	0	1	2	2	E9Q9C6	E9Q9C6 [582-601]	0	2654.25	High	High	High	High	High	High	High	High	High	High	0.113	0.358	0.278	1.223	1.298	0.776	0.588	2.756	1.325	13280	42250	32770	144300	118000	153100	91560	69320	325100	156300	1	1	1	1	1	1
FALSE	High	[K].VNGVDTKLPVMLDGGK.[I]	3xTMT6plex [N-Term; K7; K16]; 1xDeamidated [N2]		FALSE	0.00283038	0	1	2	1	E9Q9C6	E9Q9C6 [915-930]	1	2331.36	High	High	High	High	High	High	High	High	High	High	1.204	2.522	1.073	4.1	1.603	1.469	1.182	1.487	1.438	163800	343300	146000	558100	136100	218200	199900	160900	202400	195800	1	1	1	1	1	1
FALSE	High	[R].VVVTVAGQVVGLAR.[G]	1xTMT6plex [N-Term]		FALSE	0.0045848	0	1	2	1	E9Q9C6	E9Q9C6 [2088-2101]	0	1597	High	High	High	High	High	High	High	High	High	High	1.146	1.538	1.415	1.703	1.063	1.316	1.005	1.965	1.236	136700	183400	168700	203100	119200	126700	156900	119800	234300	147300	1	1	1	1	1	1
FALSE	High	[R].KLQVNGEFVALPFHLDQK.[L]	3xTMT6plex [N-Term; K1; K18]; 2xDeamidated [Q3; N5]		FALSE	0.00247377	0	1	2	2	E9Q9C6	E9Q9C6 [1730-1747]	1	2772.59	High	High	High	High	High	High	High	High	High	High	0.356	0.518	0.489	0.901	1.135	1.022	0.77	1.914	1.351	61430	89350	84400	155400	172500	195800	176300	132900	330200	233100	2	2	2	2	2	2
FALSE	High	[R].KLQVNGEFVALPFHLDQK.[L]	3xTMT6plex [N-Term; K1; K18]; 1xDeamidated [Q/N]		FALSE	3.12825e-06	0	1	2	27	E9Q9C6	E9Q9C6 [1730-1747]	1	2771.61	High	High	High	High	High	High	High	High	High	High	0.121	0.149	0.255	0.698	0.885	1.021	0.685	2.208	1.407	434900	536500	916200	2512000	3599000	3187000	3675000	2466000	7947000	5065000	8	8	8	8	8	8
FALSE	High	[R].KLQVNGEFVALPFHLDQK.[L]	3xTMT6plex [N-Term; K1; K18]		FALSE	3.41169e-07	0	1	2	6	E9Q9C6	E9Q9C6 [1730-1747]	1	2770.62	High	High	High	High	High	High	High	High	High	High	0.062	0.106	0.176	0.438	0.927	0.792	0.678	1.646	1.129	115900	199500	329900	822800	1878000	1740000	1488000	1274000	3092000	2120000	2	2	2	2	2	2
FALSE	High	[R].VAYDLVYYVR.[V]	1xTMT6plex [N-Term]		FALSE	0.00463649	0	1	2	11	E9Q9C6	E9Q9C6 [950-959]	0	1489.83	High	High	High	High	High	High	High	High	High	High	0.282	0.496	0.846	2.944	1.588	3.255	1.227	4.143	2.15	215000	378000	644800	2243000	762000	1210000	2480000	935000	3157000	1638000	5	5	5	5	5	5
FALSE	High	[R].LLAPGQEVFDDDR.[C]	1xTMT6plex [N-Term]		FALSE	0.000168465	0	1	2	6	E9Q9C6	E9Q9C6 [391-403]	0	1703.88	High	High	High	High	High	High	High	High	High	High	0.608	1.568	0.553	1.337	1.446	0.869	0.908	2.425	1.731	583000	1503000	530400	1281000	958600	1386000	832800	870900	2324000	1659000	4	4	4	4	4	4
FALSE	High	[R].APGSSLGCGEGCGPQGCPVCLAEETQAYEK.[N]	2xTMT6plex [N-Term; K30]; 4xCarbamidomethyl [C8; C12; C17; C20]		FALSE	1.13369e-05	0	1	2	3	E9Q9C6	E9Q9C6 [2195-2224]	0	3627.66	High	High	High	High	High	High	High	High	High	High	1.471	1.912	1.773	3.256	1.44	0.628	0.985	1.136	1.38	82300	107000	99230	182200	55950	80580	35160	55110	63560	77200	2	2	2	2	2	2
FALSE	High	[R].VPAAYAGTLCGLCGNYNK.[N]	2xTMT6plex [N-Term; K18]; 2xCarbamidomethyl [C10; C13]		FALSE	1.51903e-06	0	1	3	9	E9Q9C6	E9Q9C6 [1779-1796]	0	2387.23	High	High	High	High	High	High	High	High	High	High	0.257	0.478	0.283	0.44	1.117	0.713	0.812	2.359	1.298	330600	614300	363600	565400	1286000	1437000	917100	1044000	3033000	1669000	6	6	6	6	6	6
FALSE	High	[R].VPAAYAGTLCGLCGNYNK.[N]	2xTMT6plex [N-Term; K18]; 1xDeamidated [N15]; 2xCarbamidomethyl [C10; C13]		FALSE	0.000967202	0	1	3	2	E9Q9C6	E9Q9C6 [1779-1796]	0	2388.21	High	High	High	High	High	High	High	High	High	High	0.244	0.447	0.235	0.317	1.118	0.696	0.807	2.268	1.22	53270	97470	51180	69250	218100	243900	151800	176100	494700	266100	1	1	1	1	1	1
FALSE	High	[R].VNGVLMALPVYLAGGR.[I]	1xTMT6plex [N-Term]; 1xDeamidated [N2]		FALSE	0.00528422	0	1	2	4	E9Q9C6	E9Q9C6 [1336-1351]	0	1860.06	High	High	High	High	High	High	High	High	High	High	0.923	1.397	1.317	2.971	1.456	2.555	1.077	3.249	1.67	48580	73580	69360	156400	52660	76690	134500	56730	171100	87920	2	2	2	2	2	2
FALSE	High	[R].VVAHGVEVAVR.[R]	1xTMT6plex [N-Term]		FALSE	0.00119266	0	1	2	7	E9Q9C6	E9Q9C6 [509-519]	0	1364.82	High	High	High	High	High	High	High	High	High	High	0.21	0.331	0.429	0.977	1.194	0.977	1.314	1.423	0.925	601200	949400	1231000	2800000	2866000	3421000	2801000	3766000	4077000	2650000	2	2	2	2	2	2
FALSE	High	[K].QMCGLCGDYNGDPK.[D]	2xTMT6plex [N-Term; K14]; 2xCarbamidomethyl [C3; C6]		FALSE	0.00767538	0	1	2	7	E9Q9C6	E9Q9C6 [969-982]	0	2072.96	High	High	High	High	High	High	High	High	High	High	0.289	0.604	0.957	0.521	1.065	0.947	1.459	1.552	1.583	219600	458900	727700	395700	760200	810000	720200	1109000	1180000	1204000	2	2	2	2	2	2
FALSE	High	[K].QMCGLCGDYNGDPK.[D]	2xTMT6plex [N-Term; K14]; 1xDeamidated [N10]; 2xCarbamidomethyl [C3; C6]		FALSE	4.37845e-05	0	1	2	11	E9Q9C6	E9Q9C6 [969-982]	0	2073.94	High	High	High	High	High	High	High	High	High	High	0.187	0.41	0.259	0.458	1.217	0.712	1.65	1.6	1.564	324000	711400	448500	794000	1734000	2111000	1234000	2861000	2774000	2712000	7	7	7	7	7	7
FALSE	High	[K].QMCGLCGDYNGDPK.[D]	2xTMT6plex [N-Term; K14]; 2xCarbamidomethyl [C3; C6]; 1xOxidation [M2]		FALSE	0.0010821	0	1	2	2	E9Q9C6	E9Q9C6 [969-982]	0	2088.96	High	High	High	High	High	High	High	High	High	High	0.309	0.673	0.436	0.729	1.261	0.868	1.362	2.103	1.471	12760	27760	18020	30080	41280	52050	35840	56200	86800	60720	1	1	1	1	1	1
FALSE	High	[K].QMCGLCGDYNGDPK.[D]	2xTMT6plex [N-Term; K14]; 1xDeamidated [N10]; 2xCarbamidomethyl [C3; C6]; 1xOxidation [M2]		FALSE	0.00198381	0	1	2	2	E9Q9C6	E9Q9C6 [969-982]	0	2089.94	High	High	High	High	High	High	High	High	High	High	0.229	0.526	0.239	0.475	0.843	0.745	1.099	1.856	1.205	16400	37590	17080	33950	71500	60250	53240	78590	132700	86150	1	1	1	1	1	1
FALSE	High	[R].TDSVCPLQCPAHSHYSICTR.[S]	1xTMT6plex [N-Term]; 3xCarbamidomethyl [C5; C9; C18]		FALSE	2.00382e-06	0	1	2	10	E9Q9C6	E9Q9C6 [2291-2310]	0	2618.21	High	High	High	High	High	High	High	High	High	High	0.486	1.141	0.759	6.581	1.602	0.845	0.94	2.038	1.194	386500	908000	604200	5237000	795800	1275000	672400	747900	1621000	949900	7	7	7	7	7	7
FALSE	High	[R].CTCDGATQK.[V]	2xTMT6plex [N-Term; K9]; 2xCarbamidomethyl [C1; C3]		FALSE	0.00839403	0	1	3	3	E9Q9C6	E9Q9C6 [408-416]	0	1498.74	High	High	High	High	High	High	High	High	High	High	0.377	0.637	0.411	1.004	1.45	0.75	1.256	1.824	1.451	158500	267800	172600	422000	420300	609500	315200	527900	766500	609900	3	3	3	3	3	3
FALSE	High	[R].QCVYDMCAHK.[G]	2xTMT6plex [N-Term; K10]; 2xCarbamidomethyl [C2; C7]		FALSE	0.000949275	0	1	2	10	E9Q9C6	E9Q9C6 [2253-2262]	0	1769.85	High	High	High	High	High	High	High	High	High	High	0.243	0.508	0.297	0.37	1.194	0.66	1.054	1.815	1.839	1067000	2230000	1302000	1626000	4391000	5244000	2898000	4627000	7971000	8075000	5	5	5	5	5	5
FALSE	High	[R].QCVYDMCAHK.[G]	2xTMT6plex [N-Term; K10]; 2xCarbamidomethyl [C2; C7]; 1xOxidation [M6]		FALSE	0.00226135	0	1	2	7	E9Q9C6	E9Q9C6 [2253-2262]	0	1785.85	High	High	High	High	High	High	High	High	High	High	0.022	0.086	0.068	0.199	0.876	0.945	1.277	1.321	1.194	36500	145000	114400	337200	1691000	1482000	1598000	2161000	2235000	2019000	2	2	2	2	2	2
FALSE	High	[R].VLIDGVLQYLPFQAAGGK.[I]	2xTMT6plex [N-Term; K18]		FALSE	0.000217291	0	1	1	2	E9Q9C6	E9Q9C6 [526-543]	0	2347.38	High	High	High	High	High	High	High	High	High	High
FALSE	High	[R].CFCSPNNGLTCHEAGCPSGHVCEIQAGVR.[E]	1xTMT6plex [N-Term]; 2xDeamidated [N6; N7]; 5xCarbamidomethyl [C1; C3; C11; C16; C22]		FALSE	8.21134e-05	0	1	2	1	E9Q9C6	E9Q9C6 [2376-2404]	0	3505.5	High	High	High	High	High	High	High	High	High	High	0.839	1.461	0.956	2.252	1.444	0.933	1.321	2.378	1.785	15700	27340	17880	42120	18710	27010	17460	24710	44500	33390	1	1	1	1	1	1
FALSE	High	[K].GMMCQDHSCKPGQVCEPSGGVLTCVTK.[D]	3xTMT6plex [N-Term; K10; K27]; 4xCarbamidomethyl [C4; C9; C15; C24]		FALSE	0.000350824	0	1	3	1	E9Q9C6	E9Q9C6 [1196-1222]	0	3710.79	High	High	High	High	High	High	High	High	High	High
FALSE	High	[K].GMMCQDHSCKPGQVCEPSGGVLTCVTK.[D]	3xTMT6plex [N-Term; K10; K27]; 4xCarbamidomethyl [C4; C9; C15; C24]; 1xOxidation [M]		FALSE	0.00241887	0	1	3	2	E9Q9C6	E9Q9C6 [1196-1222]	0	3726.78	High	High	High	High	High	High	High	High	High	High	0.812	1.248	0.851	2.128	1.322	1.288	1.252	1.975	1.714	19820	30450	20770	51910	24400	32240	31420	30550	48180	41810	1	1	1	1	1	1
FALSE	High	[K].GMMCQDHSCKPGQVCEPSGGVLTCVTK.[D]	3xTMT6plex [N-Term; K10; K27]; 1xDeamidated [Q13]; 4xCarbamidomethyl [C4; C9; C15; C24]; 1xOxidation [M]		FALSE	0.00277793	0	1	3	4	E9Q9C6	E9Q9C6 [1196-1222]	0	3727.76	High	High	High	High	High	High	High	High	High	High	1.342	1.583	0.956	2.886	1.244	1.673	1.447	1.904	1.714	70010	82550	49850	150500	52160	64870	87240	75440	99280	89370	2	2	2	2	2	2
FALSE	High	[R].SCQGSCAALSGLTGCTTR.[C]	1xTMT6plex [N-Term]; 3xCarbamidomethyl [C2; C6; C15]		FALSE	2.50062e-07	0	1	2	8	E9Q9C6	E9Q9C6 [2311-2328]	0	2115.98	High	High	High	High	High	High	High	High	High	High	0.606	0.862	0.823	1.597	1.147	1.066	1.02	2.772	1.554	242300	344300	329100	638300	399700	458300	425900	407500	1108000	621000	6	6	6	6	6	6
FALSE	High	[K].LDDGDYLCDDGCHNSCPSCTPGQTQHYK.[G]	2xTMT6plex [N-Term; K28]; 4xCarbamidomethyl [C8; C12; C16; C19]		FALSE	4.15761e-06	0	1	2	4	E9Q9C6	E9Q9C6 [226-253]	0	3758.6	High	High	High	High	High	High	High	High	High	High	0.193	0.379	0.449	2.218	1.227	1.061	0.575	4.33	1.604	20100	39420	46650	230700	104000	127600	110300	59780	450300	166800	2	2	2	2	2	2
FALSE	High	[K].LDDGDYLCDDGCHNSCPSCTPGQTQHYK.[G]	2xTMT6plex [N-Term; K28]; 1xDeamidated [N/Q]; 4xCarbamidomethyl [C8; C12; C16; C19]		FALSE	1.71122e-05	0	1	2	4	E9Q9C6	E9Q9C6 [226-253]	0	3759.58	High	High	High	High	High	High	High	High	High	High	0.386	0.679	0.566	2.201	1.647	1.468	1.129	4.878	2.21	26760	46990	39200	152400	69250	114100	101700	78160	337800	153100	2	2	2	2	2	2
FALSE	High	[K].VLFDGDAHILMSIPSSFR.[G]	1xTMT6plex [N-Term]; 1xOxidation [M11]		FALSE	0.00436737	0	1	2	5	E9Q9C6	E9Q9C6 [2140-2157]	0	2250.18	High	High	High	High	High	High	High	High	High	High	0.612	0.825	0.552	0.862	1.823	0.77	0.786	1.479	1.14	139500	188200	126000	196500	228100	415800	175700	179400	337300	259900	4	4	4	4	4	4
FALSE	High	[K].VLFDGDAHILMSIPSSFR.[G]	1xTMT6plex [N-Term]		FALSE	0.00114457	0	1	2	6	E9Q9C6	E9Q9C6 [2140-2157]	0	2234.18	High	High	High	High	High	High	High	High	High	High	2.497	0.89	1.051	1.381	1.023	1.45	0.761	2.667	1.184	277500	98880	116900	153500	111200	113700	161100	84640	296400	131600	4	4	4	4	4	4
FALSE	High	[K].VGGAPGCDQCEPEPCPKPCTPEEQEPFR.[G]	2xTMT6plex [N-Term; K17]; 4xCarbamidomethyl [C7; C10; C15; C19]		FALSE	5.28298e-06	0	1	2	9	E9Q9C6	E9Q9C6 [1814-1841]	0	3686.67	High	High	High	High	High	High	High	High	High	High	0.119	0.206	0.18	0.282	0.745	0.48	0.715	1.852	1.416	86620	149300	130600	204800	726200	541000	348300	519300	1345000	1028000	5	5	5	5	5	5
FALSE	High	[K].VGGAPGCDQCEPEPCPKPCTPEEQEPFR.[G]	2xTMT6plex [N-Term; K17]; 1xDeamidated [Q9]; 4xCarbamidomethyl [C7; C10; C15; C19]		FALSE	0.000113719	0	1	2	2	E9Q9C6	E9Q9C6 [1814-1841]	0	3687.66	High	High	High	High	High	High	High	High	High	High	0.075	0.132	0.093	0.203	0.783	0.464	0.713	1.702	1.376	13340	23500	16560	36190	178400	139700	82790	127100	303600	245400	2	2	2	2	2	2
FALSE	High	[R].ISVINGGSK.[A]	2xTMT6plex [N-Term; K9]; 1xDeamidated [N5]		FALSE	0.0150585	0.00117917	1	3	13	E9Q9C6	E9Q9C6 [1352-1360]	0	1333.81	High	High	High	High	High	High	High	High	High	High	0.492	1.099	0.665	1.42	1.338	1.356	1.01	3.133	1.613	2436000	5443000	3294000	7033000	4954000	6629000	6720000	5003000	15520000	7991000	12	12	12	12	12	12
FALSE	High	[R].ISVINGGSK.[A]	2xTMT6plex [N-Term; K9]		FALSE	0.0128338	0.00117917	1	3	4	E9Q9C6	E9Q9C6 [1352-1360]	0	1332.83	High	High	High	High	High	High	High	High	High	High	0.601	1.259	1.312	1.476	1.495	1.208	1.162	2.793	2.004	401100	840300	875200	984700	667300	997900	805900	775200	1864000	1337000	2	2	2	2	2	2
FALSE	High	[K].DPCHGITCRPQETCK.[V]	2xTMT6plex [N-Term; K15]; 3xCarbamidomethyl [C3; C8; C14]		FALSE	0.0114356	0.00117917	1	2	10	E9Q9C6	E9Q9C6 [1223-1237]	0	2317.13	High	High	High	High	High	High	High	High	High	High	1.008	1.576	0.855	2.273	1.432	1.872	1.275	2.661	1.471	683400	1069000	579300	1541000	677900	970500	1269000	864200	1804000	996900	5	5	5	5	5	5
FALSE	High	[R].VDVTLPSSYHGAVCGLCGNMDK.[N]	2xTMT6plex [N-Term; K22]; 1xDeamidated [N19]; 2xCarbamidomethyl [C14; C17]; 1xOxidation [M20]		FALSE	0.0118252	0.00117917	1	2	1	E9Q9C6	E9Q9C6 [1379-1400]	0	2855.38	High	High	High	High	High	High	High	High	High	High
FALSE	High	[R].GSQTVSYTR.[A]	1xTMT6plex [N-Term]		FALSE	0.0116939	0.00117917	1	2	2	E9Q9C6	E9Q9C6 [497-505]	0	1227.65	High	High	High	High	High	High	High	High	High	High	0.519	0.672	1.663	11.912	2.393	1.679	1.155	2.131	1.009	107600	139200	344700	2469000	207200	496000	347900	239400	441600	209100	1	1	1	1	1	1
FALSE	High	[R].GSQAVSYTR.[S]	1xTMT6plex [N-Term]		FALSE	0.0140841	0.00117917	1	2	3	E9Q9C6	E9Q9C6 [1702-1710]	0	1197.64	High	High	High	High	High	High	High	High	High	High	0.76	0.827	1.528	6.732	1.879	1.724	1.411	1.86	1.444	345200	375700	693900	3057000	454100	853200	782800	640600	844600	655700	2	2	2	2	2	2
FALSE	High	[K].LPVMLDGGK.[I]	2xTMT6plex [N-Term; K9]		FALSE	0.0114783	0.00117917	1	2	10	E9Q9C6	E9Q9C6 [922-930]	0	1387.84	High	High	High	High	High	High	High	High	High	High	0.451	1.063	0.441	0.923	1.149	1.782	1.168	3.347	2.284	1176000	2771000	1150000	2406000	2605000	2993000	4642000	3043000	8720000	5951000	7	7	7	7	7	7
FALSE	High	[R].VTIPGNYYK.[Q]	2xTMT6plex [N-Term; K9]		FALSE	0.0109768	0.00117917	1	2	16	E9Q9C6	E9Q9C6 [960-968]	0	1512.88	High	High	High	High	High	High	High	High	High	High	0.202	0.45	0.238	0.464	1.04	0.975	1.12	1.979	1.647	2508000	5587000	2956000	5761000	12420000	12920000	12110000	13910000	24580000	20460000	14	14	14	14	14	14
FALSE	High	[K].NPNDDLTAVGGKPEGWK.[V]	3xTMT6plex [N-Term; K12; K17]; 1xDeamidated [N]		FALSE	0.0120025	0.00117917	1	3	3	E9Q9C6	E9Q9C6 [1797-1813]	0	2486.35	High	High	High	High	High	High	High	High	High	High	0.183	0.435	0.13	0.432	1.13	0.713	1.088	2.464	1.706	17710	42100	12590	41810	96730	109300	68990	105300	238300	165100	1	1	1	1	1	1
FALSE	High	[R].VTIPGNYYK.[Q]	2xTMT6plex [N-Term; K9]; 1xDeamidated [N6]		FALSE	0.0120922	0.00117917	1	2	7	E9Q9C6	E9Q9C6 [960-968]	0	1513.87	High	High	High	High	High	High	High	High	High	High	0.185	0.39	0.474	0.399	1.111	0.73	0.941	1.47	1.413	646200	1364000	1660000	1395000	3499000	3888000	2553000	3291000	5144000	4944000	4	4	4	4	4	4
FALSE	High	[K].LQVNGEFVALPFHLDQK.[L]	2xTMT6plex [N-Term; K17]; 2xDeamidated [Q2; N4]		FALSE	0.0171489	0.00171593	1	2	1	E9Q9C6	E9Q9C6 [1731-1747]	0	2415.33	High	High	High	High	High	High	High	High	High	High	0.472	0.4	0.593	0.712	0.997	1.076	0.904	2.649	1.781	14430	12210	18120	21750	30550	30460	32870	27610	80920	54420	1	1	1	1	1	1
FALSE	High	[R].NIVLQTNK.[G]	2xTMT6plex [N-Term; K8]		FALSE	0.0379724	0.00171593	1	2	12	E9Q9C6	E9Q9C6 [2129-2136]	0	1387.87	High	High	High	High	High	High	High	High	High	High	0.344	0.539	0.26	0.625	1.005	0.727	1.1	1.528	1.223	3486000	5459000	2630000	6325000	10120000	10170000	7364000	11140000	15470000	12380000	7	7	7	7	7	7
FALSE	High	[R].LPASLSEGR.[L]	1xTMT6plex [N-Term]		FALSE	0.130479	0.00171593	1	2	4	E9Q9C6	E9Q9C6 [143-151]	0	1158.67	High	High	High	High	High	High	High	High	High	High	1.109	1.174	2.243	1.316	1.578	1.468	1.044	3.556	1.663	1795000	1901000	3631000	2130000	1619000	2555000	2377000	1691000	5757000	2692000	4	4	4	4	4	4
FALSE	High	[K].VLVENEHR.[G]	1xTMT6plex [N-Term]		FALSE	0.0358031	0.00171593	1	2	9	E9Q9C6	E9Q9C6 [489-496]	0	1224.69	High	High	High	High	High	High	High	High	High	High	0.263	0.438	0.229	0.488	1.407	0.417	0.908	1.295	1.062	2022000	3373000	1761000	3752000	7692000	10820000	3206000	6981000	9961000	8166000	7	7	7	7	7	7
FALSE	High	[K].VKVNGVDTK.[L]	3xTMT6plex [N-Term; K2; K9]; 1xDeamidated [N4]		FALSE	0.101405	0.00171593	1	2	7	E9Q9C6	E9Q9C6 [913-921]	1	1648.02	High	High	High	High	High	High	High	High	High	High	0.588	1.174	0.538	1.226	1.018	2.076	1.059	1.776	1.592	625600	1250000	572200	1305000	1064000	1083000	2209000	1127000	1890000	1694000	3	3	3	3	3	3
FALSE	High	[R].LEQSQWK.[V]	2xTMT6plex [N-Term; K7]		FALSE	0.135551	0.00171593	1	2	12	E9Q9C6	E9Q9C6 [906-912]	0	1376.79	High	High	High	High	High	High	High	High	High	High	0.174	0.463	0.252	0.329	1.128	0.818	1.376	1.567	1.617	1532000	4064000	2210000	2891000	8786000	9913000	7187000	12090000	13770000	14200000	8	8	8	8	8	8
FALSE	High	[K].LLNPQGAIR.[D]	1xTMT6plex [N-Term]		FALSE	0.0172766	0.00171593	1	2	2	E9Q9C6	E9Q9C6 [665-673]	0	1210.75	High	High	High	High	High	High	High	High	High	High	0.198	0.126	0.308	0.383	1.064	0.552	0.679	1.376	1.017	843600	535200	1310000	1626000	4250000	4520000	2347000	2885000	5849000	4324000	1	1	1	1	1	1
FALSE	High	[K].LPVMLDGGK.[I]	2xTMT6plex [N-Term; K9]; 1xOxidation [M4]		FALSE	0.0452778	0.00171593	1	2	7	E9Q9C6	E9Q9C6 [922-930]	0	1403.83	High	High	High	High	High	High	High	High	High	High	0.43	1.022	0.414	0.662	1.209	1.132	1.276	2.318	1.819	699000	1663000	673800	1076000	1627000	1966000	1841000	2075000	3771000	2960000	5	5	5	5	5	5
FALSE	High	[K].VNGVDTK.[L]	2xTMT6plex [N-Term; K7]		FALSE	0.152408	0.00250807	1	2	3	E9Q9C6	E9Q9C6 [915-921]	0	1190.71	High	High	High	High	High	High	High	High	High	High	0.31	0.511	0.232	0.503	1.066	0.805	1.034	1.883	1.741	982700	1622000	737400	1598000	3174000	3382000	2556000	3281000	5976000	5527000	1	1	1	1	1	1
FALSE	High	[K].VPSSYAK.[D]	2xTMT6plex [N-Term; K7]		FALSE	0.160442	0.00250807	1	2	3	E9Q9C6	E9Q9C6 [575-581]	0	1209.72	High	High	High	High	High	High	High	High	High	High	0.04	0.166	0.162	0.814	1.231	0.57	0.997	2.283	1.539	263000	1086000	1065000	5336000	6553000	8068000	3735000	6533000	14960000	10090000	2	2	2	2	2	2
FALSE	High	[K].VNGVDTK.[L]	2xTMT6plex [N-Term; K7]; 1xDeamidated [N2]		FALSE	0.172345	0.00492494	1	2	5	E9Q9C6	E9Q9C6 [915-921]	0	1191.7	High	High	High	High	High	High	High	High	High	High	0.23	0.596	0.886	0.411	1.169	0.914	1.354	1.962	1.735	1529000	3962000	5892000	2731000	6650000	7771000	6080000	9001000	13050000	11540000	3	3	3	3	3	3
FALSE	High	[K].VLSPLEYFR.[Q]	1xTMT6plex [N-Term]		FALSE	0.185676	0.00804114	1	2	2	E9Q9C6	E9Q9C6 [2244-2252]	0	1352.78	High	High	High	High	High	High	High	High	High	High	0.155	0.293	0.17	0.29	1.08	0.451	0.732	1.336	1.16	373700	705000	409100	698800	2408000	2600000	1087000	1761000	3217000	2793000	2	2	2	2	2	2
High	Master Protein	E9QPG8	Deleted in malignant brain tumors 1 protein OS=Mus musculus GN=Dmbt1 PE=2 SV=1	FALSE	0	398.447	28.2631	26	533	26	1	1946	211.857	4.98	High	High	High	High	High	High	High	High	High	High	Phospho [S1152; S1152]		ENSMUSG00000047517		7	cell proliferation;regulation of biological process;transport	cytoplasm;extracellular;membrane	receptor activity	Pf00100, Pf00431, Pf00530	0.362	0.607	0.392	0.831	1.259	1.35	1.297	2.636	1.919	17750000	29720000	19210000	40700000	49000000	61710000	66160000
Checked	Confidence	Annotated Sequence	Modifications	Modifications in Master Proteins	Contaminant	Qvality PEP	Qvality q-value	# Protein Groups	# Proteins	# PSMs	Master Protein Accessions	Positions in Master Proteins	# Missed Cleavages	Theo. MH+ [Da]	Found in Sample: [S1] F1: 126, Sample	Found in Sample: [S2] F1: 127N, Sample	Found in Sample: [S3] F1: 127C, Sample	Found in Sample: [S4] F1: 128N, Sample	Found in Sample: [S5] F1: 128C, Control	Found in Sample: [S6] F1: 129N, Sample	Found in Sample: [S7] F1: 129C, Sample	Found in Sample: [S8] F1: 130N, Sample	Found in Sample: [S9] F1: 130C, Sample	Found in Sample: [S10] F1: 131, Sample	Abundance Ratio: (F1, 126) / (F1, 128C)	Abundance Ratio: (F1, 127N) / (F1, 128C)	Abundance Ratio: (F1, 127C) / (F1, 128C)	Abundance Ratio: (F1, 128N) / (F1, 128C)	Abundance Ratio: (F1, 129N) / (F1, 128C)	Abundance Ratio: (F1, 129C) / (F1, 128C)	Abundance Ratio: (F1, 130N) / (F1, 128C)	Abundance Ratio: (F1, 130C) / (F1, 128C)	Abundance Ratio: (F1, 131) / (F1, 128C)	Abundance: F1: 126, Sample	Abundance: F1: 127N, Sample	Abundance: F1: 127C, Sample	Abundance: F1: 128N, Sample	Abundance: F1: 128C, Control	Abundance: F1: 129N, Sample	Abundance: F1: 129C, Sample	Abundance: F1: 130N, Sample	Abundance: F1: 130C, Sample	Abundance: F1: 131, Sample	Abundances Count: F1: 126, Sample	Abundances Count: F1: 127N, Sample	Abundances Count: F1: 127C, Sample	Abundances Count: F1: 128N, Sample	Abundances Count: F1: 128C, Control	Abundances Count: F1: 129N, Sample
FALSE	High	[R].EVIFTIPYTGCGTIK.[Q]	2xTMT6plex [N-Term; K15]; 1xCarbamidomethyl [C11]		FALSE	6.34236e-05	0	1	5	19	E9QPG8	E9QPG8 [1656-1670]	0	2157.2	High	High	High	High	High	High	High	High	High	High	0.088	0.177	0.222	1.019	1.089	1.327	1.113	2.826	1.504	314600	630600	794800	3640000	3572000	3889000	4740000	3978000	10090000	5373000	8	8	8	8	8	8
FALSE	High	[R].CSWEILVPNMNR.[V]	1xTMT6plex [N-Term]; 1xCarbamidomethyl [C1]		FALSE	0.000749914	0	1	5	33	E9QPG8	E9QPG8 [1026-1037]; [1152-1163]	0	1747.88	High	High	High	High	High	High	High	High	High	High	0.307	0.544	0.302	0.747	1.424	1.326	1.628	3.098	2.589	1404000	2484000	1377000	3411000	4566000	6503000	6055000	7431000	14140000	11820000	26	26	26	27	27	27
FALSE	High	[R].CSWEILVPNMNR.[V]	1xTMT6plex [N-Term]; 1xDeamidated [N]; 1xCarbamidomethyl [C1]		FALSE	0.00231268	0	1	5	6	E9QPG8	E9QPG8 [1026-1037]; [1152-1163]	0	1748.87	High	High	High	High	High	High	High	High	High	High	0.559	0.759	0.638	0.782	1.506	1.189	1.69	2.624	2.335	192900	261900	220100	269700	345000	519500	410300	582900	905300	805400	4	4	4	4	4	4
FALSE	High	[R].CSWEILVPNMNR.[V]	1xTMT6plex [N-Term]; 1xCarbamidomethyl [C1]; 1xOxidation [M10]		FALSE	0.00611272	0	1	5	18	E9QPG8	E9QPG8 [1026-1037]; [1152-1163]	0	1763.88	High	High	High	High	High	High	High	High	High	High	0.295	0.539	0.326	0.691	1.472	1.038	1.359	2.669	2.593	941000	1719000	1041000	2206000	3192000	4700000	3314000	4338000	8521000	8278000	12	12	12	12	12	12
FALSE	High	[R].VCDGSLGSFTSTSNFMSIR.[F]	1xTMT6plex [N-Term]; 1xCarbamidomethyl [C2]		FALSE	6.90009e-08	0	1	5	10	E9QPG8	E9QPG8 [1566-1584]	0	2295.09	High	High	High	High	High	High	High	High	High	High	0.481	0.736	0.465	0.865	1.307	1.555	1.347	3.18	2.528	137900	210900	133300	247900	286600	374400	445600	386100	911400	724300	6	6	6	6	6	6
FALSE	High	[R].VCDGSLGSFTSTSNFMSIR.[F]	1xTMT6plex [N-Term]; 1xCarbamidomethyl [C2]; 1xOxidation [M16]		FALSE	3.60406e-05	0	1	5	4	E9QPG8	E9QPG8 [1566-1584]	0	2311.09	High	High	High	High	High	High	High	High	High	High	0.69	1.142	0.802	0.694	1.163	1.133	1.118	2.048	1.596	225600	373100	262200	226900	326900	380100	370300	365400	669500	521500	4	4	4	4	4	4
FALSE	High	[R].VCDGSLGSFTSTSNFMSIR.[F]	1xTMT6plex [N-Term]; 1xDeamidated [N14]; 1xCarbamidomethyl [C2]; 1xOxidation [M16]		FALSE	0.00311945	0	1	5	2	E9QPG8	E9QPG8 [1566-1584]	0	2312.07	High	High	High	High	High	High	High	High	High	High	0.872	1.383	0.874	0.625	1.373	0.765	1.255	1.324	1.373	62850	99630	62960	45060	72060	98900	55150	90410	95440	98970	1	1	1	1	1	1
FALSE	High	[R].CLWNIEVPNNYR.[V]	1xTMT6plex [N-Term]; 1xCarbamidomethyl [C1]		FALSE	0.0017732	0	1	5	16	E9QPG8	E9QPG8 [1520-1531]	0	1806.92	High	High	High	High	High	High	High	High	High	High	0.388	0.578	0.437	0.787	1.479	1.38	1.914	2.37	2.238	737800	1099000	831000	1496000	1901000	2812000	2623000	3638000	4505000	4255000	11	11	11	11	11	11
FALSE	High	[R].CLWNIEVPNNYR.[V]	1xTMT6plex [N-Term]; 1xDeamidated [N]; 1xCarbamidomethyl [C1]		FALSE	0.00165771	0	1	5	6	E9QPG8	E9QPG8 [1520-1531]	0	1807.9	High	High	High	High	High	High	High	High	High	High	0.372	0.661	0.408	0.692	1.358	1.289	1.563	2.15	2.106	290900	517100	319000	541200	782400	1062000	1009000	1223000	1682000	1647000	6	6	6	6	6	6
FALSE	High	[R].GCSYDYIEIFDGPHHSSPLIAR.[V]	1xTMT6plex [N-Term]; 1xCarbamidomethyl [C2]		FALSE	3.21336e-07	0	1	5	12	E9QPG8	E9QPG8 [1544-1565]	0	2763.34	High	High	High	High	High	High	High	High	High	High	0.824	0.835	2.106	3.174	1.352	3.018	1.151	4.755	2.392	377600	382900	965200	1455000	458300	619600	1384000	527600	2179000	1096000	7	7	7	7	7	7
FALSE	High	[R].FGQGTGPIVMDDVACGGYEDYLWR.[C]	1xTMT6plex [N-Term]; 1xCarbamidomethyl [C15]		FALSE	1.24265e-08	0	1	5	26	E9QPG8	E9QPG8 [518-541]; [657-680]	0	2935.36	High	High	High	High	High	High	High	High	High	High	0.182	0.432	0.175	0.693	0.607	1.711	1.141	4.504	1.401	191900	456600	184700	731400	1056000	640800	1807000	1205000	4755000	1479000	19	21	20	21	21	21
FALSE	High	[R].FGQGTGPIVMDDVACGGYEDYLWR.[C]	1xTMT6plex [N-Term]; 1xDeamidated [Q3]; 1xCarbamidomethyl [C15]		FALSE	0.00121519	0	1	5	8	E9QPG8	E9QPG8 [518-541]; [657-680]	0	2936.34	High	High	High	High	High	High	High	High	High	High	0.482	0.585	0.621	0.587	1.014	1.574	1.25	3.167	1.74	136100	165000	175300	165500	282200	286000	444000	352800	893600	491000	5	6	5	6	6	6
FALSE	High	[R].FGQGTGPIVMDDVACGGYEDYLWR.[C]	1xTMT6plex [N-Term]; 1xCarbamidomethyl [C15]; 1xOxidation [M10]		FALSE	1.16019e-06	0	1	5	41	E9QPG8	E9QPG8 [518-541]; [657-680]	0	2951.35	High	High	High	High	High	High	High	High	High	High	0.435	0.662	0.427	1.015	0.957	1.213	1.134	2.976	1.344	442800	673900	435000	1033000	1018000	973500	1234000	1153000	3028000	1368000	24	27	24	27	27	27
FALSE	High	[R].FGQGTGPIVMDDVACGGYEDYLWR.[C]	1xTMT6plex [N-Term]; 1xDeamidated [Q3]; 1xCarbamidomethyl [C15]; 1xOxidation [M10]		FALSE	0.000545597	0	1	5	4	E9QPG8	E9QPG8 [518-541]; [657-680]	0	2952.34	High	High	High	High	High	High	High	High	High	High	0.327	0.614	0.417	0.584	1.246	1.026	0.958	2.22	1.483	51990	97670	66390	92920	159000	198100	163200	152300	353000	235800	4	4	4	4	4	4
FALSE	High	[R].FGQGSGPIVMDDVACGGYEDYLWR.[C]	1xTMT6plex [N-Term]; 1xCarbamidomethyl [C15]		FALSE	4.48079e-06	0	1	5	18	E9QPG8	E9QPG8 [92-115]	0	2921.34	High	High	High	High	High	High	High	High	High	High	0.504	1	0.363	0.659	0.768	1.25	1.065	3.813	1.394	228000	452200	164400	298200	452400	347400	565400	481800	1725000	630800	12	13	10	13	13	13
FALSE	High	[R].FGQGSGPIVMDDVACGGYEDYLWR.[C]	1xTMT6plex [N-Term]; 1xCarbamidomethyl [C15]; 1xOxidation [M10]		FALSE	6.13623e-06	0	1	5	9	E9QPG8	E9QPG8 [92-115]	0	2937.34	High	High	High	High	High	High	High	High	High	High	1.261	3.236	0.834	0.793	1.007	0.988	1.132	2.669	1.415	143700	368800	94980	90350	113900	114800	112500	129000	304100	161200	3	4	4	4	4	4
FALSE	High	[R].FGQGSGPIVMDDVACGGYEDYLWR.[C]	1xTMT6plex [N-Term]; 1xDeamidated [Q3]; 1xCarbamidomethyl [C15]; 1xOxidation [M10]		FALSE	0.00112336	0	1	5	5	E9QPG8	E9QPG8 [92-115]	0	2938.32	High	High	High	High	High	High	High	High	High	High	0.817	0.928	0.621	0.649	1.145	0.949	1.458	2.726	1.622	98770	112200	75050	78460	120900	138400	114700	176300	329600	196100	5	5	5	5	5	5
FALSE	High	[R].GSWGTVCDDSWGISDANVVCR.[Q]	1xTMT6plex [N-Term]; 2xCarbamidomethyl [C7; C20]		FALSE	9.06234e-07	0	1	5	13	E9QPG8	E9QPG8 [1390-1410]	0	2570.16	High	High	High	High	High	High	High	High	High	High	0.351	0.477	0.239	0.892	0.865	0.401	0.494	0.697	0.916	162900	221400	110800	414000	464200	401600	186200	229100	323600	425300	2	2	2	2	2	2
FALSE	High	[R].CSWEILVPSMNR.[V]	1xTMT6plex [N-Term]; 1xCarbamidomethyl [C1]		FALSE	0.00252993	0	1	5	13	E9QPG8	E9QPG8 [1268-1279]	0	1720.87	High	High	High	High	High	High	High	High	High	High	0.513	0.795	0.495	1.172	1.333	1.977	1.311	3.389	1.904	547600	848300	528000	1250000	1067000	1422000	2109000	1398000	3615000	2031000	8	8	8	8	8	8
FALSE	High	[R].SYLQSMGYSAR.[D]	1xTMT6plex [N-Term]		FALSE	0.00178651	0	1	5	3	E9QPG8	E9QPG8 [1625-1635]	0	1491.75	High	High	High	High	High	High	High	High	High	High	0.695	0.88	0.449	1.169	1.25	1.671	2.083	2.35	2.025	345200	437000	222700	580300	496500	620800	829800	1034000	1167000	1006000	1	1	1	1	1	1
FALSE	High	[R].QLGCGWAVSAPGNAYFGPGSGSIVLDDVACTGHEDYLWR.[C]	1xTMT6plex [N-Term]; 2xCarbamidomethyl [C4; C30]		FALSE	5.09547e-08	0	1	3	11	E9QPG8	E9QPG8 [364-402]	0	4412.07	High	High	High	High	High	High	High	High	High	High	0.052	0.054	0.028	0.191	0.576	0.106	0.088	0.311	0.586	14090	14670	7628	51840	271100	156100	28800	23880	84350	158900	3	3	2	6	7	7
FALSE	High	[R].QLGCGWAVSAPGNAYFGPGSGSIVLDDVACTGHEDYLWR.[C]	1xTMT6plex [N-Term]; 2xDeamidated [Q1; N13]; 2xCarbamidomethyl [C4; C30]		FALSE	0.000845307	0	1	3	5	E9QPG8	E9QPG8 [364-402]	0	4414.04	High	High	High	High	High	High	High	High	High	High	0.462	0.752	0.19	0.349	1.234	0.327	0.46	1.15	1.176	13140	21380	5400	9930	28450	35110	9307	13090	32710	33450	3	3	2	3	3	3
FALSE	High	[R].QLGCGWAVSAPGNAYFGPGSGSIVLDDVACTGHEDYLWR.[C]	1xTMT6plex [N-Term]; 1xDeamidated [N13]; 2xCarbamidomethyl [C4; C30]		FALSE	5.63734e-08	0	1	3	7	E9QPG8	E9QPG8 [364-402]	0	4413.05	High	High	High	High	High	High	High	High	High	High	0.203	0.209	0.178	0.19	0.678	0.212	0.389	0.532	0.642	9520	9819	8352	8904	46880	31810	9930	18240	24950	30110	2	1	2	2	2	2
FALSE	High	[R].DDTYQSYSSPSPR.[V]	1xTMT6plex [N-Term]		FALSE	0.00139561	0	1	5	2	E9QPG8	E9QPG8 [1805-1817]	0	1731.8	High	High	High	High	High	High	High	High	High	High	0.298	0.286	0.792	0.686	1.422	1.1	1.869	1.816	2.025	82550	79300	219700	190100	277200	394100	304900	518100	503400	561400	2	2	2	2	2	2
FALSE	High	[R].VEILYQGSWGTVCDDSWDVSDANVVCR.[Q]	1xTMT6plex [N-Term]; 1xDeamidated [N/Q]; 2xCarbamidomethyl [C13; C26]		FALSE	0.0079374	0	1	5	2	E9QPG8	E9QPG8 [199-225]	0	3360.54	High	High	High	High	High	High	High	High	High	High	0.79	1.349	1.035	0.647	1.152	0.674	0.92	1.707	1.613	20570	35150	26950	16860	26050	30000	17560	23970	44460	42010	2	2	2	2	2	2
FALSE	High	[R].VEILYQGSWGTVCDDSWDVSDANVVCR.[Q]	1xTMT6plex [N-Term]; 2xCarbamidomethyl [C13; C26]		FALSE	0.00132936	0	1	5	2	E9QPG8	E9QPG8 [199-225]	0	3359.55	High	High	High	High	High	High	High	High	High	High
FALSE	High	[R].VEILYQGSWGTVCDDSWDTNDANVVCR.[Q]	1xTMT6plex [N-Term]; 1xDeamidated [N/Q]; 2xCarbamidomethyl [C13; C26]		FALSE	0.00179993	0	1	5	2	E9QPG8	E9QPG8 [337-363]	0	3389.53	High	High	High	High	High	High	High	High	High	High	0.755	1.351	1.15	1.042	1.246	0.953	0.829	1.713	1.34	7805	13960	11880	10770	10330	12870	9851	8567	17700	13850	1	1	1	1	1	1
FALSE	High	[R].QLGCGLAVSAPGNAR.[F]	1xTMT6plex [N-Term]; 1xCarbamidomethyl [C4]		FALSE	0.000205428	0	1	5	12	E9QPG8	E9QPG8 [77-91]	0	1699.91	High	High	High	High	High	High	High	High	High	High	0.363	1.049	0.564	0.654	1.075	0.929	1	1.487	1.64	855100	2468000	1326000	1538000	2352000	2528000	2184000	2353000	3497000	3858000	10	10	10	10	10	10
FALSE	High	[R].QLGCGLAVSAPGNAR.[F]	1xTMT6plex [N-Term]; 1xDeamidated [N13]; 1xCarbamidomethyl [C4]		FALSE	0.00484912	0	1	5	1	E9QPG8	E9QPG8 [77-91]	0	1700.9	High	High	High	High	High	High	High	High	High	High	0.755	2.645	1.248	1.355	1.186	1.466	0.996	2.193	1.396	63890	223900	105600	114700	84640	100400	124000	84330	185600	118100	1	1	1	1	1	1
FALSE	High	[R].QLGCGWAVSAPGNAYFGPGSGSIVLDDVACTGHEDYLWSCSHR.[G]	1xTMT6plex [N-Term]; 2xDeamidated [Q1; N13]; 3xCarbamidomethyl [C4; C30; C40]		FALSE	0.00223611	0	1	5	2	E9QPG8	E9QPG8 [781-823]	0	4885.19	High	High	High	High	High	High	High	High	High	High	0.234	0.512	0.243	0.338	0.737	0.01	0.456	0.459	0.716	5643	12370	5873	8157	24150	17800		11020	11090	17290	1	1	1	1	1	1
FALSE	High	[R].QLGCGWAVSAPGNAYFGPGSGSIVLDDVACTGHEDYLWSCSHR.[G]	1xTMT6plex [N-Term]; 1xDeamidated [N13]; 3xCarbamidomethyl [C4; C30; C40]		FALSE	1.57697e-06	0	1	5	3	E9QPG8	E9QPG8 [781-823]	0	4884.21	High	High	High	High	High	High	High	High	High	High	0.225	0.516	0.01	0.01	1.172	0.185	0.226	0.503	0.686	4013	9188			17800	20870	3295	4019	8950	12220	1	1			1	1
FALSE	High	[R].QLGCGWAVSAPGNAYFGPGSGSIVLDDVACTGHEDYLWSCSHR.[G]	1xTMT6plex [N-Term]; 3xCarbamidomethyl [C4; C30; C40]		FALSE	2.51e-07	0	1	5	1	E9QPG8	E9QPG8 [781-823]	0	4883.22	High	High	High	High	High	High	High	High	High	High	0.108	0.222	0.119	0.198	0.93	0.175	0.19	0.642	0.626	2309	4730	2551	4228	21350	19860	3747	4064	13720	13370	1	1	1	1	1	1
FALSE	High	[R].QLGCGLAVSAPGSAR.[F]	1xTMT6plex [N-Term]; 1xCarbamidomethyl [C4]		FALSE	0.000124408	0	1	5	15	E9QPG8	E9QPG8 [503-517]; [642-656]	0	1672.9	High	High	High	High	High	High	High	High	High	High	0.329	0.569	0.225	0.459	1.36	0.928	0.968	1.502	0.997	1627000	2808000	1110000	2267000	4937000	6715000	4580000	4780000	7415000	4924000	7	7	7	7	7	7
FALSE	High	[R].VEILYQGSWGTVCDDSWDTK.[D]	2xTMT6plex [N-Term; K20]; 1xDeamidated [Q6]; 1xCarbamidomethyl [C13]		FALSE	9.0168e-05	0	1	5	29	E9QPG8	E9QPG8 [754-773]	0	2818.36	High	High	High	High	High	High	High	High	High	High	0.612	1.064	0.666	0.906	1.066	1.722	0.843	3.903	1.653	141700	246100	154100	209600	231400	246500	398300	195100	902900	382400	11	11	11	11	11	11
FALSE	High	[R].VEILYQGSWGTVCDDSWDTK.[D]	2xTMT6plex [N-Term; K20]; 1xCarbamidomethyl [C13]		FALSE	5.40297e-06	0	1	5	87	E9QPG8	E9QPG8 [754-773]	0	2817.38	High	High	High	High	High	High	High	High	High	High	0.463	0.948	0.493	0.868	0.974	1.881	0.871	4.491	1.84	987300	2021000	1051000	1849000	2131000	2077000	4009000	1856000	9572000	3923000	57	58	58	58	58	58
FALSE	High	[R].VEILYQGSWGTVCDDSWDLNDANVVCR.[Q]	1xTMT6plex [N-Term]; 2xCarbamidomethyl [C13; C26]		FALSE	8.55647e-05	0	1	5	8	E9QPG8	E9QPG8 [50-76]; [476-502]; [615-641]	0	3400.58	High	High	High	High	High	High	High	High	High	High	0.526	0.628	0.488	0.365	1.532	0.46	0.702	0.922	1.307	19810	23640	18350	13740	37650	57690	17320	26420	34700	49200	2	2	2	2	2	2
FALSE	High	[R].VEILYQGSWGTVCDDSWDLNDANVVCR.[Q]	1xTMT6plex [N-Term]; 1xDeamidated [N/Q]; 2xCarbamidomethyl [C13; C26]		FALSE	0.00012119	0	1	5	11	E9QPG8	E9QPG8 [50-76]; [476-502]; [615-641]	0	3401.56	High	High	High	High	High	High	High	High	High	High	1.103	1.48	1.096	1.002	1.02	0.723	0.618	1.611	1.589	60760	81530	60410	55220	55100	56180	39810	34050	88750	87530	5	6	6	6	6	6
FALSE	High	[R].VEILYQGSWGTVCDDSWDLNDANVVCR.[Q]	1xTMT6plex [N-Term]; 2xDeamidated [N20; N23]; 2xCarbamidomethyl [C13; C26]		FALSE	0.000300919	0	1	5	3	E9QPG8	E9QPG8 [50-76]; [476-502]; [615-641]	0	3402.55	High	High	High	High	High	High	High	High	High	High	0.62	1.082	1.182	0.843	1.726	0.551	0.715	1.465	1.351	13680	23880	26090	18610	22070	38100	12160	15780	32340	29810	2	2	2	2	2	2
FALSE	High	[R].FITDHSITAR.[G]	1xTMT6plex [N-Term]		FALSE	0.0109768	0.00117917	1	5	17	E9QPG8	E9QPG8 [1585-1594]	0	1389.77	High	High	High	High	High	High	High	High	High	High	0.459	0.642	0.386	1.331	1.437	2.448	1.519	4.119	2.921	2755000	3859000	2315000	7991000	6006000	8633000	14700000	9125000	24740000	17540000	13	13	13	13	13	13
FALSE	High	[R].AVVSNGIIK.[R]	2xTMT6plex [N-Term; K9]; 1xDeamidated [N5]		FALSE	0.0105363	0.00117917	1	5	12	E9QPG8	E9QPG8 [1685-1693]	0	1359.86	High	High	High	High	High	High	High	High	High	High	0.313	0.494	0.317	0.607	1.368	1.079	1.43	1.995	1.86	1645000	2598000	1669000	3194000	5258000	7193000	5675000	7522000	10490000	9783000	9	9	9	9	9	9
FALSE	High	[R].AVVSNGIIK.[R]	2xTMT6plex [N-Term; K9]		FALSE	0.0142951	0.00117917	1	5	3	E9QPG8	E9QPG8 [1685-1693]	0	1358.88	High	High	High	High	High	High	High	High	High	High	0.241	0.489	0.32	0.583	1.2	0.805	1.236	1.91	1.606	327200	663500	434700	792400	1358000	1629000	1094000	1678000	2594000	2181000	3	3	3	3	3	3
FALSE	High	[R].QLGCGLAVSAPGSARFGQGTGPIVMDDVACGGYEDYLWR.[C]	1xTMT6plex [N-Term]; 1xDeamidated [Q18]; 1xPhospho [S9]; 2xCarbamidomethyl [C4; C30]	E9QPG8 1xPhospho [S511]; 1xPhospho [S1152]	FALSE	0.122986	0.00171593	1	5	1	E9QPG8	E9QPG8 [503-541]; [642-680]	1	4441.03	High	High	High	High	High	High	High	High	High	High
FALSE	High	[R].KDLNIHVSCK.[M]	3xTMT6plex [N-Term; K1; K10]; 1xCarbamidomethyl [C9]		FALSE	0.0215825	0.00171593	1	5	2	E9QPG8	E9QPG8 [1696-1705]	1	1901.12	High	High	High	High	High	High	High	High	High	High	0.547	0.771	0.793	1.938	1.012	2.635	1.24	3.958	1.899	107700	151900	156100	381600	197000	199400	518900	244200	779600	374100	1	1	1	1	1	1
FALSE	High	[R].SYLQSMGYSAR.[D]	1xTMT6plex [N-Term]; 1xOxidation [M6]		FALSE	0.0383932	0.00171593	1	5	3	E9QPG8	E9QPG8 [1625-1635]	0	1507.74	High	High	High	High	High	High	High	High	High	High	1.531	0.447	1.227	1.129	1.257	1.484	2.199	1.865	2.293	187400	54770	150200	138300	122400	153900	181700	269300	228300	280700	1	1	1	1	1	1
FALSE	High	[K].DLNIHVSCK.[M]	2xTMT6plex [N-Term; K9]; 1xCarbamidomethyl [C8]		FALSE	0.0870683	0.00171593	1	5	4	E9QPG8	E9QPG8 [1697-1705]	0	1543.87	High	High	High	High	High	High	High	High	High	High	1.057	1.108	1.201	1.372	1.148	1.494	1.089	2.047	1.383	706600	741100	803000	917300	668700	767900	998900	728500	1369000	924800	3	3	3	3	3	3
FALSE	High	[R].CSWEILVPNMNR.[V]	1xTMT6plex [N-Term]; 1xDeamidated [N9]; 1xCarbamidomethyl [C1]; 1xOxidation [M10]		FALSE	0.0193826	0.00171593	1	5	4	E9QPG8	E9QPG8 [1026-1037]; [1152-1163]	0	1764.86	High	High	High	High	High	High	High	High	High	High	1.025	2.341	0.948	0.707	1.223	0.83	1.509	1.88	1.732	228400	521600	211300	157500	222800	272400	184900	336100	418900	385900	3	3	3	3	3	3
FALSE	High	[R].FGQGSGPIVMDDVACGGYEDYLWR.[C]	1xTMT6plex [N-Term]; 1xDeamidated [Q3]; 1xCarbamidomethyl [C15]		FALSE	0.0181306	0.00171593	1	5	4	E9QPG8	E9QPG8 [92-115]	0	2922.33	High	High	High	High	High	High	High	High	High	High
FALSE	High	[R].CSWEILVPSMNR.[V]	1xTMT6plex [N-Term]; 1xCarbamidomethyl [C1]; 1xOxidation [M10]		FALSE	0.0954895	0.00171593	1	5	1	E9QPG8	E9QPG8 [1268-1279]	0	1736.87	High	High	High	High	High	High	High	High	High	High
FALSE	High	[R].FPSVYLQCK.[L]	2xTMT6plex [N-Term; K9]; 1xCarbamidomethyl [C8]		FALSE	0.0163408	0.00171593	1	5	11	E9QPG8	E9QPG8 [1832-1840]	0	1599.9	High	High	High	High	High	High	High	High	High	High	0.214	0.37	0.329	0.648	1.094	0.801	1.239	1.531	1.461	818200	1412000	1256000	2474000	3820000	4178000	3061000	4733000	5848000	5581000	8	8	8	8	8	8
FALSE	High	[K].FSSFHFLNR.[F]	1xTMT6plex [N-Term]		FALSE	0.0156867	0.00171593	1	5	2	E9QPG8	E9QPG8 [1823-1831]	0	1383.74	High	High	High	High	High	High	High	High	High	High	0.251	0.298	0.24	0.25	1.125	0.465	2.395	1.183	1.74	10360	12270	9877	10310	41220	46390	19180	98720	48750	71730	1	1	1	1	1	1
High	Master Protein	1082558	S41161 *CON* keratin 9, cytoskeletal - human gi435476 (Z29074) cytokeratin 9 [Homo sapiens]	TRUE	0	280.611	53.9326	24	207	23	1	623	62.092	5.3	High	High	High	High	High	High	High	High	High	High		3857		KRT9	17	cell organization and biogenesis	membrane;nucleus	structural molecule activity	Pf00038, Pf13166	2.797	0.531	1.195	0.664	0.857	0.617	0.958	1.12	0.792	76000000	14440000	32490000	18050000	27170000	23290000	16750000
Checked	Confidence	Annotated Sequence	Modifications	Modifications in Master Proteins	Contaminant	Qvality PEP	Qvality q-value	# Protein Groups	# Proteins	# PSMs	Master Protein Accessions	Positions in Master Proteins	# Missed Cleavages	Theo. MH+ [Da]	Found in Sample: [S1] F1: 126, Sample	Found in Sample: [S2] F1: 127N, Sample	Found in Sample: [S3] F1: 127C, Sample	Found in Sample: [S4] F1: 128N, Sample	Found in Sample: [S5] F1: 128C, Control	Found in Sample: [S6] F1: 129N, Sample	Found in Sample: [S7] F1: 129C, Sample	Found in Sample: [S8] F1: 130N, Sample	Found in Sample: [S9] F1: 130C, Sample	Found in Sample: [S10] F1: 131, Sample	Abundance Ratio: (F1, 126) / (F1, 128C)	Abundance Ratio: (F1, 127N) / (F1, 128C)	Abundance Ratio: (F1, 127C) / (F1, 128C)	Abundance Ratio: (F1, 128N) / (F1, 128C)	Abundance Ratio: (F1, 129N) / (F1, 128C)	Abundance Ratio: (F1, 129C) / (F1, 128C)	Abundance Ratio: (F1, 130N) / (F1, 128C)	Abundance Ratio: (F1, 130C) / (F1, 128C)	Abundance Ratio: (F1, 131) / (F1, 128C)	Abundance: F1: 126, Sample	Abundance: F1: 127N, Sample	Abundance: F1: 127C, Sample	Abundance: F1: 128N, Sample	Abundance: F1: 128C, Control	Abundance: F1: 129N, Sample	Abundance: F1: 129C, Sample	Abundance: F1: 130N, Sample	Abundance: F1: 130C, Sample	Abundance: F1: 131, Sample	Abundances Count: F1: 126, Sample	Abundances Count: F1: 127N, Sample	Abundances Count: F1: 127C, Sample	Abundances Count: F1: 128N, Sample	Abundances Count: F1: 128C, Control	Abundances Count: F1: 129N, Sample
FALSE	High	[R].QVLDNLTMEK.[S]	2xTMT6plex [N-Term; K10]		TRUE	0.00261655	0	1	4	1	1082558	1082558 [262-271]	0	1648.93	High	High	High	High	High	High	High	High	High	High
FALSE	High	[K].VQALEEANNDLENK.[I]	2xTMT6plex [N-Term; K14]		TRUE	4.22032e-06	0	1	4	12	1082558	1082558 [171-184]	0	2045.09	High	High	High	High	High	High	High	High	High	High	3.161	0.378	1.095	0.656	0.822	0.558	0.868	1.151	0.589	6895000	824900	2388000	1430000	2181000	1792000	1216000	1893000	2511000	1286000	12	12	12	12	12	12
FALSE	High	[K].DIENQYETQITQIEHEVSSSGQEVQSSAK.[E]	2xTMT6plex [N-Term; K29]; 2xDeamidated [Q22; Q25]		TRUE	1.53619e-06	0	1	4	1	1082558	1082558 [340-368]	0	3724.81	High	High	High	High	High	High	High	High	High	High	8.32	1.294	2.871	2.034	1.031	0.745	0.69	1.072	0.944	173300	26950	59800	42360	20830	21470	15520	14370	22320	19660	1	1	1	1	1	1
FALSE	High	[K].DIENQYETQITQIEHEVSSSGQEVQSSAK.[E]	2xTMT6plex [N-Term; K29]; 1xDeamidated [Q]		TRUE	3.72081e-08	0	1	4	7	1082558	1082558 [340-368]	0	3723.82	High	High	High	High	High	High	High	High	High	High	12.623	0.87	3.118	1.85	0.871	0.682	0.79	1.265	1.156	276400	19060	68260	40510	21900	19080	14930	17300	27690	25320	1	1	1	1	1	1
FALSE	High	[K].DIENQYETQITQIEHEVSSSGQEVQSSAK.[E]	2xTMT6plex [N-Term; K29]		TRUE	6.21354e-08	0	1	4	6	1082558	1082558 [340-368]	0	3722.84	High	High	High	High	High	High	High	High	High	High	8.517	1.057	2.608	1.574	1.034	0.733	0.814	1.304	1.291	575600	71430	176200	106400	67580	69880	49520	55020	88120	87220	3	3	3	3	3	3
FALSE	High	[R].QEYEQLIAK.[N]	2xTMT6plex [N-Term; K9]		TRUE	0.00874541	0	1	4	10	1082558	1082558 [328-336]	0	1579.91	High	High	High	High	High	High	High	High	High	High	3.71	0.535	1.232	0.628	0.994	0.518	1.054	0.781	0.879	9113000	1314000	3025000	1543000	2456000	2441000	1271000	2588000	1918000	2159000	5	5	5	5	5	5
FALSE	High	[R].QEIECQNQEYSLLLSIK.[M]	2xTMT6plex [N-Term; K17]; 1xCarbamidomethyl [C5]		TRUE	4.89878e-05	0	1	3	2	1082558	1082558 [428-444]	0	2553.36	High	High	High	High	High	High	High	High	High	High	0.745	1.004	4.678	1.936	1.052	1.406	0.959	2.125	1.207	75880	102300	476600	197200	101900	107200	143200	97700	216500	123000	2	2	2	2	2	2
FALSE	High	[R].HGVQELEIELQSQLSK.[K]	2xTMT6plex [N-Term; K16]		TRUE	2.11818e-05	0	1	3	12	1082558	1082558 [375-390]	0	2296.29	High	High	High	High	High	High	High	High	High	High	3.243	0.443	1.618	0.742	0.762	0.566	0.863	1.25	0.664	2911000	397700	1453000	665900	897600	684100	508000	775100	1122000	596500	8	8	8	8	8	8
FALSE	High	[K].EIETYHNLLEGGQEDFESSGAGK.[I]	2xTMT6plex [N-Term; K23]; 1xDeamidated [Q/N]		TRUE	3.17748e-07	0	1	3	4	1082558	1082558 [450-472]	0	2969.44	High	High	High	High	High	High	High	High	High	High	1.142	0.504	1.477	0.809	1.053	0.737	1.077	1.167	0.967	239800	105900	310300	169900	210100	221200	154900	226200	245100	203100	2	2	2	2	2	2
FALSE	High	[K].EIETYHNLLEGGQEDFESSGAGK.[I]	2xTMT6plex [N-Term; K23]		TRUE	3.93315e-07	0	1	3	8	1082558	1082558 [450-472]	0	2968.46	High	High	High	High	High	High	High	High	High	High	1.258	0.245	1.739	0.786	0.815	0.62	0.922	1.207	0.58	1375000	267700	1901000	858900	1093000	890800	677800	1008000	1320000	634100	8	8	8	8	8	8
FALSE	High	[K].SDLEMQYETLQEELMALK.[K]	2xTMT6plex [N-Term; K18]; 1xDeamidated [Q11]		TRUE	0.00210619	0	1	4	1	1082558	1082558 [272-289]	0	2630.33	High	High	High	High	High	High	High	High	High	High
FALSE	High	[K].SDLEMQYETLQEELMALK.[K]	2xTMT6plex [N-Term; K18]		TRUE	0.00079321	0	1	4	1	1082558	1082558 [272-289]	0	2629.35	High	High	High	High	High	High	High	High	High	High	2.887	0.561	2.244	1.43	0.687	0.715	0.371	0.793	0.566	88500	17200	68790	43850	30660	21050	21920	11360	24320	17370	1	1	1	1	1	1
FALSE	High	[K].SDLEMQYETLQEELMALK.[K]	2xTMT6plex [N-Term; K18]; 1xOxidation [M]		TRUE	9.86427e-05	0	1	4	7	1082558	1082558 [272-289]	0	2645.35	High	High	High	High	High	High	High	High	High	High	3.035	0.715	1.879	1.009	0.67	0.696	0.584	1.143	0.73	203200	47920	125800	67550	66980	44880	46600	39080	76530	48920	3	3	3	3	3	3
FALSE	High	[K].VQALEEANNDLENKIQDWYDK.[K]	3xTMT6plex [N-Term; K14; K21]		TRUE	0.000102405	0	1	4	2	1082558	1082558 [171-191]	1	3222.69	High	High	High	High	High	High	High	High	High	High	2.631	0.705	1.084	1.652	0.698	0.917	0.517	0.719	0.808	70500	18880	29050	44260	26790	18710	24570	13860	19260	21650	1	1	1	1	1	1
FALSE	High	[K].SDLEMQYETLQEELMALK.[K]	2xTMT6plex [N-Term; K18]; 1xDeamidated [Q11]; 1xOxidation [M15]		TRUE	0.000434242	0	1	4	1	1082558	1082558 [272-289]	0	2646.33	High	High	High	High	High	High	High	High	High	High
FALSE	High	[K].SDLEMQYETLQEELMALK.[K]	2xTMT6plex [N-Term; K18]; 2xOxidation [M5; M15]		TRUE	6.99062e-05	0	1	4	11	1082558	1082558 [272-289]	0	2661.34	High	High	High	High	High	High	High	High	High	High	1.705	0.523	1.3	0.507	0.854	0.693	0.675	1.376	0.803	1029000	315700	784200	306000	603400	515100	418200	407500	830200	484900	9	9	9	9	9	9
FALSE	High	[R].GGSGGSHGGGSGFGGESGGSYGGGEEASGSGGGYGGGSGK.[S]	2xTMT6plex [N-Term; K40]		TRUE	1.39378e-10	0	1	3	4	1082558	1082558 [580-619]	0	3681.61	High	High	High	High	High	High	High	High	High	High	1.81	0.403	0.399	0.629	1.076	0.813	2.076	1.222	1.028	163000	36260	35910	56630	90060	96870	73230	186900	110000	92590	2	2	2	2	2	2
FALSE	High	[K].SDLEMQYETLQEELMALK.[K]	2xTMT6plex [N-Term; K18]; 1xDeamidated [Q]; 2xOxidation [M5; M15]		TRUE	0.00103847	0	1	4	3	1082558	1082558 [272-289]	0	2662.32	High	High	High	High	High	High	High	High	High	High	1.634	0.789	1.443	0.542	0.786	0.533	0.546	0.985	0.621	88970	42970	78590	29520	54460	42800	29030	29730	53630	33810	2	2	2	2	2	2
FALSE	High	[R].QGVDADINGLR.[Q]	1xTMT6plex [N-Term]; 1xDeamidated [N8]		TRUE	0.00787841	0	1	4	5	1082558	1082558 [251-261]	0	1387.74	High	High	High	High	High	High	High	High	High	High	2.236	0.428	0.913	0.496	1.256	0.793	1.458	1.301	1.764	1250000	239400	510400	277300	559100	702300	443300	815200	727600	986300	1	1	1	1	1	1
FALSE	High	[R].QGVDADINGLR.[Q]	1xTMT6plex [N-Term]		TRUE	0.0008645	0	1	4	6	1082558	1082558 [251-261]	0	1386.75	High	High	High	High	High	High	High	High	High	High	1.126	0.676	0.652	0.553	0.74	0.445	0.756	0.767	0.668	5147000	3089000	2979000	2526000	4570000	3384000	2032000	3455000	3505000	3052000	5	5	5	5	5	5
FALSE	High	[R].SGGGGGGGLGSGGSIR.[S]	1xTMT6plex [N-Term]		TRUE	5.27957e-05	0	1	2	4	1082558	1082558 [14-29]	0	1461.76	High	High	High	High	High	High	High	High	High	High	3.093	1.106	0.747	0.782	0.877	0.679	1.437	1.042	0.616	955800	341700	230800	241700	309000	271000	209800	444000	321900	190200	2	2	2	2	2	2
FALSE	High	[R].GGSGGSYGGGGSGGGYGGGSGSR.[G]	1xTMT6plex [N-Term]		TRUE	7.96502e-10	0	1	3	7	1082558	1082558 [491-513]	0	2020.89	High	High	High	High	High	High	High	High	High	High	1.808	0.904	0.409	0.541	0.996	0.565	1.578	1.086	1.028	1050000	524800	237500	314200	580600	578300	327900	916100	630400	597100	6	6	6	6	6	6
FALSE	High	[K].NYSPYYNTIDDLKDQIVDLTVGNNK.[T]	3xTMT6plex [N-Term; K13; K25]		TRUE	0.000434242	0	1	4	2	1082558	1082558 [200-224]	1	3589.9	High	High	High	High	High	High	High	High	High	High	3.284	0.834	4.545	1.893	0.577	0.941	0.307	1.361	0.656	94480	23990	130800	54460	28770	16600	27080	8827	39150	18870	2	2	2	2	2	2
FALSE	High	[R].YCGQLQMIQEQISNLEAQITDVR.[Q]	1xTMT6plex [N-Term]; 1xDeamidated [Q/N]; 1xCarbamidomethyl [C2]; 1xOxidation [M7]		TRUE	3.84332e-06	0	1	3	8	1082558	1082558 [405-427]	0	2983.47	High	High	High	High	High	High	High	High	High	High	3.4	0.01	3.18	1.296	1.07	1.037	1.063	0.01	1.435	7542		7055	2875	2218	2374	2300	2358		3184	1		1	1	1	1
FALSE	High	[R].YCGQLQMIQEQISNLEAQITDVR.[Q]	1xTMT6plex [N-Term]; 1xCarbamidomethyl [C2]; 1xOxidation [M7]		TRUE	2.73389e-06	0	1	3	6	1082558	1082558 [405-427]	0	2982.49	High	High	High	High	High	High	High	High	High	High	6.878	4.387	6.703	1.871	1.289	0.537	0.01	0.748	1.062	67850	43270	66110	18460	9864	12710	5296		7374	10470	4	4	4	3	2	2
FALSE	High	[R].YCGQLQMIQEQISNLEAQITDVR.[Q]	1xTMT6plex [N-Term]; 1xDeamidated [Q/N]; 1xCarbamidomethyl [C2]		TRUE	2.55576e-06	0	1	3	10	1082558	1082558 [405-427]	0	2967.48	High	High	High	High	High	High	High	High	High	High	3.635	2.143	3.102	1.398	2.921	0.873	0.746	1.567	2.469	40910	24120	34920	15730	11260	32880	9826	8400	17640	27790	3	3	3	2	3	3
FALSE	High	[R].YCGQLQMIQEQISNLEAQITDVR.[Q]	1xTMT6plex [N-Term]; 1xCarbamidomethyl [C2]		TRUE	1.95932e-06	0	1	3	5	1082558	1082558 [405-427]	0	2966.49	High	High	High	High	High	High	High	High	High	High	1.853	1.273	1.404	0.862	1.617	0.599	0.504	0.643	1.259	36860	25320	27920	17140	19890	32150	11910	10020	12790	25030	3	3	3	3	3	3
FALSE	High	[R].FSSSSGYGGGSSR.[V]	1xTMT6plex [N-Term]		TRUE	0.00140085	0	1	3	6	1082558	1082558 [47-59]	0	1464.69	High	High	High	High	High	High	High	High	High	High	2.287	1.089	0.806	0.634	0.986	0.676	1.275	1.193	0.927	1747000	832200	615700	484200	764200	753300	516700	974700	911700	708000	5	5	5	5	5	5
FALSE	High	[K].SDLEMQYETLQEELMALKK.[N]	3xTMT6plex [N-Term; K18; K19]; 1xDeamidated [Q11]; 2xOxidation [M5; M15]		TRUE	0.000349513	0	1	4	1	1082558	1082558 [272-290]	1	3019.58	High	High	High	High	High	High	High	High	High	High
FALSE	High	[K].SDLEMQYETLQEELMALKK.[N]	3xTMT6plex [N-Term; K18; K19]; 2xOxidation [M5; M15]		TRUE	2.51616e-05	0	1	4	10	1082558	1082558 [272-290]	1	3018.6	High	High	High	High	High	High	High	High	High	High	3.702	0.442	1.833	0.917	0.397	0.667	0.408	0.566	0.342	1547000	184700	766100	383200	418000	165900	278700	170700	236400	143200	7	7	7	7	7	7
FALSE	High	[K].SDLEMQYETLQEELMALKK.[N]	3xTMT6plex [N-Term; K18; K19]; 1xOxidation [M]		TRUE	7.3667e-05	0	1	4	4	1082558	1082558 [272-290]	1	3002.6	High	High	High	High	High	High	High	High	High	High	2.665	0.808	1.405	1.125	0.641	0.598	0.64	0.687	0.736	228500	69220	120500	96480	85720	54960	51280	54870	58890	63110	3	3	3	3	3	3
FALSE	High	[K].SDLEMQYETLQEELMALKK.[N]	3xTMT6plex [N-Term; K18; K19]; 1xDeamidated [Q11]; 1xOxidation [M15]		TRUE	0.000260052	0	1	4	1	1082558	1082558 [272-290]	1	3003.59	High	High	High	High	High	High	High	High	High	High	4.5	2.184	1.656	1.161	0.694	0.803	0.809	0.934	0.666	109500	53120	40270	28250	24320	16880	19530	19670	22710	16200	1	1	1	1	1	1
FALSE	High	[K].STMQELNSR.[L]	1xTMT6plex [N-Term]		TRUE	0.0176003	0.00171593	1	3	6	1082558	1082558 [155-163]	0	1294.66	High	High	High	High	High	High	High	High	High	High	2.061	0.399	0.528	0.438	1.164	0.656	1.528	1.203	1.598	2424000	469300	621600	515000	1176000	1369000	772000	1797000	1416000	1880000	2	2	2	2	2	2
FALSE	High	[K].FEMEQNLR.[Q]	1xTMT6plex [N-Term]		TRUE	0.0471351	0.00171593	1	4	4	1082558	1082558 [243-250]	0	1295.66	High	High	High	High	High	High	High	High	High	High	2.671	0.389	0.919	0.614	0.978	0.538	1.041	1.069	0.656	2137000	311100	735500	491200	800400	783000	430200	833500	855300	524900	1	1	1	1	1	1
FALSE	High	[K].KGPAAIQK.[N]	3xTMT6plex [N-Term; K1; K8]		TRUE	0.0171489	0.00171593	1	4	5	1082558	1082558 [192-199]	1	1499.99	High	High	High	High	High	High	High	High	High	High	7.137	0.524	1.989	1.159	0.678	1.12	0.837	1.527	0.667	21630000	1587000	6026000	3512000	3031000	2055000	3394000	2535000	4627000	2023000	2	2	2	2	2	2
FALSE	High	[R].QVLDNLTMEK.[S]	2xTMT6plex [N-Term; K10]; 1xOxidation [M8]		TRUE	0.0283813	0.00171593	1	4	8	1082558	1082558 [262-271]	0	1664.93	High	High	High	High	High	High	High	High	High	High	1.6	0.383	1.648	0.463	0.945	0.437	1.022	0.857	0.742	3725000	890800	3836000	1078000	2328000	2199000	1017000	2378000	1994000	1727000	5	5	5	5	5	5
FALSE	High	[K].IQDWYDKK.[G]	3xTMT6plex [N-Term; K7; K8]		TRUE	0.0816554	0.00171593	1	4	2	1082558	1082558 [185-192]	1	1783.04	High	High	High	High	High	High	High	High	High	High
FALSE	High	[K].TLLDIDNTR.[M]	1xTMT6plex [N-Term]		TRUE	0.0161598	0.00171593	1	4	3	1082558	1082558 [225-233]	0	1289.73	High	High	High	High	High	High	High	High	High	High	2.12	0.754	1.218	0.547	0.785	0.519	0.923	0.922	0.776	4012000	1427000	2305000	1036000	1893000	1486000	982800	1747000	1745000	1469000	3	3	3	3	3	3
FALSE	High	[K].IQDWYDK.[K]	2xTMT6plex [N-Term; K7]		TRUE	0.154513	0.00250807	1	4	4	1082558	1082558 [185-191]	0	1425.78	High	High	High	High	High	High	High	High	High	High	2.466	0.264	0.838	0.512	0.905	0.589	0.947	1.783	0.839	6513000	698000	2213000	1354000	2641000	2390000	1557000	2502000	4709000	2217000	2	2	2	2	2	2
FALSE	High	[R].LASYLDK.[V]	2xTMT6plex [N-Term; K7]		TRUE	0.165448	0.00332358	4	30	7	119581085; 88042; 125080; 1082558	119581085 [157-163]; 88042 [28-34]; 125080 [126-132]; 1082558 [164-170]	0	1267.77	High	High	High	High	High	High	High	High	High	High	0.895	0.046	0.582	0.374	0.577	0.524	0.467	0.901	0.292	46260000	2385000	30060000	19330000	51690000	29840000	27090000	24130000	46570000	15090000	3	3	3	3	3	3
High	Master Protein	P00761	*CON* Trypsin precursor - sus scrofa - includes MSPRL added real and artificial sequences to mimic mass of Promega trypsin modifications	TRUE	0	271.571	41.5655	15	618	12	1	741	79.407	8.31	High	High	High	High	High	High	High	High	High	High										2.688	2.132	3.251	1.854	0.43	0.942	0.252	0.395	0.261	858300000	680700000	1038000000	591900000	319300000	137400000	300700000
Checked	Confidence	Annotated Sequence	Modifications	Modifications in Master Proteins	Contaminant	Qvality PEP	Qvality q-value	# Protein Groups	# Proteins	# PSMs	Master Protein Accessions	Positions in Master Proteins	# Missed Cleavages	Theo. MH+ [Da]	Found in Sample: [S1] F1: 126, Sample	Found in Sample: [S2] F1: 127N, Sample	Found in Sample: [S3] F1: 127C, Sample	Found in Sample: [S4] F1: 128N, Sample	Found in Sample: [S5] F1: 128C, Control	Found in Sample: [S6] F1: 129N, Sample	Found in Sample: [S7] F1: 129C, Sample	Found in Sample: [S8] F1: 130N, Sample	Found in Sample: [S9] F1: 130C, Sample	Found in Sample: [S10] F1: 131, Sample	Abundance Ratio: (F1, 126) / (F1, 128C)	Abundance Ratio: (F1, 127N) / (F1, 128C)	Abundance Ratio: (F1, 127C) / (F1, 128C)	Abundance Ratio: (F1, 128N) / (F1, 128C)	Abundance Ratio: (F1, 129N) / (F1, 128C)	Abundance Ratio: (F1, 129C) / (F1, 128C)	Abundance Ratio: (F1, 130N) / (F1, 128C)	Abundance Ratio: (F1, 130C) / (F1, 128C)	Abundance Ratio: (F1, 131) / (F1, 128C)	Abundance: F1: 126, Sample	Abundance: F1: 127N, Sample	Abundance: F1: 127C, Sample	Abundance: F1: 128N, Sample	Abundance: F1: 128C, Control	Abundance: F1: 129N, Sample	Abundance: F1: 129C, Sample	Abundance: F1: 130N, Sample	Abundance: F1: 130C, Sample	Abundance: F1: 131, Sample	Abundances Count: F1: 126, Sample	Abundances Count: F1: 127N, Sample	Abundances Count: F1: 127C, Sample	Abundances Count: F1: 128N, Sample	Abundances Count: F1: 128C, Control	Abundances Count: F1: 129N, Sample
FALSE	High	[KR].LGEHNINVLEGNEQFVNSAK.[LI]	2xTMT6plex [N-Term; K20]		TRUE	1.31272e-06	0	1	3	6	P00761	P00761 [522-541]	0	2670.43	High	High	High	High	High	High	High	High	High	High	2.517	3.975	1.097	1.106	1.829	0.67	1.433	1.785	1.823	759700	1200000	331000	333700	301800	551900	202200	432600	538800	550300	3	3	3	3	3	3
FALSE	High	[KR].LGEHNINVLEGNEQFVNSAK.[LI]	2xTMT6plex [N-Term; K20]; 1xDeamidated [N]		TRUE	2.95936e-07	0	1	3	30	P00761	P00761 [522-541]	0	2671.41	High	High	High	High	High	High	High	High	High	High	6.041	6.476	2.879	3.694	1.311	1.8	0.818	3.363	2.16	11530000	12360000	5493000	7049000	1908000	2502000	3434000	1562000	6417000	4121000	19	19	19	19	19	19
FALSE	High	[KR].LGEHNINVLEGNEQFVNSAK.[LI]	2xTMT6plex [N-Term; K20]; 2xDeamidated [N7; N12]		TRUE	0.000469745	0	1	3	3	P00761	P00761 [522-541]	0	2672.39	High	High	High	High	High	High	High	High	High	High	0.76	1.08	0.996	0.814	1.521	1.267	1.129	1.704	1.53	78710	111800	103100	84310	103600	157500	131200	116900	176500	158500	2	2	2	2	2	2
FALSE	High	[KR].LGEHNINVLEGNEQFVNSAK.[LI]	2xTMT6plex [N-Term; K20]; 3xDeamidated [N7; N12; N17]		TRUE	4.56249e-05	0	1	3	1	P00761	P00761 [522-541]	0	2673.38	High	High	High	High	High	High	High	High	High	High
FALSE	High	[R].IITHPNFNGNTLDNDIMLIRLSSPATLDSR.[S]	1xTMT6plex [N-Term]; 2xDeamidated [N]; 1xOxidation [M17]		TRUE	0.00186855	0	1	1	3	P00761	P00761 [660-689]	1	3585.84	High	High	High	High	High	High	High	High	High	High
FALSE	High	[R].IITHPNFNGNTLDNDIMLIRLSSPATLDSR.[S]	1xTMT6plex [N-Term]; 1xDeamidated [N]; 1xOxidation [M17]		TRUE	0.00419144	0	1	1	2	P00761	P00761 [660-689]	1	3584.86	High	High	High	High	High	High	High	High	High	High	1.472	1.247	2.082	1.185	0.792	0.509	0.451	0.916	1.061	37220	31530	52670	29990	25290	20030	12880	11400	23180	26840	1	1	1	1	1	1
FALSE	High	[R].IITHPNFNGNTLDNDIMLIRLSSPATLDSR.[S]	1xTMT6plex [N-Term]; 1xDeamidated [N8]		TRUE	7.31176e-05	0	1	1	2	P00761	P00761 [660-689]	1	3568.86	High	High	High	High	High	High	High	High	High	High	1.458	1.136	2.864	1.309	0.695	0.552	0.608	0.573	0.866	66040	51490	129800	59310	45310	31510	25000	27550	25950	39220	1	1	1	1	1	1
FALSE	High	[K].SSGSSYPSLLQCLK.[A]	2xTMT6plex [N-Term; K14]; 1xCarbamidomethyl [C12]		TRUE	1.03242e-05	0	1	1	8	P00761	P00761 [134-147]	0	1985.08	High	High	High	High	High	High	High	High	High	High	1.212	0.927	1.713	0.845	1.455	1.893	1.187	1.978	1.53	946200	723900	1337000	659300	780700	1136000	1478000	926600	1544000	1194000	7	7	7	7	7	7
FALSE	High	[KR].IITHPNFNGNTLDNDIMLIK.[L]	2xTMT6plex [N-Term; K20]; 1xOxidation [M17]		TRUE	1.26449e-06	0	1	2	35	P00761	P00761 [78-97]; [343-362]; [562-581]	0	2757.5	High	High	High	High	High	High	High	High	High	High	1.359	1.251	1.568	1.135	0.885	1.463	0.697	1.62	1.06	2837000	2612000	3274000	2369000	2087000	1847000	3053000	1454000	3382000	2213000	25	25	25	25	25	25
FALSE	High	[KR].IITHPNFNGNTLDNDIMLIK.[L]	2xTMT6plex [N-Term; K20]; 1xDeamidated [N]; 1xOxidation [M17]		TRUE	5.169e-07	0	1	2	48	P00761	P00761 [78-97]; [343-362]; [562-581]	0	2758.48	High	High	High	High	High	High	High	High	High	High	1.544	1.375	1.753	1.188	0.935	1.541	0.804	1.7	1.07	3855000	3432000	4377000	2967000	2497000	2335000	3847000	2007000	4245000	2671000	25	25	25	25	25	25
FALSE	High	[KR].IITHPNFNGNTLDNDIMLIK.[L]	2xTMT6plex [N-Term; K20]; 3xDeamidated [N8; N10; N]		TRUE	0.000115435	0	1	2	4	P00761	P00761 [78-97]; [343-362]; [562-581]	0	2744.46	High	High	High	High	High	High	High	High	High	High	1.817	1.788	2.135	1.481	1.058	1.942	0.639	1.864	0.992	94930	93400	111600	77380	52250	55290	101500	33410	97400	51860	1	1	1	1	1	1
FALSE	High	[KR].IITHPNFNGNTLDNDIMLIK.[L]	2xTMT6plex [N-Term; K20]; 2xDeamidated [N]		TRUE	1.05586e-05	0	1	2	16	P00761	P00761 [78-97]; [343-362]; [562-581]	0	2743.47	High	High	High	High	High	High	High	High	High	High	1.919	1.673	2.123	1.707	0.821	1.992	0.636	1.757	1.041	1024000	892500	1132000	910700	533400	437900	1063000	339000	937100	555400	8	8	8	8	8	8
FALSE	High	[KR].IITHPNFNGNTLDNDIMLIK.[L]	2xTMT6plex [N-Term; K20]; 1xDeamidated [N]		TRUE	1.86049e-07	0	1	2	53	P00761	P00761 [78-97]; [343-362]; [562-581]	0	2742.49	High	High	High	High	High	High	High	High	High	High	1.847	1.569	2.102	1.523	0.706	2.039	0.496	1.823	0.921	8501000	7222000	9676000	7012000	4604000	3251000	9389000	2285000	8391000	4239000	31	31	31	31	31	31
FALSE	High	[KR].IITHPNFNGNTLDNDIMLIK.[L]	2xTMT6plex [N-Term; K20]		TRUE	0.000110779	0	1	2	17	P00761	P00761 [78-97]; [343-362]; [562-581]	0	2741.51	High	High	High	High	High	High	High	High	High	High	1.422	1.238	1.713	1.18	0.758	1.549	0.495	1.36	0.837	2862000	2492000	3447000	2375000	2012000	1526000	3118000	996000	2737000	1685000	8	8	8	8	8	8
FALSE	High	[R].SCAAAGTECLISGWGNTK.[S]	2xTMT6plex [N-Term; K18]; 2xCarbamidomethyl [C2; C9]		TRUE	0.00474161	0	1	1	1	P00761	P00761 [116-133]	0	2341.17	High	High	High	High	High	High	High	High	High	High
FALSE	High	[R].SCAAAGTECLISGWGNTK.[S]	2xTMT6plex [N-Term; K18]; 1xDeamidated [N16]; 2xCarbamidomethyl [C2; C9]		TRUE	0.00686261	0	1	1	1	P00761	P00761 [116-133]	0	2342.15	High	High	High	High	High	High	High	High	High	High
FALSE	High	[KR-].LGEHNIDVLEGNEQFINAAR.[I]	1xTMT6plex [N-Term]		TRUE	0.00528422	0	2	3	2	P00761; PromTArt5	P00761 [323-342]; [542-561]; [640-659]; PromTArt5 [1-20]	0	2468.27	High	High	High	High	High	High	High	High	High	High
FALSE	High	[R].LGEHNIDVLEGNEQFINAAK.[I]	2xTMT6plex [N-Term; K20]		TRUE	4.41991e-08	0	1	1	71	P00761	P00761 [58-77]	0	2669.43	High	High	High	High	High	High	High	High	High	High	2.616	2.037	3.14	2.051	0.543	2.366	0.335	1.168	0.475	52390000	40800000	62890000	41090000	20030000	10870000	47390000	6703000	23400000	9510000	51	51	51	51	51	51
FALSE	High	[R].LGEHNIDVLEGNEQFINAAK.[I]	2xTMT6plex [N-Term; K20]; 1xDeamidated [N/Q]		TRUE	2.98352e-08	0	1	1	62	P00761	P00761 [58-77]	0	2670.41	High	High	High	High	High	High	High	High	High	High	1.956	1.76	2.353	1.705	0.831	1.967	0.614	1.654	1.004	7158000	6438000	8608000	6239000	3659000	3039000	7196000	2248000	6050000	3673000	25	25	25	25	25	25
FALSE	High	[R].LGEHNIDVLEGNEQFINAAK.[I]	2xTMT6plex [N-Term; K20]; 2xDeamidated [Q/N]		TRUE	6.71298e-06	0	1	1	11	P00761	P00761 [58-77]	0	2671.4	High	High	High	High	High	High	High	High	High	High	0.895	0.985	1.104	1.062	0.925	0.992	1.337	1.432	1.17	199300	219300	245900	236600	222700	206000	221000	297700	318900	260600	3	3	3	3	3	3
FALSE	High	[R].LGEHNIDVLEGNEQFINAAK.[I]	2xTMT6plex [N-Term; K20]; 3xDeamidated [N12; Q14; N17]		TRUE	0.00237404	0	1	1	1	P00761	P00761 [58-77]	0	2672.38	High	High	High	High	High	High	High	High	High	High	0.804	0.628	0.837	0.918	0.469	0.325	0.23	0.417	0.439	25670	20050	26750	29340	31950	14980	10390	7350	13320	14010	1	1	1	1	1	1
FALSE	High	[R-].LGEHNIDVLEGNEQFINAARIITHPNFNGNTLDNDIMLIR.[L]	1xTMT6plex [N-Term]; 1xDeamidated [Q/N]		TRUE	0.00140085	0	2	2	7	P00761; PromTArt5	P00761 [640-679]; PromTArt5 [1-40]	1	4761.43	High	High	High	High	High	High	High	High	High	High
FALSE	High	[KR].LGEHNIDVLEGNEQFINAARIITHPNFNGNTLDNDIMLIK.[L]	2xTMT6plex [N-Term; K40]; 2xDeamidated [N]; 1xOxidation [M37]		TRUE	0.002656	0	1	2	3	P00761	P00761 [323-362]; [542-581]	1	4979.56	High	High	High	High	High	High	High	High	High	Not Found
FALSE	High	[KR].LGEHNIDVLEGNEQFINAARIITHPNFNGNTLDNDIMLIK.[L]	2xTMT6plex [N-Term; K40]; 1xDeamidated [N/Q]; 1xOxidation [M37]		TRUE	7.14939e-05	0	1	2	40	P00761	P00761 [323-362]; [542-581]	1	4978.58	High	High	High	High	High	High	High	High	High	High	5.199	3.076	5.282	2.88	0.575	1.081	0.222	0.501	0.283	615800	364400	625700	341100	118500	68130	128100	26330	59390	33530	7	7	7	7	7	7
FALSE	High	[KR].LGEHNIDVLEGNEQFINAARIITHPNFNGNTLDNDIMLIK.[L]	2xTMT6plex [N-Term; K40]; 1xOxidation [M37]		TRUE	0.000439144	0	1	2	17	P00761	P00761 [323-362]; [542-581]	1	4977.59	High	High	High	High	High	High	High	High	High	High	3.696	2.791	4.006	2.283	0.71	0.802	0.11	0.484	0.437	400300	302200	433900	247200	108300	76870	86810	11870	52450	47370	7	7	7	7	7	7
FALSE	High	[KR].LGEHNIDVLEGNEQFINAARIITHPNFNGNTLDNDIMLIK.[L]	2xTMT6plex [N-Term; K40]; 3xDeamidated [N28; N]		TRUE	6.29506e-05	0	1	2	3	P00761	P00761 [323-362]; [542-581]	1	4964.55	High	High	High	High	High	High	High	High	High	High
FALSE	High	[KR].LGEHNIDVLEGNEQFINAARIITHPNFNGNTLDNDIMLIK.[L]	2xTMT6plex [N-Term; K40]; 2xDeamidated [N/Q]		TRUE	6.75905e-05	0	1	2	5	P00761	P00761 [323-362]; [542-581]	1	4963.57	High	High	High	High	High	High	High	High	High	High	3.83	2.359	4.012	2.392	0.752	1.064	0.288	0.752	0.471	83840	51640	87820	52360	21890	16450	23280	6314	16460	10310	2	2	2	2	2	2
FALSE	High	[KR].LGEHNIDVLEGNEQFINAARIITHPNFNGNTLDNDIMLIK.[L]	2xTMT6plex [N-Term; K40]; 1xDeamidated [N/Q]		TRUE	7.50587e-05	0	1	2	57	P00761	P00761 [323-362]; [542-581]	1	4962.58	High	High	High	High	High	High	High	High	High	High	5.156	3.717	5.654	3.287	0.53	1.306	0.049	0.51	0.262	1535000	1107000	1683000	978600	297700	157900	388900	14640	151800	77900	11	11	11	11	11	11
FALSE	High	[KR].LGEHNIDVLEGNEQFINAARIITHPNFNGNTLDNDIMLIK.[L]	2xTMT6plex [N-Term; K40]		TRUE	5.90698e-05	0	1	2	3	P00761	P00761 [323-362]; [542-581]	1	4961.6	High	High	High	High	High	High	High	High	High	High	3.381	2.433	4.129	2.3	0.665	1.246	0.216	0.595	0.522	340200	244800	415600	231500	100600	66940	125400	21770	59890	52510	3	3	3	3	3	3
FALSE	High	[KR].IITHPNFNGNTLDNDIMLIKLSSPATLNSR.[VQ]	2xTMT6plex [N-Term; K20]; 1xOxidation [M17]		TRUE	0.00209049	0	1	2	4	P00761	P00761 [78-107]; [343-372]; [562-591]	1	3784.05	High	High	High	High	High	High	High	High	High	High	2.859	2.64	4.275	2.404	1.961	0.716	0.611	0.834	1.849	12910	11920	19310	10860	4516	8857	3236	2758	3768	8352	1	1	1	1	1	1
FALSE	High	[KR].IITHPNFNGNTLDNDIMLIKLSSPATLNSR.[VQ]	2xTMT6plex [N-Term; K20]; 1xDeamidated [N]; 1xOxidation [M17]		TRUE	0.00333668	0	1	2	4	P00761	P00761 [78-107]; [343-372]; [562-591]	1	3785.03	High	High	High	High	High	High	High	High	High	High	3.511	3.051	3.681	2.899	1.582	1.615	0.525	2.719	1.447	53370	46370	55950	44060	15200	24050	24550	7979	41330	22000	2	2	2	2	2	2
FALSE	High	[KR].IITHPNFNGNTLDNDIMLIK.[L]	2xTMT6plex [N-Term; K20]; 2xDeamidated [N10; N]; 1xOxidation [M17]		TRUE	0.0122735	0.00117917	1	2	3	P00761	P00761 [78-97]; [343-362]; [562-581]	0	2759.47	High	High	High	High	High	High	High	High	High	High	1.033	1.05	1.418	0.894	1.211	1.337	1.045	1.649	1.275	37400	38020	51330	32380	36200	43850	48420	37830	59700	46170	1	1	1	1	1	1
FALSE	High	[KR].IITHPNFNGNTLDNDIMLIKLSSPATLNSR.[VQ]	2xTMT6plex [N-Term; K20]; 2xDeamidated [N8; N10]; 1xOxidation [M17]		TRUE	0.069738	0.00171593	1	2	1	P00761	P00761 [78-107]; [343-372]; [562-591]	1	3786.01	High	High	High	High	High	High	High	High	High	High
FALSE	High	[KR].IITHPNFNGNTLDNDIMLIKLSSPATLNSR.[VQ]	2xTMT6plex [N-Term; K20]; 3xDeamidated [N8; N10; N14]; 1xOxidation [M17]		TRUE	0.126021	0.00171593	1	2	1	P00761	P00761 [78-107]; [343-372]; [562-591]	1	3787	High	High	High	High	High	High	High	High	High	High
FALSE	High	[R].LSSPATLDSR.[S]	1xTMT6plex [N-Term]		TRUE	0.0619098	0.00171593	1	1	6	P00761	P00761 [680-689]	0	1275.71	High	High	High	High	High	High	High	High	High	High
FALSE	High	[R-].LATVSLPR.[LV-]	1xTMT6plex [N-Term]		TRUE	0.0905417	0.00171593	1	3	2	P00761	P00761 [421-428]; [429-436]; [482-489]; [632-639]	0	1085.69	High	High	High	High	High	High	High	High	High	High	2.129	1.727	2.109	1.327	0.814	1.529	1.044	1.642	1.019	3289000	2667000	3258000	2050000	1545000	1257000	2362000	1613000	2537000	1574000	2	2	2	2	2	2
FALSE	High	[KR].LSSPATLNSR.[VQS]	1xTMT6plex [N-Term]		TRUE	0.0226474	0.00171593	2	3	8	P00761; PromTArt5	P00761 [98-107]; [363-372]; [582-591]; PromTArt5 [41-50]	0	1274.73	High	High	High	High	High	High	High	High	High	High	4.127	2.549	5.302	2.492	0.633	3.134	0.524	1.82	0.644	31070000	19190000	39910000	18760000	7528000	4767000	23590000	3946000	13700000	4846000	7	7	7	7	7	7
FALSE	High	[KR].LSSPATLNSR.[VQS]	1xTMT6plex [N-Term]; 1xDeamidated [N8]		TRUE	0.0619098	0.00171593	2	3	6	P00761; PromTArt5	P00761 [98-107]; [363-372]; [582-591]; PromTArt5 [41-50]	0	1275.71	High	High	High	High	High	High	High	High	High	High	2.45	2.296	2.083	1.207	0.961	1.151	0.984	0.839	0.976	8701000	8155000	7396000	4285000	3551000	3411000	4087000	3494000	2978000	3465000	5	5	5	5	5	5
FALSE	High	[KR].NKPGVYTK.[VN]	3xTMT6plex [N-Term; K2; K8]		TRUE	0.124278	0.00171593	1	4	7	P00761	P00761 [209-216]; [708-715]	0	1593.99	High	High	High	High	High	High	High	High	High	High	1.052	0.865	1.476	0.639	1.171	1.249	1.437	1.26	1.12	6128000	5039000	8598000	3722000	5827000	6822000	7279000	8372000	7345000	6529000	5	5	5	5	5	5
FALSE	High	[R].VATVSLPR.[S]	1xTMT6plex [N-Term]		TRUE	0.0541359	0.00171593	1	1	59	P00761	P00761 [108-115]	0	1071.67	High	High	High	High	High	High	High	High	High	High	2.766	2.174	3.384	1.882	0.37	0.769	0.187	0.211	0.161	753500000	592100000	921600000	512700000	272400000	100900000	209600000	50940000	57540000	43910000	50	50	50	50	50	50
FALSE	High	[KR].IITHPNFNGNTLDNDIMLIK.[L]	2xTMT6plex [N-Term; K20]; 3xDeamidated [N8; N10; N]; 1xOxidation [M17]		TRUE	0.036602	0.00171593	1	2	5	P00761	P00761 [78-97]; [343-362]; [562-581]	0	2760.45	High	High	High	High	High	High	High	High	High	High
High	Master Protein	119581085	keratin 10 (epidermolytic hyperkeratosis; keratosis palmaris et plantaris), isoform CRA_b [Homo sapiens]	TRUE	0	228.656	49.359	27	189	9	1	624	63.308	5.21	High	High	High	High	High	High	High	High	High	High		3858		KRT10	17	cell differentiation;response to stimulus	cytoplasm;membrane;nucleus	structural molecule activity	Pf00038, Pf04111	1.019	0.561	2.203	0.909	0.886	0.66	0.577	0.867	0.554	3188000	1755000	6896000	2843000	3130000	2774000	2065000
Checked	Confidence	Annotated Sequence	Modifications	Modifications in Master Proteins	Contaminant	Qvality PEP	Qvality q-value	# Protein Groups	# Proteins	# PSMs	Master Protein Accessions	Positions in Master Proteins	# Missed Cleavages	Theo. MH+ [Da]	Found in Sample: [S1] F1: 126, Sample	Found in Sample: [S2] F1: 127N, Sample	Found in Sample: [S3] F1: 127C, Sample	Found in Sample: [S4] F1: 128N, Sample	Found in Sample: [S5] F1: 128C, Control	Found in Sample: [S6] F1: 129N, Sample	Found in Sample: [S7] F1: 129C, Sample	Found in Sample: [S8] F1: 130N, Sample	Found in Sample: [S9] F1: 130C, Sample	Found in Sample: [S10] F1: 131, Sample	Abundance Ratio: (F1, 126) / (F1, 128C)	Abundance Ratio: (F1, 127N) / (F1, 128C)	Abundance Ratio: (F1, 127C) / (F1, 128C)	Abundance Ratio: (F1, 128N) / (F1, 128C)	Abundance Ratio: (F1, 129N) / (F1, 128C)	Abundance Ratio: (F1, 129C) / (F1, 128C)	Abundance Ratio: (F1, 130N) / (F1, 128C)	Abundance Ratio: (F1, 130C) / (F1, 128C)	Abundance Ratio: (F1, 131) / (F1, 128C)	Abundance: F1: 126, Sample	Abundance: F1: 127N, Sample	Abundance: F1: 127C, Sample	Abundance: F1: 128N, Sample	Abundance: F1: 128C, Control	Abundance: F1: 129N, Sample	Abundance: F1: 129C, Sample	Abundance: F1: 130N, Sample	Abundance: F1: 130C, Sample	Abundance: F1: 131, Sample	Abundances Count: F1: 126, Sample	Abundances Count: F1: 127N, Sample	Abundances Count: F1: 127C, Sample	Abundances Count: F1: 128N, Sample	Abundances Count: F1: 128C, Control	Abundances Count: F1: 129N, Sample
FALSE	High	[K].GSLGGGFSSGGFSGGSFSR.[G]	1xTMT6plex [N-Term]		TRUE	0.00243703	0	1	5	2	119581085	119581085 [41-59]	0	1936.94	High	High	High	High	High	High	High	High	High	High
FALSE	High	[K].SKELTTEIDNNIEQISSYK.[S]	3xTMT6plex [N-Term; K2; K19]; 1xDeamidated [N/Q]		TRUE	0.00149844	0	2	7	5	119581085; 88042	119581085 [344-362]; 88042 [215-233]	1	2900.57	High	High	High	High	High	High	High	High	High	High	1.284	0.356	2.156	1.412	1.018	0.604	1.148	1.073	1.353	53320	14770	89500	58620	41510	42240	25080	47680	44540	56180	1	1	1	1	1	1
FALSE	High	[K].SKELTTEIDNNIEQISSYK.[S]	3xTMT6plex [N-Term; K2; K19]		TRUE	0.00213794	0	2	7	1	119581085; 88042	119581085 [344-362]; 88042 [215-233]	1	2899.59	High	High	High	High	High	High	High	High	High	High	1.385	0.742	2.486	1.74	1.571	0.858	1.4	1.183	1.436	47370	25370	85020	59520	34200	53750	29360	47880	40460	49130	1	1	1	1	1	1
FALSE	High	[R].KDAEAWFNEK.[S]	3xTMT6plex [N-Term; K1; K10]		TRUE	0.0013904	0	1	7	3	119581085	119581085 [334-343]	1	1925.07	High	High	High	High	High	High	High	High	High	High	0.352	0.48	0.701	0.367	1.274	0.319	0.507	0.642	0.497	357800	488600	713700	373000	1018000	1297000	324800	515600	653800	505700	2	2	2	2	2	2
FALSE	High	[R].ALEESNYELEGK.[I]	2xTMT6plex [N-Term; K12]		TRUE	8.52451e-05	0	3	10	13	119581085; 88042; P02535	119581085 [166-177]; 88042 [37-48]; P02535 [164-175]	0	1839.97	High	High	High	High	High	High	High	High	High	High	0.351	0.141	0.608	0.481	0.678	0.66	0.496	1.107	0.417	2134000	858200	3696000	2922000	6081000	4122000	4015000	3017000	6729000	2534000	7	7	7	7	7	7
FALSE	High	[K].ELTTEIDNNIEQISSYK.[S]	2xTMT6plex [N-Term; K17]; 1xDeamidated [Q/N]		TRUE	6.88673e-05	0	2	7	6	119581085; 88042	119581085 [346-362]; 88042 [217-233]	0	2456.28	High	High	High	High	High	High	High	High	High	High	1.848	0.208	5.936	1.487	0.546	0.693	0.365	0.629	0.714	58630	6586	188300	47180	31730	17330	21980	11580	19970	22650	1	1	1	1	1	1
FALSE	High	[K].ELTTEIDNNIEQISSYK.[S]	2xTMT6plex [N-Term; K17]		TRUE	5.44357e-06	0	2	7	6	119581085; 88042	119581085 [346-362]; 88042 [217-233]	0	2455.3	High	High	High	High	High	High	High	High	High	High	1.449	0.446	4.489	1.219	0.612	0.646	0.531	0.732	0.686	291800	89850	904300	245500	201400	123300	130200	106900	147400	138300	4	4	4	4	4	4
FALSE	High	[R].AETECQNTEYQQLLDIK.[I]	2xTMT6plex [N-Term; K17]; 1xDeamidated [Q]; 1xCarbamidomethyl [C5]		TRUE	0.000716984	0	2	6	3	119581085; 88042	119581085 [423-439]; 88042 [294-310]	0	2542.27	High	High	High	High	High	High	High	High	High	High	0.514	0.501	1.431	0.648	0.672	0.763	0.409	1.011	0.496	76600	74670	213100	96500	149000	100100	113700	60900	150700	73870	1	1	1	1	1	1
FALSE	High	[R].AETECQNTEYQQLLDIK.[I]	2xTMT6plex [N-Term; K17]; 1xCarbamidomethyl [C5]		TRUE	5.82296e-06	0	2	6	12	119581085; 88042	119581085 [423-439]; 88042 [294-310]	0	2541.29	High	High	High	High	High	High	High	High	High	High	0.46	0.315	1.564	0.808	0.561	0.843	0.289	1.241	0.426	658900	450600	2241000	1158000	1433000	804000	1207000	413700	1778000	610000	8	8	8	8	8	8
FALSE	High	[R].NVSTGDVNVEMNAAPGVDLTQLLNNMR.[SN]	1xTMT6plex [N-Term]; 1xDeamidated [N12]; 2xOxidation [M11; M26]		TRUE	0.000195672	0	1	6	1	119581085	119581085 [296-322]	0	3134.53	High	High	High	High	High	High	High	High	High	High	0.565	1.027	1.243	1.115	1.5	0.844	1.228	1.772	1.784	7998	14530	17580	15780	14150	21220	11940	17370	25080	25250	1	1	1	1	1	1
FALSE	High	[R].GSSGGGCFGGSSGGYGGLGGFGGGSFR.[G]	1xTMT6plex [N-Term]; 1xCarbamidomethyl [C7]		TRUE	1.20973e-07	0	1	3	2	119581085	119581085 [60-86]	0	2572.15	High	High	High	High	High	High	High	High	High	High	0.73	1.259	0.784	0.543	1.245	0.647	1.044	1.099	1.066	76300	131600	81970	56770	104500	130100	67590	109100	114900	111500	2	2	2	2	2	2
FALSE	High	[R].NVSTGDVNVEMNAAPGVDLTQLLNNMR.[SN]	1xTMT6plex [N-Term]; 2xOxidation [M11; M26]		TRUE	0.000165962	0	1	6	1	119581085	119581085 [296-322]	0	3133.55	High	High	High	High	High	High	High	High	High	High
FALSE	High	[R].NVSTGDVNVEMNAAPGVDLTQLLNNMR.[SN]	1xTMT6plex [N-Term]		TRUE	9.36068e-05	0	1	6	2	119581085	119581085 [296-322]	0	3101.56	High	High	High	High	High	High	High	High	High	High	0.88	1.375	1.137	0.786	1.471	0.989	1.129	1.204	1.086	19830	30990	25620	17720	22540	33150	22300	25450	27140	24480	2	2	2	2	2	2
FALSE	High	[R].NVSTGDVNVEMNAAPGVDLTQLLNNMR.[SN]	1xTMT6plex [N-Term]; 1xOxidation [M11]		TRUE	1.20366e-05	0	1	6	1	119581085	119581085 [296-322]	0	3117.55	High	High	High	High	High	High	High	High	High	High	2.506	1.395	3.669	2.336	0.678	1.142	0.416	0.677	0.571	120400	67030	176300	112200	48040	32580	54840	20000	32520	27430	1	1	1	1	1	1
FALSE	High	[R].SQYEQLAEQNR.[K]	1xTMT6plex [N-Term]		TRUE	0.00101922	0	2	6	13	119581085; 88042	119581085 [323-333]; 88042 [194-204]	0	1594.8	High	High	High	High	High	High	High	High	High	High	0.515	0.595	0.642	0.511	0.999	0.958	0.575	1.537	0.739	2091000	2413000	2605000	2072000	4058000	4056000	3889000	2335000	6236000	2998000	8	8	8	8	8	8
FALSE	High	[R].SLLEGEGSSGGGGR.[G]	1xTMT6plex [N-Term]		TRUE	4.3458e-05	0	1	5	5	119581085	119581085 [451-464]	0	1491.76	High	High	High	High	High	High	High	High	High	High	0.429	0.341	0.492	0.34	0.638	0.553	0.748	0.934	0.631	294900	234100	338400	233600	687300	438600	380100	514300	641700	433500	3	3	3	3	3	3
FALSE	High	[R].QSVEADINGLR.[R]	1xTMT6plex [N-Term]		TRUE	0.00202127	0	3	16	6	119581085; 88042; P02535	119581085 [246-256]; 88042 [117-127]; P02535 [244-254]	0	1430.78	High	High	High	High	High	High	High	High	High	High	0.452	0.317	0.672	0.624	0.743	0.442	0.533	0.851	0.432	2933000	2057000	4362000	4056000	6495000	4826000	2869000	3461000	5528000	2809000	6	6	6	6	6	6
FALSE	High	[R].QSVEADINGLR.[R]	1xTMT6plex [N-Term]; 1xDeamidated [N8]		TRUE	0.000935172	0	3	16	6	119581085; 88042; P02535	119581085 [246-256]; 88042 [117-127]; P02535 [244-254]	0	1431.76	High	High	High	High	High	High	High	High	High	High	0.731	0.457	0.991	0.604	0.956	0.785	1.277	1.278	0.968	1880000	1176000	2549000	1554000	2573000	2460000	2020000	3285000	3288000	2491000	5	5	5	5	5	5
FALSE	High	[R].YCVQLSQIQAQISALEEQLQQIR.[A]	1xTMT6plex [N-Term]; 1xCarbamidomethyl [C2]		TRUE	1.61883e-06	0	2	5	1	119581085; 88042	119581085 [400-422]; 88042 [271-293]	0	2975.58	High	High	High	High	High	High	High	High	High	High
FALSE	High	[K].ADLEMQIESLTEELAYLK.[K]	2xTMT6plex [N-Term; K18]; 1xOxidation [M5]		TRUE	1.79099e-06	0	1	5	21	119581085	119581085 [267-284]	0	2570.37	High	High	High	High	High	High	High	High	High	High	3.026	0.563	9.078	2.361	0.557	0.428	0.169	0.329	0.173	988400	184000	2966000	771200	326700	182100	139800	55280	107600	56490	11	11	11	11	11	11
FALSE	High	[K].ADLEMQIESLTEELAYLK.[K]	2xTMT6plex [N-Term; K18]		TRUE	5.14304e-05	0	1	5	5	119581085	119581085 [267-284]	0	2554.37	High	High	High	High	High	High	High	High	High	High	2.445	1.256	3.833	1.651	0.971	1.269	0.379	0.918	1.141	236200	121300	370200	159500	96600	93790	122600	36610	88640	110200	4	4	4	4	4	4
FALSE	High	[K].ADLEMQIESLTEELAYLKK.[N]	3xTMT6plex [N-Term; K18; K19]; 1xDeamidated [Q6]; 1xOxidation [M5]		TRUE	0.00262636	0	1	5	1	119581085	119581085 [267-285]	1	2928.61	High	High	High	High	High	High	High	High	High	High	2.249	0.76	3.45	2.227	0.773	0.278	0.251	1.166	0.577	35930	12140	55100	35570	15970	12350	4442	4005	18630	9220	1	1	1	1	1	1
FALSE	High	[K].ADLEMQIESLTEELAYLKK.[N]	3xTMT6plex [N-Term; K18; K19]; 1xOxidation [M5]		TRUE	2.82573e-05	0	1	5	7	119581085	119581085 [267-285]	1	2927.63	High	High	High	High	High	High	High	High	High	High	2.337	0.621	4.46	2.639	0.663	0.654	0.328	0.571	0.396	426900	113400	814600	481900	182600	121000	119300	59980	104200	72230	7	7	7	7	7	7
FALSE	High	[K].ADLEMQIESLTEELAYLK.[K]	2xTMT6plex [N-Term; K18]; 1xDeamidated [Q6]; 1xOxidation [M5]		TRUE	0.00230404	0	1	5	2	119581085	119581085 [267-284]	0	2571.35	High	High	High	High	High	High	High	High	High	High	1.231	0.662	4.426	1.16	1.06	0.211	0.165	0.244	0.267	14430	7759	51880	13590	11720	12420	2470	1935	2861	3133	1	1	1	1	1	1
FALSE	High	[K].TIDDLKNQILNLTTDNANILLQIDNAR.[L]	2xTMT6plex [N-Term; K6]		TRUE	0.000462766	0	2	7	1	119581085; 88042	119581085 [202-228]; 88042 [73-99]	1	3510.95	High	High	High	High	High	High	High	High	High	High
FALSE	High	[K].ADLEMQIESLTEELAYLKK.[N]	3xTMT6plex [N-Term; K18; K19]; 1xDeamidated [Q6]		TRUE	0.00131945	0	1	5	2	119581085	119581085 [267-285]	1	2912.61	High	High	High	High	High	High	High	High	High	High	2.326	1.07	2.957	1.669	0.617	2.525	0.883	1.136	0.3	17560	8079	22310	12590	7548	4654	19060	6664	8571	2264	1	1	1	1	1	1
FALSE	High	[K].ADLEMQIESLTEELAYLKK.[N]	3xTMT6plex [N-Term; K18; K19]		TRUE	5.5672e-06	0	1	5	10	119581085	119581085 [267-285]	1	2911.63	High	High	High	High	High	High	High	High	High	High	1.711	0.702	2.213	1.656	0.724	1.89	0.381	0.808	0.525	156700	64340	202700	151700	91600	66280	173200	34880	74030	48070	5	5	5	5	5	5
FALSE	High	[R].NVQALEIELQSQLALK.[Q]	2xTMT6plex [N-Term; K16]		TRUE	3.28211e-05	0	1	6	8	119581085	119581085 [371-386]	0	2255.34	High	High	High	High	High	High	High	High	High	High	1.164	0.68	3.024	1.012	0.656	1.503	0.898	1.956	0.639	363600	212500	945000	316200	312500	205100	469600	280500	611200	199800	5	5	5	5	5	5
FALSE	High	[K].NQILNLTTDNANILLQIDNAR.[L]	1xTMT6plex [N-Term]		TRUE	5.91461e-07	0	2	7	3	119581085; 88042	119581085 [208-228]; 88042 [79-99]	0	2596.43	High	High	High	High	High	High	High	High	High	High	1.33	1.267	2.72	1.064	1.267	1.29	0.969	1.748	1.238	95690	91170	195700	76560	71950	91130	92810	69700	125800	89090	2	2	2	2	2	2
FALSE	High	[K].NQILNLTTDNANILLQIDNAR.[L]	1xTMT6plex [N-Term]; 1xDeamidated [N10]		TRUE	0.00018156	0	2	7	1	119581085; 88042	119581085 [208-228]; 88042 [79-99]	0	2597.41	High	High	High	High	High	High	High	High	High	High
FALSE	High	[R].VLDELTLTK.[A]	2xTMT6plex [N-Term; K9]		TRUE	0.0102652	0.00117917	2	6	10	119581085; 88042	119581085 [258-266]; 88042 [129-137]	0	1489.92	High	High	High	High	High	High	High	High	High	High	0.47	0.174	1.104	0.491	0.452	0.784	0.347	1.437	0.352	2565000	948300	6028000	2680000	5458000	2468000	4281000	1893000	7842000	1924000	9	9	9	9	9	9
FALSE	High	[K].YENEVALR.[Q]	1xTMT6plex [N-Term]		TRUE	0.0503346	0.00171593	2	7	4	119581085; 88042	119581085 [238-245]; 88042 [109-116]	0	1222.66	High	High	High	High	High	High	High	High	High	High	1.327	0.825	2.449	1.316	1.092	1.151	1.021	1.032	0.94	1120000	696500	2067000	1111000	844200	921800	972000	862300	871400	793900	1	1	1	1	1	1
FALSE	High	[R].LKYENEVALR.[Q]	2xTMT6plex [N-Term; K2]		TRUE	0.0651222	0.00171593	2	7	1	119581085; 88042	119581085 [236-245]; 88042 [107-116]	1	1693	High	High	High	High	High	High	High	High	High	High	1.529	0.879	3.326	1.375	1.221	1.349	0.734	1.87	0.738	710800	408700	1546000	639200	464900	567800	627300	341400	869600	343100	1	1	1	1	1	1
FALSE	High	[K-R].VTMQNLNDR.[L]	1xTMT6plex [N-Term]; 1xDeamidated [N7]		TRUE	0.0476543	0.00171593	4	25	1	119581085; 88042; 125080; P02535	119581085 [148-156]; 88042 [19-27]; 125080 [117-125]; P02535 [146-154]	0	1320.68	High	High	High	High	High	High	High	High	High	High	0.617	0.674	0.666	0.583	0.878	0.601	0.689	0.991	0.75	223100	243800	240900	210800	361800	317800	217500	249300	358400	271200	1	1	1	1	1	1
FALSE	High	[K-R].VTMQNLNDR.[L]	1xTMT6plex [N-Term]		TRUE	0.0180635	0.00171593	4	25	5	119581085; 88042; 125080; P02535	119581085 [148-156]; 88042 [19-27]; 125080 [117-125]; P02535 [146-154]	0	1319.69	High	High	High	High	High	High	High	High	High	High	0.368	0.174	0.556	0.397	0.6	0.683	0.553	1.218	0.491	1401000	663700	2115000	1509000	3804000	2281000	2599000	2106000	4634000	1867000	2	2	2	2	2	2
FALSE	High	[K].NHEEEMK.[DEACV]	2xTMT6plex [N-Term; K7]		TRUE	0.0892638	0.00171593	2	18	1	119581085; 88042	119581085 [286-292]; 88042 [157-163]	0	1374.71	High	High	High	High	High	High	High	High	High	High
FALSE	High	[R].LASYLDKVR.[A]	2xTMT6plex [N-Term; K7]		TRUE	0.0746653	0.00171593	3	26	2	119581085; 88042; 125080	119581085 [157-165]; 88042 [28-36]; 125080 [126-134]	1	1522.94	High	High	High	High	High	High	High	High	High	High	0.488	0.848	0.569	0.769	1.484	0.616	1.021	0.689	0.759	187200	325500	218300	295300	383800	569700	236600	391900	264500	291400	1	1	1	1	1	1
FALSE	High	[R].LENEIQTYR.[SG]	1xTMT6plex [N-Term]		TRUE	0.0368722	0.00171593	3	11	2	119581085; 88042; P02535	119581085 [442-450]; 88042 [313-321]; P02535 [440-448]	0	1394.75	High	High	High	High	High	High	High	High	High	High	0.165	0.129	0.562	0.369	0.572	0.622	0.446	1.552	0.857	356600	279600	1216000	798100	2163000	1237000	1345000	965300	3357000	1854000	1	1	1	1	1	1
FALSE	High	[K].DAEAWFNEK.[S]	2xTMT6plex [N-Term; K9]		TRUE	0.145245	0.00250807	1	7	3	119581085	119581085 [335-343]	0	1567.82	High	High	High	High	High	High	High	High	High	High	0.373	0.342	0.604	0.484	0.651	0.806	0.65	1.067	0.558	71080	65050	115000	92120	190400	124000	153400	123700	203200	106200	1	1	1	1	1	1
FALSE	High	[R].LASYLDK.[V]	2xTMT6plex [N-Term; K7]		TRUE	0.165448	0.00332358	4	30	7	119581085; 88042; 125080; 1082558	119581085 [157-163]; 88042 [28-34]; 125080 [126-132]; 1082558 [164-170]	0	1267.77	High	High	High	High	High	High	High	High	High	High	0.895	0.046	0.582	0.374	0.577	0.524	0.467	0.901	0.292	46260000	2385000	30060000	19330000	51690000	29840000	27090000	24130000	46570000	15090000	3	3	3	3	3	3
FALSE	High	[K-R].VTMQNLNDR.[L]	1xTMT6plex [N-Term]; 1xOxidation [M3]		TRUE	0.18195	0.00651022	4	25	1	119581085; 88042; 125080; P02535	119581085 [148-156]; 88042 [19-27]; 125080 [117-125]; P02535 [146-154]	0	1335.69	High	High	High	High	High	High	High	High	High	High	0.43	0.375	0.618	0.541	0.827	0.652	0.669	1.147	0.666	37120	32410	53370	46760	86370	71460	56320	57810	99080	57510	1	1	1	1	1	1
FALSE	High	[K].KNHEEEMKDLR.[N]	3xTMT6plex [N-Term; K1; K8]; 1xOxidation [M7]		TRUE	0.190111	0.00804114	2	6	2	119581085; 88042	119581085 [285-295]; 88042 [156-166]	2	2132.17	High	High	High	High	High	High	High	High	High	High	0.712	0.746	0.582	0.529	0.794	0.596	0.647	0.731	0.583	168100	176100	137300	124800	235900	187400	140700	152600	172400	137500	1	1	1	1	1	1
High	Master Protein	254622	112352 *CON* keratin 2, CK 2 [human, epidermis, Peptide, 645 aa] [Homo sapiens]	TRUE	0	207.718	41.8605	30	167	22	1	645	65.871	7.96	High	High	High	High	High	High	High	High	High	High										0.438	0.329	0.771	0.499	0.596	0.506	0.514	1.011	0.566	17880000	13440000	31500000	20390000	40850000	24340000	20690000
Checked	Confidence	Annotated Sequence	Modifications	Modifications in Master Proteins	Contaminant	Qvality PEP	Qvality q-value	# Protein Groups	# Proteins	# PSMs	Master Protein Accessions	Positions in Master Proteins	# Missed Cleavages	Theo. MH+ [Da]	Found in Sample: [S1] F1: 126, Sample	Found in Sample: [S2] F1: 127N, Sample	Found in Sample: [S3] F1: 127C, Sample	Found in Sample: [S4] F1: 128N, Sample	Found in Sample: [S5] F1: 128C, Control	Found in Sample: [S6] F1: 129N, Sample	Found in Sample: [S7] F1: 129C, Sample	Found in Sample: [S8] F1: 130N, Sample	Found in Sample: [S9] F1: 130C, Sample	Found in Sample: [S10] F1: 131, Sample	Abundance Ratio: (F1, 126) / (F1, 128C)	Abundance Ratio: (F1, 127N) / (F1, 128C)	Abundance Ratio: (F1, 127C) / (F1, 128C)	Abundance Ratio: (F1, 128N) / (F1, 128C)	Abundance Ratio: (F1, 129N) / (F1, 128C)	Abundance Ratio: (F1, 129C) / (F1, 128C)	Abundance Ratio: (F1, 130N) / (F1, 128C)	Abundance Ratio: (F1, 130C) / (F1, 128C)	Abundance Ratio: (F1, 131) / (F1, 128C)	Abundance: F1: 126, Sample	Abundance: F1: 127N, Sample	Abundance: F1: 127C, Sample	Abundance: F1: 128N, Sample	Abundance: F1: 128C, Control	Abundance: F1: 129N, Sample	Abundance: F1: 129C, Sample	Abundance: F1: 130N, Sample	Abundance: F1: 130C, Sample	Abundance: F1: 131, Sample	Abundances Count: F1: 126, Sample	Abundances Count: F1: 127N, Sample	Abundances Count: F1: 127C, Sample	Abundances Count: F1: 128N, Sample	Abundances Count: F1: 128C, Control	Abundances Count: F1: 129N, Sample
FALSE	High	[R].FLEQQNQVLQTK.[W]	2xTMT6plex [N-Term; K12]		TRUE	0.000107914	0	2	11	12	254622; P04264	254622 [204-215]; P04264 [200-211]	0	1934.11	High	High	High	High	High	High	High	High	High	High	1.224	0.204	0.84	0.468	0.512	0.656	0.413	1.214	0.323	9930000	1657000	6815000	3796000	8114000	4151000	5321000	3355000	9852000	2622000	8	8	8	8	8	8
FALSE	High	[R].TAAENDFVTLK.[K]	2xTMT6plex [N-Term; K11]		TRUE	0.000761223	0	1	3	2	254622	254622 [282-292]	0	1666.94	High	High	High	High	High	High	High	High	High	High	0.423	0.132	0.719	0.362	0.412	0.343	0.366	1.134	0.394	1771000	550000	3005000	1515000	4182000	1722000	1436000	1532000	4742000	1649000	2	2	2	2	2	2
FALSE	High	[R].TSQNSELNNMQDLVEDYKK.[K]	3xTMT6plex [N-Term; K18; K19]		TRUE	3.51766e-08	0	1	3	4	254622	254622 [254-272]	1	2943.53	High	High	High	High	High	High	High	High	High	High	0.564	0.29	1.11	0.491	0.503	0.615	0.344	1.362	0.563	106200	54680	209000	92450	188300	94780	115700	64740	256400	106000	1	1	1	1	1	1
FALSE	High	[R].TSQNSELNNMQDLVEDYKK.[K]	3xTMT6plex [N-Term; K18; K19]; 1xDeamidated [Q11]		TRUE	7.99899e-05	0	1	3	1	254622	254622 [254-272]	1	2944.52	High	High	High	High	High	High	High	High	High	High	0.542	0.356	1.023	0.47	0.671	0.606	0.454	1.728	0.813	55280	36340	104300	47910	101900	68420	61790	46280	176200	82910	1	1	1	1	1	1
FALSE	High	[R].TSQNSELNNMQDLVEDYKK.[K]	3xTMT6plex [N-Term; K18; K19]; 1xOxidation [M10]		TRUE	0.000193487	0	1	3	2	254622	254622 [254-272]	1	2959.53	High	High	High	High	High	High	High	High	High	High	0.989	0.535	1.257	0.49	0.746	0.596	0.484	1.3	0.542	74980	40530	95310	37120	75800	56580	45180	36660	98570	41070	1	1	1	1	1	1
FALSE	High	[R].TAAENDFVTLKK.[D]	3xTMT6plex [N-Term; K11; K12]		TRUE	0.00061731	0	1	3	2	254622	254622 [282-293]	1	2024.2	High	High	High	High	High	High	High	High	High	High	0.51	0.305	1.022	0.661	0.701	0.361	0.505	0.654	0.374	599800	359200	1201000	777100	1176000	824300	424500	593300	769400	439800	2	2	2	2	2	2
FALSE	High	[R].NKLNDLEEALQQAK.[E]	3xTMT6plex [N-Term; K2; K14]		TRUE	6.70864e-05	0	1	3	3	254622	254622 [446-459]	1	2301.34	High	High	High	High	High	High	High	High	High	High	0.967	0.359	2.042	1.555	0.717	0.664	0.493	0.735	0.717	245400	91150	518600	394800	253900	182100	168700	125300	186500	182000	1	1	1	1	1	1
FALSE	High	[K].LNDLEEALQQAK.[E]	2xTMT6plex [N-Term; K12]		TRUE	0.000162277	0	1	3	7	254622	254622 [448-459]	0	1830.04	High	High	High	High	High	High	High	High	High	High	0.373	0.21	0.909	0.611	0.675	0.661	0.36	1.246	0.419	814300	459200	1985000	1335000	2183000	1473000	1443000	785700	2720000	915600	4	4	4	4	4	4
FALSE	High	[R].TSQNSELNNMQDLVEDYKK.[K]	3xTMT6plex [N-Term; K18; K19]; 1xDeamidated [N/Q]; 1xOxidation [M10]		TRUE	0.000163496	0	1	3	5	254622	254622 [254-272]	1	2960.51	High	High	High	High	High	High	High	High	High	High	0.812	0.538	1.247	0.595	0.669	0.514	0.501	1.296	0.564	179900	119300	276200	131700	221500	148300	113800	111100	287000	124900	2	2	2	2	2	2
FALSE	High	[R].GFSSGSAVVSGGSR.[R]	1xTMT6plex [N-Term]		TRUE	6.17835e-05	0	1	4	7	254622	254622 [21-34]	0	1483.77	High	High	High	High	High	High	High	High	High	High	0.858	0.786	0.528	0.505	1.25	0.662	0.623	0.999	0.581	985500	902800	606400	580100	1149000	1436000	760700	715700	1147000	667100	6	6	6	6	6	6
FALSE	High	[K].VDLLNQEIEFLK.[V]	2xTMT6plex [N-Term; K12]		TRUE	0.000103561	0	1	3	16	254622	254622 [309-320]	0	1919.13	High	High	High	High	High	High	High	High	High	High	0.323	0.108	0.669	0.37	0.327	0.372	0.191	1.015	0.207	755700	251500	1565000	865600	2339000	763800	869200	447800	2373000	484200	7	7	7	7	7	7
FALSE	High	[R].LQGEIAHVK.[K]	2xTMT6plex [N-Term; K9]		TRUE	0.00704423	0	1	3	5	254622	254622 [412-420]	0	1452.89	High	High	High	High	High	High	High	High	High	High	0.654	0.35	1.692	0.956	0.908	0.892	0.903	1.409	0.764	2339000	1252000	6047000	3416000	3575000	3245000	3187000	3228000	5037000	2730000	5	5	5	5	5	5
FALSE	High	[R].HGGGGGGFGGGGFGSR.[S]	1xTMT6plex [N-Term]		TRUE	0.000104731	0	1	3	4	254622	254622 [46-61]	0	1549.75	High	High	High	High	High	High	High	High	High	High	0.368	0.441	0.434	0.336	0.688	0.372	0.851	0.663	1.289	678000	813000	799800	619800	1842000	1266000	685200	1567000	1222000	2374000	3	3	3	3	3	3
FALSE	High	[R].NLDLDSIIAEVKAQYEEIAQR.[S]	2xTMT6plex [N-Term; K12]		TRUE	1.93744e-06	0	2	13	7	254622; 1346344	254622 [348-368]; 1346344 [327-347]	1	2876.58	High	High	High	High	High	High	High	High	High	High	0.127	0.478	0.129	0.192	2.422	0.16	0.257	0.152	0.205	27810	104600	28310	41980	218800	529900	34910	56110	33280	44850	3	3	3	3	3	3
FALSE	High	[R].NLDLDSIIAEVKAQYEEIAQR.[S]	2xTMT6plex [N-Term; K12]; 2xDeamidated [Q14; Q20]		TRUE	0.00259705	0	2	13	1	254622; 1346344	254622 [348-368]; 1346344 [327-347]	1	2878.54	High	High	High	High	High	High	High	High	High	High
FALSE	High	[R].NLDLDSIIAEVKAQYEEIAQR.[S]	2xTMT6plex [N-Term; K12]; 1xDeamidated [Q14]		TRUE	4.15761e-06	0	2	13	5	254622; 1346344	254622 [348-368]; 1346344 [327-347]	1	2877.56	High	High	High	High	High	High	High	High	High	High	0.053	0.505	0.1	0.163	2.731	0.206	0.284	0.185	0.142	5769	54750	10840	17710	108500	296300	22330	30820	20020	15440	2	2	2	2	2	2
FALSE	High	[K].GGSISGGGYGSGGGK.[H]	2xTMT6plex [N-Term; K15]		TRUE	7.2348e-06	0	1	3	4	254622	254622 [587-601]	0	1655.88	High	High	High	High	High	High	High	High	High	High	0.62	1.623	0.507	0.594	1.13	0.654	0.763	0.56	0.73	519700	1361000	424900	498400	838600	947500	548700	639800	469600	611700	3	3	3	3	3	3
FALSE	High	[K].NVQDAIADAEQR.[G]	1xTMT6plex [N-Term]		TRUE	0.000323096	0	1	3	2	254622	254622 [425-436]	0	1558.8	High	High	High	High	High	High	High	High	High	High	0.365	0.206	0.818	0.377	0.713	0.463	0.757	0.979	0.552	287000	161700	643400	296500	786600	560600	364200	595200	770200	434300	1	1	1	1	1	1
FALSE	High	[K].LALDVEIATYR.[K]	1xTMT6plex [N-Term]		TRUE	0.0022529	0	4	29	3	125105; 254622; 1346344; 88052	125105 [461-471]; 254622 [477-487]; 1346344 [456-466]; 88052 [460-470]	0	1492.86	High	High	High	High	High	High	High	High	High	High	0.932	0.701	3.658	2.091	0.878	1.68	0.664	2.009	0.816	557100	418800	2187000	1250000	597700	524600	1004000	396900	1201000	488000	2	2	2	2	2	2
FALSE	High	[K].KDVDNAYMIK.[V]	3xTMT6plex [N-Term; K1; K10]		TRUE	0.00102304	0	1	3	3	254622	254622 [293-302]	1	1884.09	High	High	High	High	High	High	High	High	High	High	0.317	0.275	0.647	0.38	0.537	0.685	0.576	1.166	0.5	644800	559500	1316000	771900	2033000	1091000	1393000	1171000	2371000	1016000	3	3	3	3	3	3
FALSE	High	[R].NLDLDSIIAEVK.[A]	2xTMT6plex [N-Term; K12]		TRUE	0.000122559	0	4	19	10	125105; 254622; 1346344; 88052	125105 [332-343]; 254622 [348-359]; 1346344 [327-338]; 88052 [331-342]	0	1788.05	High	High	High	High	High	High	High	High	High	High	1.42	0.564	1.75	1.314	0.448	1.109	0.291	1.649	0.364	1886000	748600	2324000	1745000	1328000	595100	1472000	386500	2189000	483700	7	7	7	7	7	7
FALSE	High	[R].DYQELMNVK.[L]	2xTMT6plex [N-Term; K9]		TRUE	0.0124575	0.00117917	1	7	3	254622	254622 [468-476]	0	1597.87	High	High	High	High	High	High	High	High	High	High	0.72	0.431	1.243	0.624	0.583	0.702	0.608	1.43	3.005	610000	365400	1053000	528300	847100	493700	594900	515200	1212000	2546000	3	3	3	3	3	3
FALSE	High	[KR].AQYEEIAQR.[S]	1xTMT6plex [N-Term]		TRUE	0.0129778	0.00117917	2	15	4	254622; 1346344	254622 [360-368]; 1346344 [339-347]	0	1336.71	High	High	High	High	High	High	High	High	High	High	1.05	0.675	1.368	1.071	0.888	0.876	1.553	1.166	1.054	792100	509600	1033000	808200	754700	669800	661400	1172000	879700	795800	3	3	3	3	3	3
FALSE	High	[K].VDPEIQNVK.[SA]	2xTMT6plex [N-Term; K9]		TRUE	0.0106547	0.00117917	1	4	8	254622	254622 [173-181]	0	1499.88	High	High	High	High	High	High	High	High	High	High	0.271	0.169	0.279	0.218	0.371	0.329	0.33	0.639	0.332	1434000	893400	1475000	1155000	5292000	1961000	1743000	1744000	3381000	1757000	5	5	5	5	5	5
FALSE	High	[R].SKEEAEALYHSK.[Y]	3xTMT6plex [N-Term; K2; K12]		TRUE	0.0095994	0.00117917	1	3	5	254622	254622 [369-380]	1	2079.17	High	High	High	High	High	High	High	High	High	High	0.419	0.486	1.365	2.086	0.845	0.799	0.889	1.23	0.868	369100	428300	1203000	1839000	881500	745200	704000	783800	1084000	765100	2	2	2	2	2	2
FALSE	High	[KR-].YEDEINK.[R]	2xTMT6plex [N-Term; K7]		TRUE	0.112298	0.00171593	4	40	4	125105; 254622; P04264; 1346344	125105 [258-264]; 254622 [274-280]; P04264 [270-276]; 1346344 [253-259]	0	1368.74	High	High	High	High	High	High	High	High	High	High	1.444	0.29	1.128	0.499	0.647	0.596	0.618	1.063	0.411	2672000	536200	2087000	923000	1851000	1197000	1103000	1143000	1967000	760700	1	1	1	1	1	1
FALSE	High	[R].STSSFSCLSR.[H]	1xTMT6plex [N-Term]; 1xCarbamidomethyl [C7]		TRUE	0.0335074	0.00171593	1	3	2	254622	254622 [36-45]	0	1360.67	High	High	High	High	High	High	High	High	High	High	0.22	0.836	0.283	0.461	0.745	0.588	0.682	1.096	0.812	97620	371300	125700	204600	444200	330800	261400	302900	486700	360800	1	1	1	1	1	1
FALSE	High	[K].KYEDEINK.[R]	3xTMT6plex [N-Term; K1; K8]		TRUE	0.0286976	0.00171593	1	7	5	254622	254622 [273-280]	1	1726	High	High	High	High	High	High	High	High	High	High	0.475	0.235	1.071	0.416	0.572	0.604	0.516	1.75	0.537	1143000	564500	2574000	999500	2404000	1375000	1452000	1241000	4206000	1291000	2	2	2	2	2	2
FALSE	High	[K].DVDNAYMIK.[V]	2xTMT6plex [N-Term; K9]; 1xOxidation [M7]		TRUE	0.09448	0.00171593	1	3	4	254622	254622 [294-302]	0	1542.82	High	High	High	High	High	High	High	High	High	High	0.277	0.361	0.673	0.513	0.656	0.311	0.561	0.954	0.484	489600	638200	1189000	906900	1767000	1158000	549000	990600	1686000	854400	3	3	3	3	3	3
FALSE	High	[K].DVDNAYMIK.[V]	2xTMT6plex [N-Term; K9]		TRUE	0.0191682	0.00171593	1	3	1	254622	254622 [294-302]	0	1526.83	High	High	High	High	High	High	High	High	High	High
FALSE	High	[K].KDVDNAYMIK.[V]	3xTMT6plex [N-Term; K1; K10]; 1xOxidation [M8]		TRUE	0.0215825	0.00171593	1	3	5	254622	254622 [293-302]	1	1900.08	High	High	High	High	High	High	High	High	High	High	0.3	0.178	1.138	0.458	0.431	0.345	0.321	0.956	0.28	336600	200300	1278000	514000	1123000	484100	387900	360500	1074000	314500	1	1	1	1	1	1
FALSE	High	[R].YGSGGGSK.[G]	2xTMT6plex [N-Term; K8]		TRUE	0.068741	0.00171593	1	3	1	254622	254622 [579-586]	0	1170.65	High	High	High	High	High	High	High	High	High	High	0.608	1.742	0.325	0.519	1.093	0.61	0.77	0.628	0.638	355000	1017000	189700	303100	584000	638500	356100	449900	366500	372500	1	1	1	1	1	1
FALSE	High	[R].KLLEGEECR.[LMI]	2xTMT6plex [N-Term; K1]; 1xCarbamidomethyl [C8]		TRUE	0.0880029	0.00171593	4	31	5	125105; 254622; 1346344; 88052	125105 [472-480]; 254622 [488-496]; 1346344 [467-475]; 88052 [471-479]	1	1591.89	High	High	High	High	High	High	High	High	High	High
FALSE	High	[R].YLDGLTAER.[T]	1xTMT6plex [N-Term]		TRUE	0.0215027	0.00171593	1	3	3	254622	254622 [245-253]	0	1266.69	High	High	High	High	High	High	High	High	High	High	0.504	0.333	0.739	0.372	0.597	0.439	0.481	0.859	0.421	1017000	672400	1490000	749800	2018000	1205000	885100	970300	1734000	848900	3	3	3	3	3	3
FALSE	High	[R].DYQELMNVK.[L]	2xTMT6plex [N-Term; K9]; 1xOxidation [M6]		TRUE	0.068741	0.00171593	1	7	2	254622	254622 [468-476]	0	1613.86	High	High	High	High	High	High	High	High	High	High	0.525	0.647	0.93	0.618	0.985	0.522	0.828	1.116	0.882	133800	164900	236800	157400	254700	250900	132900	211000	284200	224700	1	1	1	1	1	1
FALSE	High	[K].YEELQVTVGR.[H]	1xTMT6plex [N-Term]		TRUE	0.020952	0.00171593	1	3	4	254622	254622 [381-390]	0	1422.78	High	High	High	High	High	High	High	High	High	High	0.902	0.575	1.383	1.125	0.89	0.93	0.894	1.083	0.764	623800	397800	956200	777700	691400	615100	642800	618100	748700	527900	2	2	2	2	2	2
FALSE	High	[R].TAAENDFVTLKK.[D]	3xTMT6plex [N-Term; K11; K12]; 1xDeamidated [N5]		TRUE	0.140806	0.00171593	1	3	1	254622	254622 [282-293]	1	2025.18	High	High	High	High	High	High	High	High	High	High
FALSE	High	[R].SLVGLGGTK.[S]	2xTMT6plex [N-Term; K9]		TRUE	0.0194546	0.00171593	1	3	3	254622	254622 [62-70]	0	1289.82	High	High	High	High	High	High	High	High	High	High	0.337	0.199	0.259	0.242	0.333	0.379	0.314	0.666	0.386	1215000	717300	932400	872200	3604000	1199000	1365000	1133000	2401000	1393000	1	1	1	1	1	1
FALSE	High	[KR-].YEDEINKR.[TYA]	2xTMT6plex [N-Term; K7]		TRUE	0.187565	0.00804114	4	40	2	125105; 254622; P04264; 1346344	125105 [258-265]; 254622 [274-281]; P04264 [270-277]; 1346344 [253-260]	1	1524.84	High	High	High	High	High	High	High	High	High	High	2.588	1.691	0.972	0.648	1.196	0.791	0.83	1.437	0.666	1171000	764900	439900	293300	452400	541100	357800	375300	650100	301400	1	1	1	1	1	1
High	Master Protein	P04264	*CON* Keratin, type II cytoskeletal 1 OS=Homo sapiens GN=KRT1 PE=1 SV=6	TRUE	0	192.91	51.8634	36	247	31	1	644	65.999	8.12	High	High	High	High	High	High	High	High	High	High		3848	ENSG00000167768	KRT1	12	defense response;metabolic process;regulation of biological process;response to stimulus;transport	cytoskeleton;membrane;nucleus	catalytic activity;motor activity;protein binding;receptor activity;structural molecule activity;transporter activity	Pf00038, Pf01576, Pf05103, Pf05957, Pf12128, Pf13166, Pf13514	1.85	0.491	1.094	0.659	0.672	0.796	0.69	1.129	0.522	150400000	39940000	88970000	53610000	81310000	54670000	64700000
Checked	Confidence	Annotated Sequence	Modifications	Modifications in Master Proteins	Contaminant	Qvality PEP	Qvality q-value	# Protein Groups	# Proteins	# PSMs	Master Protein Accessions	Positions in Master Proteins	# Missed Cleavages	Theo. MH+ [Da]	Found in Sample: [S1] F1: 126, Sample	Found in Sample: [S2] F1: 127N, Sample	Found in Sample: [S3] F1: 127C, Sample	Found in Sample: [S4] F1: 128N, Sample	Found in Sample: [S5] F1: 128C, Control	Found in Sample: [S6] F1: 129N, Sample	Found in Sample: [S7] F1: 129C, Sample	Found in Sample: [S8] F1: 130N, Sample	Found in Sample: [S9] F1: 130C, Sample	Found in Sample: [S10] F1: 131, Sample	Abundance Ratio: (F1, 126) / (F1, 128C)	Abundance Ratio: (F1, 127N) / (F1, 128C)	Abundance Ratio: (F1, 127C) / (F1, 128C)	Abundance Ratio: (F1, 128N) / (F1, 128C)	Abundance Ratio: (F1, 129N) / (F1, 128C)	Abundance Ratio: (F1, 129C) / (F1, 128C)	Abundance Ratio: (F1, 130N) / (F1, 128C)	Abundance Ratio: (F1, 130C) / (F1, 128C)	Abundance Ratio: (F1, 131) / (F1, 128C)	Abundance: F1: 126, Sample	Abundance: F1: 127N, Sample	Abundance: F1: 127C, Sample	Abundance: F1: 128N, Sample	Abundance: F1: 128C, Control	Abundance: F1: 129N, Sample	Abundance: F1: 129C, Sample	Abundance: F1: 130N, Sample	Abundance: F1: 130C, Sample	Abundance: F1: 131, Sample	Abundances Count: F1: 126, Sample	Abundances Count: F1: 127N, Sample	Abundances Count: F1: 127C, Sample	Abundances Count: F1: 128N, Sample	Abundances Count: F1: 128C, Control	Abundances Count: F1: 129N, Sample
FALSE	High	[R].FLEQQNQVLQTK.[W]	2xTMT6plex [N-Term; K12]		TRUE	0.000107914	0	2	11	12	254622; P04264	254622 [204-215]; P04264 [200-211]	0	1934.11	High	High	High	High	High	High	High	High	High	High	1.224	0.204	0.84	0.468	0.512	0.656	0.413	1.214	0.323	9930000	1657000	6815000	3796000	8114000	4151000	5321000	3355000	9852000	2622000	8	8	8	8	8	8
FALSE	High	[K].NKLNDLEDALQQAK.[E]	3xTMT6plex [N-Term; K2; K14]		TRUE	1.31679e-05	0	1	3	4	P04264	P04264 [442-455]	1	2287.32	High	High	High	High	High	High	High	High	High	High	4.911	0.606	3.351	1.341	0.831	1.209	0.477	0.608	0.605	3220000	397400	2197000	879300	655600	544900	792600	313000	398900	396500	3	3	3	3	3	3
FALSE	High	[K].NKLNDLEDALQQAK.[E]	3xTMT6plex [N-Term; K2; K14]; 1xDeamidated [Q/N]		TRUE	8.94955e-05	0	1	3	3	P04264	P04264 [442-455]	1	2288.31	High	High	High	High	High	High	High	High	High	High	2.05	0.531	1.597	0.787	1.277	0.804	1.088	0.6	1.043	188700	48850	147000	72410	92020	117500	74020	100200	55180	95960	1	1	1	1	1	1
FALSE	High	[K].KQISNLQQSISDAEQR.[G]	2xTMT6plex [N-Term; K1]		TRUE	3.17338e-05	0	1	4	6	P04264	P04264 [417-432]	1	2303.27	High	High	High	High	High	High	High	High	High	High	2.69	0.784	3.099	0.912	0.714	0.974	0.664	1.434	0.807	2778000	809200	3200000	942300	1033000	736900	1006000	685900	1481000	833900	4	4	4	4	4	4
FALSE	High	[R].FSSCGGGGGSFGAGGGFGSR.[S]	1xTMT6plex [N-Term]; 1xCarbamidomethyl [C4]		TRUE	0.000223059	0	1	2	1	P04264	P04264 [46-65]	0	1994.9	High	High	High	High	High	High	High	High	High	High	1.191	1.269	0.387	0.567	0.941	0.494	0.823	1.157	0.828	145800	155300	47400	69390	122300	115100	60400	100600	141500	101200	1	1	1	1	1	1
FALSE	High	[R].TNAENEFVTIKK.[D]	3xTMT6plex [N-Term; K11; K12]		TRUE	0.000192765	0	1	5	5	P04264	P04264 [278-289]	1	2081.22	High	High	High	High	High	High	High	High	High	High	1.26	0.987	1.606	1.135	0.627	0.604	0.873	0.698	0.497	2763000	2165000	3523000	2490000	2194000	1374000	1326000	1916000	1531000	1091000	3	3	3	3	3	3
FALSE	High	[R].TNAENEFVTIK.[K]	2xTMT6plex [N-Term; K11]		TRUE	0.000566401	0	1	5	7	P04264	P04264 [278-288]	0	1723.96	High	High	High	High	High	High	High	High	High	High	1.626	0.302	1.475	0.583	0.554	0.774	0.585	1.387	0.43	5799000	1077000	5259000	2079000	3566000	1975000	2759000	2085000	4945000	1532000	5	5	5	5	5	5
FALSE	High	[K].QISNLQQSISDAEQR.[G]	1xTMT6plex [N-Term]		TRUE	7.51073e-06	0	1	4	12	P04264	P04264 [418-432]	0	1946.01	High	High	High	High	High	High	High	High	High	High	1.935	1.61	1.872	0.952	1.008	0.835	0.706	1.303	0.852	2848000	2370000	2756000	1402000	1472000	1484000	1229000	1039000	1918000	1254000	9	9	9	9	9	9
FALSE	High	[K].LNDLEDALQQAK.[E]	2xTMT6plex [N-Term; K12]		TRUE	9.0168e-05	0	1	3	22	P04264	P04264 [444-455]	0	1816.02	High	High	High	High	High	High	High	High	High	High	1.22	0.21	1.16	0.485	0.908	0.699	0.84	1.249	0.588	11210000	1926000	10660000	4456000	9190000	8344000	6428000	7720000	11480000	5402000	18	18	18	18	18	18
FALSE	High	[K].WELLQQVDTSTR.[T]	1xTMT6plex [N-Term]		TRUE	0.000327969	0	1	4	7	P04264	P04264 [212-223]	0	1704.91	High	High	High	High	High	High	High	High	High	High	4.901	0.537	2.099	1.379	0.6	1.775	0.559	1.955	0.614	7287000	798400	3121000	2051000	1487000	891700	2639000	830800	2906000	912300	3	3	3	3	3	3
FALSE	High	[K].KDVDGAYMTK.[V]	3xTMT6plex [N-Term; K1; K10]		TRUE	0.000495012	0	1	4	7	P04264	P04264 [289-298]	1	1815.03	High	High	High	High	High	High	High	High	High	High	2.033	0.443	1.398	0.64	0.607	1.105	0.88	1.407	0.496	11300000	2460000	7773000	3558000	5559000	3373000	6141000	4894000	7822000	2758000	5	5	5	5	5	5
FALSE	High	[K].LNDLEDALQQAKEDLAR.[L]	2xTMT6plex [N-Term; K12]; 1xDeamidated [Q9]		TRUE	0.00352919	0	1	2	1	P04264	P04264 [444-460]	1	2401.3	High	High	High	High	High	High	High	High	High	High	1.884	0.385	1.203	1.077	0.575	0.79	0.421	0.762	0.463	95950	19630	61290	54850	50940	29290	40260	21460	38810	23590	1	1	1	1	1	1
FALSE	High	[K].LNDLEDALQQAKEDLAR.[L]	2xTMT6plex [N-Term; K12]		TRUE	2.04801e-05	0	1	2	6	P04264	P04264 [444-460]	1	2400.31	High	High	High	High	High	High	High	High	High	High	2.365	0.618	1.445	1.219	0.6	1.008	0.553	0.869	0.504	806900	210800	493000	415900	341200	204600	344000	188600	296400	171900	6	6	6	6	6	6
FALSE	High	[K].LDNLQQEIDFLTALYQAELSQMQTQISETNVILSMDNNR.[SQ]	1xTMT6plex [N-Term]; 1xDeamidated [Q]; 2xOxidation [M22; M35]		TRUE	4.07789e-05	0	1	4	4	P04264	P04264 [305-343]	0	4789.34	High	High	High	High	High	High	Not Found	High	High	High
FALSE	High	[R].SLDLDSIIAEVKAQYEDIAQK.[S]	3xTMT6plex [N-Term; K12; K21]		TRUE	0.00035745	0	1	1	2	P04264	P04264 [344-364]	1	3036.71	High	High	High	High	High	High	High	High	High	High	1.21	15.196	1.5	2.52	1.823	1.218	2.472	4.905	4.089	11780	148000	14600	24540	9737	17750	11860	24070	47760	39820	2	2	2	2	2	2
FALSE	High	[R].GGGGGGYGSGGSSYGSGGGSYGSGGGGGGGR.[G]	1xTMT6plex [N-Term]		TRUE	1.49646e-06	0	1	3	1	P04264	P04264 [519-549]	0	2613.11	High	High	High	High	High	High	High	High	High	High	0.889	0.754	0.219	0.485	2.032	0.709	2.173	1.138	1.905	16830	14280	4142	9187	18930	38470	13410	41130	21540	36060	1	1	1	1	1	1
FALSE	High	[R].THNLEPYFESFINNLR.[R]	1xTMT6plex [N-Term]		TRUE	0.000110365	0	1	3	5	P04264	P04264 [224-239]	0	2223.14	High	High	High	High	High	High	High	High	High	High	1.443	1.442	1.967	1.295	1.126	0.984	0.953	1.791	1.071	179400	179200	244400	160900	124300	139900	122300	118500	222600	133100	4	4	4	4	4	4
FALSE	High	[R].SLVNLGGSK.[S]	2xTMT6plex [N-Term; K9]		TRUE	0.00839403	0	1	2	10	P04264	P04264 [66-74]	0	1332.83	High	High	High	High	High	High	High	High	High	High	1.741	0.566	0.443	0.388	0.46	0.482	0.518	0.847	0.285	29670000	9650000	7551000	6619000	17040000	7837000	8212000	8826000	14440000	4861000	7	7	7	7	7	7
FALSE	High	[K].YEELQITAGR.[H]	1xTMT6plex [N-Term]		TRUE	0.00300494	0	1	5	6	P04264	P04264 [377-386]	0	1408.76	High	High	High	High	High	High	High	High	High	High	3.294	0.494	1.48	1.126	0.819	0.966	0.714	0.654	0.365	13980000	2096000	6281000	4779000	4245000	3478000	4100000	3030000	2778000	1547000	2	2	2	2	2	2
FALSE	High	[KR].SLNNQFASFIDK.[V]	2xTMT6plex [N-Term; K12]		TRUE	0.000197142	0	1	4	9	P04264	P04264 [186-197]	0	1842.02	High	High	High	High	High	High	High	High	High	High	5.139	0.607	2.863	1.953	0.831	2.127	0.487	1.515	0.526	6558000	775000	3653000	2493000	1276000	1061000	2714000	621100	1934000	671700	6	6	6	6	6	6
FALSE	High	[K].AQYEDIAQK.[S]	2xTMT6plex [N-Term; K9]		TRUE	0.00858391	0	1	3	10	P04264	P04264 [356-364]	0	1523.85	High	High	High	High	High	High	High	High	High	High	1.714	0.585	1.105	0.628	0.71	0.753	0.83	1.21	1.008	4529000	1545000	2919000	1658000	2642000	1877000	1990000	2193000	3196000	2662000	5	5	5	5	5	5
FALSE	High	[K].AEAESLYQSK.[Y]	2xTMT6plex [N-Term; K10]		TRUE	0.00154975	0	1	4	7	P04264	P04264 [367-376]	0	1583.87	High	High	High	High	High	High	High	High	High	High	0.472	0.158	0.603	0.678	0.605	0.829	0.707	1.31	0.95	1219000	408800	1556000	1750000	2581000	1561000	2139000	1826000	3380000	2453000	1	1	1	1	1	1
FALSE	High	[R].SLDLDSIIAEVK.[A]	2xTMT6plex [N-Term; K12]		TRUE	9.15281e-05	0	1	7	23	P04264	P04264 [344-355]	0	1761.04	High	High	High	High	High	High	High	High	High	High	3.178	0.559	1.476	1.015	0.257	1.244	0.327	1.569	0.292	13150000	2314000	6109000	4200000	4138000	1062000	5149000	1353000	6493000	1208000	12	12	12	12	12	12
FALSE	High	[K].NKLNDLEDALQQAKEDLAR.[L]	3xTMT6plex [N-Term; K2; K14]		TRUE	0.000104339	0	1	2	5	P04264	P04264 [442-460]	2	2871.61	High	High	High	High	High	High	High	High	High	High	3.787	0.822	2.773	1.653	0.615	0.978	0.416	0.62	0.337	268900	58350	196900	117400	71010	43680	69460	29550	44030	23920	2	2	2	2	2	2
FALSE	High	[K].DVDGAYMTK.[V]	2xTMT6plex [N-Term; K9]		TRUE	0.0130262	0.00117917	1	4	2	P04264	P04264 [290-298]	0	1457.77	High	High	High	High	High	High	High	High	High	High	0.616	0.362	0.648	0.465	0.725	0.618	0.9	0.939	0.598	694700	408300	730100	524400	1127000	817000	696700	1015000	1059000	674300	2	2	2	2	2	2
FALSE	High	[KR].NKYEDEINK.[R]	3xTMT6plex [N-Term; K2; K9]		TRUE	0.0128338	0.00117917	3	25	7	125105; P04264; 1346344	125105 [256-264]; P04264 [268-276]; 1346344 [251-259]	1	1840.04	High	High	High	High	High	High	High	High	High	High	1.596	0.273	1.321	0.579	0.793	1.014	1.005	1.331	0.967	7240000	1240000	5996000	2628000	4537000	3600000	4603000	4558000	6041000	4389000	4	4	4	4	4	4
FALSE	High	[R].TLLEGEESR.[M]	1xTMT6plex [N-Term]		TRUE	0.0135701	0.00117917	1	4	9	P04264	P04264 [484-492]	0	1262.68	High	High	High	High	High	High	High	High	High	High	1.117	0.348	0.444	0.362	0.667	0.566	0.735	1.061	0.681	4436000	1380000	1763000	1435000	3970000	2646000	2247000	2919000	4211000	2704000	4	4	4	4	4	4
FALSE	High	[K].LALDIEIATYR.[KTR]	1xTMT6plex [N-Term]		TRUE	0.0396831	0.00171593	1	24	6	P04264	P04264 [473-483]	0	1506.87	High	High	High	High	High	High	High	High	High	High	1.891	0.914	2.149	1.145	0.898	1.481	0.689	1.336	0.858	170300	82330	193600	103200	90100	80900	133400	62040	120400	77280	2	2	2	2	2	2
FALSE	High	[R].GSGGGSSGGSIGGR.[G]	1xTMT6plex [N-Term]		TRUE	0.0880029	0.00171593	1	2	2	P04264	P04264 [603-616]	0	1321.67	High	High	High	High	High	High	High	High	High	High	2.601	1.333	0.787	0.924	1	0.792	1.524	1.018	0.791	134700	69020	40750	47820	51770	51750	41010	78900	52670	40970	2	2	2	2	2	2
FALSE	High	[R].DYQELMNTK.[L]	2xTMT6plex [N-Term; K9]; 1xOxidation [M6]		TRUE	0.0667877	0.00171593	1	4	4	P04264	P04264 [464-472]	0	1615.84	High	High	High	High	High	High	High	High	High	High	1.277	0.547	1.266	0.681	0.868	0.713	0.711	1.324	0.66	2367000	1015000	2346000	1263000	1854000	1610000	1323000	1318000	2454000	1224000	3	3	3	3	3	3
FALSE	High	[R].DYQELMNTK.[L]	2xTMT6plex [N-Term; K9]		TRUE	0.0667877	0.00171593	1	4	5	P04264	P04264 [464-472]	0	1599.85	High	High	High	High	High	High	High	High	High	High	1.457	0.358	1.097	0.441	0.738	0.783	0.819	1.253	0.717	1070000	262600	806100	323600	734500	542300	574900	601800	920400	527000	3	3	3	3	3	3
FALSE	High	[KR-].YEDEINK.[R]	2xTMT6plex [N-Term; K7]		TRUE	0.112298	0.00171593	4	40	4	125105; 254622; P04264; 1346344	125105 [258-264]; 254622 [274-280]; P04264 [270-276]; 1346344 [253-259]	0	1368.74	High	High	High	High	High	High	High	High	High	High	1.444	0.29	1.128	0.499	0.647	0.596	0.618	1.063	0.411	2672000	536200	2087000	923000	1851000	1197000	1103000	1143000	1967000	760700	1	1	1	1	1	1
FALSE	High	[K].SISISVAR.[G]	1xTMT6plex [N-Term]		TRUE	0.0958283	0.00171593	1	2	3	P04264	P04264 [75-82]	0	1061.65	High	High	High	High	High	High	High	High	High	High	3.972	1.637	1.328	0.979	1.03	1.104	1.057	1.056	0.721	9477000	3905000	3167000	2337000	2386000	2456000	2634000	2523000	2520000	1721000	3	3	3	3	3	3
FALSE	High	[K].NMQDMVEDYR.[N]	1xTMT6plex [N-Term]; 1xOxidation [M5]		TRUE	0.0677576	0.00171593	1	4	6	P04264	P04264 [258-267]	0	1545.69	High	High	High	High	High	High	High	High	High	High	0.912	0.346	0.866	0.598	0.816	0.62	0.791	1.262	0.785	858100	325700	814500	562400	940600	767200	583500	744400	1187000	738400	4	4	4	4	4	4
FALSE	High	[R].GSSSGGVK.[S]	2xTMT6plex [N-Term; K8]		TRUE	0.0948154	0.00171593	1	4	3	P04264	P04264 [617-624]	0	1136.67	High	High	High	High	High	High	High	High	High	High	1.195	0.724	0.409	0.611	0.867	0.658	1.285	0.832	0.873	149300	90540	51180	76420	125000	108300	82290	160700	104000	109200	1	1	1	1	1	1
FALSE	High	[R].SEIDNVKK.[Q]	3xTMT6plex [N-Term; K7; K8]		TRUE	0.063957	0.00171593	1	5	8	P04264	P04264 [410-417]	1	1619.99	High	High	High	High	High	High	High	High	High	High	1.074	0.229	0.932	0.549	0.767	0.745	0.718	1.124	0.529	13020000	2772000	11290000	6656000	12120000	9288000	9023000	8706000	13620000	6405000	6	6	6	6	6	6
FALSE	High	[KR].NKYEDEINKR.[T]	3xTMT6plex [N-Term; K2; K9]		TRUE	0.0233284	0.00171593	3	25	5	125105; P04264; 1346344	125105 [256-265]; P04264 [268-277]; 1346344 [251-260]	2	1996.14	High	High	High	High	High	High	High	High	High	High	0.744	0.168	0.982	0.579	0.564	0.712	0.537	0.949	0.297	6064000	1368000	8005000	4720000	8153000	4598000	5807000	4378000	7736000	2417000	3	3	3	3	3	3
FALSE	High	[K].NMQDMVEDYR.[N]	1xTMT6plex [N-Term]		TRUE	0.0378332	0.00171593	1	4	5	P04264	P04264 [258-267]	0	1529.69	High	High	High	High	High	High	High	High	High	High
FALSE	High	[R].SEIDNVK.[K]	2xTMT6plex [N-Term; K7]		TRUE	0.179504	0.00572593	1	5	4	P04264	P04264 [410-416]	0	1262.74	High	High	High	High	High	High	High	High	High	High
FALSE	High	[KR-].YEDEINKR.[TYA]	2xTMT6plex [N-Term; K7]		TRUE	0.187565	0.00804114	4	40	2	125105; 254622; P04264; 1346344	125105 [258-265]; 254622 [274-281]; P04264 [270-277]; 1346344 [253-260]	1	1524.84	High	High	High	High	High	High	High	High	High	High	2.588	1.691	0.972	0.648	1.196	0.791	0.83	1.437	0.666	1171000	764900	439900	293300	452400	541100	357800	375300	650100	301400	1	1	1	1	1	1
High	Master Protein	Q80Z19	Mucin-2 (Fragments) OS=Mus musculus GN=Muc2 PE=1 SV=2	FALSE	0	168.242	10	24	171	24	1	2680	293.242	5.62	High	High	High	High	High	High	High	High	High	High		17831		Muc2	7	cell death;regulation of biological process	extracellular	protein binding	Pf00007, Pf00094, Pf01826, Pf03045, Pf08742, Pf13330	0.447	0.869	0.606	0.989	1.091	0.829	0.992	1.612	1.475	22110000	42990000	29980000	48940000	49490000	53980000	41020000
Checked	Confidence	Annotated Sequence	Modifications	Modifications in Master Proteins	Contaminant	Qvality PEP	Qvality q-value	# Protein Groups	# Proteins	# PSMs	Master Protein Accessions	Positions in Master Proteins	# Missed Cleavages	Theo. MH+ [Da]	Found in Sample: [S1] F1: 126, Sample	Found in Sample: [S2] F1: 127N, Sample	Found in Sample: [S3] F1: 127C, Sample	Found in Sample: [S4] F1: 128N, Sample	Found in Sample: [S5] F1: 128C, Control	Found in Sample: [S6] F1: 129N, Sample	Found in Sample: [S7] F1: 129C, Sample	Found in Sample: [S8] F1: 130N, Sample	Found in Sample: [S9] F1: 130C, Sample	Found in Sample: [S10] F1: 131, Sample	Abundance Ratio: (F1, 126) / (F1, 128C)	Abundance Ratio: (F1, 127N) / (F1, 128C)	Abundance Ratio: (F1, 127C) / (F1, 128C)	Abundance Ratio: (F1, 128N) / (F1, 128C)	Abundance Ratio: (F1, 129N) / (F1, 128C)	Abundance Ratio: (F1, 129C) / (F1, 128C)	Abundance Ratio: (F1, 130N) / (F1, 128C)	Abundance Ratio: (F1, 130C) / (F1, 128C)	Abundance Ratio: (F1, 131) / (F1, 128C)	Abundance: F1: 126, Sample	Abundance: F1: 127N, Sample	Abundance: F1: 127C, Sample	Abundance: F1: 128N, Sample	Abundance: F1: 128C, Control	Abundance: F1: 129N, Sample	Abundance: F1: 129C, Sample	Abundance: F1: 130N, Sample	Abundance: F1: 130C, Sample	Abundance: F1: 131, Sample	Abundances Count: F1: 126, Sample	Abundances Count: F1: 127N, Sample	Abundances Count: F1: 127C, Sample	Abundances Count: F1: 128N, Sample	Abundances Count: F1: 128C, Control	Abundances Count: F1: 129N, Sample
FALSE	High	[R].EFGEHFEFDCK.[D]	2xTMT6plex [N-Term; K11]; 1xCarbamidomethyl [C10]		FALSE	0.00116619	0	1	1	7	Q80Z19	Q80Z19 [2326-2336]	0	1902.91	High	High	High	High	High	High	High	High	High	High	0.34	0.855	0.456	0.461	0.843	0.62	0.988	1.354	1.311	988000	2483000	1324000	1340000	2903000	2447000	1801000	2869000	3931000	3806000	4	4	4	4	4	4
FALSE	High	[K].FAPGYDVCVK.[T]	2xTMT6plex [N-Term; K10]; 1xCarbamidomethyl [C8]		FALSE	0.00544451	0	1	1	7	Q80Z19	Q80Z19 [2304-2313]	0	1613.88	High	High	High	High	High	High	High	High	High	High	0.506	0.81	0.64	0.913	1.025	0.714	0.766	1.523	1.261	683600	1095000	864000	1234000	1351000	1385000	964900	1035000	2058000	1704000	4	4	4	4	4	4
FALSE	High	[R].MMPIEVEVQVNK.[Q]	2xTMT6plex [N-Term; K12]		FALSE	0.000471506	0	1	1	8	Q80Z19	Q80Z19 [2060-2071]	0	1875.05	High	High	High	High	High	High	High	High	High	High	1.598	3.174	1.453	3.274	1.434	1.828	0.774	1.444	1.105	858100	1704000	780400	1758000	537000	770200	981800	415600	775200	593100	6	6	6	6	6	6
FALSE	High	[R].MMPIEVEVQVNK.[Q]	2xTMT6plex [N-Term; K12]; 2xOxidation [M1; M2]		FALSE	0.00602211	0	1	1	5	Q80Z19	Q80Z19 [2060-2071]	0	1907.04	High	High	High	High	High	High	High	High	High	High	1.331	2.299	1.084	1.865	1.194	1.277	0.992	1.592	1.252	553500	956400	450900	775700	416000	496900	531300	412700	662200	520800	3	3	3	3	3	3
FALSE	High	[K].GTVCGLCGNFDDQTK.[N]	2xTMT6plex [N-Term; K15]; 2xCarbamidomethyl [C4; C7]		FALSE	0.00348982	0	1	2	2	Q80Z19	Q80Z19 [983-997]	0	2130.04	High	High	High	High	High	High	High	High	High	High	0.606	1.464	0.656	0.706	1.304	1.298	2.119	1.297	1.35	108000	260900	116800	125700	178100	232300	231200	377500	231100	240400	1	1	1	1	1	1
FALSE	High	[R].VPCSAVSVMK.[E]	2xTMT6plex [N-Term; K10]; 1xCarbamidomethyl [C3]		FALSE	0.00237404	0	1	1	7	Q80Z19	Q80Z19 [2573-2582]	0	1535.87	High	High	High	High	High	High	High	High	High	High	0.922	2.469	1.531	3.042	1.385	3.136	2.628	4.549	2.699	1096000	2934000	1820000	3615000	1188000	1646000	3727000	3124000	5406000	3208000	6	6	6	6	6	6
FALSE	High	[K].QQYIILKPGEIHK.[N]	3xTMT6plex [N-Term; K7; K13]		FALSE	0.000967202	0	1	1	2	Q80Z19	Q80Z19 [2502-2514]	0	2254.39	High	High	High	High	High	High	High	High	High	High
FALSE	High	[R].AVMHSNIPLDQLGQIVVCNK.[E]	2xTMT6plex [N-Term; K20]; 1xCarbamidomethyl [C18]; 1xOxidation [M3]		FALSE	2.52722e-06	0	1	1	4	Q80Z19	Q80Z19 [1549-1568]	0	2710.48	High	High	High	High	High	High	High	High	High	High	1.166	1.605	1.389	2.07	1.256	0.906	0.894	1.891	1.217	216100	297500	257400	383700	185400	232900	168000	165800	350600	225700	3	3	3	3	3	3
FALSE	High	[R].AVMHSNIPLDQLGQIVVCNK.[E]	2xTMT6plex [N-Term; K20]; 1xDeamidated [Q]; 1xCarbamidomethyl [C18]; 1xOxidation [M3]		FALSE	1.92896e-05	0	1	1	2	Q80Z19	Q80Z19 [1549-1568]	0	2711.46	High	High	High	High	High	High	High	High	High	High	1.294	2.053	1.622	2.383	1.217	0.866	0.728	1.972	1.273	77360	122700	96990	142500	59790	72740	51800	43550	117900	76110	1	1	1	1	1	1
FALSE	High	[R].AVMHSNIPLDQLGQIVVCNK.[E]	2xTMT6plex [N-Term; K20]; 1xDeamidated [Q]; 1xCarbamidomethyl [C18]		FALSE	3.60406e-05	0	1	1	4	Q80Z19	Q80Z19 [1549-1568]	0	2695.47	High	High	High	High	High	High	High	High	High	High	1.81	2.941	1.943	3.947	1.163	1.2	1.253	2.176	1.636	232800	378300	249900	507600	128600	149600	154400	161100	279800	210400	3	3	3	3	3	3
FALSE	High	[R].AVMHSNIPLDQLGQIVVCNK.[E]	2xTMT6plex [N-Term; K20]; 1xCarbamidomethyl [C18]		FALSE	1.19545e-06	0	1	1	6	Q80Z19	Q80Z19 [1549-1568]	0	2694.48	High	High	High	High	High	High	High	High	High	High	1.472	2.738	1.621	3.642	1.417	1.398	1.287	2.586	1.644	311500	579300	342900	770600	211600	299800	295900	272200	547000	347800	5	5	5	5	5	5
FALSE	High	[K].IISDCEIAADEWLVNDPSKPHCPHK.[G]	3xTMT6plex [N-Term; K19; K25]; 2xCarbamidomethyl [C5; C22]		FALSE	1.14368e-07	0	1	1	12	Q80Z19	Q80Z19 [2145-2169]	0	3618.87	High	High	High	High	High	High	High	High	High	High	2.607	7.339	3.527	3.046	1.02	0.888	0.827	3.622	1.436	695500	1958000	940900	812600	266800	272200	236900	220500	966100	383200	4	4	4	4	4	4
FALSE	High	[K].IISDCEIAADEWLVNDPSKPHCPHK.[G]	3xTMT6plex [N-Term; K19; K25]; 1xDeamidated [N15]; 2xCarbamidomethyl [C5; C22]		FALSE	1.43703e-07	0	1	1	1	Q80Z19	Q80Z19 [2145-2169]	0	3619.85	High	High	High	High	High	High	High	High	High	High
FALSE	High	[K].ISYNGLSFSIR.[L]	1xTMT6plex [N-Term]; 1xDeamidated [N4]		FALSE	0.00390407	0	1	1	5	Q80Z19	Q80Z19 [2103-2113]	0	1486.81	High	High	High	High	High	High	High	High	High	High	0.155	0.238	0.309	0.345	1.047	0.82	1.361	1.325	1.533	477800	731500	949900	1062000	3077000	3223000	2525000	4187000	4077000	4717000	4	4	4	4	4	4
FALSE	High	[K].AERPTCLLGFEVK.[T]	2xTMT6plex [N-Term; K13]; 1xCarbamidomethyl [C6]		FALSE	0.000592415	0	1	1	5	Q80Z19	Q80Z19 [2394-2406]	0	1978.12	High	High	High	High	High	High	High	High	High	High	2.253	3.508	3.689	4.736	1.171	0.726	0.755	1.066	0.836	1300000	2024000	2129000	2733000	577100	675900	418700	435900	615200	482600	3	3	3	3	3	3
FALSE	High	[K].EISYNGCTK.[N]	2xTMT6plex [N-Term; K9]; 1xDeamidated [N5]; 1xCarbamidomethyl [C7]		FALSE	0.00917961	0	1	1	16	Q80Z19	Q80Z19 [2583-2591]	0	1530.79	High	High	High	High	High	High	High	High	High	High	0.128	0.277	0.16	0.369	0.708	0.618	1.013	1.725	1.911	1256000	2722000	1573000	3625000	9830000	6960000	6073000	9957000	16960000	18790000	14	14	14	14	14	14
FALSE	High	[K].CQQTHCIIEGPK.[Q]	2xTMT6plex [N-Term; K12]; 2xCarbamidomethyl [C1; C6]		FALSE	0.003569	0	1	1	1	Q80Z19	Q80Z19 [2490-2501]	0	1929.01	High	High	High	High	High	High	High	High	High	High	0.765	1.372	1.055	1.125	1.287	0.919	1.262	1.472	1.286	211300	378800	291400	310800	276100	355400	253700	348400	406500	355200	1	1	1	1	1	1
FALSE	High	[K].NEDQEIGGIIPMR.[M]	1xTMT6plex [N-Term]		FALSE	0.000207748	0	1	1	10	Q80Z19	Q80Z19 [1576-1588]	0	1700.88	High	High	High	High	High	High	High	High	High	High	0.327	0.457	0.387	0.698	1.275	0.595	0.877	1.549	1.355	829700	1159000	981700	1768000	2534000	3231000	1508000	2222000	3924000	3433000	8	8	8	8	8	8
FALSE	High	[K].NEDQEIGGIIPMR.[M]	1xTMT6plex [N-Term]; 1xOxidation [M12]		FALSE	0.00618158	0	1	1	6	Q80Z19	Q80Z19 [1576-1588]	0	1716.88	High	High	High	High	High	High	High	High	High	High	0.439	0.615	0.349	0.597	1.227	0.622	1.262	1.352	1.191	496700	694900	394300	675300	1131000	1387000	702900	1426000	1528000	1347000	5	5	5	5	5	5
FALSE	High	[R].HETQEVQIK.[T]	2xTMT6plex [N-Term; K9]		FALSE	0.010189	0.00117917	1	1	10	Q80Z19	Q80Z19 [2048-2056]	0	1569.9	High	High	High	High	High	High	High	High	High	High	1.451	2.795	1.92	3.346	2.57	1.848	1.255	2.602	1.761	4590000	8838000	6072000	10580000	3163000	8128000	5843000	3969000	8230000	5569000	5	5	5	5	5	5
FALSE	High	[K].LSWEELGQK.[V]	2xTMT6plex [N-Term; K9]		FALSE	0.012504	0.00117917	1	1	5	Q80Z19	Q80Z19 [1339-1347]	0	1547.88	High	High	High	High	High	High	High	High	High	High	0.426	0.799	0.754	0.918	1.101	0.611	0.549	1.23	1.145	1509000	2836000	2676000	3256000	3547000	3904000	2168000	1946000	4363000	4063000	5	5	5	5	5	5
FALSE	High	[K].QLVALPYKK.[Y]	3xTMT6plex [N-Term; K8; K9]		FALSE	0.0095994	0.00117917	1	1	4	Q80Z19	Q80Z19 [2072-2080]	1	1747.14	High	High	High	High	High	High	High	High	High	High	0.309	0.566	0.598	1.95	0.694	1.103	0.867	0.964	0.67	624300	1144000	1208000	3942000	2022000	1403000	2230000	1754000	1948000	1354000	3	3	3	3	3	3
FALSE	High	[K].EISYNGCTK.[N]	2xTMT6plex [N-Term; K9]; 1xCarbamidomethyl [C7]		FALSE	0.0254957	0.00171593	1	1	1	Q80Z19	Q80Z19 [2583-2591]	0	1529.8	High	High	High	High	High	High	High	High	High	High	0.124	0.318	0.153	0.377	0.799	0.705	1.091	1.773	1.783	114900	295100	141800	350300	928000	741000	654500	1012000	1646000	1655000	1	1	1	1	1	1
FALSE	High	[R].CPEDRPIYDEDLKK.[C]	3xTMT6plex [N-Term; K13; K14]; 1xCarbamidomethyl [C1]		FALSE	0.0873788	0.00171593	1	1	2	Q80Z19	Q80Z19 [1164-1177]	1	2465.33	High	High	High	High	High	High	High	High	High	High	0.946	1.849	0.976	0.945	0.939	0.659	0.629	1.29	0.984	1394000	2724000	1437000	1392000	1473000	1383000	971300	926400	1901000	1449000	2	2	2	2	2	2
FALSE	High	[K].IECHPDEGK.[I]	2xTMT6plex [N-Term; K9]; 1xCarbamidomethyl [C3]		FALSE	0.0588498	0.00171593	1	1	13	Q80Z19	Q80Z19 [1216-1224]	0	1542.8	High	High	High	High	High	High	High	High	High	High	0.205	0.502	0.256	0.373	0.733	0.767	1.016	1.679	1.084	553000	1355000	692400	1008000	2702000	1981000	2071000	2745000	4536000	2928000	8	8	8	8	8	8
FALSE	High	[K].TCGCVGPDNVPR.[E]	1xTMT6plex [N-Term]; 2xCarbamidomethyl [C2; C4]		FALSE	0.031011	0.00171593	1	1	1	Q80Z19	Q80Z19 [2314-2325]	0	1560.75	High	High	High	High	High	High	High	High	High	High	0.383	0.834	0.465	0.648	1.309	0.733	1.535	1.378	2.052	42520	92710	51720	72060	111100	145400	81410	170500	153100	228000	1	1	1	1	1	1
FALSE	High	[K].QLVALPYK.[K]	2xTMT6plex [N-Term; K8]		FALSE	0.0471351	0.00171593	1	1	9	Q80Z19	Q80Z19 [2072-2079]	0	1389.89	High	High	High	High	High	High	High	High	High	High	0.112	0.194	0.191	0.316	1.284	0.555	0.788	1.173	1.432	472600	823300	808700	1336000	4234000	5437000	2349000	3338000	4966000	6062000	3	4	4	4	4	4
FALSE	High	[K].AEACVFWR.[T]	1xTMT6plex [N-Term]; 1xCarbamidomethyl [C4]		FALSE	0.092491	0.00171593	1	2	2	Q80Z19	Q80Z19 [1102-1109]	0	1267.65	High	High	High	High	High	High	High	High	High	High	0.723	1.242	1.381	2.466	1.066	1.208	0.823	1.88	1.331	352400	604800	672800	1201000	487200	519300	588700	400700	915700	648600	1	1	1	1	1	1
FALSE	High	[R].MMPIEVEVQVNK.[Q]	2xTMT6plex [N-Term; K12]; 1xOxidation [M]		FALSE	0.0319397	0.00171593	1	1	6	Q80Z19	Q80Z19 [2060-2071]	0	1891.04	High	High	High	High	High	High	High	High	High	High	1.07	2.1	1.001	1.862	1.434	1.229	1.292	1.158	1.177	289600	568300	271100	503900	270700	388200	332700	349800	313400	318600	3	3	3	3	3	3
FALSE	High	[K].IFIGGTELK.[L]	2xTMT6plex [N-Term; K9]		FALSE	0.147259	0.00250807	1	1	1	Q80Z19	Q80Z19 [919-927]	0	1435.89	High	High	High	High	High	High	High	High	High	High	0.456	0.732	0.607	0.756	1.685	0.533	0.727	1.045	1.003	71580	114900	95240	118700	156900	264500	83640	114100	164000	157400	1	1	1	1	1	1
FALSE	High	[K].SGDFELIK.[G]	2xTMT6plex [N-Term; K8]		FALSE	0.149299	0.00250807	1	1	3	Q80Z19	Q80Z19 [1526-1533]	0	1366.8	High	High	High	High	High	High	High	High	High	High	0.306	0.535	0.389	0.725	1.245	0.546	1.023	1.684	1.763	968100	1691000	1231000	2294000	3162000	3936000	1727000	3236000	5326000	5576000	3	3	3	3	3	3
FALSE	High	[K].TEIVPGK.[C]	2xTMT6plex [N-Term; K7]		FALSE	0.163763	0.00332358	1	1	4	Q80Z19	Q80Z19 [2407-2413]	0	1201.76	High	High	High	High	High	High	High	High	High	High	0.309	0.597	0.445	0.52	0.803	0.545	0.614	1.032	1.061	735000	1421000	1058000	1239000	2380000	1912000	1298000	1460000	2456000	2526000	2	2	2	2	2	2
High	Master Protein	F8VPQ6	Alkaline phosphatase OS=Mus musculus GN=Alpi PE=3 SV=1	FALSE	0	135.252	44.4043	20	144	14	1	554	59.495	6.1	High	High	High	High	High	High	High	High	High	High		76768	ENSMUSG00000079440	Alpi	1	metabolic process;response to stimulus	cell surface	catalytic activity;metal ion binding;protein binding	Pf00245	0.582	1.085	0.494	1.663	1.564	1.912	3.23	2.392	2.798	6843000	12760000	5808000	19560000	11760000	18390000	22480000
Checked	Confidence	Annotated Sequence	Modifications	Modifications in Master Proteins	Contaminant	Qvality PEP	Qvality q-value	# Protein Groups	# Proteins	# PSMs	Master Protein Accessions	Positions in Master Proteins	# Missed Cleavages	Theo. MH+ [Da]	Found in Sample: [S1] F1: 126, Sample	Found in Sample: [S2] F1: 127N, Sample	Found in Sample: [S3] F1: 127C, Sample	Found in Sample: [S4] F1: 128N, Sample	Found in Sample: [S5] F1: 128C, Control	Found in Sample: [S6] F1: 129N, Sample	Found in Sample: [S7] F1: 129C, Sample	Found in Sample: [S8] F1: 130N, Sample	Found in Sample: [S9] F1: 130C, Sample	Found in Sample: [S10] F1: 131, Sample	Abundance Ratio: (F1, 126) / (F1, 128C)	Abundance Ratio: (F1, 127N) / (F1, 128C)	Abundance Ratio: (F1, 127C) / (F1, 128C)	Abundance Ratio: (F1, 128N) / (F1, 128C)	Abundance Ratio: (F1, 129N) / (F1, 128C)	Abundance Ratio: (F1, 129C) / (F1, 128C)	Abundance Ratio: (F1, 130N) / (F1, 128C)	Abundance Ratio: (F1, 130C) / (F1, 128C)	Abundance Ratio: (F1, 131) / (F1, 128C)	Abundance: F1: 126, Sample	Abundance: F1: 127N, Sample	Abundance: F1: 127C, Sample	Abundance: F1: 128N, Sample	Abundance: F1: 128C, Control	Abundance: F1: 129N, Sample	Abundance: F1: 129C, Sample	Abundance: F1: 130N, Sample	Abundance: F1: 130C, Sample	Abundance: F1: 131, Sample	Abundances Count: F1: 126, Sample	Abundances Count: F1: 127N, Sample	Abundances Count: F1: 127C, Sample	Abundances Count: F1: 128N, Sample	Abundances Count: F1: 128C, Control	Abundances Count: F1: 129N, Sample
FALSE	High	[R].QVPDSAGTATAYLCGVK.[A]	2xTMT6plex [N-Term; K17]; 1xCarbamidomethyl [C14]		FALSE	0.000376678	0	1	1	2	F8VPQ6	F8VPQ6 [108-124]	0	2196.17	High	High	High	High	High	High	High	High	High	High
FALSE	High	[K].QQAAVPLSSETHGGEDVAIFAR.[G]	1xTMT6plex [N-Term]		FALSE	4.05009e-06	0	1	1	6	F8VPQ6	F8VPQ6 [441-462]	0	2512.3	High	High	High	High	High	High	High	High	High	High	0.526	0.848	0.462	1.01	1.534	1.584	1.416	2.139	1.985	146000	235600	128400	280500	277800	426200	440100	393400	594200	551600	3	3	3	3	3	3
FALSE	High	[R].NPSVDPSLAEMTEVAVR.[M]	1xTMT6plex [N-Term]		FALSE	2.84696e-05	0	1	1	10	F8VPQ6	F8VPQ6 [301-317]	0	2044.06	High	High	High	High	High	High	High	High	High	High	1.461	2.034	1.643	3.036	1.557	2.53	1.349	1.814	1.475	1198000	1668000	1348000	2490000	820200	1277000	2075000	1106000	1488000	1210000	8	8	8	8	8	8
FALSE	High	[R].NPQGFYLFVEGGR.[I]	1xTMT6plex [N-Term]		FALSE	0.000437504	0	1	1	12	F8VPQ6	F8VPQ6 [322-334]	0	1712.9	High	High	High	High	High	High	High	High	High	High	0.146	0.216	0.234	1.588	1.641	2.243	2.412	2.833	2.858	363600	535700	582400	3946000	2486000	4080000	5575000	5997000	7043000	7104000	9	10	10	10	10	10
FALSE	High	[R].NWYSDAEMPASALQDGCK.[D]	2xTMT6plex [N-Term; K18]; 1xCarbamidomethyl [C17]		FALSE	0.00214596	0	1	1	1	F8VPQ6	F8VPQ6 [187-204]	0	2501.18	High	High	High	High	High	High	High	High	High	High	1.066	1.739	0.686	1.668	1.349	1.088	1.302	0.919	1.177	107000	174600	68830	167500	100400	135400	109200	130700	92230	118100	1	1	1	1	1	1
FALSE	High	[K].SYTSILYGNGPGYELK.[S]	2xTMT6plex [N-Term; K16]		FALSE	0.00124277	0	1	1	2	F8VPQ6	F8VPQ6 [407-422]	0	2220.2	High	High	High	High	High	High	High	High	High	High	0.712	1.106	0.723	1.39	1.489	1.939	2.032	2.719	3.343	37240	57860	37820	72720	52330	77900	101500	106400	142300	174900	1	1	1	1	1	1
FALSE	High	[K].SYTSILYGNGPGYELK.[S]	2xTMT6plex [N-Term; K16]; 1xDeamidated [N9]		FALSE	0.00018638	0	1	1	4	F8VPQ6	F8VPQ6 [407-422]	0	2221.18	High	High	High	High	High	High	High	High	High	High	0.695	1.313	0.793	2.034	1.31	1.941	2.187	3.5	4.514	115000	217300	131300	336700	165500	216900	321300	362000	579400	747300	2	2	2	2	2	2
FALSE	High	[R].GTSIFGLAPLK.[A]	2xTMT6plex [N-Term; K11]		FALSE	0.00174686	0	1	1	17	F8VPQ6	F8VPQ6 [391-401]	0	1561.97	High	High	High	High	High	High	High	High	High	High	0.188	0.271	0.288	0.995	1.391	1.161	4.095	1.826	2.685	519900	750100	797900	2756000	2769000	3853000	3216000	11340000	5058000	7436000	11	11	11	11	11	11
FALSE	High	[K].KLQPIQTSAK.[N]	3xTMT6plex [N-Term; K1; K10]		FALSE	0.000706332	0	2	3	6	F8VQM0; F8VPQ6	F8VQM0 [44-53]; F8VPQ6 [45-54]	1	1801.15	High	High	High	High	High	High	High	High	High	High	1.577	2.506	0.973	3.233	1.771	2.797	2.023	2.418	2.472	2209000	3511000	1363000	4528000	1401000	2481000	3917000	2834000	3387000	3463000	4	4	4	4	4	4
FALSE	High	[K].GQLEGHLGPETPLAMDLFPYMALSK.[T]	2xTMT6plex [N-Term; K25]		FALSE	0.000265958	0	1	1	5	F8VPQ6	F8VPQ6 [77-101]	0	3173.68	High	High	High	High	High	High	High	High	High	High	1.42	1.673	2.249	4.267	1.36	2.52	1.217	2.475	2.06	67500	79520	106900	202800	47530	64650	119800	57850	117600	97930	4	4	4	4	4	4
FALSE	High	[KR].KAAEALDAAK.[K]	3xTMT6plex [N-Term; K1; K10]		FALSE	0.000203896	0	2	4	9	F8VQM0; F8VPQ6	F8VQM0 [34-43]; F8VPQ6 [35-44]	1	1675.04	High	High	High	High	High	High	High	High	High	High	1.351	1.365	2.812	2.105	1.828	2.058	2.989	3.139	3.754	2536000	2564000	5279000	3952000	1877000	3432000	3864000	5612000	5894000	7048000	5	5	5	5	5	5
FALSE	High	[R].SELIQASQDPAVTHLMGLFEPTEMK.[Y]	2xTMT6plex [N-Term; K25]; 1xDeamidated [Q8]		FALSE	0.000917839	0	1	1	3	F8VPQ6	F8VPQ6 [271-295]	0	3231.67	High	High	High	High	High	High	High	High	High	High
FALSE	High	[R].SELIQASQDPAVTHLMGLFEPTEMK.[Y]	2xTMT6plex [N-Term; K25]		FALSE	1.36278e-06	0	1	1	8	F8VPQ6	F8VPQ6 [271-295]	0	3230.68	High	High	High	High	High	High	High	High	High	High	3.919	7.565	2.29	6.17	1.891	2.452	0.728	1.974	1.648	140700	271600	82200	221500	35900	67900	88030	26130	70850	59160	5	5	5	5	5	5
FALSE	High	[K].AAEALDAAK.[K]	2xTMT6plex [N-Term; K9]		FALSE	0.00907754	0	2	4	11	F8VQM0; F8VPQ6	F8VQM0 [35-43]; F8VPQ6 [36-44]	0	1317.78	High	High	High	High	High	High	High	High	High	High	0.41	0.769	0.284	0.911	1.928	1.353	2.105	1.989	2.638	2939000	5511000	2038000	6526000	7167000	13820000	9697000	15090000	14260000	18900000	7	7	7	7	7	7
FALSE	High	[K].GTPDPEYPSDSNQSGTR.[L]	1xTMT6plex [N-Term]		FALSE	0.00331181	0	1	1	8	F8VPQ6	F8VPQ6 [231-247]	0	2036.94	High	High	High	High	High	High	High	High	High	High	0.512	0.942	0.3	0.7	1.496	0.906	3.586	1.357	2.751	131000	241000	76670	178900	255800	382600	231600	917200	347100	703500	5	5	5	5	5	5
FALSE	High	[R].LDDQNLVQTWLSK.[H]	2xTMT6plex [N-Term; K13]		FALSE	2.36989e-05	0	1	1	11	F8VPQ6	F8VPQ6 [248-260]	0	2018.13	High	High	High	High	High	High	High	High	High	High	3.245	6.192	1.431	9.049	1.889	6.02	2.047	5.292	3.366	1328000	2534000	585800	3704000	409300	773300	2464000	837700	2166000	1378000	8	8	8	8	8	8
FALSE	High	[K].LQPIQTSAK.[N]	2xTMT6plex [N-Term; K9]		FALSE	0.0095994	0.00117917	2	3	5	F8VQM0; F8VPQ6	F8VQM0 [45-53]; F8VPQ6 [46-54]	0	1443.89	High	High	High	High	High	High	High	High	High	High	2.682	5.879	1.499	7.963	1.891	5.316	1.53	2.582	1.628	3482000	7633000	1947000	10340000	1298000	2456000	6902000	1986000	3352000	2114000	4	4	4	4	4	4
FALSE	High	[R].NWYSDAEMPASALQDGCK.[D]	2xTMT6plex [N-Term; K18]; 1xDeamidated [Q14]; 1xCarbamidomethyl [C17]		FALSE	0.0123193	0.00117917	1	1	1	F8VPQ6	F8VPQ6 [187-204]	0	2502.17	High	High	High	High	High	High	High	High	High	High	1.095	1.826	0.879	1.562	1.233	1.503	1.917	1.077	1.473	79710	132900	63990	113700	72790	89750	109400	139500	78410	107200	1	1	1	1	1	1
FALSE	High	[K].AAEALDAAKK.[L]	3xTMT6plex [N-Term; K9; K10]		FALSE	0.0326541	0.00171593	2	4	3	F8VQM0; F8VPQ6	F8VQM0 [35-44]; F8VPQ6 [36-45]	1	1675.04	High	High	High	High	High	High	High	High	High	High	1.671	4.004	0.882	3.53	1.53	1.907	1.497	1.435	1.661	789600	1893000	417000	1669000	472600	723100	901400	707400	678200	784800	1	1	1	1	1	1
FALSE	High	[K].SVGVVTTTR.[V]	1xTMT6plex [N-Term]		FALSE	0.0275546	0.00171593	2	3	4	F8VQM0; F8VPQ6	F8VQM0 [161-169]; F8VPQ6 [162-170]	0	1148.68	High	High	High	High	High	High	High	High	High	High	0.887	1.343	0.734	2.245	1.111	2.034	1.778	2.625	2.241	5216000	7899000	4317000	13200000	5880000	6531000	11960000	10450000	15430000	13170000	4	4	4	4	4	4
FALSE	High	[K].TIGLSAAAR.[FL]	1xTMT6plex [N-Term]		FALSE	0.0584247	0.00171593	1	2	5	F8VPQ6	F8VPQ6 [129-137]	0	1088.66	High	High	High	High	High	High	High	High	High	High	0.654	1.04	0.654	1.246	1.747	1.56	1.531	2.202	1.938	305100	485000	305000	581000	466400	814700	727400	713800	1027000	903600	1	1	1	1	1	1
FALSE	High	[K].ASQLTNEK.[D]	2xTMT6plex [N-Term; K8]		FALSE	0.0383932	0.00171593	1	1	5	F8VPQ6	F8VPQ6 [361-368]	0	1348.78	High	High	High	High	High	High	High	High	High	High	1.305	3.105	0.908	2.306	1.401	2.29	1.854	4.167	3.452	1611000	3833000	1121000	2847000	1235000	1730000	2827000	2289000	5144000	4262000	4	4	4	4	4	4
FALSE	High	[R].NPSVDPSLAEMTEVAVR.[M]	1xTMT6plex [N-Term]; 1xDeamidated [N1]		FALSE	0.0501515	0.00171593	1	1	1	F8VPQ6	F8VPQ6 [301-317]	0	2045.04	High	High	High	High	High	High	High	High	High	High
FALSE	High	[R].KFMFPK.[G]	3xTMT6plex [N-Term; K1; K6]		FALSE	0.150846	0.00250807	1	2	4	F8VPQ6	F8VPQ6 [225-230]	1	1484.93	High	High	High	High	High	High	High	High	High	High	0.265	0.597	0.133	0.632	1.718	1.583	5.31	1.627	3.143	676000	1525000	340000	1612000	2553000	4385000	4040000	13560000	4152000	8022000	4	4	4	4	4	4
FALSE	High	[K].GQLEGHLGPETPLAMDLFPYMALSK.[T]	2xTMT6plex [N-Term; K25]; 1xDeamidated [Q2]		FALSE	0.146753	0.00250807	1	1	1	F8VPQ6	F8VPQ6 [77-101]	0	3174.66	High	High	High	High	High	High	High	High	High	High	1.688	1.908	3.123	4.442	1.102	3.295	0.688	2.252	1.69	17100	19340	31660	45020	10130	11170	33390	6976	22820	17130	1	1	1	1	1	1
High	Master Protein	Q9CQ52	Chymotrypsin-like elastase family member 3B OS=Mus musculus GN=Cela3b PE=2 SV=1	FALSE	0	124.306	59.8513	11	171	11	1	269	28.886	5.87	High	High	High	High	High	High	High	High	High	High		67868	ENSMUSG00000023433	Cela3b	4	metabolic process		catalytic activity	Pf00089	0.068	0.124	0.069	0.461	1.359	1.541	2.621	1.235	3.784	11200000	20300000	11370000	75540000	164000000	222800000	252700000
Checked	Confidence	Annotated Sequence	Modifications	Modifications in Master Proteins	Contaminant	Qvality PEP	Qvality q-value	# Protein Groups	# Proteins	# PSMs	Master Protein Accessions	Positions in Master Proteins	# Missed Cleavages	Theo. MH+ [Da]	Found in Sample: [S1] F1: 126, Sample	Found in Sample: [S2] F1: 127N, Sample	Found in Sample: [S3] F1: 127C, Sample	Found in Sample: [S4] F1: 128N, Sample	Found in Sample: [S5] F1: 128C, Control	Found in Sample: [S6] F1: 129N, Sample	Found in Sample: [S7] F1: 129C, Sample	Found in Sample: [S8] F1: 130N, Sample	Found in Sample: [S9] F1: 130C, Sample	Found in Sample: [S10] F1: 131, Sample	Abundance Ratio: (F1, 126) / (F1, 128C)	Abundance Ratio: (F1, 127N) / (F1, 128C)	Abundance Ratio: (F1, 127C) / (F1, 128C)	Abundance Ratio: (F1, 128N) / (F1, 128C)	Abundance Ratio: (F1, 129N) / (F1, 128C)	Abundance Ratio: (F1, 129C) / (F1, 128C)	Abundance Ratio: (F1, 130N) / (F1, 128C)	Abundance Ratio: (F1, 130C) / (F1, 128C)	Abundance Ratio: (F1, 131) / (F1, 128C)	Abundance: F1: 126, Sample	Abundance: F1: 127N, Sample	Abundance: F1: 127C, Sample	Abundance: F1: 128N, Sample	Abundance: F1: 128C, Control	Abundance: F1: 129N, Sample	Abundance: F1: 129C, Sample	Abundance: F1: 130N, Sample	Abundance: F1: 130C, Sample	Abundance: F1: 131, Sample	Abundances Count: F1: 126, Sample	Abundances Count: F1: 127N, Sample	Abundances Count: F1: 127C, Sample	Abundances Count: F1: 128N, Sample	Abundances Count: F1: 128C, Control	Abundances Count: F1: 129N, Sample
FALSE	High	[R].VSAFIDWIEETIANN.[-]	1xTMT6plex [N-Term]; 1xDeamidated [N]		FALSE	0.00460196	0	1	2	7	Q9CQ52	Q9CQ52 [255-269]	0	1951.99	High	High	High	High	High	High	High	High	High	High	1.736	2.119	0.912	3.336	0.802	3.123	0.556	2.297	2.254	13530	16530	7113	26010	7798	6251	24350	4338	17920	17580	1	1	1	1	1	1
FALSE	High	[R].VVNGEEAVPHSWPWQVSLQYEK.[D]	2xTMT6plex [N-Term; K22]; 2xDeamidated [N3; Q15]		FALSE	0.00323833	0	1	1	1	Q9CQ52	Q9CQ52 [28-49]	0	3042.56	High	High	High	High	High	High	High	High	High	High
FALSE	High	[R].VVNGEEAVPHSWPWQVSLQYEK.[D]	2xTMT6plex [N-Term; K22]; 1xDeamidated [N/Q]		FALSE	3.33162e-05	0	1	1	6	Q9CQ52	Q9CQ52 [28-49]	0	3041.58	High	High	High	High	High	High	High	High	High	High	0.977	1.152	0.937	5.752	1.962	1.447	1.362	1.444	2.39	137100	161700	131500	807300	140300	275400	203000	191100	202600	335400	5	5	5	5	5	5
FALSE	High	[R].VVNGEEAVPHSWPWQVSLQYEK.[D]	2xTMT6plex [N-Term; K22]		FALSE	7.34393e-06	0	1	1	7	Q9CQ52	Q9CQ52 [28-49]	0	3040.59	High	High	High	High	High	High	High	High	High	High	0.695	0.917	0.664	3.861	2.229	1.847	2.23	1.665	3.71	119200	157200	113900	662000	171500	382200	316600	382400	285400	636200	4	4	4	4	4	4
FALSE	High	[R].VSAFIDWIEETIANN.[-]	1xTMT6plex [N-Term]		FALSE	0.00438372	0	1	2	11	Q9CQ52	Q9CQ52 [255-269]	0	1951	High	High	High	High	High	High	High	High	High	High	1.144	1.717	0.819	7.312	1.626	3.615	1.397	1.805	3.136	44160	66240	31590	282100	38580	62730	139500	53900	69620	121000	6	6	4	6	5	6
FALSE	High	[R].GVEEGQEQVIPINAGDLFVHPK.[W]	2xTMT6plex [N-Term; K22]		FALSE	1.70482e-05	0	1	1	9	Q9CQ52	Q9CQ52 [90-111]	0	2834.55	High	High	High	High	High	High	High	High	High	High	0.571	0.88	0.575	3.704	1.703	0.867	1.685	0.834	2.466	402900	621200	405700	2614000	705800	1202000	611800	1189000	588300	1740000	7	7	7	7	7	7
FALSE	High	[R].LSTNGPLPDKLQQALLPVVDYEHCSR.[W]	2xTMT6plex [N-Term; K10]; 1xDeamidated [N/Q]; 1xCarbamidomethyl [C24]		FALSE	1.38763e-05	0	1	1	15	Q9CQ52	Q9CQ52 [164-189]	1	3409.82	High	High	High	High	High	High	High	High	High	High	0.816	1.171	0.892	2.647	1.205	2.147	0.877	2.573	1.501	226700	325500	248000	735700	277900	334900	596900	243600	715000	417300	8	8	8	8	8	8
FALSE	High	[R].LSTNGPLPDKLQQALLPVVDYEHCSR.[W]	2xTMT6plex [N-Term; K10]; 1xCarbamidomethyl [C24]		FALSE	4.90194e-06	0	1	1	7	Q9CQ52	Q9CQ52 [164-189]	1	3408.83	High	High	High	High	High	High	High	High	High	High	0.339	0.531	0.446	1.127	0.889	0.991	1.117	2.357	1.361	104200	162900	137000	346000	306900	272800	304200	342800	723300	417500	5	5	5	5	5	5
FALSE	High	[K].WNSMCVSCGNDIALVK.[L]	2xTMT6plex [N-Term; K16]; 2xCarbamidomethyl [C5; C8]		FALSE	7.20311e-05	0	1	1	5	Q9CQ52	Q9CQ52 [112-127]	0	2312.16	High	High	High	High	High	High	High	High	High	High	1.546	1.376	1.411	3.189	1.528	3.463	1.467	1.503	1.848	502400	447100	458600	1037000	325000	496600	1126000	476700	488700	600500	5	5	5	5	5	5
FALSE	High	[K].WNSMCVSCGNDIALVK.[L]	2xTMT6plex [N-Term; K16]; 2xCarbamidomethyl [C5; C8]; 1xOxidation [M4]		FALSE	0.00184079	0	1	1	8	Q9CQ52	Q9CQ52 [112-127]	0	2328.16	High	High	High	High	High	High	High	High	High	High	0.639	0.701	0.597	1.772	2.218	2.202	1.122	1.421	1.494	277400	304300	259200	769400	434100	963000	955800	487300	616800	648500	4	4	4	4	4	4
FALSE	High	[K].LQQALLPVVDYEHCSR.[W]	1xTMT6plex [N-Term]; 1xCarbamidomethyl [C14]		FALSE	6.06771e-06	0	1	2	18	Q9CQ52	Q9CQ52 [174-189]	0	2157.13	High	High	High	High	High	High	High	High	High	High	0.97	0.706	0.852	0.837	1.155	1.572	1.155	2.142	1.962	1453000	1058000	1277000	1254000	1498000	1730000	2356000	1730000	3209000	2939000	11	11	11	11	11	11
FALSE	High	[K].LQQALLPVVDYEHCSR.[W]	1xTMT6plex [N-Term]; 1xDeamidated [Q3]; 1xCarbamidomethyl [C14]		FALSE	0.0012289	0	1	2	2	Q9CQ52	Q9CQ52 [174-189]	0	2158.12	High	High	High	High	High	High	High	High	High	High	0.507	0.91	0.575	0.633	1.66	0.764	0.957	1.115	0.99	87260	156600	98990	109000	172100	285600	131500	164600	191800	170300	2	2	2	2	2	2
FALSE	High	[R].TYQVVLGEHER.[G]	1xTMT6plex [N-Term]		FALSE	0.00165771	0	1	1	13	Q9CQ52	Q9CQ52 [79-89]	0	1559.84	High	High	High	High	High	High	High	High	High	High	1.159	1.626	0.811	1.731	1.549	2.536	1.54	2.209	2.426	2642000	3707000	1849000	3948000	2280000	3533000	5782000	3511000	5037000	5532000	9	9	9	9	9	9
FALSE	High	[R].WNWWGLSVK.[T]	2xTMT6plex [N-Term; K9]		FALSE	0.00776175	0	1	1	2	Q9CQ52	Q9CQ52 [190-198]	0	1633.93	High	High	High	High	High	High	High	High	High	High	0.442	0.804	0.587	0.8	2.3	0.823	2.189	2.179	3.798	21710	39480	28820	39280	49110	113000	40430	107500	107000	186500	1	1	1	1	1	1
FALSE	High	[R].LSTNGPLPDK.[L]	2xTMT6plex [N-Term; K10]; 1xDeamidated [N4]		FALSE	0.00501495	0	1	1	42	Q9CQ52	Q9CQ52 [164-173]	0	1500.87	High	High	High	High	High	High	High	High	High	High	0.048	0.09	0.043	0.322	1.329	1.033	2.428	1.531	3.777	4060000	7717000	3669000	27540000	85420000	113500000	88200000	207400000	130800000	322600000	30	32	31	34	34	34
FALSE	High	[R].SAQLGDAVQLACLPPAGEILPNGAPCYISGWGR.[L]	1xTMT6plex [N-Term]; 1xDeamidated [Q9]; 2xCarbamidomethyl [C12; C26]		FALSE	0.0113508	0.00117917	1	2	1	Q9CQ52	Q9CQ52 [131-163]	0	3668.84	High	High	High	High	High	High	High	High	High	High	1.716	2.078	1.166	1.009	1.07	0.555	0.838	0.84	1.172	26020	31510	17680	15300	15170	16220	8415	12710	12730	17780	1	1	1	1	1	1
FALSE	High	[R].LSTNGPLPDKLQQALLPVVDYEHCSR.[W]	2xTMT6plex [N-Term; K10]; 2xDeamidated [Q12; Q13]; 1xCarbamidomethyl [C24]		FALSE	0.0410152	0.00171593	1	1	1	Q9CQ52	Q9CQ52 [164-189]	1	3410.8	High	High	High	High	High	High	High	High	High	High
FALSE	High	[R].LSTNGPLPDK.[L]	2xTMT6plex [N-Term; K10]		FALSE	0.030783	0.00171593	1	1	10	Q9CQ52	Q9CQ52 [164-173]	0	1499.88	High	High	High	High	High	High	High	High	High	High	0.134	0.19	0.121	0.323	1.331	0.944	2.171	1.546	3.415	740600	1051000	668100	1787000	5529000	7359000	5221000	12000000	8546000	18880000	8	8	8	8	8	8
FALSE	High	[RK].KPTVFTR.[V]	2xTMT6plex [N-Term; K1]		TRUE	0.0796379	0.00171593	1	4	6	Q9CQ52	Q9CQ52 [248-254]	0	1306.82	High	High	High	High	High	High	High	High	High	High	0.01	0.064	0.03	0.504	1.386	2.202	3.027	0.764	3.983	338500	4277000	1972000	33570000	66600000	92280000	146600000	201600000	50870000	265300000	3	4	4	4	4	4
High	Master Protein	88042	S14666 *CON* keratin 10, type I, cytoskeletal (clone IIB5) - human (fragment)	TRUE	0	122.631	43.0464	19	115	1	1	453	48.175	5.16	High	High	High	High	High	High	High	High	High	High									Pf00038, Pf04111, Pf08317	2.083	0.515	4.043	2.292	0.494	0.549	0.237	0.533	0.368	97760	24150	189700	107600	46930	23170	25780
Checked	Confidence	Annotated Sequence	Modifications	Modifications in Master Proteins	Contaminant	Qvality PEP	Qvality q-value	# Protein Groups	# Proteins	# PSMs	Master Protein Accessions	Positions in Master Proteins	# Missed Cleavages	Theo. MH+ [Da]	Found in Sample: [S1] F1: 126, Sample	Found in Sample: [S2] F1: 127N, Sample	Found in Sample: [S3] F1: 127C, Sample	Found in Sample: [S4] F1: 128N, Sample	Found in Sample: [S5] F1: 128C, Control	Found in Sample: [S6] F1: 129N, Sample	Found in Sample: [S7] F1: 129C, Sample	Found in Sample: [S8] F1: 130N, Sample	Found in Sample: [S9] F1: 130C, Sample	Found in Sample: [S10] F1: 131, Sample	Abundance Ratio: (F1, 126) / (F1, 128C)	Abundance Ratio: (F1, 127N) / (F1, 128C)	Abundance Ratio: (F1, 127C) / (F1, 128C)	Abundance Ratio: (F1, 128N) / (F1, 128C)	Abundance Ratio: (F1, 129N) / (F1, 128C)	Abundance Ratio: (F1, 129C) / (F1, 128C)	Abundance Ratio: (F1, 130N) / (F1, 128C)	Abundance Ratio: (F1, 130C) / (F1, 128C)	Abundance Ratio: (F1, 131) / (F1, 128C)	Abundance: F1: 126, Sample	Abundance: F1: 127N, Sample	Abundance: F1: 127C, Sample	Abundance: F1: 128N, Sample	Abundance: F1: 128C, Control	Abundance: F1: 129N, Sample	Abundance: F1: 129C, Sample	Abundance: F1: 130N, Sample	Abundance: F1: 130C, Sample	Abundance: F1: 131, Sample	Abundances Count: F1: 126, Sample	Abundances Count: F1: 127N, Sample	Abundances Count: F1: 127C, Sample	Abundances Count: F1: 128N, Sample	Abundances Count: F1: 128C, Control	Abundances Count: F1: 129N, Sample
FALSE	High	[K].SKELTTEIDNNIEQISSYK.[S]	3xTMT6plex [N-Term; K2; K19]; 1xDeamidated [N/Q]		TRUE	0.00149844	0	2	7	5	119581085; 88042	119581085 [344-362]; 88042 [215-233]	1	2900.57	High	High	High	High	High	High	High	High	High	High	1.284	0.356	2.156	1.412	1.018	0.604	1.148	1.073	1.353	53320	14770	89500	58620	41510	42240	25080	47680	44540	56180	1	1	1	1	1	1
FALSE	High	[K].SKELTTEIDNNIEQISSYK.[S]	3xTMT6plex [N-Term; K2; K19]		TRUE	0.00213794	0	2	7	1	119581085; 88042	119581085 [344-362]; 88042 [215-233]	1	2899.59	High	High	High	High	High	High	High	High	High	High	1.385	0.742	2.486	1.74	1.571	0.858	1.4	1.183	1.436	47370	25370	85020	59520	34200	53750	29360	47880	40460	49130	1	1	1	1	1	1
FALSE	High	[R].ALEESNYELEGK.[I]	2xTMT6plex [N-Term; K12]		TRUE	8.52451e-05	0	3	10	13	119581085; 88042; P02535	119581085 [166-177]; 88042 [37-48]; P02535 [164-175]	0	1839.97	High	High	High	High	High	High	High	High	High	High	0.351	0.141	0.608	0.481	0.678	0.66	0.496	1.107	0.417	2134000	858200	3696000	2922000	6081000	4122000	4015000	3017000	6729000	2534000	7	7	7	7	7	7
FALSE	High	[K].ELTTEIDNNIEQISSYK.[S]	2xTMT6plex [N-Term; K17]; 1xDeamidated [Q/N]		TRUE	6.88673e-05	0	2	7	6	119581085; 88042	119581085 [346-362]; 88042 [217-233]	0	2456.28	High	High	High	High	High	High	High	High	High	High	1.848	0.208	5.936	1.487	0.546	0.693	0.365	0.629	0.714	58630	6586	188300	47180	31730	17330	21980	11580	19970	22650	1	1	1	1	1	1
FALSE	High	[K].ELTTEIDNNIEQISSYK.[S]	2xTMT6plex [N-Term; K17]		TRUE	5.44357e-06	0	2	7	6	119581085; 88042	119581085 [346-362]; 88042 [217-233]	0	2455.3	High	High	High	High	High	High	High	High	High	High	1.449	0.446	4.489	1.219	0.612	0.646	0.531	0.732	0.686	291800	89850	904300	245500	201400	123300	130200	106900	147400	138300	4	4	4	4	4	4
FALSE	High	[R].AETECQNTEYQQLLDIK.[I]	2xTMT6plex [N-Term; K17]; 1xDeamidated [Q]; 1xCarbamidomethyl [C5]		TRUE	0.000716984	0	2	6	3	119581085; 88042	119581085 [423-439]; 88042 [294-310]	0	2542.27	High	High	High	High	High	High	High	High	High	High	0.514	0.501	1.431	0.648	0.672	0.763	0.409	1.011	0.496	76600	74670	213100	96500	149000	100100	113700	60900	150700	73870	1	1	1	1	1	1
FALSE	High	[R].AETECQNTEYQQLLDIK.[I]	2xTMT6plex [N-Term; K17]; 1xCarbamidomethyl [C5]		TRUE	5.82296e-06	0	2	6	12	119581085; 88042	119581085 [423-439]; 88042 [294-310]	0	2541.29	High	High	High	High	High	High	High	High	High	High	0.46	0.315	1.564	0.808	0.561	0.843	0.289	1.241	0.426	658900	450600	2241000	1158000	1433000	804000	1207000	413700	1778000	610000	8	8	8	8	8	8
FALSE	High	[R].SQYEQLAEQNR.[K]	1xTMT6plex [N-Term]		TRUE	0.00101922	0	2	6	13	119581085; 88042	119581085 [323-333]; 88042 [194-204]	0	1594.8	High	High	High	High	High	High	High	High	High	High	0.515	0.595	0.642	0.511	0.999	0.958	0.575	1.537	0.739	2091000	2413000	2605000	2072000	4058000	4056000	3889000	2335000	6236000	2998000	8	8	8	8	8	8
FALSE	High	[R].QSVEADINGLR.[R]	1xTMT6plex [N-Term]		TRUE	0.00202127	0	3	16	6	119581085; 88042; P02535	119581085 [246-256]; 88042 [117-127]; P02535 [244-254]	0	1430.78	High	High	High	High	High	High	High	High	High	High	0.452	0.317	0.672	0.624	0.743	0.442	0.533	0.851	0.432	2933000	2057000	4362000	4056000	6495000	4826000	2869000	3461000	5528000	2809000	6	6	6	6	6	6
FALSE	High	[R].QSVEADINGLR.[R]	1xTMT6plex [N-Term]; 1xDeamidated [N8]		TRUE	0.000935172	0	3	16	6	119581085; 88042; P02535	119581085 [246-256]; 88042 [117-127]; P02535 [244-254]	0	1431.76	High	High	High	High	High	High	High	High	High	High	0.731	0.457	0.991	0.604	0.956	0.785	1.277	1.278	0.968	1880000	1176000	2549000	1554000	2573000	2460000	2020000	3285000	3288000	2491000	5	5	5	5	5	5
FALSE	High	[R].YCVQLSQIQAQISALEEQLQQIR.[A]	1xTMT6plex [N-Term]; 1xCarbamidomethyl [C2]		TRUE	1.61883e-06	0	2	5	1	119581085; 88042	119581085 [400-422]; 88042 [271-293]	0	2975.58	High	High	High	High	High	High	High	High	High	High
FALSE	High	[K].TIDDLKNQILNLTTDNANILLQIDNAR.[L]	2xTMT6plex [N-Term; K6]		TRUE	0.000462766	0	2	7	1	119581085; 88042	119581085 [202-228]; 88042 [73-99]	1	3510.95	High	High	High	High	High	High	High	High	High	High
FALSE	High	[K].NQILNLTTDNANILLQIDNAR.[L]	1xTMT6plex [N-Term]		TRUE	5.91461e-07	0	2	7	3	119581085; 88042	119581085 [208-228]; 88042 [79-99]	0	2596.43	High	High	High	High	High	High	High	High	High	High	1.33	1.267	2.72	1.064	1.267	1.29	0.969	1.748	1.238	95690	91170	195700	76560	71950	91130	92810	69700	125800	89090	2	2	2	2	2	2
FALSE	High	[K].NQILNLTTDNANILLQIDNAR.[L]	1xTMT6plex [N-Term]; 1xDeamidated [N10]		TRUE	0.00018156	0	2	7	1	119581085; 88042	119581085 [208-228]; 88042 [79-99]	0	2597.41	High	High	High	High	High	High	High	High	High	High
FALSE	High	[R].VLDELTLTK.[A]	2xTMT6plex [N-Term; K9]		TRUE	0.0102652	0.00117917	2	6	10	119581085; 88042	119581085 [258-266]; 88042 [129-137]	0	1489.92	High	High	High	High	High	High	High	High	High	High	0.47	0.174	1.104	0.491	0.452	0.784	0.347	1.437	0.352	2565000	948300	6028000	2680000	5458000	2468000	4281000	1893000	7842000	1924000	9	9	9	9	9	9
FALSE	High	[K].ADLEMQIESLTEYVAYLKK.[N]	3xTMT6plex [N-Term; K18; K19]		TRUE	0.0867589	0.00171593	1	1	2	88042	88042 [138-156]	1	2931.64	High	High	High	High	High	High	High	High	High	High	2.083	0.515	4.043	2.292	0.494	0.549	0.237	0.533	0.368	97760	24150	189700	107600	46930	23170	25780	11140	25020	17290	1	1	1	1	1	1
FALSE	High	[K].YENEVALR.[Q]	1xTMT6plex [N-Term]		TRUE	0.0503346	0.00171593	2	7	4	119581085; 88042	119581085 [238-245]; 88042 [109-116]	0	1222.66	High	High	High	High	High	High	High	High	High	High	1.327	0.825	2.449	1.316	1.092	1.151	1.021	1.032	0.94	1120000	696500	2067000	1111000	844200	921800	972000	862300	871400	793900	1	1	1	1	1	1
FALSE	High	[R].LKYENEVALR.[Q]	2xTMT6plex [N-Term; K2]		TRUE	0.0651222	0.00171593	2	7	1	119581085; 88042	119581085 [236-245]; 88042 [107-116]	1	1693	High	High	High	High	High	High	High	High	High	High	1.529	0.879	3.326	1.375	1.221	1.349	0.734	1.87	0.738	710800	408700	1546000	639200	464900	567800	627300	341400	869600	343100	1	1	1	1	1	1
FALSE	High	[K-R].VTMQNLNDR.[L]	1xTMT6plex [N-Term]; 1xDeamidated [N7]		TRUE	0.0476543	0.00171593	4	25	1	119581085; 88042; 125080; P02535	119581085 [148-156]; 88042 [19-27]; 125080 [117-125]; P02535 [146-154]	0	1320.68	High	High	High	High	High	High	High	High	High	High	0.617	0.674	0.666	0.583	0.878	0.601	0.689	0.991	0.75	223100	243800	240900	210800	361800	317800	217500	249300	358400	271200	1	1	1	1	1	1
FALSE	High	[K-R].VTMQNLNDR.[L]	1xTMT6plex [N-Term]		TRUE	0.0180635	0.00171593	4	25	5	119581085; 88042; 125080; P02535	119581085 [148-156]; 88042 [19-27]; 125080 [117-125]; P02535 [146-154]	0	1319.69	High	High	High	High	High	High	High	High	High	High	0.368	0.174	0.556	0.397	0.6	0.683	0.553	1.218	0.491	1401000	663700	2115000	1509000	3804000	2281000	2599000	2106000	4634000	1867000	2	2	2	2	2	2
FALSE	High	[K].NHEEEMK.[DEACV]	2xTMT6plex [N-Term; K7]		TRUE	0.0892638	0.00171593	2	18	1	119581085; 88042	119581085 [286-292]; 88042 [157-163]	0	1374.71	High	High	High	High	High	High	High	High	High	High
FALSE	High	[R].LASYLDKVR.[A]	2xTMT6plex [N-Term; K7]		TRUE	0.0746653	0.00171593	3	26	2	119581085; 88042; 125080	119581085 [157-165]; 88042 [28-36]; 125080 [126-134]	1	1522.94	High	High	High	High	High	High	High	High	High	High	0.488	0.848	0.569	0.769	1.484	0.616	1.021	0.689	0.759	187200	325500	218300	295300	383800	569700	236600	391900	264500	291400	1	1	1	1	1	1
FALSE	High	[R].LENEIQTYR.[SG]	1xTMT6plex [N-Term]		TRUE	0.0368722	0.00171593	3	11	2	119581085; 88042; P02535	119581085 [442-450]; 88042 [313-321]; P02535 [440-448]	0	1394.75	High	High	High	High	High	High	High	High	High	High	0.165	0.129	0.562	0.369	0.572	0.622	0.446	1.552	0.857	356600	279600	1216000	798100	2163000	1237000	1345000	965300	3357000	1854000	1	1	1	1	1	1
FALSE	High	[R].LASYLDK.[V]	2xTMT6plex [N-Term; K7]		TRUE	0.165448	0.00332358	4	30	7	119581085; 88042; 125080; 1082558	119581085 [157-163]; 88042 [28-34]; 125080 [126-132]; 1082558 [164-170]	0	1267.77	High	High	High	High	High	High	High	High	High	High	0.895	0.046	0.582	0.374	0.577	0.524	0.467	0.901	0.292	46260000	2385000	30060000	19330000	51690000	29840000	27090000	24130000	46570000	15090000	3	3	3	3	3	3
FALSE	High	[K-R].VTMQNLNDR.[L]	1xTMT6plex [N-Term]; 1xOxidation [M3]		TRUE	0.18195	0.00651022	4	25	1	119581085; 88042; 125080; P02535	119581085 [148-156]; 88042 [19-27]; 125080 [117-125]; P02535 [146-154]	0	1335.69	High	High	High	High	High	High	High	High	High	High	0.43	0.375	0.618	0.541	0.827	0.652	0.669	1.147	0.666	37120	32410	53370	46760	86370	71460	56320	57810	99080	57510	1	1	1	1	1	1
FALSE	High	[K].KNHEEEMKDLR.[N]	3xTMT6plex [N-Term; K1; K8]; 1xOxidation [M7]		TRUE	0.190111	0.00804114	2	6	2	119581085; 88042	119581085 [285-295]; 88042 [156-166]	2	2132.17	High	High	High	High	High	High	High	High	High	High	0.712	0.746	0.582	0.529	0.794	0.596	0.647	0.731	0.583	168100	176100	137300	124800	235900	187400	140700	152600	172400	137500	1	1	1	1	1	1
High	Master Protein	P02662	*CON* Alpha-S1-casein precursor - Bos taurus	TRUE	0	121.802	38.785	8	160	8	1	214	24.513	5.02	High	High	High	High	High	High	High	High	High	High	Phospho [S56; S61; S63; T64; S130]	282208	ENSBTAG00000007695	CSN1S1	6	regulation of biological process;response to stimulus;transport	extracellular;Golgi;organelle lumen	antioxidant activity;catalytic activity;transporter activity	Pf00363	0.458	0.588	0.52	0.494	2.845	0.746	2.786	2.663	4.759	5458000	7012000	6201000	5893000	11920000	33920000	8898000
Checked	Confidence	Annotated Sequence	Modifications	Modifications in Master Proteins	Contaminant	Qvality PEP	Qvality q-value	# Protein Groups	# Proteins	# PSMs	Master Protein Accessions	Positions in Master Proteins	# Missed Cleavages	Theo. MH+ [Da]	Found in Sample: [S1] F1: 126, Sample	Found in Sample: [S2] F1: 127N, Sample	Found in Sample: [S3] F1: 127C, Sample	Found in Sample: [S4] F1: 128N, Sample	Found in Sample: [S5] F1: 128C, Control	Found in Sample: [S6] F1: 129N, Sample	Found in Sample: [S7] F1: 129C, Sample	Found in Sample: [S8] F1: 130N, Sample	Found in Sample: [S9] F1: 130C, Sample	Found in Sample: [S10] F1: 131, Sample	Abundance Ratio: (F1, 126) / (F1, 128C)	Abundance Ratio: (F1, 127N) / (F1, 128C)	Abundance Ratio: (F1, 127C) / (F1, 128C)	Abundance Ratio: (F1, 128N) / (F1, 128C)	Abundance Ratio: (F1, 129N) / (F1, 128C)	Abundance Ratio: (F1, 129C) / (F1, 128C)	Abundance Ratio: (F1, 130N) / (F1, 128C)	Abundance Ratio: (F1, 130C) / (F1, 128C)	Abundance Ratio: (F1, 131) / (F1, 128C)	Abundance: F1: 126, Sample	Abundance: F1: 127N, Sample	Abundance: F1: 127C, Sample	Abundance: F1: 128N, Sample	Abundance: F1: 128C, Control	Abundance: F1: 129N, Sample	Abundance: F1: 129C, Sample	Abundance: F1: 130N, Sample	Abundance: F1: 130C, Sample	Abundance: F1: 131, Sample	Abundances Count: F1: 126, Sample	Abundances Count: F1: 127N, Sample	Abundances Count: F1: 127C, Sample	Abundances Count: F1: 128N, Sample	Abundances Count: F1: 128C, Control	Abundances Count: F1: 129N, Sample
FALSE	High	[K].VNELSKDIGSESTEDQAMEDIK.[Q]	3xTMT6plex [N-Term; K6; K22]; 1xPhospho [S5]	P02662 1xPhospho [S56]	TRUE	0.00103459	0	1	1	6	P02662	P02662 [52-73]	1	3205.58	High	High	High	High	High	High	High	High	High	High	0.091	0.387	0.157	0.474	2.633	0.945	4.646	4.307	10.464	19370	82320	33480	100900	213000	560800	201300	989600	917400	2229000	3	4	4	4	4	4
FALSE	High	[K].QMEAESISSSEEIVPNSVEQK.[H]	2xTMT6plex [N-Term; K21]; 1xDeamidated [N16]		TRUE	0.000178194	0	1	1	1	P02662	P02662 [74-94]	0	2780.39	High	High	High	High	High	High	High	High	High	High
FALSE	High	[K].QMEAESISSSEEIVPNSVEQK.[H]	2xTMT6plex [N-Term; K21]; 1xOxidation [M2]		TRUE	1.06779e-05	0	1	1	3	P02662	P02662 [74-94]	0	2795.4	High	High	High	High	High	High	High	High	High	High	0.434	0.749	0.46	2.587	1.689	0.555	1.93	3.78	5.148	37200	64140	39430	221600	85670	144700	47560	165400	323900	441100	2	2	2	2	2	2
FALSE	High	[K].QMEAESISSSEEIVPNSVEQK.[H]	2xTMT6plex [N-Term; K21]		TRUE	3.55279e-06	0	1	1	3	P02662	P02662 [74-94]	0	2779.41	High	High	High	High	High	High	High	High	High	High	0.223	0.334	0.229	1.379	0.996	0.42	1.027	1.887	2.571	61080	91630	62690	378200	274200	273200	115200	281500	517500	705000	2	2	2	2	2	2
FALSE	High	[K].DIGSESTEDQAMEDIK.[Q]	2xTMT6plex [N-Term; K16]		TRUE	1.90152e-06	0	1	1	25	P02662	P02662 [58-73]	0	2226.08	High	High	High	High	High	High	High	High	High	High	0.696	0.843	0.871	0.535	2.773	0.888	3.726	3.892	6.836	2065000	2503000	2587000	1588000	2968000	8231000	2636000	11060000	11550000	20290000	20	20	20	20	20	20
FALSE	High	[K].DIGSESTEDQAMEDIK.[Q]	2xTMT6plex [N-Term; K16]; 1xOxidation [M12]		TRUE	6.9215e-07	0	1	1	31	P02662	P02662 [58-73]	0	2242.08	High	High	High	High	High	High	High	High	High	High	0.474	0.517	0.345	0.429	2.622	0.836	3.506	3.475	6.61	1544000	1682000	1123000	1397000	3255000	8534000	2720000	11410000	11310000	21510000	23	26	23	26	26	26
FALSE	High	[K].DIGSESTEDQAMEDIK.[Q]	2xTMT6plex [N-Term; K16]; 1xDeamidated [Q10]; 1xOxidation [M12]		TRUE	0.00081122	0	1	1	2	P02662	P02662 [58-73]	0	2243.06	High	High	High	High	High	High	High	High	High	High	0.263	0.782	0.31	0.477	1.621	0.627	2.211	2.04	3.417	35850	106500	42260	64980	136200	220900	85370	301200	278000	465500	1	2	2	2	2	2
FALSE	High	[R].YLGYLEQLLR.[L]	1xTMT6plex [N-Term]		TRUE	0.00443315	0	1	1	3	P02662	P02662 [106-115]	0	1496.87	High	High	High	High	High	High	Not Found	High	High	High	0.404	0.599	0.748	0.816	39.191	0.01	5.795	0.868	1.779	12460	18460	23050	25130	30810	1208000		178500	26760	54820	2	2	2	2	2	2
FALSE	High	[K].DIGSESTEDQAMEDIK.[Q]	2xTMT6plex [N-Term; K16]; 1xDeamidated [Q10]		TRUE	0.000457599	0	1	1	2	P02662	P02662 [58-73]	0	2227.07	High	High	High	High	High	High	High	High	High	High	0.32	0.671	0.405	0.63	2.934	0.849	3.789	3.646	5.673	7317	15330	9250	14400	22860	67070	19410	86640	83350	129700	1	1	1	1	1	1
FALSE	High	[K].EKVNELSKDIGSESTEDQAMEDIK.[Q]	4xTMT6plex [N-Term; K2; K8; K24]; 1xPhospho [S7]	P02662 1xPhospho [S56]	TRUE	0.00938717	0.00117917	1	1	2	P02662	P02662 [50-73]	2	3691.88	High	High	High	High	High	High	High	High	High	High	0.339	0.524	0.322	0.582	2.737	1.037	7.277	4.896	11.209	14370	22260	13680	24730	42460	116200	44040	308900	207900	475900	1	1	1	1	1	1
FALSE	High	[K].EKVNELSKDIGSESTEDQAMEDIK.[Q]	4xTMT6plex [N-Term; K2; K8; K24]; 2xPhospho [S7; S12]	P02662 2xPhospho [S56; S61]	TRUE	0.0112666	0.00117917	1	1	1	P02662	P02662 [50-73]	2	3771.85	High	High	High	High	High	High	High	High	High	High
FALSE	High	[K].EKVNELSKDIGSESTEDQAMEDIK.[Q]	4xTMT6plex [N-Term; K2; K8; K24]; 1xPhospho [S7]; 1xOxidation [M20]	P02662 1xPhospho [S56]	TRUE	0.0120922	0.00117917	1	1	1	P02662	P02662 [50-73]	2	3707.87	High	High	High	High	High	High	High	High	High	High
FALSE	High	[R].FFVAPFPEVFGK.[E]	2xTMT6plex [N-Term; K12]		TRUE	0.0469633	0.00171593	1	1	4	P02662	P02662 [38-49]	0	1843.06	High	High	High	High	High	High	High	High	High	High	0.052	0.058	0.01	0.264	7.587	1.401	7.926	0.719	4.548	17450	19510		89500	338800	2570000	474700	2685000	243600	1541000	1	1		1	1	1
FALSE	High	[K].DIGSESTEDQAMEDIK.[Q]	2xTMT6plex [N-Term; K16]; 1xPhospho [T/S]; 1xOxidation [M12]	P02662 1xPhospho [S/T]	TRUE	0.0328957	0.00171593	1	1	21	P02662	P02662 [58-73]	0	2322.05	High	High	High	High	High	High	High	High	High	High	0.321	0.447	0.613	0.346	2.277	0.476	0.773	0.912	0.905	446700	621500	852200	480300	1390000	3163000	661000	1074000	1267000	1258000	9	9	9	9	9	9
FALSE	High	[K].DIGSESTEDQAMEDIK.[Q]	2xTMT6plex [N-Term; K16]; 1xPhospho [S/T]	P02662 1xPhospho [S/T]	TRUE	0.0197454	0.00171593	1	1	20	P02662	P02662 [58-73]	0	2306.05	High	High	High	High	High	High	High	High	High	High	0.322	0.506	0.313	0.433	2.517	0.593	0.94	1.194	0.861	484700	761000	469900	650800	1504000	3785000	890900	1413000	1795000	1294000	9	9	9	9	9	9
FALSE	High	[K].VNELSKDIGSESTEDQAMEDIK.[Q]	3xTMT6plex [N-Term; K6; K22]; 1xDeamidated [Q16]; 2xPhospho [S5; S10]; 1xOxidation [M18]	P02662 2xPhospho [S56; S61]	TRUE	0.124278	0.00171593	1	1	1	P02662	P02662 [52-73]	1	3302.52	High	High	High	High	High	High	High	High	High	High
FALSE	High	[K].VNELSKDIGSESTEDQAMEDIK.[Q]	3xTMT6plex [N-Term; K6; K22]; 2xPhospho [S10; S]; 1xOxidation [M18]	P02662 2xPhospho [S61; S]	TRUE	0.0975391	0.00171593	1	1	4	P02662	P02662 [52-73]	1	3301.54	High	High	High	High	High	High	High	High	High	High	0.181	0.394	0.207	0.564	3.686	0.548	1.317	1.247	1.689	11390	24820	13030	35530	63020	232300	34560	82990	78590	106500	1	1	1	1	1	1
FALSE	High	[K].VNELSKDIGSESTEDQAMEDIK.[Q]	3xTMT6plex [N-Term; K6; K22]; 2xPhospho [S5; S10]	P02662 2xPhospho [S56; S61]	TRUE	0.0371443	0.00171593	1	1	1	P02662	P02662 [52-73]	1	3285.55	High	High	High	High	High	High	High	High	High	High	0.049	0.148	0.14	0.293	3.853	0.457	1.389	1.267	1.737	5038	15320	14510	30460	103800	400000	47440	144200	131500	180400	1	1	1	1	1	1
FALSE	High	[K].VNELSKDIGSESTEDQAMEDIK.[Q]	3xTMT6plex [N-Term; K6; K22]; 1xPhospho [S5]; 1xOxidation [M18]	P02662 1xPhospho [S56]	TRUE	0.0198923	0.00171593	1	1	10	P02662	P02662 [52-73]	1	3221.57	High	High	High	High	High	High	High	High	High	High	0.567	0.781	0.801	0.511	2.313	0.465	2.636	2.322	6.216	378000	520200	533400	340200	666400	1541000	310100	1757000	1547000	4142000	8	8	8	8	8	8
FALSE	High	[K].VNELSKDIGSESTEDQAMEDIK.[Q]	3xTMT6plex [N-Term; K6; K22]; 1xDeamidated [Q16]; 1xPhospho [S5]	P02662 1xPhospho [S56]	TRUE	0.0333842	0.00171593	1	1	1	P02662	P02662 [52-73]	1	3206.56	High	High	High	High	High	High	High	High	High	High	0.324	0.334	0.277	0.449	1.71	0.845	2.401	3.483	5.853	25590	26370	21900	35460	79000	135100	66780	189600	275100	462400	1	1	1	1	1	1
FALSE	High	[K].VPQLEIVPNSAEER.[L]	1xTMT6plex [N-Term]; 1xPhospho [S10]	P02662 1xPhospho [S130]	TRUE	0.0434916	0.00171593	1	1	6	P02662	P02662 [121-134]	0	1889.96	High	High	High	High	High	High	High	High	High	High	0.55	0.869	0.684	0.847	3.61	1.064	1.487	1.893	1.709	95490	151000	118800	147200	173800	627300	184900	258400	328900	296900	3	3	3	3	3	3
FALSE	High	[K].YKVPQLEIVPNSAEER.[L]	2xTMT6plex [N-Term; K2]; 1xPhospho [S12]	P02662 1xPhospho [S130]	TRUE	0.049606	0.00171593	1	1	3	P02662	P02662 [119-134]	1	2410.28	High	High	High	High	High	High	High	High	High	High	0.412	0.691	0.59	0.598	3.922	0.68	1.142	1.524	1.456	77880	130600	111500	113000	189000	741400	128600	215800	288100	275300	2	2	2	2	2	2
FALSE	High	[K].VNELSKDIGSESTEDQAMEDIK.[Q]	3xTMT6plex [N-Term; K6; K22]; 1xDeamidated [Q16]; 2xPhospho [S5; S10]	P02662 2xPhospho [S56; S61]	TRUE	0.0355406	0.00171593	1	1	5	P02662	P02662 [52-73]	1	3286.53	High	High	High	High	High	High	High	High	High	High	0.302	0.386	0.342	0.4	3.619	0.597	1.417	1.258	1.817	95160	121600	107700	126000	314700	1139000	187900	446100	395800	572000	4	4	4	4	4	4
FALSE	High	[K].EKVNELSKDIGSESTEDQAMEDIK.[Q]	4xTMT6plex [N-Term; K2; K8; K24]; 1xDeamidated [Q/N]; 2xPhospho [S7; S12]	P02662 2xPhospho [S56; S61]	TRUE	0.101763	0.00171593	1	1	2	P02662	P02662 [50-73]	2	3772.83	High	High	High	High	High	High	High	High	High	High	0.248	0.402	0.201	0.336	3.163	0.464	1.265	1.29	1.571	10730	17400	8673	14550	43260	136800	20060	54730	55800	67960	1	1	1	1	1	1
FALSE	High	[K].EKVNELSKDIGSESTEDQAMEDIK.[Q]	4xTMT6plex [N-Term; K2; K8; K24]; 1xDeamidated [Q18]; 1xPhospho [S7]; 1xOxidation [M20]	P02662 1xPhospho [S56]	TRUE	0.0712594	0.00171593	1	1	1	P02662	P02662 [50-73]	2	3708.86	High	High	High	High	High	High	High	High	High	High	0.45	0.574	0.53	0.517	3.005	0.754	3.985	4.21	8.259	13280	16950	15630	15260	29500	88650	22230	117600	124200	243700	1	1	1	1	1	1
FALSE	High	[K].EKVNELSKDIGSESTEDQAMEDIK.[Q]	4xTMT6plex [N-Term; K2; K8; K24]; 1xDeamidated [Q18]; 1xPhospho [S7]	P02662 1xPhospho [S56]	TRUE	0.0630392	0.00171593	1	1	1	P02662	P02662 [50-73]	2	3692.86	High	High	High	High	High	High	High	High	High	High
High	Master Protein	P07146	Anionic trypsin-2 OS=Mus musculus GN=Prss2 PE=2 SV=1	FALSE	0	108.821	36.5854	4	120	4	1	246	26.187	4.63	High	High	High	High	High	High	High	High	High	High		22072	ENSMUSG00000057163	Prss2	6	metabolic process;response to stimulus	extracellular	catalytic activity;metal ion binding	Pf00089	0.792	1.187	0.73	0.911	1.036	0.917	0.704	3.315	2.292	5076000	7601000	4679000	5834000	6406000	6635000	5874000
Checked	Confidence	Annotated Sequence	Modifications	Modifications in Master Proteins	Contaminant	Qvality PEP	Qvality q-value	# Protein Groups	# Proteins	# PSMs	Master Protein Accessions	Positions in Master Proteins	# Missed Cleavages	Theo. MH+ [Da]	Found in Sample: [S1] F1: 126, Sample	Found in Sample: [S2] F1: 127N, Sample	Found in Sample: [S3] F1: 127C, Sample	Found in Sample: [S4] F1: 128N, Sample	Found in Sample: [S5] F1: 128C, Control	Found in Sample: [S6] F1: 129N, Sample	Found in Sample: [S7] F1: 129C, Sample	Found in Sample: [S8] F1: 130N, Sample	Found in Sample: [S9] F1: 130C, Sample	Found in Sample: [S10] F1: 131, Sample	Abundance Ratio: (F1, 126) / (F1, 128C)	Abundance Ratio: (F1, 127N) / (F1, 128C)	Abundance Ratio: (F1, 127C) / (F1, 128C)	Abundance Ratio: (F1, 128N) / (F1, 128C)	Abundance Ratio: (F1, 129N) / (F1, 128C)	Abundance Ratio: (F1, 129C) / (F1, 128C)	Abundance Ratio: (F1, 130N) / (F1, 128C)	Abundance Ratio: (F1, 130C) / (F1, 128C)	Abundance Ratio: (F1, 131) / (F1, 128C)	Abundance: F1: 126, Sample	Abundance: F1: 127N, Sample	Abundance: F1: 127C, Sample	Abundance: F1: 128N, Sample	Abundance: F1: 128C, Control	Abundance: F1: 129N, Sample	Abundance: F1: 129C, Sample	Abundance: F1: 130N, Sample	Abundance: F1: 130C, Sample	Abundance: F1: 131, Sample	Abundances Count: F1: 126, Sample	Abundances Count: F1: 127N, Sample	Abundances Count: F1: 127C, Sample	Abundances Count: F1: 128N, Sample	Abundances Count: F1: 128C, Control	Abundances Count: F1: 129N, Sample
FALSE	High	[R].LGEHNINVLEGNEQFVDSAK.[I]	2xTMT6plex [N-Term; K20]; 2xDeamidated [N7; N12]		FALSE	4.56249e-05	0	1	1	1	P07146	P07146 [73-92]	0	2673.38	High	High	High	High	High	High	High	High	High	High
FALSE	High	[R].LGEHNINVLEGNEQFVDSAK.[I]	2xTMT6plex [N-Term; K20]; 1xDeamidated [N7]		FALSE	5.25985e-05	0	1	1	2	P07146	P07146 [73-92]	0	2672.39	High	High	High	High	High	High	High	High	High	High
FALSE	High	[R].LGEHNINVLEGNEQFVDSAK.[I]	2xTMT6plex [N-Term; K20]		FALSE	2.95936e-07	0	1	1	24	P07146	P07146 [73-92]	0	2671.41	High	High	High	High	High	High	High	High	High	High
FALSE	High	[K].DSCQGDSGGPVVCNGELQGIVSWGYGCAQPDAPGVYTK.[V]	2xTMT6plex [N-Term; K38]; 3xCarbamidomethyl [C3; C13; C27]		FALSE	4.36491e-06	0	1	1	7	P07146	P07146 [194-231]	0	4444.07	High	High	High	High	High	High	High	High	High	High	0.248	0.232	0.348	0.712	0.824	0.476	0.559	2.777	2.333	94110	87950	132000	270200	379300	312500	180500	211900	1053000	884700	6	6	6	6	6	6
FALSE	High	[K].DSCQGDSGGPVVCNGELQGIVSWGYGCAQPDAPGVYTK.[V]	2xTMT6plex [N-Term; K38]; 1xDeamidated [Q/N]; 3xCarbamidomethyl [C3; C13; C27]		FALSE	3.46091e-06	0	1	1	19	P07146	P07146 [194-231]	0	4445.05	High	High	High	High	High	High	High	High	High	High	0.373	0.486	0.466	0.738	1.114	0.556	0.821	2.497	2.375	53820	70190	67340	106600	144400	161000	80280	118600	360600	343000	5	5	5	5	5	5
FALSE	High	[K].DSCQGDSGGPVVCNGELQGIVSWGYGCAQPDAPGVYTK.[V]	2xTMT6plex [N-Term; K38]; 2xDeamidated [Q18; Q29]; 3xCarbamidomethyl [C3; C13; C27]		FALSE	2.74237e-05	0	1	1	11	P07146	P07146 [194-231]	0	4446.04	High	High	High	High	High	High	High	High	High	High	0.319	0.41	0.416	0.673	1.037	0.579	0.708	2.601	2.309	44440	57150	57900	93820	139300	144600	80730	98690	362500	321800	7	7	7	7	7	7
FALSE	High	[R].HPNYNSWTLDNDIMLIK.[L]	2xTMT6plex [N-Term; K17]		FALSE	1.38763e-05	0	1	1	14	P07146	P07146 [96-112]	0	2532.33	High	High	High	High	High	High	High	High	High	High	0.936	1.454	0.87	0.884	0.917	0.695	0.676	3.654	2.782	2602000	4040000	2417000	2456000	2779000	2548000	1931000	1877000	10160000	7730000	10	10	10	10	10	10
FALSE	High	[R].HPNYNSWTLDNDIMLIK.[L]	2xTMT6plex [N-Term; K17]; 1xDeamidated [N]		FALSE	3.97243e-05	0	1	1	6	P07146	P07146 [96-112]	0	2533.32	High	High	High	High	High	High	High	High	High	High	1.013	1.623	0.678	0.893	1.006	0.883	0.87	3.45	2.457	173300	277800	116000	152800	171200	172200	151000	148900	590400	420500	3	3	3	3	3	3
FALSE	High	[R].HPNYNSWTLDNDIMLIK.[L]	2xTMT6plex [N-Term; K17]; 2xDeamidated [N5; N11]		FALSE	0.00286232	0	1	1	2	P07146	P07146 [96-112]	0	2534.3	High	High	High	High	High	High	High	High	High	High	0.777	1.433	0.891	0.97	1.42	0.782	1.177	2.248	1.853	49770	91770	57060	62150	64050	90930	50090	75370	144000	118700	2	2	2	2	2	2
FALSE	High	[R].HPNYNSWTLDNDIMLIK.[L]	2xTMT6plex [N-Term; K17]; 1xOxidation [M14]		FALSE	4.86538e-06	0	1	1	14	P07146	P07146 [96-112]	0	2548.33	High	High	High	High	High	High	High	High	High	High	0.567	0.892	0.559	0.941	1.165	1.282	0.708	3.255	1.797	1412000	2220000	1393000	2344000	2490000	2901000	3192000	1762000	8103000	4473000	11	11	11	11	11	11
FALSE	High	[R].HPNYNSWTLDNDIMLIK.[L]	2xTMT6plex [N-Term; K17]; 1xDeamidated [N]; 1xOxidation [M14]		FALSE	0.00658658	0	1	1	4	P07146	P07146 [96-112]	0	2549.31	High	High	High	High	High	High	High	High	High	High	1.189	1.36	0.921	0.763	0.982	0.946	0.751	2.806	1.904	85080	97310	65890	54630	71560	70260	67730	53740	200800	136300	1	1	1	1	1	1
FALSE	High	[K].VCNYVDWIQNTIADN.[-]	1xTMT6plex [N-Term]; 1xCarbamidomethyl [C2]		FALSE	0.00355568	0	1	1	14	P07146	P07146 [232-246]	0	2053.99	High	High	High	High	High	High	High	High	High	High	3.454	4.031	2.302	1.8	1.35	0.822	0.948	1.532	1.47	535500	624900	356800	279000	155000	209200	127500	146900	237500	227900	11	11	11	11	11	11
FALSE	High	[K].VCNYVDWIQNTIADN.[-]	1xTMT6plex [N-Term]; 1xDeamidated [N/Q]; 1xCarbamidomethyl [C2]		FALSE	0.057167	0.00171593	1	1	2	P07146	P07146 [232-246]	0	2054.97	High	High	High	High	High	High	High	High	High	High	2.156	2.753	1.303	1.21	2.13	1.078	1.194	2.492	1.865	26350	33650	15930	14790	12220	26030	13180	14590	30470	22800	1	1	1	1	1	1
High	Master Protein	Q8K0C5	Zymogen granule membrane protein 16 OS=Mus musculus GN=Zg16 PE=2 SV=1	FALSE	0	103.907	70.0599	7	126	7	1	167	18.198	9.23	High	High	High	High	High	High	High	High	High	High		69036	ENSMUSG00000049350	Zg16	7	transport	extracellular;Golgi;membrane;organelle lumen		Pf01419	0.991	1.917	0.841	1.485	1.309	1.479	1.148	1.702	1.511	22670000	43860000	19240000	33980000	22890000	29950000	33840000
Checked	Confidence	Annotated Sequence	Modifications	Modifications in Master Proteins	Contaminant	Qvality PEP	Qvality q-value	# Protein Groups	# Proteins	# PSMs	Master Protein Accessions	Positions in Master Proteins	# Missed Cleavages	Theo. MH+ [Da]	Found in Sample: [S1] F1: 126, Sample	Found in Sample: [S2] F1: 127N, Sample	Found in Sample: [S3] F1: 127C, Sample	Found in Sample: [S4] F1: 128N, Sample	Found in Sample: [S5] F1: 128C, Control	Found in Sample: [S6] F1: 129N, Sample	Found in Sample: [S7] F1: 129C, Sample	Found in Sample: [S8] F1: 130N, Sample	Found in Sample: [S9] F1: 130C, Sample	Found in Sample: [S10] F1: 131, Sample	Abundance Ratio: (F1, 126) / (F1, 128C)	Abundance Ratio: (F1, 127N) / (F1, 128C)	Abundance Ratio: (F1, 127C) / (F1, 128C)	Abundance Ratio: (F1, 128N) / (F1, 128C)	Abundance Ratio: (F1, 129N) / (F1, 128C)	Abundance Ratio: (F1, 129C) / (F1, 128C)	Abundance Ratio: (F1, 130N) / (F1, 128C)	Abundance Ratio: (F1, 130C) / (F1, 128C)	Abundance Ratio: (F1, 131) / (F1, 128C)	Abundance: F1: 126, Sample	Abundance: F1: 127N, Sample	Abundance: F1: 127C, Sample	Abundance: F1: 128N, Sample	Abundance: F1: 128C, Control	Abundance: F1: 129N, Sample	Abundance: F1: 129C, Sample	Abundance: F1: 130N, Sample	Abundance: F1: 130C, Sample	Abundance: F1: 131, Sample	Abundances Count: F1: 126, Sample	Abundances Count: F1: 127N, Sample	Abundances Count: F1: 127C, Sample	Abundances Count: F1: 128N, Sample	Abundances Count: F1: 128C, Control	Abundances Count: F1: 129N, Sample
FALSE	High	[K].ASGTSFNAVPLHPNTVLR.[F]	1xTMT6plex [N-Term]		FALSE	1.34253e-06	0	1	1	19	Q8K0C5	Q8K0C5 [123-140]	0	2110.16	High	High	High	High	High	High	High	High	High	High	0.935	1.481	0.874	1.408	1.253	1.316	0.963	1.73	1.264	2200000	3483000	2056000	3312000	2352000	2947000	3097000	2265000	4069000	2974000	11	11	11	11	11	11
FALSE	High	[K].ASGTSFNAVPLHPNTVLR.[F]	1xTMT6plex [N-Term]; 1xDeamidated [N]		FALSE	3.84084e-05	0	1	1	9	Q8K0C5	Q8K0C5 [123-140]	0	2111.14	High	High	High	High	High	High	High	High	High	High	0.862	1.518	0.943	1.19	1.326	0.998	1.088	1.468	1.353	912200	1607000	998500	1260000	1059000	1404000	1057000	1152000	1554000	1433000	7	7	7	7	7	7
FALSE	High	[K].ASGTSFNAVPLHPNTVLR.[F]	1xTMT6plex [N-Term]; 2xDeamidated [N7; N14]		FALSE	0.008117	0	1	1	1	Q8K0C5	Q8K0C5 [123-140]	0	2112.13	High	High	High	High	High	High	High	High	High	High	0.646	0.878	0.664	0.757	1.218	0.672	1.066	1.134	1.186	80390	109200	82600	94200	124400	151500	83590	132600	141100	147500	1	1	1	1	1	1
FALSE	High	[R].FSHSGNQLDGPITAFR.[I]	1xTMT6plex [N-Term]		FALSE	2.95554e-05	0	1	1	12	Q8K0C5	Q8K0C5 [38-53]	0	1976.02	High	High	High	High	High	High	High	High	High	High	0.664	1.442	0.652	0.943	1.009	1.47	0.971	2.089	1.453	1980000	4298000	1943000	2810000	2980000	3007000	4381000	2893000	6223000	4330000	8	8	8	8	8	8
FALSE	High	[R].SGSAIDSISLHWDTYPSHCNTC.[-]	1xTMT6plex [N-Term]; 2xCarbamidomethyl [C19; C22]		FALSE	6.5639e-06	0	1	1	3	Q8K0C5	Q8K0C5 [146-167]	0	2737.22	High	High	High	High	High	High	High	High	High	High	4.717	4.953	1.627	1.284	1.379	0.664	0.985	1.595	1.556	243400	255600	83950	66260	51590	71130	34270	50820	82310	80250	1	1	1	1	1	1
FALSE	High	[R].TSSYSGEYGGK.[G]	2xTMT6plex [N-Term; K11]		FALSE	0.00050815	0	1	1	17	Q8K0C5	Q8K0C5 [23-33]	0	1593.82	High	High	High	High	High	High	High	High	High	High	0.629	1.259	0.457	1.005	1.589	1.32	1.579	1.501	1.659	4957000	9917000	3602000	7913000	7876000	12510000	10400000	12430000	11820000	13070000	11	11	11	11	11	11
FALSE	High	[R].YGTVWSDYVGGTQGDLEEIFLHPGESVIQVSGK.[Y]	2xTMT6plex [N-Term; K33]; 1xDeamidated [Q13]		FALSE	1.1566e-07	0	1	1	2	Q8K0C5	Q8K0C5 [68-100]	0	4027.04	High	High	High	High	High	High	High	High	High	High	5.725	12.462	5.46	8.806	1.382	3.221	0.319	1.985	1.308	128800	280300	122800	198100	22490	31080	72450	7179	44660	29410	2	2	2	2	2	2
FALSE	High	[R].YGTVWSDYVGGTQGDLEEIFLHPGESVIQVSGK.[Y]	2xTMT6plex [N-Term; K33]		FALSE	9.92692e-09	0	1	1	21	Q8K0C5	Q8K0C5 [68-100]	0	4026.05	High	High	High	High	High	High	High	High	High	High	5.223	11.778	4.957	8.574	1.38	2.966	0.581	2.225	1.472	1361000	3069000	1291000	2234000	260500	359500	772700	151400	579700	383400	18	18	18	18	17	18
FALSE	High	[K].QMIFVTDK.[G]	2xTMT6plex [N-Term; K8]; 1xOxidation [M2]		FALSE	0.0543331	0.00171593	1	1	13	Q8K0C5	Q8K0C5 [107-114]	0	1455.83	High	High	High	High	High	High	High	High	High	High	1.774	3.638	1.941	2.807	1.117	2.34	0.918	2.226	1.407	3297000	6759000	3608000	5217000	1858000	2076000	4348000	1707000	4136000	2614000	7	7	7	7	7	7
FALSE	High	[K].QMIFVTDK.[G]	2xTMT6plex [N-Term; K8]		FALSE	0.0434916	0.00171593	1	1	16	Q8K0C5	Q8K0C5 [107-114]	0	1439.83	High	High	High	High	High	High	High	High	High	High	2.046	3.929	1.477	3.151	1.384	2.539	1.077	2.332	2.187	6170000	11840000	4454000	9500000	3015000	4173000	7655000	3247000	7031000	6594000	7	7	7	7	7	7
FALSE	High	[R].FSHSGNQLDGPITAFR.[I]	1xTMT6plex [N-Term]; 1xDeamidated [N/Q]		FALSE	0.0438112	0.00171593	1	1	2	Q8K0C5	Q8K0C5 [38-53]	0	1977	High	High	High	High	High	High	High	High	High	High
FALSE	High	[R].YYIVGLQVR.[Y]	1xTMT6plex [N-Term]		FALSE	0.0350213	0.00171593	1	1	11	Q8K0C5	Q8K0C5 [59-67]	0	1339.79	High	High	High	High	High	High	High	High	High	High	0.408	0.682	0.304	0.419	0.98	0.591	0.676	0.994	0.887	1340000	2240000	998200	1378000	3286000	3222000	1943000	2223000	3266000	2916000	8	8	8	8	8	8
High	Master Protein	P22599	Alpha-1-antitrypsin 1-2 OS=Mus musculus GN=Serpina1b PE=1 SV=2	FALSE	0	94.7516	23.4867	10	124	4	1	413	45.946	5.54	High	High	High	High	High	High	High	High	High	High		20701	ENSMUSG00000071178	Serpina1b	12	defense response;metabolic process;regulation of biological process;response to stimulus	endoplasmic reticulum;extracellular;Golgi	enzyme regulator activity;protein binding	Pf00079	0.384	0.624	0.358	1.361	1.506	1.509	1.764	2.172	2.107	1541000	2509000	1437000	5471000	4019000	6052000	6062000
Checked	Confidence	Annotated Sequence	Modifications	Modifications in Master Proteins	Contaminant	Qvality PEP	Qvality q-value	# Protein Groups	# Proteins	# PSMs	Master Protein Accessions	Positions in Master Proteins	# Missed Cleavages	Theo. MH+ [Da]	Found in Sample: [S1] F1: 126, Sample	Found in Sample: [S2] F1: 127N, Sample	Found in Sample: [S3] F1: 127C, Sample	Found in Sample: [S4] F1: 128N, Sample	Found in Sample: [S5] F1: 128C, Control	Found in Sample: [S6] F1: 129N, Sample	Found in Sample: [S7] F1: 129C, Sample	Found in Sample: [S8] F1: 130N, Sample	Found in Sample: [S9] F1: 130C, Sample	Found in Sample: [S10] F1: 131, Sample	Abundance Ratio: (F1, 126) / (F1, 128C)	Abundance Ratio: (F1, 127N) / (F1, 128C)	Abundance Ratio: (F1, 127C) / (F1, 128C)	Abundance Ratio: (F1, 128N) / (F1, 128C)	Abundance Ratio: (F1, 129N) / (F1, 128C)	Abundance Ratio: (F1, 129C) / (F1, 128C)	Abundance Ratio: (F1, 130N) / (F1, 128C)	Abundance Ratio: (F1, 130C) / (F1, 128C)	Abundance Ratio: (F1, 131) / (F1, 128C)	Abundance: F1: 126, Sample	Abundance: F1: 127N, Sample	Abundance: F1: 127C, Sample	Abundance: F1: 128N, Sample	Abundance: F1: 128C, Control	Abundance: F1: 129N, Sample	Abundance: F1: 129C, Sample	Abundance: F1: 130N, Sample	Abundance: F1: 130C, Sample	Abundance: F1: 131, Sample	Abundances Count: F1: 126, Sample	Abundances Count: F1: 127N, Sample	Abundances Count: F1: 127C, Sample	Abundances Count: F1: 128N, Sample	Abundances Count: F1: 128C, Control	Abundances Count: F1: 129N, Sample
FALSE	High	[K].NHYQAEVFSVNFAESEEAKK.[V]	3xTMT6plex [N-Term; K19; K20]; 1xDeamidated [N11]		FALSE	2.51778e-06	0	3	5	4	P07758; P22599; Q00898	P07758 [154-173]; P22599 [154-173]; Q00898 [154-173]	1	3015.57	High	High	High	High	High	High	High	High	High	High	0.368	0.81	0.496	3.357	1.278	3.516	1.073	2.711	1.684	52010	114500	70200	474600	141400	180600	497200	151700	383300	238100	2	2	2	2	2	2
FALSE	High	[K].NHYQAEVFSVNFAESEEAK.[K]	2xTMT6plex [N-Term; K19]		FALSE	6.73815e-06	0	3	5	8	P07758; P22599; Q00898	P07758 [154-172]; P22599 [154-172]; Q00898 [154-172]	0	2657.32	High	High	High	High	High	High	High	High	High	High	0.271	0.453	0.306	2.028	0.897	1.838	1.378	1.832	1.092	276700	463700	312800	2074000	1023000	916800	1880000	1409000	1873000	1117000	5	5	5	5	5	5
FALSE	High	[K].NHYQAEVFSVNFAESEEAK.[K]	2xTMT6plex [N-Term; K19]; 1xDeamidated [N11]		FALSE	0.000610418	0	3	5	3	P07758; P22599; Q00898	P07758 [154-172]; P22599 [154-172]; Q00898 [154-172]	0	2658.31	High	High	High	High	High	High	High	High	High	High
FALSE	High	[K].NHYQAEVFSVNFAESEEAKK.[V]	3xTMT6plex [N-Term; K19; K20]		FALSE	1.45325e-07	0	3	5	7	P07758; P22599; Q00898	P07758 [154-173]; P22599 [154-173]; Q00898 [154-173]	1	3014.58	High	High	High	High	High	High	High	High	High	High	0.254	0.579	0.63	6.127	1.718	5.86	1.374	4.908	1.869	107500	245400	266700	2596000	423700	727800	2483000	582200	2079000	791900	4	4	4	4	4	4
FALSE	High	[R].LSISGDYNLK.[T]	2xTMT6plex [N-Term; K10]		FALSE	0.00202885	0	1	1	8	P22599	P22599 [309-318]	0	1567.91	High	High	High	High	High	High	High	High	High	High	0.314	0.447	0.363	0.926	1.504	1.399	1.976	2.018	2.561	683900	971600	790500	2013000	2175000	3272000	3042000	4297000	4389000	5570000	6	6	6	6	6	6
FALSE	High	[K].KPFDPENTEEAEFHVDK.[S]	3xTMT6plex [N-Term; K1; K17]		FALSE	7.05225e-07	0	1	1	19	P22599	P22599 [214-230]	0	2719.42	High	High	High	High	High	High	High	High	High	High	0.455	0.837	0.311	1.516	1.489	1.282	1.482	2.219	1.501	686700	1262000	468600	2286000	1508000	2246000	1933000	2235000	3346000	2263000	9	9	9	9	9	9
FALSE	High	[K].ELDQDTVFALANYILFK.[G]	2xTMT6plex [N-Term; K17]		FALSE	1.09613e-05	0	1	1	4	P22599	P22599 [193-209]	0	2458.36	High	High	High	High	High	High	High	High	High	High	0.714	2.042	1.072	12.809	1.735	3.428	1.724	3.337	2.248	37410	107000	56160	671100	52400	90890	179600	90310	174800	117800	2	2	2	2	2	2
FALSE	High	[K].KVINDFVEK.[G]	3xTMT6plex [N-Term; K1; K9]; 1xDeamidated [N4]		FALSE	0.000772702	0	3	5	12	P07758; P22599; Q00898	P07758 [173-181]; P22599 [173-181]; Q00898 [173-181]	1	1780.08	High	High	High	High	High	High	High	High	High	High	0.213	0.296	0.296	0.991	1.394	1.752	1.692	1.217	1.091	709300	984000	985200	3298000	3330000	4642000	5832000	5635000	4053000	3631000	3	3	3	3	3	3
FALSE	High	[K].KVINDFVEK.[G]	3xTMT6plex [N-Term; K1; K9]		FALSE	0.00087426	0	3	5	17	P07758; P22599; Q00898	P07758 [173-181]; P22599 [173-181]; Q00898 [173-181]	1	1779.1	High	High	High	High	High	High	High	High	High	High	0.089	0.189	0.083	1.261	1.483	2.17	1.984	1.723	1.24	2861000	6078000	2669000	40430000	32080000	47580000	69610000	63630000	55260000	39770000	11	11	11	11	11	11
FALSE	High	[R].LVQIHIPR.[L]	1xTMT6plex [N-Term]		FALSE	0.0151146	0.00117917	1	1	4	P22599	P22599 [301-308]	0	1204.77	High	High	High	High	High	High	High	High	High	High	0.47	0.591	0.429	1.762	1.563	3.2	1.642	2.884	1.826	133300	167700	121800	499900	283700	443400	907800	465900	818200	518000	3	3	3	3	3	3
FALSE	High	[K].MQHLEQTLNK.[E]	2xTMT6plex [N-Term; K10]		FALSE	0.030332	0.00171593	2	3	1	P22599; Q00898	P22599 [278-287]; Q00898 [278-287]	0	1699.96	High	High	High	High	High	High	High	High	High	High
FALSE	High	[K].VINDFVEK.[G]	2xTMT6plex [N-Term; K8]; 1xDeamidated [N3]		FALSE	0.0402699	0.00171593	3	5	10	P07758; P22599; Q00898	P07758 [174-181]; P22599 [174-181]; Q00898 [174-181]	0	1422.82	High	High	High	High	High	High	High	High	High	High	0.25	0.443	0.316	0.726	1.701	1.422	2.345	1.553	1.455	1045000	1855000	1322000	3040000	4189000	7127000	5957000	9823000	6505000	6097000	8	8	8	8	8	8
FALSE	High	[K].VINDFVEK.[G]	2xTMT6plex [N-Term; K8]		FALSE	0.0306696	0.00171593	3	5	21	P07758; P22599; Q00898	P07758 [174-181]; P22599 [174-181]; Q00898 [174-181]	0	1421.84	High	High	High	High	High	High	High	High	High	High	0.156	0.231	0.141	0.708	1.733	1.67	2.36	1.711	1.426	2033000	3014000	1835000	9241000	13050000	22620000	21800000	30810000	22340000	18610000	12	12	12	12	12	12
FALSE	High	[K].VVDPTHK.[-]	2xTMT6plex [N-Term; K7]		FALSE	0.18195	0.00651022	3	4	6	P07758; P22599; Q00898	P07758 [407-413]; P22599 [407-413]; Q00898 [407-413]	0	1253.76	High	High	High	High	High	High	High	High	High	High	0.222	0.45	0.137	0.838	1.033	1.122	2.012	2.016	1.544	645300	1309000	398700	2440000	2910000	3006000	3265000	5855000	5867000	4492000	2	2	2	2	2	2
High	Master Protein	1346344	*CON* Keratin, type ii cytoskeletal 6a (cytokeratin 6a) (CK 6a) (k6a keratin) gi2119221pirA57398 keratin type II - human gi908779 (L42583) keratin type II [Homo sapiens]	TRUE	0	90.7461	25.1773	18	78	5	1	564	60.008	8	High	High	High	High	High	High	High	High	High	High		3853	ENSG00000205420	KRT6A	12	cell differentiation;cell organization and biogenesis;regulation of biological process	membrane;nucleus	catalytic activity;motor activity;protein binding;structural molecule activity	Pf00038, Pf04111, Pf13166	1.292	0.542	2.173	0.567	1.107	0.742	1.02	1.802	1.053	1455000	610100	2447000	638700	1126000	1247000	836000
Checked	Confidence	Annotated Sequence	Modifications	Modifications in Master Proteins	Contaminant	Qvality PEP	Qvality q-value	# Protein Groups	# Proteins	# PSMs	Master Protein Accessions	Positions in Master Proteins	# Missed Cleavages	Theo. MH+ [Da]	Found in Sample: [S1] F1: 126, Sample	Found in Sample: [S2] F1: 127N, Sample	Found in Sample: [S3] F1: 127C, Sample	Found in Sample: [S4] F1: 128N, Sample	Found in Sample: [S5] F1: 128C, Control	Found in Sample: [S6] F1: 129N, Sample	Found in Sample: [S7] F1: 129C, Sample	Found in Sample: [S8] F1: 130N, Sample	Found in Sample: [S9] F1: 130C, Sample	Found in Sample: [S10] F1: 131, Sample	Abundance Ratio: (F1, 126) / (F1, 128C)	Abundance Ratio: (F1, 127N) / (F1, 128C)	Abundance Ratio: (F1, 127C) / (F1, 128C)	Abundance Ratio: (F1, 128N) / (F1, 128C)	Abundance Ratio: (F1, 129N) / (F1, 128C)	Abundance Ratio: (F1, 129C) / (F1, 128C)	Abundance Ratio: (F1, 130N) / (F1, 128C)	Abundance Ratio: (F1, 130C) / (F1, 128C)	Abundance Ratio: (F1, 131) / (F1, 128C)	Abundance: F1: 126, Sample	Abundance: F1: 127N, Sample	Abundance: F1: 127C, Sample	Abundance: F1: 128N, Sample	Abundance: F1: 128C, Control	Abundance: F1: 129N, Sample	Abundance: F1: 129C, Sample	Abundance: F1: 130N, Sample	Abundance: F1: 130C, Sample	Abundance: F1: 131, Sample	Abundances Count: F1: 126, Sample	Abundances Count: F1: 127N, Sample	Abundances Count: F1: 127C, Sample	Abundances Count: F1: 128N, Sample	Abundances Count: F1: 128C, Control	Abundances Count: F1: 129N, Sample
FALSE	High	[R].TAAENEFVTLK.[K]	2xTMT6plex [N-Term; K11]		TRUE	0.000832749	0	1	13	2	1346344	1346344 [261-271]	0	1680.96	High	High	High	High	High	High	High	High	High	High	1.59	0.634	2.932	0.66	0.945	0.514	0.703	2.283	0.982	661000	263700	1219000	274600	415800	392900	213600	292500	949500	408200	2	2	2	2	2	2
FALSE	High	[K].LEGLEDALQK.[A]	2xTMT6plex [N-Term; K10]		TRUE	0.00293825	0	1	13	1	1346344	1346344 [427-436]	0	1573.92	High	High	High	High	High	High	High	High	High	High	1	0.374	1.549	0.459	1.093	0.946	1.158	1.345	1.186	275800	103000	426900	126600	275700	301400	260900	319300	370900	326900	1	1	1	1	1	1
FALSE	High	[K].WTLLQEQGTK.[T]	2xTMT6plex [N-Term; K10]		TRUE	0.00222776	0	3	13	6	125105; 1346344; 88052	125105 [200-209]; 1346344 [195-204]; 88052 [199-208]	0	1661.96	High	High	High	High	High	High	High	High	High	High	0.801	0.37	0.741	0.517	0.889	0.704	0.686	1.005	0.52	519900	240000	481300	335800	649300	577100	456800	445700	652400	337400	3	3	3	3	3	3
FALSE	High	[K].NKLEGLEDALQK.[A]	3xTMT6plex [N-Term; K2; K12]		TRUE	0.000832749	0	1	10	1	1346344	1346344 [425-436]	1	2045.22	High	High	High	High	High	High	High	High	High	High	1.196	0.555	1.686	0.496	0.982	0.852	1.275	1.51	1.086	290200	134800	409000	120300	242600	238200	206700	309300	366500	263600	1	1	1	1	1	1
FALSE	High	[R].GMQDLVEDFK.[N]	2xTMT6plex [N-Term; K10]		TRUE	0.00268597	0	1	3	2	1346344	1346344 [241-250]	0	1639.88	High	High	High	High	High	High	High	High	High	High	1.186	0.565	2.044	0.611	1.638	0.807	1.182	1.782	0.973	227700	108500	392500	117200	192000	314600	154900	227000	342300	186800	2	2	2	2	2	2
FALSE	High	[-R].QNLEPLFEQYINNLR.[R]	1xTMT6plex [N-Term]		TRUE	0.000201619	0	3	14	5	125105; 1346344; 88052	125105 [213-227]; 1346344 [208-222]; 88052 [212-226]	0	2120.13	High	High	High	High	High	High	High	High	High	High	0.767	1.218	1.276	0.701	1.508	0.938	1.491	1.735	1.747	59410	94350	98860	54340	77490	116900	72650	115500	134400	135400	4	4	4	4	4	4
FALSE	High	[R].GSGGLGGACGGAGFGSR.[S]	1xTMT6plex [N-Term]; 1xCarbamidomethyl [C9]		TRUE	0.000624279	0	1	8	1	1346344	1346344 [43-59]	0	1653.8	High	High	High	High	High	High	High	High	High	High
FALSE	High	[R].NLDLDSIIAEVKAQYEEIAQR.[S]	2xTMT6plex [N-Term; K12]		TRUE	1.93744e-06	0	2	13	7	254622; 1346344	254622 [348-368]; 1346344 [327-347]	1	2876.58	High	High	High	High	High	High	High	High	High	High	0.127	0.478	0.129	0.192	2.422	0.16	0.257	0.152	0.205	27810	104600	28310	41980	218800	529900	34910	56110	33280	44850	3	3	3	3	3	3
FALSE	High	[R].NLDLDSIIAEVKAQYEEIAQR.[S]	2xTMT6plex [N-Term; K12]; 2xDeamidated [Q14; Q20]		TRUE	0.00259705	0	2	13	1	254622; 1346344	254622 [348-368]; 1346344 [327-347]	1	2878.54	High	High	High	High	High	High	High	High	High	High
FALSE	High	[R].NLDLDSIIAEVKAQYEEIAQR.[S]	2xTMT6plex [N-Term; K12]; 1xDeamidated [Q14]		TRUE	4.15761e-06	0	2	13	5	254622; 1346344	254622 [348-368]; 1346344 [327-347]	1	2877.56	High	High	High	High	High	High	High	High	High	High	0.053	0.505	0.1	0.163	2.731	0.206	0.284	0.185	0.142	5769	54750	10840	17710	108500	296300	22330	30820	20020	15440	2	2	2	2	2	2
FALSE	High	[K].LALDVEIATYR.[K]	1xTMT6plex [N-Term]		TRUE	0.0022529	0	4	29	3	125105; 254622; 1346344; 88052	125105 [461-471]; 254622 [477-487]; 1346344 [456-466]; 88052 [460-470]	0	1492.86	High	High	High	High	High	High	High	High	High	High	0.932	0.701	3.658	2.091	0.878	1.68	0.664	2.009	0.816	557100	418800	2187000	1250000	597700	524600	1004000	396900	1201000	488000	2	2	2	2	2	2
FALSE	High	[R].NLDLDSIIAEVK.[A]	2xTMT6plex [N-Term; K12]		TRUE	0.000122559	0	4	19	10	125105; 254622; 1346344; 88052	125105 [332-343]; 254622 [348-359]; 1346344 [327-338]; 88052 [331-342]	0	1788.05	High	High	High	High	High	High	High	High	High	High	1.42	0.564	1.75	1.314	0.448	1.109	0.291	1.649	0.364	1886000	748600	2324000	1745000	1328000	595100	1472000	386500	2189000	483700	7	7	7	7	7	7
FALSE	High	[KR].AQYEEIAQR.[S]	1xTMT6plex [N-Term]		TRUE	0.0129778	0.00117917	2	15	4	254622; 1346344	254622 [360-368]; 1346344 [339-347]	0	1336.71	High	High	High	High	High	High	High	High	High	High	1.05	0.675	1.368	1.071	0.888	0.876	1.553	1.166	1.054	792100	509600	1033000	808200	754700	669800	661400	1172000	879700	795800	3	3	3	3	3	3
FALSE	High	[KR].NKYEDEINK.[R]	3xTMT6plex [N-Term; K2; K9]		TRUE	0.0128338	0.00117917	3	25	7	125105; P04264; 1346344	125105 [256-264]; P04264 [268-276]; 1346344 [251-259]	1	1840.04	High	High	High	High	High	High	High	High	High	High	1.596	0.273	1.321	0.579	0.793	1.014	1.005	1.331	0.967	7240000	1240000	5996000	2628000	4537000	3600000	4603000	4558000	6041000	4389000	4	4	4	4	4	4
FALSE	High	[KR-].YEDEINK.[R]	2xTMT6plex [N-Term; K7]		TRUE	0.112298	0.00171593	4	40	4	125105; 254622; P04264; 1346344	125105 [258-264]; 254622 [274-280]; P04264 [270-276]; 1346344 [253-259]	0	1368.74	High	High	High	High	High	High	High	High	High	High	1.444	0.29	1.128	0.499	0.647	0.596	0.618	1.063	0.411	2672000	536200	2087000	923000	1851000	1197000	1103000	1143000	1967000	760700	1	1	1	1	1	1
FALSE	High	[R].QLDSIVGER.[G]	1xTMT6plex [N-Term]		TRUE	0.120018	0.00171593	3	12	2	125105; 1346344; 88052	125105 [229-237]; 1346344 [224-232]; 88052 [228-236]	0	1245.7	High	High	High	High	High	High	High	High	High	High	0.615	0.725	0.874	0.456	1.195	0.665	1.047	0.974	0.816	463500	546400	658600	343900	753900	900700	501200	789400	734600	614900	1	1	1	1	1	1
FALSE	High	[R].KLLEGEECR.[LMI]	2xTMT6plex [N-Term; K1]; 1xCarbamidomethyl [C8]		TRUE	0.0880029	0.00171593	4	31	5	125105; 254622; 1346344; 88052	125105 [472-480]; 254622 [488-496]; 1346344 [467-475]; 88052 [471-479]	1	1591.89	High	High	High	High	High	High	High	High	High	High
FALSE	High	[KR].NKYEDEINKR.[T]	3xTMT6plex [N-Term; K2; K9]		TRUE	0.0233284	0.00171593	3	25	5	125105; P04264; 1346344	125105 [256-265]; P04264 [268-277]; 1346344 [251-260]	2	1996.14	High	High	High	High	High	High	High	High	High	High	0.744	0.168	0.982	0.579	0.564	0.712	0.537	0.949	0.297	6064000	1368000	8005000	4720000	8153000	4598000	5807000	4378000	7736000	2417000	3	3	3	3	3	3
FALSE	High	[KR-].YEDEINKR.[TYA]	2xTMT6plex [N-Term; K7]		TRUE	0.187565	0.00804114	4	40	2	125105; 254622; P04264; 1346344	125105 [258-265]; 254622 [274-281]; P04264 [270-277]; 1346344 [253-260]	1	1524.84	High	High	High	High	High	High	High	High	High	High	2.588	1.691	0.972	0.648	1.196	0.791	0.83	1.437	0.666	1171000	764900	439900	293300	452400	541100	357800	375300	650100	301400	1	1	1	1	1	1
FALSE	High	[R].FLEQQNK.[LAVIM]	2xTMT6plex [N-Term; K7]		TRUE	0.186933	0.00804114	6	62	5	125105; 1346344; 88052; 1903218; 2190400; 1903220	125105 [188-194]; 1346344 [183-189]; 88052 [187-193]; 1903218 [143-149]; 2190400 [126-132]; 1903220 [123-129]	0	1364.79	High	High	High	High	High	High	High	High	High	High
High	Master Protein	B5THE2	Maltase-glucoamylase OS=Mus musculus GN=Mgam PE=2 SV=1	FALSE	0	89.5717	12.9721	25	99	24	1	1827	208.417	5.95	High	High	High	High	High	High	High	High	High	High		232714	ENSMUSG00000068587	Mgam	6	metabolic process		catalytic activity	Pf00088, Pf01055	0.287	0.451	0.407	0.741	2.058	0.929	1.114	2.144	1.478	7984000	12560000	11330000	20630000	27830000	57260000	25860000
Checked	Confidence	Annotated Sequence	Modifications	Modifications in Master Proteins	Contaminant	Qvality PEP	Qvality q-value	# Protein Groups	# Proteins	# PSMs	Master Protein Accessions	Positions in Master Proteins	# Missed Cleavages	Theo. MH+ [Da]	Found in Sample: [S1] F1: 126, Sample	Found in Sample: [S2] F1: 127N, Sample	Found in Sample: [S3] F1: 127C, Sample	Found in Sample: [S4] F1: 128N, Sample	Found in Sample: [S5] F1: 128C, Control	Found in Sample: [S6] F1: 129N, Sample	Found in Sample: [S7] F1: 129C, Sample	Found in Sample: [S8] F1: 130N, Sample	Found in Sample: [S9] F1: 130C, Sample	Found in Sample: [S10] F1: 131, Sample	Abundance Ratio: (F1, 126) / (F1, 128C)	Abundance Ratio: (F1, 127N) / (F1, 128C)	Abundance Ratio: (F1, 127C) / (F1, 128C)	Abundance Ratio: (F1, 128N) / (F1, 128C)	Abundance Ratio: (F1, 129N) / (F1, 128C)	Abundance Ratio: (F1, 129C) / (F1, 128C)	Abundance Ratio: (F1, 130N) / (F1, 128C)	Abundance Ratio: (F1, 130C) / (F1, 128C)	Abundance Ratio: (F1, 131) / (F1, 128C)	Abundance: F1: 126, Sample	Abundance: F1: 127N, Sample	Abundance: F1: 127C, Sample	Abundance: F1: 128N, Sample	Abundance: F1: 128C, Control	Abundance: F1: 129N, Sample	Abundance: F1: 129C, Sample	Abundance: F1: 130N, Sample	Abundance: F1: 130C, Sample	Abundance: F1: 131, Sample	Abundances Count: F1: 126, Sample	Abundances Count: F1: 127N, Sample	Abundances Count: F1: 127C, Sample	Abundances Count: F1: 128N, Sample	Abundances Count: F1: 128C, Control	Abundances Count: F1: 129N, Sample
FALSE	High	[K].DPNNLEFQEIK.[I]	2xTMT6plex [N-Term; K11]		FALSE	0.000799168	0	1	1	6	B5THE2	B5THE2 [867-877]	0	1804.98	High	High	High	High	High	High	High	High	High	High	0.251	0.456	0.405	0.491	2.583	0.993	1.166	3.31	2.067	226700	411700	366300	444100	903700	2335000	897200	1053000	2991000	1868000	3	3	3	3	3	3
FALSE	High	[K].KDFTYDPVNFK.[G]	3xTMT6plex [N-Term; K1; K11]		FALSE	0.00270614	0	1	1	3	B5THE2	B5THE2 [395-405]	1	2061.16	High	High	High	High	High	High	High	High	High	High	0.472	0.915	1.1	4.425	2.551	1.229	1.687	5.196	2.116	64880	125900	151300	608900	137600	351100	169100	232200	715000	291100	1	1	1	1	1	1
FALSE	High	[R].KNPLGLIVALDENK.[E]	3xTMT6plex [N-Term; K1; K14]		FALSE	0.00286232	0	1	1	2	B5THE2	B5THE2 [809-822]	1	2211.37	High	High	High	High	High	High	High	High	High	High
FALSE	High	[R].YEVPHEHVQPFSGNAPSSLNYK.[V]	2xTMT6plex [N-Term; K22]; 1xDeamidated [N14]		FALSE	0.000133078	0	1	1	1	B5THE2	B5THE2 [169-190]	0	2959.5	High	High	High	High	High	High	High	High	High	High	0.477	0.71	0.527	1.75	1.911	1.415	1.085	3.008	1.838	39210	58380	43290	143800	82170	157000	116300	89180	247200	151000	1	1	1	1	1	1
FALSE	High	[R].YEVPHEHVQPFSGNAPSSLNYK.[V]	2xTMT6plex [N-Term; K22]		FALSE	0.000539506	0	1	1	1	B5THE2	B5THE2 [169-190]	0	2958.52	High	High	High	High	High	High	High	High	High	High	0.409	0.654	0.574	1.359	1.51	1.144	0.812	2.578	1.521	35690	57040	50000	118500	87180	131700	99760	70820	224700	132600	1	1	1	1	1	1
FALSE	High	[R].AEGWLFWDDGKR.[I]	2xTMT6plex [N-Term; K11]		FALSE	0.00069065	0	1	1	2	B5THE2	B5THE2 [1720-1731]	1	1938.03	High	High	High	High	High	High	High	High	High	High	0.217	0.33	0.294	0.442	1.212	0.517	0.556	1.15	0.956	140900	214100	190900	287100	649200	787000	335500	360700	746600	620500	1	1	1	1	1	1
FALSE	High	[K].VLDGYLFSK.[T]	2xTMT6plex [N-Term; K9]		FALSE	0.00781986	0	1	1	5	B5THE2	B5THE2 [532-540]	0	1499.89	High	High	High	High	High	High	High	High	High	High	0.276	0.436	0.354	0.977	2.493	0.985	0.939	2.995	1.472	412800	652000	528600	1459000	1494000	3724000	1472000	1402000	4475000	2199000	3	3	3	3	3	3
FALSE	High	[RK].GELFWDDGESK.[D]	2xTMT6plex [N-Term; K11]		FALSE	0.000457599	0	2	2	5	B5THE2; F8VQM5	B5THE2 [826-836]; F8VQM5 [818-828]	0	1740.88	High	High	High	High	High	High	High	High	High	High	0.432	0.685	0.74	0.884	2.35	0.808	1.297	3.219	2.019	349100	553700	598200	714500	808400	1900000	652900	1049000	2602000	1633000	3	3	3	3	3	3
FALSE	High	[K].ELHSNTQDPAK.[S]	2xTMT6plex [N-Term; K11]		FALSE	0.00345089	0	1	1	1	B5THE2	B5THE2 [1374-1384]	0	1697.92	High	High	High	High	High	High	High	High	High	High
FALSE	High	[R].AEGWLFWDDGK.[R]	2xTMT6plex [N-Term; K11]		FALSE	0.000695839	0	1	1	5	B5THE2	B5THE2 [1720-1730]	0	1781.93	High	High	High	High	High	High	High	High	High	High	0.218	0.347	0.388	0.483	2.232	1.209	1.138	1.952	1.831	125300	199300	223000	277300	574600	1283000	694500	654200	1122000	1052000	4	4	4	4	4	4
FALSE	High	[K].TLCMDAVQHWGK.[Q]	2xTMT6plex [N-Term; K12]; 1xCarbamidomethyl [C3]		FALSE	0.000845307	0	1	1	4	B5THE2	B5THE2 [541-552]	0	1903.99	High	High	High	High	High	High	High	High	High	High	0.284	0.544	0.473	1.164	1.887	0.978	0.895	3.384	1.585	233600	447500	389100	957200	822200	1552000	803900	736000	2782000	1303000	2	2	2	2	2	2
FALSE	High	[K].VATITNIHLR.[L]	1xTMT6plex [N-Term]		FALSE	0.00606725	0	1	1	2	B5THE2	B5THE2 [910-919]	0	1366.84	High	High	High	High	High	High	High	High	High	High	0.592	0.782	1.053	2.121	1.584	0.771	1.953	1.057	1.556	81730	107900	145200	292600	138000	218600	106400	269500	145800	214700	2	2	2	2	2	2
FALSE	High	[K].TLCMDAVQHWGK.[Q]	2xTMT6plex [N-Term; K12]; 1xCarbamidomethyl [C3]; 1xOxidation [M4]		FALSE	0.00826976	0	1	1	3	B5THE2	B5THE2 [541-552]	0	1919.99	High	High	High	High	High	High	High	High	High	High
FALSE	High	[R].AYVAFPDFFR.[N]	1xTMT6plex [N-Term]		FALSE	0.0292325	0.00171593	1	1	6	B5THE2	B5THE2 [1352-1361]	0	1461.77	High	High	High	High	High	High	High	High	High	High	0.275	0.43	0.271	0.312	1.794	0.753	1.125	1.892	2.004	207500	324000	204300	235100	754400	1353000	568100	848900	1427000	1512000	5	5	5	5	5	5
FALSE	High	[R].INCIPDQSSNK.[G]	2xTMT6plex [N-Term; K11]; 1xCarbamidomethyl [C3]		FALSE	0.0198923	0.00171593	1	1	4	B5THE2	B5THE2 [74-84]	0	1733.93	High	High	High	High	High	High	High	High	High	High	0.339	0.701	0.348	0.873	1.66	0.992	1.46	1.7	1.498	295800	612300	303600	762300	873100	1449000	866000	1275000	1484000	1308000	3	3	3	3	3	3
FALSE	High	[K].LQVTYHK.[N]	2xTMT6plex [N-Term; K7]		FALSE	0.0849241	0.00171593	1	1	2	B5THE2	B5THE2 [1014-1020]	0	1346.82	High	High	High	High	High	High	High	High	High	High	0.829	1.005	2.484	4.657	1.665	3.7	1.081	3.04	1.456	179400	217300	537200	1007000	216300	360000	800200	233800	657500	314900	1	1	1	1	1	1
FALSE	High	[R].QDPVSWNK.[T]	2xTMT6plex [N-Term; K8]; 1xDeamidated [N7]		FALSE	0.0518231	0.00171593	1	1	4	B5THE2	B5THE2 [1566-1573]	0	1432.78	High	High	High	High	High	High	High	High	High	High	0.737	0.981	0.51	0.751	1.729	1.898	1.032	2.431	2	1187000	1579000	820300	1209000	1610000	2784000	3055000	1662000	3914000	3220000	4	4	4	4	4	4
FALSE	High	[K].IYDPNHSR.[Y]	1xTMT6plex [N-Term]		FALSE	0.0539394	0.00171593	1	1	6	B5THE2	B5THE2 [1028-1035]	0	1230.64	High	High	High	High	High	High	High	High	High	High	0.374	0.413	0.331	0.478	1.945	0.688	1.234	1.379	1.337	1620000	1787000	1433000	2071000	4331000	8424000	2978000	5344000	5973000	5793000	5	5	5	5	5	5
FALSE	High	[K].ELHNNGQK.[L]	2xTMT6plex [N-Term; K8]; 1xDeamidated [N5]		FALSE	0.111905	0.00171593	1	1	2	B5THE2	B5THE2 [413-420]	0	1398.77	High	High	High	High	High	High	High	High	High	High	0.614	0.641	0.361	0.814	1.943	0.52	0.857	1.326	1.003	86820	90550	50960	115000	141400	274700	73500	121200	187500	141800	1	1	1	1	1	1
FALSE	High	[R].NHNGQGYK.[D]	2xTMT6plex [N-Term; K8]; 1xDeamidated [N3]		FALSE	0.0276566	0.00171593	1	1	2	B5THE2	B5THE2 [659-666]	0	1376.73	High	High	High	High	High	High	High	High	High	High	0.895	0.873	0.793	0.577	2.289	0.665	1.372	2.521	1.987	58480	57070	51850	37690	65370	149600	43470	89670	164800	129900	1	1	1	1	1	1
FALSE	High	[R].STFAGSGK.[F]	2xTMT6plex [N-Term; K8]		FALSE	0.0388186	0.00171593	1	1	6	B5THE2	B5THE2 [587-594]	0	1212.7	High	High	High	High	High	High	High	High	High	High	0.099	0.187	0.362	0.778	2.265	0.738	0.91	2.139	1.087	607500	1148000	2219000	4770000	6132000	13890000	4526000	5583000	13120000	6663000	3	3	3	3	3	3
FALSE	High	[K].EFELFHK.[E]	2xTMT6plex [N-Term; K7]		FALSE	0.0553293	0.00171593	1	1	6	B5THE2	B5THE2 [487-493]	0	1407.8	High	High	High	High	High	High	High	High	High	High	0.168	0.288	0.308	0.67	2.104	0.727	1.165	2.046	1.511	425800	727000	778800	1694000	2528000	5319000	1837000	2944000	5174000	3821000	3	3	3	3	3	3
FALSE	High	[K].ENPFGIQIR.[R]	1xTMT6plex [N-Term]; 1xDeamidated [Q7]		FALSE	0.0223971	0.00171593	1	1	8	B5THE2	B5THE2 [1063-1071]	0	1303.72	High	High	High	High	High	High	High	High	High	High	0.431	0.847	0.442	0.578	1.793	1.479	1.113	2.457	1.763	514700	1012000	528400	690900	1195000	2142000	1767000	1329000	2935000	2107000	4	4	4	4	4	4
FALSE	High	[R].GVENDVFIR.[Y]	1xTMT6plex [N-Term]		FALSE	0.123846	0.00171593	1	1	4	B5THE2	B5THE2 [1308-1316]	0	1277.71	High	High	High	High	High	High	High	High	High	High	0.498	0.728	0.541	0.679	2.186	0.798	1.459	1.506	1.606	613000	896000	665800	836100	1232000	2692000	982600	1797000	1854000	1978000	2	2	2	2	2	2
FALSE	High	[R].LYDVLIK.[E]	2xTMT6plex [N-Term; K7]		FALSE	0.148787	0.00250807	1	1	4	B5THE2	B5THE2 [1056-1062]	0	1321.85	High	High	High	High	High	High	High	High	High	High	0.24	0.552	0.511	0.314	1.779	1.281	1.619	1.889	1.688	474400	1093000	1012000	620900	1979000	3521000	2536000	3205000	3739000	3340000	3	3	3	3	3	3
FALSE	High	[R].ETWNIDK.[Q]	2xTMT6plex [N-Term; K7]		FALSE	0.153984	0.00250807	1	1	3	B5THE2	B5THE2 [1620-1626]	0	1363.76	High	High	High	High	High	High	High	High	High	High	0.281	0.63	0.447	0.461	2.135	0.802	1.221	2.868	1.901	196300	439800	312200	322000	698300	1491000	560300	852600	2003000	1327000	2	2	2	2	2	2
FALSE	High	[K].GFPEFVK.[E]	2xTMT6plex [N-Term; K7]		FALSE	0.15611	0.00250807	1	1	2	B5THE2	B5THE2 [406-412]	0	1281.76	High	High	High	High	High	High	High	High	High	High	0.132	0.259	0.271	1.412	2.425	0.485	0.722	3.026	1.383	156200	306600	320300	1672000	1184000	2871000	573700	854500	3582000	1637000	2	2	2	2	2	2
High	Master Protein	P07758	Alpha-1-antitrypsin 1-1 OS=Mus musculus GN=Serpina1a PE=1 SV=4	FALSE	0	88.9961	21.5496	10	124	4	1	413	45.974	5.72	High	High	High	High	High	High	High	High	High	High		20700	ENSMUSG00000066366	Serpina1a	12	defense response;metabolic process;regulation of biological process;response to stimulus	endoplasmic reticulum;extracellular;Golgi	enzyme regulator activity;protein binding	Pf00079	0.222	0.36	0.333	2.122	1.602	1.801	1.583	1.986	1.383	2980000	4825000	4469000	28470000	13420000	21500000	24170000
Checked	Confidence	Annotated Sequence	Modifications	Modifications in Master Proteins	Contaminant	Qvality PEP	Qvality q-value	# Protein Groups	# Proteins	# PSMs	Master Protein Accessions	Positions in Master Proteins	# Missed Cleavages	Theo. MH+ [Da]	Found in Sample: [S1] F1: 126, Sample	Found in Sample: [S2] F1: 127N, Sample	Found in Sample: [S3] F1: 127C, Sample	Found in Sample: [S4] F1: 128N, Sample	Found in Sample: [S5] F1: 128C, Control	Found in Sample: [S6] F1: 129N, Sample	Found in Sample: [S7] F1: 129C, Sample	Found in Sample: [S8] F1: 130N, Sample	Found in Sample: [S9] F1: 130C, Sample	Found in Sample: [S10] F1: 131, Sample	Abundance Ratio: (F1, 126) / (F1, 128C)	Abundance Ratio: (F1, 127N) / (F1, 128C)	Abundance Ratio: (F1, 127C) / (F1, 128C)	Abundance Ratio: (F1, 128N) / (F1, 128C)	Abundance Ratio: (F1, 129N) / (F1, 128C)	Abundance Ratio: (F1, 129C) / (F1, 128C)	Abundance Ratio: (F1, 130N) / (F1, 128C)	Abundance Ratio: (F1, 130C) / (F1, 128C)	Abundance Ratio: (F1, 131) / (F1, 128C)	Abundance: F1: 126, Sample	Abundance: F1: 127N, Sample	Abundance: F1: 127C, Sample	Abundance: F1: 128N, Sample	Abundance: F1: 128C, Control	Abundance: F1: 129N, Sample	Abundance: F1: 129C, Sample	Abundance: F1: 130N, Sample	Abundance: F1: 130C, Sample	Abundance: F1: 131, Sample	Abundances Count: F1: 126, Sample	Abundances Count: F1: 127N, Sample	Abundances Count: F1: 127C, Sample	Abundances Count: F1: 128N, Sample	Abundances Count: F1: 128C, Control	Abundances Count: F1: 129N, Sample
FALSE	High	[K].KPFDPENTEEAEFHVDESTTVK.[V]	3xTMT6plex [N-Term; K1; K22]		FALSE	1.10437e-05	0	1	2	3	P07758	P07758 [214-235]	0	3236.66	High	High	High	High	High	High	High	High	High	High	0.122	0.316	0.296	1.504	1.264	1.106	1.546	2.48	1.567	93400	241900	226900	1152000	766100	968300	847300	1184000	1900000	1200000	3	3	3	3	3	3
FALSE	High	[K].NHYQAEVFSVNFAESEEAKK.[V]	3xTMT6plex [N-Term; K19; K20]; 1xDeamidated [N11]		FALSE	2.51778e-06	0	3	5	4	P07758; P22599; Q00898	P07758 [154-173]; P22599 [154-173]; Q00898 [154-173]	1	3015.57	High	High	High	High	High	High	High	High	High	High	0.368	0.81	0.496	3.357	1.278	3.516	1.073	2.711	1.684	52010	114500	70200	474600	141400	180600	497200	151700	383300	238100	2	2	2	2	2	2
FALSE	High	[K].NHYQAEVFSVNFAESEEAK.[K]	2xTMT6plex [N-Term; K19]		FALSE	6.73815e-06	0	3	5	8	P07758; P22599; Q00898	P07758 [154-172]; P22599 [154-172]; Q00898 [154-172]	0	2657.32	High	High	High	High	High	High	High	High	High	High	0.271	0.453	0.306	2.028	0.897	1.838	1.378	1.832	1.092	276700	463700	312800	2074000	1023000	916800	1880000	1409000	1873000	1117000	5	5	5	5	5	5
FALSE	High	[K].NHYQAEVFSVNFAESEEAK.[K]	2xTMT6plex [N-Term; K19]; 1xDeamidated [N11]		FALSE	0.000610418	0	3	5	3	P07758; P22599; Q00898	P07758 [154-172]; P22599 [154-172]; Q00898 [154-172]	0	2658.31	High	High	High	High	High	High	High	High	High	High
FALSE	High	[R].LSISGEYNLK.[T]	2xTMT6plex [N-Term; K10]		FALSE	0.00183392	0	1	2	16	P07758	P07758 [309-318]	0	1581.93	High	High	High	High	High	High	High	High	High	High	0.145	0.213	0.291	1.455	1.715	1.144	1.693	1.873	1.397	1386000	2033000	2778000	13900000	9555000	16390000	10940000	16170000	17900000	13350000	10	10	10	10	10	10
FALSE	High	[K].NHYQAEVFSVNFAESEEAKK.[V]	3xTMT6plex [N-Term; K19; K20]		FALSE	1.45325e-07	0	3	5	7	P07758; P22599; Q00898	P07758 [154-173]; P22599 [154-173]; Q00898 [154-173]	1	3014.58	High	High	High	High	High	High	High	High	High	High	0.254	0.579	0.63	6.127	1.718	5.86	1.374	4.908	1.869	107500	245400	266700	2596000	423700	727800	2483000	582200	2079000	791900	4	4	4	4	4	4
FALSE	High	[K].KVINDFVEK.[G]	3xTMT6plex [N-Term; K1; K9]; 1xDeamidated [N4]		FALSE	0.000772702	0	3	5	12	P07758; P22599; Q00898	P07758 [173-181]; P22599 [173-181]; Q00898 [173-181]	1	1780.08	High	High	High	High	High	High	High	High	High	High	0.213	0.296	0.296	0.991	1.394	1.752	1.692	1.217	1.091	709300	984000	985200	3298000	3330000	4642000	5832000	5635000	4053000	3631000	3	3	3	3	3	3
FALSE	High	[K].KVINDFVEK.[G]	3xTMT6plex [N-Term; K1; K9]		FALSE	0.00087426	0	3	5	17	P07758; P22599; Q00898	P07758 [173-181]; P22599 [173-181]; Q00898 [173-181]	1	1779.1	High	High	High	High	High	High	High	High	High	High	0.089	0.189	0.083	1.261	1.483	2.17	1.984	1.723	1.24	2861000	6078000	2669000	40430000	32080000	47580000	69610000	63630000	55260000	39770000	11	11	11	11	11	11
FALSE	High	[K].IAEAVKK.[L]	3xTMT6plex [N-Term; K6; K7]		FALSE	0.0586369	0.00171593	1	1	4	P07758	P07758 [187-193]	1	1445.97	High	High	High	High	High	High	High	High	High	High	0.469	0.716	0.436	6.929	1.168	6.096	1.542	1.952	1.344	780000	1190000	724400	11520000	1662000	1942000	10130000	2564000	3245000	2234000	2	2	2	2	2	2
FALSE	High	[K].LSQAVHK.[A]	2xTMT6plex [N-Term; K7]		FALSE	0.116301	0.00171593	2	3	5	P07758; Q00898	P07758 [348-354]; Q00898 [348-354]	0	1240.78	High	High	High	High	High	High	High	High	High	High	0.49	1.087	0.37	2.302	1.064	3.552	1.316	3.827	1.545	904500	2007000	682500	4251000	1847000	1964000	6560000	2430000	7067000	2854000	2	2	2	2	2	2
FALSE	High	[K].VINDFVEK.[G]	2xTMT6plex [N-Term; K8]; 1xDeamidated [N3]		FALSE	0.0402699	0.00171593	3	5	10	P07758; P22599; Q00898	P07758 [174-181]; P22599 [174-181]; Q00898 [174-181]	0	1422.82	High	High	High	High	High	High	High	High	High	High	0.25	0.443	0.316	0.726	1.701	1.422	2.345	1.553	1.455	1045000	1855000	1322000	3040000	4189000	7127000	5957000	9823000	6505000	6097000	8	8	8	8	8	8
FALSE	High	[K].VINDFVEK.[G]	2xTMT6plex [N-Term; K8]		FALSE	0.0306696	0.00171593	3	5	21	P07758; P22599; Q00898	P07758 [174-181]; P22599 [174-181]; Q00898 [174-181]	0	1421.84	High	High	High	High	High	High	High	High	High	High	0.156	0.231	0.141	0.708	1.733	1.67	2.36	1.711	1.426	2033000	3014000	1835000	9241000	13050000	22620000	21800000	30810000	22340000	18610000	12	12	12	12	12	12
FALSE	High	[R].LAQIHFPR.[L]	1xTMT6plex [N-Term]		FALSE	0.0223971	0.00171593	1	2	8	P07758	P07758 [301-308]	0	1210.73	High	High	High	High	High	High	High	High	High	High	0.502	0.946	0.514	1.32	1.532	1.566	0.925	2.511	1.236	720900	1360000	739500	1898000	1437000	2202000	2250000	1330000	3610000	1777000	7	7	7	7	7	7
FALSE	High	[K].VVDPTHK.[-]	2xTMT6plex [N-Term; K7]		FALSE	0.18195	0.00651022	3	4	6	P07758; P22599; Q00898	P07758 [407-413]; P22599 [407-413]; Q00898 [407-413]	0	1253.76	High	High	High	High	High	High	High	High	High	High	0.222	0.45	0.137	0.838	1.033	1.122	2.012	2.016	1.544	645300	1309000	398700	2440000	2910000	3006000	3265000	5855000	5867000	4492000	2	2	2	2	2	2
High	Master Protein	F8WIV2	Serpin B6 OS=Mus musculus GN=Serpinb6a PE=2 SV=1	FALSE	0	87.2761	36.0902	14	97	14	1	399	44.745	6.38	High	High	High	High	High	High	High	High	High	High		20719	ENSMUSG00000060147	Serpinb6a	13	regulation of biological process;response to stimulus	cytoplasm	enzyme regulator activity;protein binding	Pf00079	0.228	0.445	0.405	1.763	1.836	1.13	0.999	2.415	1.717	4390000	8571000	7797000	33980000	19270000	35380000	21770000
Checked	Confidence	Annotated Sequence	Modifications	Modifications in Master Proteins	Contaminant	Qvality PEP	Qvality q-value	# Protein Groups	# Proteins	# PSMs	Master Protein Accessions	Positions in Master Proteins	# Missed Cleavages	Theo. MH+ [Da]	Found in Sample: [S1] F1: 126, Sample	Found in Sample: [S2] F1: 127N, Sample	Found in Sample: [S3] F1: 127C, Sample	Found in Sample: [S4] F1: 128N, Sample	Found in Sample: [S5] F1: 128C, Control	Found in Sample: [S6] F1: 129N, Sample	Found in Sample: [S7] F1: 129C, Sample	Found in Sample: [S8] F1: 130N, Sample	Found in Sample: [S9] F1: 130C, Sample	Found in Sample: [S10] F1: 131, Sample	Abundance Ratio: (F1, 126) / (F1, 128C)	Abundance Ratio: (F1, 127N) / (F1, 128C)	Abundance Ratio: (F1, 127C) / (F1, 128C)	Abundance Ratio: (F1, 128N) / (F1, 128C)	Abundance Ratio: (F1, 129N) / (F1, 128C)	Abundance Ratio: (F1, 129C) / (F1, 128C)	Abundance Ratio: (F1, 130N) / (F1, 128C)	Abundance Ratio: (F1, 130C) / (F1, 128C)	Abundance Ratio: (F1, 131) / (F1, 128C)	Abundance: F1: 126, Sample	Abundance: F1: 127N, Sample	Abundance: F1: 127C, Sample	Abundance: F1: 128N, Sample	Abundance: F1: 128C, Control	Abundance: F1: 129N, Sample	Abundance: F1: 129C, Sample	Abundance: F1: 130N, Sample	Abundance: F1: 130C, Sample	Abundance: F1: 131, Sample	Abundances Count: F1: 126, Sample	Abundances Count: F1: 127N, Sample	Abundances Count: F1: 127C, Sample	Abundances Count: F1: 128N, Sample	Abundances Count: F1: 128C, Control	Abundances Count: F1: 129N, Sample
FALSE	High	[K].FYEAELEELDFQGATEESR.[Q]	1xTMT6plex [N-Term]; 1xDeamidated [Q12]		FALSE	1.59375e-05	0	1	7	1	F8WIV2	F8WIV2 [136-154]	0	2493.15	High	High	High	High	High	High	High	High	High	High
FALSE	High	[K].FYEAELEELDFQGATEESR.[Q]	1xTMT6plex [N-Term]		FALSE	1.98145e-06	0	1	7	15	F8WIV2	F8WIV2 [136-154]	0	2492.17	High	High	High	High	High	High	High	High	High	High	0.375	0.674	0.635	1.364	1.773	1.033	0.911	2.291	2.011	186000	334800	315000	677200	496400	880300	512600	452400	1137000	998100	10	10	10	10	10	10
FALSE	High	[K].MDEEEVEVFLPK.[F]	2xTMT6plex [N-Term; K12]		FALSE	0.00166393	0	1	2	12	F8WIV2	F8WIV2 [285-296]	0	1923.02	High	High	High	High	High	High	High	High	High	High	0.155	0.354	0.204	0.791	1.568	0.754	1.077	1.803	1.968	210500	481300	276800	1074000	1359000	2131000	1025000	1463000	2451000	2675000	9	9	9	9	9	9
FALSE	High	[K].MDEEEVEVFLPK.[F]	2xTMT6plex [N-Term; K12]; 1xOxidation [M1]		FALSE	0.000330433	0	1	2	7	F8WIV2	F8WIV2 [285-296]	0	1939.01	High	High	High	High	High	High	High	High	High	High	0.294	0.496	0.341	0.857	1.501	0.809	0.974	1.752	1.748	238800	402500	276900	695500	811800	1219000	656800	791000	1422000	1419000	5	5	5	5	5	5
FALSE	High	[K].FKLEENYNMNDALYK.[L]	3xTMT6plex [N-Term; K2; K15]		FALSE	8.94955e-05	0	1	2	2	F8WIV2	F8WIV2 [297-311]	1	2579.38	High	High	High	High	High	High	High	High	High	High	0.273	0.415	0.418	1.167	1.7	0.763	0.968	1.251	1.249	109500	166300	167400	467900	400900	681700	306000	388100	501700	500800	2	2	2	2	2	2
FALSE	High	[K].MTYIGEIFTK.[I]	2xTMT6plex [N-Term; K10]		FALSE	0.00252993	0	1	3	9	F8WIV2	F8WIV2 [231-240]	0	1660.94	High	High	High	High	High	High	High	High	High	High	0.309	0.556	0.489	3.378	1.919	2.445	0.923	4.125	2.268	279500	503500	442500	3058000	905200	1737000	2213000	835200	3735000	2054000	9	9	9	9	9	9
FALSE	High	[R].LDKMDEEEVEVFLPK.[F]	3xTMT6plex [N-Term; K3; K15]		FALSE	0.000310065	0	1	2	2	F8WIV2	F8WIV2 [282-296]	1	2508.39	High	High	High	High	High	High	High	High	High	High	0.233	0.544	0.384	1.089	1.688	0.872	1.007	2.168	1.706	16410	38290	27060	76710	70430	118900	61420	70950	152700	120200	1	1	1	1	1	1
FALSE	High	[R].LDKMDEEEVEVFLPK.[F]	3xTMT6plex [N-Term; K3; K15]; 1xOxidation [M4]		FALSE	0.000719672	0	1	2	2	F8WIV2	F8WIV2 [282-296]	1	2524.38	High	High	High	High	High	High	High	High	High	High	0.365	0.775	0.508	0.886	1.462	0.626	0.916	2.052	1.663	30570	64930	42570	74220	83810	122500	52450	76770	171900	139400	1	1	1	1	1	1
FALSE	High	[K].LEENYNMNDALYK.[L]	2xTMT6plex [N-Term; K13]		FALSE	2.44193e-05	0	1	2	3	F8WIV2	F8WIV2 [299-311]	0	2075.05	High	High	High	High	High	High	High	High	High	High	0.085	0.144	0.141	0.837	2.135	0.445	0.787	1.132	1.123	59320	100700	98320	584800	698700	1492000	311100	549900	790900	785000	3	3	3	3	3	3
FALSE	High	[K].NEEKPVQMMFK.[K]	3xTMT6plex [N-Term; K4; K11]		FALSE	0.00231268	0	1	3	6	F8WIV2	F8WIV2 [215-225]	0	2068.15	High	High	High	High	High	High	High	High	High	High	0.359	0.646	0.731	8.581	2.146	3.352	0.983	5.096	1.496	633600	1141000	1290000	15140000	1765000	3788000	5915000	1736000	8994000	2640000	5	5	5	5	5	5
FALSE	High	[K].CSGNGGGDVHQGFQSLLTEVNK.[T]	2xTMT6plex [N-Term; K22]; 1xDeamidated [N4]; 1xCarbamidomethyl [C1]		FALSE	0.0122735	0.00117917	1	8	1	F8WIV2	F8WIV2 [83-104]	0	2763.38	High	High	High	High	High	High	High	High	High	High
FALSE	High	[K].TCDLLASFK.[D]	2xTMT6plex [N-Term; K9]; 1xCarbamidomethyl [C2]		FALSE	0.0111001	0.00117917	1	8	10	F8WIV2	F8WIV2 [122-130]	0	1512.85	High	High	High	High	High	High	High	High	High	High	0.254	0.449	0.422	0.991	1.675	1.115	0.733	3.388	1.934	673300	1190000	1118000	2626000	2651000	4441000	2956000	1943000	8981000	5128000	7	7	7	7	7	7
FALSE	High	[K].ILGEDSSK.[N]	2xTMT6plex [N-Term; K8]		FALSE	0.0471351	0.00171593	1	10	5	F8WIV2	F8WIV2 [39-46]	0	1306.76	High	High	High	High	High	High	High	High	High	High	0.208	0.498	0.657	0.653	2.037	0.547	1.011	1.741	1.63	639500	1535000	2024000	2012000	3081000	6276000	1686000	3115000	5364000	5022000	3	3	3	3	3	3
FALSE	High	[R].QHINTWVAK.[K]	2xTMT6plex [N-Term; K9]		FALSE	0.0503346	0.00171593	1	8	2	F8WIV2	F8WIV2 [155-163]	0	1554.92	High	High	High	High	High	High	High	High	High	High
FALSE	High	[K].LGMTDAFGGR.[A]	1xTMT6plex [N-Term]		FALSE	0.0173409	0.00171593	1	2	2	F8WIV2	F8WIV2 [312-321]	0	1253.65	High	High	High	High	High	High	High	High	High	High	0.319	0.722	0.39	1.062	2.573	0.497	1.328	1.809	1.505	323000	731200	394900	1076000	1013000	2607000	503700	1345000	1833000	1525000	2	2	2	2	2	2
FALSE	High	[K].MTYIGEIFTK.[I]	2xTMT6plex [N-Term; K10]; 1xOxidation [M1]		FALSE	0.0243882	0.00171593	1	3	7	F8WIV2	F8WIV2 [231-240]	0	1676.93	High	High	High	High	High	High	High	High	High	High	0.314	0.695	0.467	2.753	1.774	1.99	0.995	3.657	2.12	293400	650700	437200	2576000	935700	1660000	1862000	931200	3422000	1984000	4	4	4	4	4	4
FALSE	High	[K].TNGILFCGR.[F]	1xTMT6plex [N-Term]; 1xCarbamidomethyl [C7]		FALSE	0.0331391	0.00171593	1	2	2	F8WIV2	F8WIV2 [387-395]	0	1266.68	High	High	High	High	High	High	High	High	High	High	0.27	0.447	0.324	0.742	1.708	0.712	1.112	1.839	1.756	171000	283700	205300	470500	634000	1083000	451200	705000	1166000	1114000	1	1	1	1	1	1
FALSE	High	[K].TNGILFCGR.[F]	1xTMT6plex [N-Term]; 1xDeamidated [N2]; 1xCarbamidomethyl [C7]		FALSE	0.030783	0.00171593	1	2	4	F8WIV2	F8WIV2 [387-395]	0	1267.67	High	High	High	High	High	High	High	High	High	High	0.345	0.527	0.322	0.888	1.552	0.777	1.151	1.723	1.568	207000	315900	192800	531800	599100	930100	465400	689700	1033000	939200	2	2	2	2	2	2
FALSE	High	[K].QGLFLSK.[V]	2xTMT6plex [N-Term; K7]		FALSE	0.160991	0.00250807	1	3	5	F8WIV2	F8WIV2 [331-337]	0	1250.79	High	High	High	High	High	High	High	High	High	High	0.085	0.168	0.13	0.753	1.65	0.742	1.107	1.43	1.604	319000	631300	489000	2834000	3766000	6214000	2796000	4168000	5384000	6039000	3	3	3	3	3	3
High	Master Protein	Q6P8U6	Pancreatic triacylglycerol lipase OS=Mus musculus GN=Pnlip PE=1 SV=1	FALSE	0	79.1797	21.2903	9	72	8	1	465	51.395	6.83	High	High	High	High	High	High	High	High	High	High		69060	ENSMUSG00000046008	Pnlip	19	metabolic process;regulation of biological process;transport	extracellular	catalytic activity;metal ion binding;protein binding	Pf00151, Pf01477, Pf12697	0.335	0.584	0.375	0.892	1.565	0.706	5.535	4.921	4.897	1764000	3074000	1974000	4695000	5266000	8243000	3717000
Checked	Confidence	Annotated Sequence	Modifications	Modifications in Master Proteins	Contaminant	Qvality PEP	Qvality q-value	# Protein Groups	# Proteins	# PSMs	Master Protein Accessions	Positions in Master Proteins	# Missed Cleavages	Theo. MH+ [Da]	Found in Sample: [S1] F1: 126, Sample	Found in Sample: [S2] F1: 127N, Sample	Found in Sample: [S3] F1: 127C, Sample	Found in Sample: [S4] F1: 128N, Sample	Found in Sample: [S5] F1: 128C, Control	Found in Sample: [S6] F1: 129N, Sample	Found in Sample: [S7] F1: 129C, Sample	Found in Sample: [S8] F1: 130N, Sample	Found in Sample: [S9] F1: 130C, Sample	Found in Sample: [S10] F1: 131, Sample	Abundance Ratio: (F1, 126) / (F1, 128C)	Abundance Ratio: (F1, 127N) / (F1, 128C)	Abundance Ratio: (F1, 127C) / (F1, 128C)	Abundance Ratio: (F1, 128N) / (F1, 128C)	Abundance Ratio: (F1, 129N) / (F1, 128C)	Abundance Ratio: (F1, 129C) / (F1, 128C)	Abundance Ratio: (F1, 130N) / (F1, 128C)	Abundance Ratio: (F1, 130C) / (F1, 128C)	Abundance Ratio: (F1, 131) / (F1, 128C)	Abundance: F1: 126, Sample	Abundance: F1: 127N, Sample	Abundance: F1: 127C, Sample	Abundance: F1: 128N, Sample	Abundance: F1: 128C, Control	Abundance: F1: 129N, Sample	Abundance: F1: 129C, Sample	Abundance: F1: 130N, Sample	Abundance: F1: 130C, Sample	Abundance: F1: 131, Sample	Abundances Count: F1: 126, Sample	Abundances Count: F1: 127N, Sample	Abundances Count: F1: 127C, Sample	Abundances Count: F1: 128N, Sample	Abundances Count: F1: 128C, Control	Abundances Count: F1: 129N, Sample
FALSE	High	[K].GEENWLSDMCK.[N]	2xTMT6plex [N-Term; K11]; 1xCarbamidomethyl [C10]		FALSE	0.000814261	0	1	1	9	Q6P8U6	Q6P8U6 [98-108]	0	1826.88	High	High	High	High	High	High	High	High	High	High	0.331	0.761	0.248	0.598	2.089	0.696	6.136	5.432	5.744	567900	1306000	425300	1026000	1715000	3583000	1193000	10530000	9318000	9853000	5	5	5	5	5	5
FALSE	High	[R].YQVTVTLSGQK.[V]	2xTMT6plex [N-Term; K11]		FALSE	0.00286232	0	1	1	1	Q6P8U6	Q6P8U6 [357-367]	0	1681.99	High	High	High	High	High	High	High	High	High	High
FALSE	High	[R].LYQTFYLNTGDK.[S]	2xTMT6plex [N-Term; K12]		FALSE	0.000313566	0	1	1	3	Q6P8U6	Q6P8U6 [338-349]	0	1921.05	High	High	High	High	High	High	High	High	High	High	0.485	0.564	0.619	0.768	1.731	1.046	7.104	2.431	5.528	21490	25000	27460	34060	44350	76780	46390	315100	107800	245200	1	1	1	1	1	1
FALSE	High	[R].IIIHGFIDKGEENWLSDMCK.[N]	3xTMT6plex [N-Term; K9; K20]; 1xCarbamidomethyl [C19]		FALSE	0.000469745	0	1	1	5	Q6P8U6	Q6P8U6 [89-108]	1	3092.65	High	High	High	High	High	High	High	High	High	High	0.386	0.352	0.331	1.623	0.874	0.513	4.351	4.505	2.597	155100	141300	132700	651700	401500	350700	206100	1747000	1809000	1043000	1	1	1	1	1	1
FALSE	High	[R].IIIHGFIDKGEENWLSDMCK.[N]	3xTMT6plex [N-Term; K9; K20]; 1xDeamidated [N13]; 1xCarbamidomethyl [C19]		FALSE	0.000336675	0	1	1	3	Q6P8U6	Q6P8U6 [89-108]	1	3093.64	High	High	High	High	High	High	High	High	High	High	0.292	0.416	0.335	1.074	0.894	0.754	3.776	3.842	2.275	19390	27660	22290	71380	66470	59400	50100	251000	255400	151200	1	1	1	1	1	1
FALSE	High	[R].IIIHGFIDKGEENWLSDMCK.[N]	3xTMT6plex [N-Term; K9; K20]; 1xCarbamidomethyl [C19]; 1xOxidation [M18]		FALSE	0.000164724	0	1	1	8	Q6P8U6	Q6P8U6 [89-108]	1	3108.65	High	High	High	High	High	High	High	High	High	High	0.442	0.644	0.956	1.269	0.923	0.784	3.243	3.865	2.225	144900	210900	313200	415900	327700	302500	257000	1063000	1266000	729100	4	4	4	4	4	4
FALSE	High	[R].IIIHGFIDKGEENWLSDMCK.[N]	3xTMT6plex [N-Term; K9; K20]; 1xDeamidated [N13]; 1xCarbamidomethyl [C19]; 1xOxidation [M18]		FALSE	0.0067862	0	1	1	1	Q6P8U6	Q6P8U6 [89-108]	1	3109.63	High	High	High	High	High	High	High	High	High	High
FALSE	High	[K].LGCFSDDAPWSGTLDRPLK.[A]	2xTMT6plex [N-Term; K19]; 1xCarbamidomethyl [C3]		FALSE	3.69974e-05	0	1	1	6	Q6P8U6	Q6P8U6 [24-42]	0	2593.35	High	High	High	High	High	High	High	High	High	High	0.264	0.398	0.281	1.634	1.58	0.766	4.388	2.429	2.81	106200	160100	112800	656500	401800	635000	307600	1763000	976000	1129000	4	4	4	4	4	4
FALSE	High	[R].TTYTQATQNVR.[V]	1xTMT6plex [N-Term]		FALSE	0.000959991	0	1	1	3	Q6P8U6	Q6P8U6 [129-139]	0	1511.8	High	High	High	High	High	High	High	High	High	High	0.434	0.536	0.67	1.625	1.608	1.185	4.546	3.795	5.901	95780	118400	148000	358800	220800	355000	261700	1004000	837900	1303000	3	3	3	3	3	3
FALSE	High	[K].NILSQIVDIDGIWEGTR.[N]	1xTMT6plex [N-Term]		FALSE	1.47422e-06	0	1	1	12	Q6P8U6	Q6P8U6 [257-273]	0	2158.17	High	High	High	High	High	High	High	High	High	High	1.311	1.074	1.096	2.005	1.649	1.308	5.87	4.439	8.575	185400	151900	155100	283700	141400	233200	185000	830300	627800	1213000	10	10	10	10	10	10
FALSE	High	[R].NFAACNHLR.[S]	1xTMT6plex [N-Term]; 1xCarbamidomethyl [C5]		FALSE	0.00938717	0.00117917	2	3	5	Q6P8U6; Q4VBW7	Q6P8U6 [274-282]; Q4VBW7 [289-297]	0	1331.68	High	High	High	High	High	High	High	High	High	High	1.152	1.116	0.79	1.533	1.549	0.672	3.085	1.043	2.064	491200	476100	337100	654000	426600	660600	286800	1316000	444800	880600	1	1	1	1	1	1
FALSE	High	[R].IIIHGFIDK.[G]	2xTMT6plex [N-Term; K9]		FALSE	0.0116072	0.00117917	1	1	11	Q6P8U6	Q6P8U6 [89-97]	0	1513.95	High	High	High	High	High	High	High	High	High	High	0.178	0.42	0.209	0.623	1.333	0.609	7.51	6.777	6.426	246400	581800	289100	862900	1386000	1847000	843900	10410000	9393000	8906000	6	6	6	6	6	6
FALSE	High	[K].GEENWLSDMCK.[N]	2xTMT6plex [N-Term; K11]; 1xCarbamidomethyl [C10]; 1xOxidation [M9]		FALSE	0.0188859	0.00171593	1	1	5	Q6P8U6	Q6P8U6 [98-108]	0	1842.88	High	High	High	High	High	High	High	High	High	High	0.395	0.628	0.622	0.597	1.428	0.653	2.211	2.361	2.165	221400	351800	348200	334600	560100	799800	365600	1238000	1322000	1212000	3	3	3	3	3	3
High	Master Protein	Q00898	Alpha-1-antitrypsin 1-5 OS=Mus musculus GN=Serpina1e PE=1 SV=1	FALSE	0	69.7905	14.77	8	99	1	1	413	45.862	5.73	High	High	High	High	High	High	High	High	High	High		20704	ENSMUSG00000072849	Serpina1e	12	regulation of biological process;response to stimulus	endoplasmic reticulum;extracellular;Golgi	enzyme regulator activity;protein binding	Pf00079	0.78	1.504	0.617	1.106	1.653	1.684	4.522	3.58	2.214	996900	1923000	789300	1414000	1279000	2114000	2154000
Checked	Confidence	Annotated Sequence	Modifications	Modifications in Master Proteins	Contaminant	Qvality PEP	Qvality q-value	# Protein Groups	# Proteins	# PSMs	Master Protein Accessions	Positions in Master Proteins	# Missed Cleavages	Theo. MH+ [Da]	Found in Sample: [S1] F1: 126, Sample	Found in Sample: [S2] F1: 127N, Sample	Found in Sample: [S3] F1: 127C, Sample	Found in Sample: [S4] F1: 128N, Sample	Found in Sample: [S5] F1: 128C, Control	Found in Sample: [S6] F1: 129N, Sample	Found in Sample: [S7] F1: 129C, Sample	Found in Sample: [S8] F1: 130N, Sample	Found in Sample: [S9] F1: 130C, Sample	Found in Sample: [S10] F1: 131, Sample	Abundance Ratio: (F1, 126) / (F1, 128C)	Abundance Ratio: (F1, 127N) / (F1, 128C)	Abundance Ratio: (F1, 127C) / (F1, 128C)	Abundance Ratio: (F1, 128N) / (F1, 128C)	Abundance Ratio: (F1, 129N) / (F1, 128C)	Abundance Ratio: (F1, 129C) / (F1, 128C)	Abundance Ratio: (F1, 130N) / (F1, 128C)	Abundance Ratio: (F1, 130C) / (F1, 128C)	Abundance Ratio: (F1, 131) / (F1, 128C)	Abundance: F1: 126, Sample	Abundance: F1: 127N, Sample	Abundance: F1: 127C, Sample	Abundance: F1: 128N, Sample	Abundance: F1: 128C, Control	Abundance: F1: 129N, Sample	Abundance: F1: 129C, Sample	Abundance: F1: 130N, Sample	Abundance: F1: 130C, Sample	Abundance: F1: 131, Sample	Abundances Count: F1: 126, Sample	Abundances Count: F1: 127N, Sample	Abundances Count: F1: 127C, Sample	Abundances Count: F1: 128N, Sample	Abundances Count: F1: 128C, Control	Abundances Count: F1: 129N, Sample
FALSE	High	[K].NHYQAEVFSVNFAESEEAKK.[V]	3xTMT6plex [N-Term; K19; K20]; 1xDeamidated [N11]		FALSE	2.51778e-06	0	3	5	4	P07758; P22599; Q00898	P07758 [154-173]; P22599 [154-173]; Q00898 [154-173]	1	3015.57	High	High	High	High	High	High	High	High	High	High	0.368	0.81	0.496	3.357	1.278	3.516	1.073	2.711	1.684	52010	114500	70200	474600	141400	180600	497200	151700	383300	238100	2	2	2	2	2	2
FALSE	High	[K].NHYQAEVFSVNFAESEEAK.[K]	2xTMT6plex [N-Term; K19]		FALSE	6.73815e-06	0	3	5	8	P07758; P22599; Q00898	P07758 [154-172]; P22599 [154-172]; Q00898 [154-172]	0	2657.32	High	High	High	High	High	High	High	High	High	High	0.271	0.453	0.306	2.028	0.897	1.838	1.378	1.832	1.092	276700	463700	312800	2074000	1023000	916800	1880000	1409000	1873000	1117000	5	5	5	5	5	5
FALSE	High	[K].NHYQAEVFSVNFAESEEAK.[K]	2xTMT6plex [N-Term; K19]; 1xDeamidated [N11]		FALSE	0.000610418	0	3	5	3	P07758; P22599; Q00898	P07758 [154-172]; P22599 [154-172]; Q00898 [154-172]	0	2658.31	High	High	High	High	High	High	High	High	High	High
FALSE	High	[K].NHYQAEVFSVNFAESEEAKK.[V]	3xTMT6plex [N-Term; K19; K20]		FALSE	1.45325e-07	0	3	5	7	P07758; P22599; Q00898	P07758 [154-173]; P22599 [154-173]; Q00898 [154-173]	1	3014.58	High	High	High	High	High	High	High	High	High	High	0.254	0.579	0.63	6.127	1.718	5.86	1.374	4.908	1.869	107500	245400	266700	2596000	423700	727800	2483000	582200	2079000	791900	4	4	4	4	4	4
FALSE	High	[K].KVINDFVEK.[G]	3xTMT6plex [N-Term; K1; K9]; 1xDeamidated [N4]		FALSE	0.000772702	0	3	5	12	P07758; P22599; Q00898	P07758 [173-181]; P22599 [173-181]; Q00898 [173-181]	1	1780.08	High	High	High	High	High	High	High	High	High	High	0.213	0.296	0.296	0.991	1.394	1.752	1.692	1.217	1.091	709300	984000	985200	3298000	3330000	4642000	5832000	5635000	4053000	3631000	3	3	3	3	3	3
FALSE	High	[K].KVINDFVEK.[G]	3xTMT6plex [N-Term; K1; K9]		FALSE	0.00087426	0	3	5	17	P07758; P22599; Q00898	P07758 [173-181]; P22599 [173-181]; Q00898 [173-181]	1	1779.1	High	High	High	High	High	High	High	High	High	High	0.089	0.189	0.083	1.261	1.483	2.17	1.984	1.723	1.24	2861000	6078000	2669000	40430000	32080000	47580000	69610000	63630000	55260000	39770000	11	11	11	11	11	11
FALSE	High	[K].KPFDPENTK.[Q]	3xTMT6plex [N-Term; K1; K9]		FALSE	0.0321761	0.00171593	1	1	5	Q00898	Q00898 [214-222]	0	1763.03	High	High	High	High	High	High	High	High	High	High	0.78	1.504	0.617	1.106	1.653	1.684	4.522	3.58	2.214	996900	1923000	789300	1414000	1279000	2114000	2154000	5784000	4578000	2831000	2	2	2	2	2	2
FALSE	High	[K].LSQAVHK.[A]	2xTMT6plex [N-Term; K7]		FALSE	0.116301	0.00171593	2	3	5	P07758; Q00898	P07758 [348-354]; Q00898 [348-354]	0	1240.78	High	High	High	High	High	High	High	High	High	High	0.49	1.087	0.37	2.302	1.064	3.552	1.316	3.827	1.545	904500	2007000	682500	4251000	1847000	1964000	6560000	2430000	7067000	2854000	2	2	2	2	2	2
FALSE	High	[K].MQHLEQTLNK.[E]	2xTMT6plex [N-Term; K10]		FALSE	0.030332	0.00171593	2	3	1	P22599; Q00898	P22599 [278-287]; Q00898 [278-287]	0	1699.96	High	High	High	High	High	High	High	High	High	High
FALSE	High	[K].VINDFVEK.[G]	2xTMT6plex [N-Term; K8]; 1xDeamidated [N3]		FALSE	0.0402699	0.00171593	3	5	10	P07758; P22599; Q00898	P07758 [174-181]; P22599 [174-181]; Q00898 [174-181]	0	1422.82	High	High	High	High	High	High	High	High	High	High	0.25	0.443	0.316	0.726	1.701	1.422	2.345	1.553	1.455	1045000	1855000	1322000	3040000	4189000	7127000	5957000	9823000	6505000	6097000	8	8	8	8	8	8
FALSE	High	[K].VINDFVEK.[G]	2xTMT6plex [N-Term; K8]		FALSE	0.0306696	0.00171593	3	5	21	P07758; P22599; Q00898	P07758 [174-181]; P22599 [174-181]; Q00898 [174-181]	0	1421.84	High	High	High	High	High	High	High	High	High	High	0.156	0.231	0.141	0.708	1.733	1.67	2.36	1.711	1.426	2033000	3014000	1835000	9241000	13050000	22620000	21800000	30810000	22340000	18610000	12	12	12	12	12	12
FALSE	High	[K].VVDPTHK.[-]	2xTMT6plex [N-Term; K7]		FALSE	0.18195	0.00651022	3	4	6	P07758; P22599; Q00898	P07758 [407-413]; P22599 [407-413]; Q00898 [407-413]	0	1253.76	High	High	High	High	High	High	High	High	High	High	0.222	0.45	0.137	0.838	1.033	1.122	2.012	2.016	1.544	645300	1309000	398700	2440000	2910000	3006000	3265000	5855000	5867000	4492000	2	2	2	2	2	2
High	Master Protein	A9R9W0	Major urinary protein 17 OS=Mus musculus GN=Mup15 PE=2 SV=1	FALSE	0	69.0771	58.3333	11	92	3	1	180	20.634	5.19	High	High	High	High	High	High	High	High	High	High		100039150	ENSMUSG00000096674; ENSMUSG00000107311	Mup15	4; CHR_MG3562_PATCH	transport	extracellular	transporter activity	Pf00061	0.122	0.237	0.141	0.323	1.347	1.769	1.379	1.188	2.001	531300	1029000	613400	1403000	4344000	5851000	7683000
Checked	Confidence	Annotated Sequence	Modifications	Modifications in Master Proteins	Contaminant	Qvality PEP	Qvality q-value	# Protein Groups	# Proteins	# PSMs	Master Protein Accessions	Positions in Master Proteins	# Missed Cleavages	Theo. MH+ [Da]	Found in Sample: [S1] F1: 126, Sample	Found in Sample: [S2] F1: 127N, Sample	Found in Sample: [S3] F1: 127C, Sample	Found in Sample: [S4] F1: 128N, Sample	Found in Sample: [S5] F1: 128C, Control	Found in Sample: [S6] F1: 129N, Sample	Found in Sample: [S7] F1: 129C, Sample	Found in Sample: [S8] F1: 130N, Sample	Found in Sample: [S9] F1: 130C, Sample	Found in Sample: [S10] F1: 131, Sample	Abundance Ratio: (F1, 126) / (F1, 128C)	Abundance Ratio: (F1, 127N) / (F1, 128C)	Abundance Ratio: (F1, 127C) / (F1, 128C)	Abundance Ratio: (F1, 128N) / (F1, 128C)	Abundance Ratio: (F1, 129N) / (F1, 128C)	Abundance Ratio: (F1, 129C) / (F1, 128C)	Abundance Ratio: (F1, 130N) / (F1, 128C)	Abundance Ratio: (F1, 130C) / (F1, 128C)	Abundance Ratio: (F1, 131) / (F1, 128C)	Abundance: F1: 126, Sample	Abundance: F1: 127N, Sample	Abundance: F1: 127C, Sample	Abundance: F1: 128N, Sample	Abundance: F1: 128C, Control	Abundance: F1: 129N, Sample	Abundance: F1: 129C, Sample	Abundance: F1: 130N, Sample	Abundance: F1: 130C, Sample	Abundance: F1: 131, Sample	Abundances Count: F1: 126, Sample	Abundances Count: F1: 127N, Sample	Abundances Count: F1: 127C, Sample	Abundances Count: F1: 128N, Sample	Abundances Count: F1: 128C, Control	Abundances Count: F1: 129N, Sample
FALSE	High	[K].AGEYSVTYDGFNTFTIPK.[T]	2xTMT6plex [N-Term; K18]; 1xDeamidated [N12]		FALSE	0.00174686	0	3	21	1	A2AKN8; A2BIN1; A9R9W0	A2AKN8 [95-112]; A2BIN1 [95-112]; A9R9W0 [95-112]	0	2469.26	Not Found	High	High	High	High	High	High	High	High	High
FALSE	High	[K].AGEYSVTYDGFNTFTIPK.[T]	2xTMT6plex [N-Term; K18]		FALSE	0.000266955	0	3	21	5	A2AKN8; A2BIN1; A9R9W0	A2AKN8 [95-112]; A2BIN1 [95-112]; A9R9W0 [95-112]	0	2468.27	High	High	High	High	High	High	High	High	High	High	0.447	0.597	0.382	0.688	1.075	1.05	0.992	1.985	1.64	27160	36220	23160	41760	60710	65240	63740	60240	120500	99570	1	1	1	1	1	1
FALSE	High	[K].DGETFQLMGLYGR.[E]	1xTMT6plex [N-Term]		FALSE	0.000442444	0	3	23	6	A2AKN8; A2BIN1; A9R9W0	A2AKN8 [128-140]; A2BIN1 [128-140]; A9R9W0 [128-140]	0	1715.86	High	High	High	High	High	High	High	High	High	High	0.388	1.021	0.321	0.458	1.374	1.342	1.033	2.62	2.094	239600	630300	197900	282700	617000	847800	827800	637600	1617000	1292000	4	4	4	4	4	4
FALSE	High	[R].ENIIDLSNANR.[C]	1xTMT6plex [N-Term]		FALSE	0.00124277	0	3	19	15	A2AKN8; A2BIN1; A9R9W0	A2AKN8 [164-174]; A2BIN1 [164-174]; A9R9W0 [164-174]	0	1487.8	High	High	High	High	High	High	High	High	High	High	0.128	0.409	0.16	0.835	1.193	1.626	1.056	2.445	1.629	938100	3004000	1179000	6137000	7349000	8770000	11950000	7763000	17970000	11970000	8	8	8	8	8	8
FALSE	High	[R].ENIIDLSNANR.[C]	1xTMT6plex [N-Term]; 1xDeamidated [N8]		FALSE	0.00171448	0	3	19	2	A2AKN8; A2BIN1; A9R9W0	A2AKN8 [164-174]; A2BIN1 [164-174]; A9R9W0 [164-174]	0	1488.79	High	High	High	High	High	High	High	High	High	High
FALSE	High	[R].LFLEQIHVLENSLVLK.[VF]	2xTMT6plex [N-Term; K16]; 1xDeamidated [Q/N]		FALSE	0.000652951	0	1	16	3	A9R9W0	A9R9W0 [58-73]	0	2354.41	High	High	High	High	High	High	High	High	High	High
FALSE	High	[R].LFLEQIHVLENSLVLK.[VF]	2xTMT6plex [N-Term; K16]		FALSE	2.95554e-05	0	1	16	4	A9R9W0	A9R9W0 [58-73]	0	2353.43	High	High	High	High	High	High	High	High	High	High	0.266	1.231	0.495	1.783	1.001	2.331	0.868	5.613	1.397	5312	24540	9875	35560	19940	19950	46480	17300	111900	27850	2	2	2	2	2	2
FALSE	High	[K].INGEWHTIILASDK.[R]	2xTMT6plex [N-Term; K14]; 1xDeamidated [N2]		FALSE	0.0104581	0.00117917	3	22	3	A2AKN8; A2BIN1; A9R9W0	A2AKN8 [33-46]; A2BIN1 [33-46]; A9R9W0 [33-46]	0	2056.15	High	High	High	High	High	High	High	High	High	High	1.366	2.742	1.419	3.65	1.197	1.148	0.797	1.164	1.047	163700	328700	170100	437600	119900	143500	137600	95600	139500	125500	2	2	2	2	2	2
FALSE	High	[K].DGETFQLMGLYGR.[E]	1xTMT6plex [N-Term]; 1xOxidation [M8]		FALSE	0.0118693	0.00117917	3	23	11	A2AKN8; A2BIN1; A9R9W0	A2AKN8 [128-140]; A2BIN1 [128-140]; A9R9W0 [128-140]	0	1731.86	High	High	High	High	High	High	High	High	High	High	0.406	0.849	0.361	0.519	1.32	0.918	1.004	1.66	1.561	725900	1516000	644500	927300	1787000	2358000	1640000	1794000	2965000	2789000	11	11	11	11	11	11
FALSE	High	[K].INGEWHTIILASDKR.[E]	2xTMT6plex [N-Term; K14]		FALSE	0.0096712	0.00117917	3	22	5	A2AKN8; A2BIN1; A9R9W0	A2AKN8 [33-47]; A2BIN1 [33-47]; A9R9W0 [33-47]	1	2211.27	High	High	High	High	High	High	High	High	High	High	0.262	0.513	0.292	0.699	1.213	0.708	1.299	1.178	1.31	95780	187600	106600	255300	365500	443200	258600	474600	430500	478900	2	2	2	2	2	2
FALSE	High	[R].EPDLSSDIK.[E]	2xTMT6plex [N-Term; K9]		FALSE	0.0137734	0.00117917	4	26	10	A2AKN8; Q5FW60; A2BIN1; A9R9W0	A2AKN8 [141-149]; Q5FW60 [142-150]; A2BIN1 [141-149]; A9R9W0 [141-149]	0	1461.82	High	High	High	High	High	High	High	High	High	High	0.254	0.444	0.26	0.495	1.397	1.606	1.001	2.236	2.236	855600	1494000	873200	1666000	3365000	4701000	5405000	3368000	7524000	7522000	8	8	8	8	8	8
FALSE	High	[K].IEDNGNFR.[L]	1xTMT6plex [N-Term]; 1xDeamidated [N4]		FALSE	0.0867589	0.00171593	3	19	3	A2AKN8; A2BIN1; A9R9W0	A2AKN8 [50-57]; A2BIN1 [50-57]; A9R9W0 [50-57]	0	1194.6	High	High	High	High	High	High	High	High	High	High	0.132	0.223	0.11	0.249	1.518	0.845	1.375	1.226	1.783	359500	607500	299900	679000	2723000	4133000	2302000	3745000	3338000	4856000	2	2	2	2	2	2
FALSE	High	[R].EKIEDNGNFR.[L]	2xTMT6plex [N-Term; K2]; 1xDeamidated [N6]		FALSE	0.0880029	0.00171593	3	19	11	A2AKN8; A2BIN1; A9R9W0	A2AKN8 [48-57]; A2BIN1 [48-57]; A9R9W0 [48-57]	1	1680.9	High	High	High	High	High	High	High	High	High	High	0.2	0.442	0.164	0.388	1.297	0.668	1.157	1.199	1.464	411800	908300	338100	797700	2057000	2668000	1375000	2381000	2466000	3012000	3	3	3	3	3	3
FALSE	High	[R].EKIEDNGNFR.[L]	2xTMT6plex [N-Term; K2]		FALSE	0.102123	0.00171593	3	19	2	A2AKN8; A2BIN1; A9R9W0	A2AKN8 [48-57]; A2BIN1 [48-57]; A9R9W0 [48-57]	1	1679.91	High	High	High	High	High	High	High	High	High	High	0.05	0.168	0.062	0.26	1.314	0.697	1.264	1.19	1.571	76700	255700	95060	395900	1521000	1998000	1061000	1922000	1810000	2390000	1	1	1	1	1	1
FALSE	High	[R].NFNVQKINGEWHTIILASDKR.[E]	3xTMT6plex [N-Term; K6; K20]		FALSE	0.0190265	0.00171593	1	2	4	A9R9W0	A9R9W0 [27-47]	2	3170.8	High	High	High	High	High	High	High	High	High	High	0.037	0.101	0.063	0.225	1.39	0.513	0.661	0.846	1.753	9152	24940	15510	55470	246600	342800	126500	163000	208500	432200	1	1	1	1	1	1
FALSE	High	[R].FAQLCEK.[H]	2xTMT6plex [N-Term; K7]; 1xCarbamidomethyl [C5]		FALSE	0.18195	0.00651022	1	8	7	A9R9W0	A9R9W0 [152-158]	0	1353.76	High	High	High	High	High	High	High	High	High	High	0.127	0.24	0.144	0.322	1.346	1.842	1.424	1.187	2.019	516800	979300	588000	1312000	4077000	5488000	7510000	5808000	4838000	8233000	4	4	4	4	4	4
High	Master Protein	A2BIN1	Major urinary protein 8 OS=Mus musculus GN=Mup10 PE=2 SV=1	FALSE	0	67.9206	55	10	99	1	1	180	20.668	5.02	High	High	High	High	High	High	High	High	High	High		100039008	ENSMUSG00000078680	Mup10	4	transport	extracellular	transporter activity	Pf00061	0.136	0.314	0.377	1.939	0.794	4.374	0.528	2.111	1.11	132100	304700	366100	1882000	970900	770800	4247000
Checked	Confidence	Annotated Sequence	Modifications	Modifications in Master Proteins	Contaminant	Qvality PEP	Qvality q-value	# Protein Groups	# Proteins	# PSMs	Master Protein Accessions	Positions in Master Proteins	# Missed Cleavages	Theo. MH+ [Da]	Found in Sample: [S1] F1: 126, Sample	Found in Sample: [S2] F1: 127N, Sample	Found in Sample: [S3] F1: 127C, Sample	Found in Sample: [S4] F1: 128N, Sample	Found in Sample: [S5] F1: 128C, Control	Found in Sample: [S6] F1: 129N, Sample	Found in Sample: [S7] F1: 129C, Sample	Found in Sample: [S8] F1: 130N, Sample	Found in Sample: [S9] F1: 130C, Sample	Found in Sample: [S10] F1: 131, Sample	Abundance Ratio: (F1, 126) / (F1, 128C)	Abundance Ratio: (F1, 127N) / (F1, 128C)	Abundance Ratio: (F1, 127C) / (F1, 128C)	Abundance Ratio: (F1, 128N) / (F1, 128C)	Abundance Ratio: (F1, 129N) / (F1, 128C)	Abundance Ratio: (F1, 129C) / (F1, 128C)	Abundance Ratio: (F1, 130N) / (F1, 128C)	Abundance Ratio: (F1, 130C) / (F1, 128C)	Abundance Ratio: (F1, 131) / (F1, 128C)	Abundance: F1: 126, Sample	Abundance: F1: 127N, Sample	Abundance: F1: 127C, Sample	Abundance: F1: 128N, Sample	Abundance: F1: 128C, Control	Abundance: F1: 129N, Sample	Abundance: F1: 129C, Sample	Abundance: F1: 130N, Sample	Abundance: F1: 130C, Sample	Abundance: F1: 131, Sample	Abundances Count: F1: 126, Sample	Abundances Count: F1: 127N, Sample	Abundances Count: F1: 127C, Sample	Abundances Count: F1: 128N, Sample	Abundances Count: F1: 128C, Control	Abundances Count: F1: 129N, Sample
FALSE	High	[K].AGEYSVTYDGFNTFTIPK.[T]	2xTMT6plex [N-Term; K18]; 1xDeamidated [N12]		FALSE	0.00174686	0	3	21	1	A2AKN8; A2BIN1; A9R9W0	A2AKN8 [95-112]; A2BIN1 [95-112]; A9R9W0 [95-112]	0	2469.26	Not Found	High	High	High	High	High	High	High	High	High
FALSE	High	[K].AGEYSVTYDGFNTFTIPK.[T]	2xTMT6plex [N-Term; K18]		FALSE	0.000266955	0	3	21	5	A2AKN8; A2BIN1; A9R9W0	A2AKN8 [95-112]; A2BIN1 [95-112]; A9R9W0 [95-112]	0	2468.27	High	High	High	High	High	High	High	High	High	High	0.447	0.597	0.382	0.688	1.075	1.05	0.992	1.985	1.64	27160	36220	23160	41760	60710	65240	63740	60240	120500	99570	1	1	1	1	1	1
FALSE	High	[R].LFLEQIHVLEK.[S]	2xTMT6plex [N-Term; K11]		FALSE	0.000506252	0	1	2	7	A2BIN1	A2BIN1 [58-68]	0	1827.11	High	High	High	High	High	High	High	High	High	High	0.136	0.314	0.377	1.939	0.794	4.374	0.528	2.111	1.11	132100	304700	366100	1882000	970900	770800	4247000	512700	2049000	1077000	2	2	2	2	2	2
FALSE	High	[K].DGETFQLMGLYGR.[E]	1xTMT6plex [N-Term]		FALSE	0.000442444	0	3	23	6	A2AKN8; A2BIN1; A9R9W0	A2AKN8 [128-140]; A2BIN1 [128-140]; A9R9W0 [128-140]	0	1715.86	High	High	High	High	High	High	High	High	High	High	0.388	1.021	0.321	0.458	1.374	1.342	1.033	2.62	2.094	239600	630300	197900	282700	617000	847800	827800	637600	1617000	1292000	4	4	4	4	4	4
FALSE	High	[R].FAQLCEEHGILR.[E]	1xTMT6plex [N-Term]; 1xCarbamidomethyl [C5]		FALSE	0.000235939	0	2	15	18	A2AKN8; A2BIN1	A2AKN8 [152-163]; A2BIN1 [152-163]	0	1701.89	High	High	High	High	High	High	High	High	High	High	0.188	0.327	0.3	0.381	1.174	0.86	1.051	1.258	1.305	1099000	1911000	1749000	2226000	5836000	6851000	5020000	6133000	7342000	7615000	16	16	16	16	16	16
FALSE	High	[R].ENIIDLSNANR.[C]	1xTMT6plex [N-Term]		FALSE	0.00124277	0	3	19	15	A2AKN8; A2BIN1; A9R9W0	A2AKN8 [164-174]; A2BIN1 [164-174]; A9R9W0 [164-174]	0	1487.8	High	High	High	High	High	High	High	High	High	High	0.128	0.409	0.16	0.835	1.193	1.626	1.056	2.445	1.629	938100	3004000	1179000	6137000	7349000	8770000	11950000	7763000	17970000	11970000	8	8	8	8	8	8
FALSE	High	[R].ENIIDLSNANR.[C]	1xTMT6plex [N-Term]; 1xDeamidated [N8]		FALSE	0.00171448	0	3	19	2	A2AKN8; A2BIN1; A9R9W0	A2AKN8 [164-174]; A2BIN1 [164-174]; A9R9W0 [164-174]	0	1488.79	High	High	High	High	High	High	High	High	High	High
FALSE	High	[K].INGEWHTIILASDK.[R]	2xTMT6plex [N-Term; K14]; 1xDeamidated [N2]		FALSE	0.0104581	0.00117917	3	22	3	A2AKN8; A2BIN1; A9R9W0	A2AKN8 [33-46]; A2BIN1 [33-46]; A9R9W0 [33-46]	0	2056.15	High	High	High	High	High	High	High	High	High	High	1.366	2.742	1.419	3.65	1.197	1.148	0.797	1.164	1.047	163700	328700	170100	437600	119900	143500	137600	95600	139500	125500	2	2	2	2	2	2
FALSE	High	[K].DGETFQLMGLYGR.[E]	1xTMT6plex [N-Term]; 1xOxidation [M8]		FALSE	0.0118693	0.00117917	3	23	11	A2AKN8; A2BIN1; A9R9W0	A2AKN8 [128-140]; A2BIN1 [128-140]; A9R9W0 [128-140]	0	1731.86	High	High	High	High	High	High	High	High	High	High	0.406	0.849	0.361	0.519	1.32	0.918	1.004	1.66	1.561	725900	1516000	644500	927300	1787000	2358000	1640000	1794000	2965000	2789000	11	11	11	11	11	11
FALSE	High	[K].INGEWHTIILASDKR.[E]	2xTMT6plex [N-Term; K14]		FALSE	0.0096712	0.00117917	3	22	5	A2AKN8; A2BIN1; A9R9W0	A2AKN8 [33-47]; A2BIN1 [33-47]; A9R9W0 [33-47]	1	2211.27	High	High	High	High	High	High	High	High	High	High	0.262	0.513	0.292	0.699	1.213	0.708	1.299	1.178	1.31	95780	187600	106600	255300	365500	443200	258600	474600	430500	478900	2	2	2	2	2	2
FALSE	High	[R].EPDLSSDIK.[E]	2xTMT6plex [N-Term; K9]		FALSE	0.0137734	0.00117917	4	26	10	A2AKN8; Q5FW60; A2BIN1; A9R9W0	A2AKN8 [141-149]; Q5FW60 [142-150]; A2BIN1 [141-149]; A9R9W0 [141-149]	0	1461.82	High	High	High	High	High	High	High	High	High	High	0.254	0.444	0.26	0.495	1.397	1.606	1.001	2.236	2.236	855600	1494000	873200	1666000	3365000	4701000	5405000	3368000	7524000	7522000	8	8	8	8	8	8
FALSE	High	[K].IEDNGNFR.[L]	1xTMT6plex [N-Term]; 1xDeamidated [N4]		FALSE	0.0867589	0.00171593	3	19	3	A2AKN8; A2BIN1; A9R9W0	A2AKN8 [50-57]; A2BIN1 [50-57]; A9R9W0 [50-57]	0	1194.6	High	High	High	High	High	High	High	High	High	High	0.132	0.223	0.11	0.249	1.518	0.845	1.375	1.226	1.783	359500	607500	299900	679000	2723000	4133000	2302000	3745000	3338000	4856000	2	2	2	2	2	2
FALSE	High	[R].EKIEDNGNFR.[L]	2xTMT6plex [N-Term; K2]; 1xDeamidated [N6]		FALSE	0.0880029	0.00171593	3	19	11	A2AKN8; A2BIN1; A9R9W0	A2AKN8 [48-57]; A2BIN1 [48-57]; A9R9W0 [48-57]	1	1680.9	High	High	High	High	High	High	High	High	High	High	0.2	0.442	0.164	0.388	1.297	0.668	1.157	1.199	1.464	411800	908300	338100	797700	2057000	2668000	1375000	2381000	2466000	3012000	3	3	3	3	3	3
FALSE	High	[R].EKIEDNGNFR.[L]	2xTMT6plex [N-Term; K2]		FALSE	0.102123	0.00171593	3	19	2	A2AKN8; A2BIN1; A9R9W0	A2AKN8 [48-57]; A2BIN1 [48-57]; A9R9W0 [48-57]	1	1679.91	High	High	High	High	High	High	High	High	High	High	0.05	0.168	0.062	0.26	1.314	0.697	1.264	1.19	1.571	76700	255700	95060	395900	1521000	1998000	1061000	1922000	1810000	2390000	1	1	1	1	1	1
High	Master Protein	Q7M758	N-acetylated-alpha-linked acidic dipeptidase-like protein OS=Mus musculus GN=Naaladl1 PE=2 SV=1	FALSE	0	66.8669	18.9262	11	47	11	1	745	80.463	5.5	High	High	High	High	High	High	High	High	High	High		381204	ENSMUSG00000054999	Naaladl1	19	metabolic process	membrane	catalytic activity;metal ion binding	Pf02225, Pf04253, Pf04389	0.561	0.827	0.798	1.127	1.58	1.116	1.499	2.713	1.606	3165000	4664000	4505000	6360000	5643000	8915000	6295000
Checked	Confidence	Annotated Sequence	Modifications	Modifications in Master Proteins	Contaminant	Qvality PEP	Qvality q-value	# Protein Groups	# Proteins	# PSMs	Master Protein Accessions	Positions in Master Proteins	# Missed Cleavages	Theo. MH+ [Da]	Found in Sample: [S1] F1: 126, Sample	Found in Sample: [S2] F1: 127N, Sample	Found in Sample: [S3] F1: 127C, Sample	Found in Sample: [S4] F1: 128N, Sample	Found in Sample: [S5] F1: 128C, Control	Found in Sample: [S6] F1: 129N, Sample	Found in Sample: [S7] F1: 129C, Sample	Found in Sample: [S8] F1: 130N, Sample	Found in Sample: [S9] F1: 130C, Sample	Found in Sample: [S10] F1: 131, Sample	Abundance Ratio: (F1, 126) / (F1, 128C)	Abundance Ratio: (F1, 127N) / (F1, 128C)	Abundance Ratio: (F1, 127C) / (F1, 128C)	Abundance Ratio: (F1, 128N) / (F1, 128C)	Abundance Ratio: (F1, 129N) / (F1, 128C)	Abundance Ratio: (F1, 129C) / (F1, 128C)	Abundance Ratio: (F1, 130N) / (F1, 128C)	Abundance Ratio: (F1, 130C) / (F1, 128C)	Abundance Ratio: (F1, 131) / (F1, 128C)	Abundance: F1: 126, Sample	Abundance: F1: 127N, Sample	Abundance: F1: 127C, Sample	Abundance: F1: 128N, Sample	Abundance: F1: 128C, Control	Abundance: F1: 129N, Sample	Abundance: F1: 129C, Sample	Abundance: F1: 130N, Sample	Abundance: F1: 130C, Sample	Abundance: F1: 131, Sample	Abundances Count: F1: 126, Sample	Abundances Count: F1: 127N, Sample	Abundances Count: F1: 127C, Sample	Abundances Count: F1: 128N, Sample	Abundances Count: F1: 128C, Control	Abundances Count: F1: 129N, Sample
FALSE	High	[K].EISAPGSSGLSIYDNWIR.[Y]	1xTMT6plex [N-Term]; 1xDeamidated [N15]		FALSE	0.00475937	0	1	1	1	Q7M758	Q7M758 [477-494]	0	2195.12	High	High	High	High	High	High	High	High	High	High
FALSE	High	[K].EISAPGSSGLSIYDNWIR.[Y]	1xTMT6plex [N-Term]		FALSE	1.41567e-07	0	1	1	9	Q7M758	Q7M758 [477-494]	0	2194.13	High	High	High	High	High	High	High	High	High	High	0.287	0.363	0.744	0.981	1.273	0.88	1.767	3.178	1.53	156700	198300	406400	535600	546200	695300	480900	965400	1736000	835700	6	6	6	6	6	6
FALSE	High	[R].TSSNVLGIIQGAVEPDR.[Y]	1xTMT6plex [N-Term]		FALSE	1.54195e-06	0	1	1	7	Q7M758	Q7M758 [350-366]	0	1985.09	High	High	High	High	High	High	High	High	High	High	0.389	0.647	0.623	0.552	1.641	0.794	1.151	2.797	1.517	143900	239200	230300	204300	369800	606900	293500	425800	1035000	561100	5	5	5	5	5	5
FALSE	High	[K].FLDPGFSSHQAVAR.[T]	1xTMT6plex [N-Term]		FALSE	0.000392508	0	1	1	3	Q7M758	Q7M758 [562-575]	0	1760.93	High	High	High	High	High	High	High	High	High	High	0.259	0.696	0.554	0.933	1.274	1.251	1.268	2.604	1.86	175600	471100	374900	631700	676800	862600	846700	858100	1762000	1259000	2	2	2	2	2	2
FALSE	High	[R].IYPTYHTAFDTFDYVEK.[F]	2xTMT6plex [N-Term; K17]		FALSE	0.000194213	0	1	1	5	Q7M758	Q7M758 [545-561]	0	2568.31	High	High	High	High	High	High	High	High	High	High	0.379	0.658	0.855	1.746	1.491	1.397	1.086	5.483	1.675	212300	368600	478700	977700	560100	834800	782700	608100	3071000	938200	4	4	4	4	4	4
FALSE	High	[R].DSWVHGAVDPSSGTAVLLEISR.[V]	1xTMT6plex [N-Term]		FALSE	1.11267e-05	0	1	1	1	Q7M758	Q7M758 [375-396]	0	2525.32	High	High	High	High	High	High	High	High	High	High	1.169	1.611	1.261	1.079	1.431	1.367	1.212	2.269	1.728	31130	42890	33560	28730	26620	38090	36400	32260	60390	46000	1	1	1	1	1	1
FALSE	High	[K].AAAASLGEHILTLQK.[S]	2xTMT6plex [N-Term; K15]		FALSE	0.000345611	0	1	1	3	Q7M758	Q7M758 [635-649]	0	1981.18	High	High	High	High	High	High	High	High	High	High	2.333	2.585	2.414	1.42	1.277	0.983	2.225	1.076	1.588	862100	955300	892100	524700	369600	472000	363300	822200	397500	586800	2	2	2	2	2	2
FALSE	High	[K].DTATGLDSAK.[T]	2xTMT6plex [N-Term; K10]		FALSE	0.00380322	0	1	1	3	Q7M758	Q7M758 [94-103]	0	1436.8	High	High	High	High	High	High	High	High	High	High	0.227	0.427	0.384	1.064	2.445	1.102	1.605	4.541	2.416	63510	119300	107300	297100	279300	682800	307700	448200	1268000	674700	1	1	1	1	1	1
FALSE	High	[R].DEALVQLLLGR.[W]	1xTMT6plex [N-Term]		FALSE	0.00479507	0	1	1	4	Q7M758	Q7M758 [81-91]	0	1455.87	High	High	High	High	High	High	High	High	High	High	0.691	1.181	2.695	9.127	1.508	3.534	0.519	3.119	0.936	61750	105500	240800	815400	89340	134800	315700	46350	278700	83620	2	2	2	2	2	2
FALSE	High	[R].WKDTATGLDSAK.[T]	3xTMT6plex [N-Term; K2; K12]		FALSE	0.000310065	0	1	1	3	Q7M758	Q7M758 [92-103]	1	1980.14	High	High	High	High	High	High	High	High	High	High	0.556	1.293	1.136	3.192	1.601	1.135	0.995	4.139	1.582	213100	495600	435300	1223000	383200	613400	434700	381100	1586000	606000	1	1	1	1	1	1
FALSE	High	[K].AAAASLGEHILTLQK.[S]	2xTMT6plex [N-Term; K15]; 1xDeamidated [Q14]		FALSE	0.0135701	0.00117917	1	1	1	Q7M758	Q7M758 [635-649]	0	1982.17	High	High	High	High	High	High	High	High	High	High
FALSE	High	[R].YVIYGNHR.[D]	1xTMT6plex [N-Term]		FALSE	0.0975391	0.00171593	1	1	5	Q7M758	Q7M758 [367-374]	0	1250.68	High	High	High	High	High	High	High	High	High	High	0.515	0.723	0.467	0.496	1.5	0.862	1.492	1.599	1.357	854100	1198000	773900	822600	1657000	2486000	1429000	2472000	2650000	2248000	4	4	4	4	4	4
FALSE	High	[R].VLGTLLK.[K]	2xTMT6plex [N-Term; K7]		FALSE	0.190752	0.00804114	1	1	2	Q7M758	Q7M758 [397-403]	0	1201.83	High	High	High	High	High	High	High	High	High	High	0.57	0.687	0.776	0.437	2.174	1.467	2.042	2.142	1.783	390300	470300	531500	299300	684700	1488000	1004000	1398000	1466000	1221000	2	2	2	2	2	2
High	Master Protein	1903220	gnl|PID|e255346 *CON* keratin (X99142) type II intermediate filament of hair [Homo sapiens]	TRUE	0	66.2656	36.0248	15	51	2	1	483	53.159	5.57	High	High	High	High	High	High	High	High	High	High		3892		KRT86	12	transport		catalytic activity;motor activity;protein binding;structural molecule activity	Pf00038, Pf01576, Pf05557, Pf07888, Pf07926, Pf09726, Pf11559, Pf12128, Pf13166	1.999	2.089	1.365	2.266	1.259	0.72	1.065	0.953	1.305	357300	373300	244000	405000	178700	225000	128800
Checked	Confidence	Annotated Sequence	Modifications	Modifications in Master Proteins	Contaminant	Qvality PEP	Qvality q-value	# Protein Groups	# Proteins	# PSMs	Master Protein Accessions	Positions in Master Proteins	# Missed Cleavages	Theo. MH+ [Da]	Found in Sample: [S1] F1: 126, Sample	Found in Sample: [S2] F1: 127N, Sample	Found in Sample: [S3] F1: 127C, Sample	Found in Sample: [S4] F1: 128N, Sample	Found in Sample: [S5] F1: 128C, Control	Found in Sample: [S6] F1: 129N, Sample	Found in Sample: [S7] F1: 129C, Sample	Found in Sample: [S8] F1: 130N, Sample	Found in Sample: [S9] F1: 130C, Sample	Found in Sample: [S10] F1: 131, Sample	Abundance Ratio: (F1, 126) / (F1, 128C)	Abundance Ratio: (F1, 127N) / (F1, 128C)	Abundance Ratio: (F1, 127C) / (F1, 128C)	Abundance Ratio: (F1, 128N) / (F1, 128C)	Abundance Ratio: (F1, 129N) / (F1, 128C)	Abundance Ratio: (F1, 129C) / (F1, 128C)	Abundance Ratio: (F1, 130N) / (F1, 128C)	Abundance Ratio: (F1, 130C) / (F1, 128C)	Abundance Ratio: (F1, 131) / (F1, 128C)	Abundance: F1: 126, Sample	Abundance: F1: 127N, Sample	Abundance: F1: 127C, Sample	Abundance: F1: 128N, Sample	Abundance: F1: 128C, Control	Abundance: F1: 129N, Sample	Abundance: F1: 129C, Sample	Abundance: F1: 130N, Sample	Abundance: F1: 130C, Sample	Abundance: F1: 131, Sample	Abundances Count: F1: 126, Sample	Abundances Count: F1: 127N, Sample	Abundances Count: F1: 127C, Sample	Abundances Count: F1: 128N, Sample	Abundances Count: F1: 128C, Control	Abundances Count: F1: 129N, Sample
FALSE	High	[R].ATAENEFVALK.[K]	2xTMT6plex [N-Term; K11]		TRUE	0.000775599	0	2	12	1	2190400; 1903220	2190400 [202-212]; 1903220 [199-209]	0	1650.95	High	High	High	High	High	High	High	High	High	High	0.639	1.473	2.159	7.276	2.09	0.776	2.633	1.482	2.074	96450	222200	325700	1098000	150800	315300	117100	397100	223500	312800	1	1	1	1	1	1
FALSE	High	[K].LEAAVAQSEQQGEAALSDAR.[C]	1xTMT6plex [N-Term]		TRUE	0.000162277	0	2	6	1	2190400; 1903220	2190400 [346-365]; 1903220 [343-362]	0	2273.16	High	High	High	High	High	High	High	High	High	High
FALSE	High	[K].LAELEGALQK.[A]	2xTMT6plex [N-Term; K10]		TRUE	0.00363635	0	3	12	5	1903218; 2190400; 1903220	1903218 [385-394]; 2190400 [368-377]; 1903220 [365-374]	0	1529.93	High	High	High	High	High	High	High	High	High	High	0.49	0.697	0.653	5.896	1.631	0.689	1.784	1.064	2.272	202500	287700	269800	2436000	413000	673600	284700	736900	439600	938600	4	4	4	4	4	4
FALSE	High	[K].SDLEANVEALIQEIDFLR.[R]	1xTMT6plex [N-Term]		TRUE	1.02856e-05	0	2	5	4	2190400; 1903220	2190400 [223-240]; 1903220 [220-237]	0	2304.23	High	High	High	High	High	High	High	High	High	High	0.972	1.663	1.76	4.107	1.629	1.327	0.901	1.152	1.845	22050	37740	39950	93200	22690	36970	30120	20440	26150	41860	2	2	2	2	2	2
FALSE	High	[R].KSDLEANVEALIQEIDFLR.[R]	2xTMT6plex [N-Term; K1]; 1xDeamidated [Q/N]		TRUE	0.00520585	0	2	5	2	2190400; 1903220	2190400 [222-240]; 1903220 [219-237]	1	2662.47	High	High	High	High	High	High	High	High	High	High	0.352	0.371	0.343	2.167	1.603	1.341	3.411	3.981	3.405	2616	2763	2554	16120	7438	11920	9972	25370	29610	25330	1	1	1	1	1	1
FALSE	High	[R].KSDLEANVEALIQEIDFLR.[R]	2xTMT6plex [N-Term; K1]		TRUE	1.37817e-06	0	2	5	9	2190400; 1903220	2190400 [222-240]; 1903220 [219-237]	1	2661.49	High	High	High	High	High	High	High	High	High	High	0.562	1.055	0.877	7.352	1.697	1.048	2.141	2.532	3.809	48150	90350	75080	629600	85640	145300	89710	183300	216800	326200	7	7	7	7	7	7
FALSE	High	[R].LASELNHVQEVLEGYK.[K]	2xTMT6plex [N-Term; K16]		TRUE	0.000603604	0	3	7	2	1903218; 2190400; 1903220	1903218 [193-208]; 2190400 [176-191]; 1903220 [173-188]	0	2287.27	High	High	High	High	High	High	High	High	High	High	1.235	3.601	0.71	4.976	1.136	0.398	0.66	0.699	1.106	69880	203800	40150	281600	56590	64270	22500	37350	39530	62570	1	1	1	1	1	1
FALSE	High	[R].GLTGGFGSHSVCGGFR.[A]	1xTMT6plex [N-Term]; 1xCarbamidomethyl [C12]		TRUE	0.000285558	0	2	4	3	2190400; 1903220	2190400 [40-55]; 1903220 [37-52]	0	1824.9	High	High	High	High	High	High	High	High	High	High	0.895	1.476	0.87	2.969	1.187	0.661	0.982	1.13	1.072	188000	309900	182700	623400	209900	249100	138800	206100	237300	225000	1	1	1	1	1	1
FALSE	High	[R].VLQSHISDTSVVVK.[L]	2xTMT6plex [N-Term; K14]		TRUE	0.00331181	0	1	1	1	1903220	1903220 [246-259]	0	1970.17	High	High	High	High	High	High	High	High	High	High	0.853	1.109	0.776	3.109	1.351	0.647	0.994	0.984	1.201	93060	121100	84690	339300	109100	147400	70590	108500	107400	131000	1	1	1	1	1	1
FALSE	High	[R].VSSVPSNSNVVVGTTNACAPSAR.[V]	1xTMT6plex [N-Term]; 1xCarbamidomethyl [C18]		TRUE	0.0042229	0	1	1	1	1903220	1903220 [450-472]	0	2503.28	High	High	High	High	High	High	High	High	High	High	3.797	3.624	2.289	0.943	1.114	0.836	1.177	0.905	1.469	264200	252200	159300	65650	69590	77540	58180	81940	63010	102200	1	1	1	1	1	1
FALSE	High	[R].DLNMDCIIAEIK.[A]	2xTMT6plex [N-Term; K12]; 1xCarbamidomethyl [C6]		TRUE	0.00884376	0	3	5	3	1903218; 2190400; 1903220	1903218 [285-296]; 2190400 [268-279]; 1903220 [265-276]	0	1893.02	High	High	High	High	High	High	High	High	High	High
FALSE	High	[R].VSSVPSNSNVVVGTTNACAPSAR.[V]	1xTMT6plex [N-Term]; 1xDeamidated [N9]; 1xCarbamidomethyl [C18]		TRUE	0.0483553	0.00171593	1	1	1	1903220	1903220 [450-472]	0	2504.26	High	High	High	High	High	High	High	High	High	High
FALSE	High	[R].TKEEINELNR.[MVL]	2xTMT6plex [N-Term; K2]		TRUE	0.126021	0.00171593	3	14	3	1903218; 2190400; 1903220	1903218 [335-344]; 2190400 [318-327]; 1903220 [315-324]	1	1703.97	High	High	High	High	High	High	High	High	High	High	1.322	2.397	1.945	12.343	2.011	1.202	1.303	1.727	1.25	360100	653000	529800	3363000	272400	547800	327500	355100	470500	340500	1	1	1	1	1	1
FALSE	High	[R].ATAENEFVALKK.[D]	3xTMT6plex [N-Term; K11; K12]		TRUE	0.0289104	0.00171593	2	12	1	2190400; 1903220	2190400 [202-213]; 1903220 [199-210]	1	2008.2	High	High	High	High	High	High	High	High	High	High
FALSE	High	[R].AEAESWYR.[ST]	1xTMT6plex [N-Term]		TRUE	0.157183	0.00250807	3	20	2	1903218; 2190400; 1903220	1903218 [308-315]; 2190400 [291-298]; 1903220 [288-295]	0	1240.62	High	High	High	High	High	High	High	High	High	High	0.79	1.059	0.813	7.316	2.622	0.73	1.12	1.473	2.196	321300	430400	330300	2974000	406500	1066000	296700	455100	598700	892600	1	1	1	1	1	1
FALSE	High	[RK].FAAFIDK.[VE]	2xTMT6plex [N-Term; K7]		TRUE	0.16829	0.0041472	3	18	7	1903218; 2190400; 1903220	1903218 [134-140]; 2190400 [117-123]; 1903220 [114-120]	0	1269.76	High	High	High	High	High	High	High	High	High	High	4.984	7.821	13.508	100	40.783	11.149	15.573	10.851	20.266	450100	706400	1220000	36160000	90320	3683000	1007000	1406000	980100	1830000	5	5	5	5	1	5
FALSE	High	[R].FLEQQNK.[LAVIM]	2xTMT6plex [N-Term; K7]		TRUE	0.186933	0.00804114	6	62	5	125105; 1346344; 88052; 1903218; 2190400; 1903220	125105 [188-194]; 1346344 [183-189]; 88052 [187-193]; 1903218 [143-149]; 2190400 [126-132]; 1903220 [123-129]	0	1364.79	High	High	High	High	High	High	High	High	High	High
High	Master Protein	E9Q7P9	Protein Cdhr2 OS=Mus musculus GN=Cdhr2 PE=2 SV=1	FALSE	0	64.2568	11.6972	14	99	14	1	1308	142.545	4.44	High	High	High	High	High	High	High	High	High	High		268663	ENSMUSG00000034918	Cdhr2	13	regulation of biological process	membrane	metal ion binding	Pf00028	0.416	0.693	0.562	1.167	1.65	1.489	1.818	3.09	2.611	7720000	12850000	10420000	21630000	18540000	30590000	27600000
Checked	Confidence	Annotated Sequence	Modifications	Modifications in Master Proteins	Contaminant	Qvality PEP	Qvality q-value	# Protein Groups	# Proteins	# PSMs	Master Protein Accessions	Positions in Master Proteins	# Missed Cleavages	Theo. MH+ [Da]	Found in Sample: [S1] F1: 126, Sample	Found in Sample: [S2] F1: 127N, Sample	Found in Sample: [S3] F1: 127C, Sample	Found in Sample: [S4] F1: 128N, Sample	Found in Sample: [S5] F1: 128C, Control	Found in Sample: [S6] F1: 129N, Sample	Found in Sample: [S7] F1: 129C, Sample	Found in Sample: [S8] F1: 130N, Sample	Found in Sample: [S9] F1: 130C, Sample	Found in Sample: [S10] F1: 131, Sample	Abundance Ratio: (F1, 126) / (F1, 128C)	Abundance Ratio: (F1, 127N) / (F1, 128C)	Abundance Ratio: (F1, 127C) / (F1, 128C)	Abundance Ratio: (F1, 128N) / (F1, 128C)	Abundance Ratio: (F1, 129N) / (F1, 128C)	Abundance Ratio: (F1, 129C) / (F1, 128C)	Abundance Ratio: (F1, 130N) / (F1, 128C)	Abundance Ratio: (F1, 130C) / (F1, 128C)	Abundance Ratio: (F1, 131) / (F1, 128C)	Abundance: F1: 126, Sample	Abundance: F1: 127N, Sample	Abundance: F1: 127C, Sample	Abundance: F1: 128N, Sample	Abundance: F1: 128C, Control	Abundance: F1: 129N, Sample	Abundance: F1: 129C, Sample	Abundance: F1: 130N, Sample	Abundance: F1: 130C, Sample	Abundance: F1: 131, Sample	Abundances Count: F1: 126, Sample	Abundances Count: F1: 127N, Sample	Abundances Count: F1: 127C, Sample	Abundances Count: F1: 128N, Sample	Abundances Count: F1: 128C, Control	Abundances Count: F1: 129N, Sample
FALSE	High	[R].VPGAWVGTVK.[A]	2xTMT6plex [N-Term; K10]		FALSE	0.0032022	0	1	1	4	E9Q7P9	E9Q7P9 [707-716]	0	1471.9	High	High	High	High	High	High	High	High	High	High	0.55	0.835	0.621	1.046	1.674	1.47	1.831	3.103	2.607	396500	601700	447500	754300	721000	1207000	1060000	1320000	2237000	1880000	3	3	3	3	3	3
FALSE	High	[R].TAEMQVIVEDR.[N]	1xTMT6plex [N-Term]		FALSE	0.00646479	0	1	1	1	E9Q7P9	E9Q7P9 [107-117]	0	1519.8	High	High	High	High	High	High	High	High	High	High
FALSE	High	[K].SAFYQLELK.[A]	2xTMT6plex [N-Term; K9]		FALSE	0.00826976	0	1	1	18	E9Q7P9	E9Q7P9 [197-205]	0	1556.91	High	High	High	High	High	High	High	High	High	High	0.446	0.708	0.654	1.848	1.955	1.878	1.951	3.332	2.788	1198000	1899000	1756000	4957000	2683000	5245000	5038000	5234000	8939000	7479000	7	7	7	7	7	7
FALSE	High	[R].VIAQDVDTAALLR.[I]	1xTMT6plex [N-Term]		FALSE	6.46218e-05	0	1	1	3	E9Q7P9	E9Q7P9 [830-842]	0	1613.94	High	High	High	High	High	High	High	High	High	High	0.461	1.209	0.99	2.518	1.459	1.351	1.214	2.443	1.903	534200	1403000	1148000	2921000	1160000	1693000	1568000	1409000	2833000	2207000	3	3	3	3	3	3
FALSE	High	[R].NSEMVDYEK.[E]	2xTMT6plex [N-Term; K9]		FALSE	0.00699186	0	1	1	5	E9Q7P9	E9Q7P9 [435-443]	0	1572.8	High	High	High	High	High	High	High	High	High	High	0.188	0.67	0.349	0.599	1.809	1.403	2.05	4.14	3.956	310600	1109000	578500	992000	1656000	2994000	2322000	3395000	6854000	6550000	2	2	2	2	2	2
FALSE	High	[K].AWDADQTAANNR.[I]	1xTMT6plex [N-Term]		FALSE	0.000401421	0	1	1	3	E9Q7P9	E9Q7P9 [717-728]	0	1561.76	High	High	High	High	High	High	High	High	High	High	0.426	0.851	0.614	1.804	1.803	2.644	1.991	4.642	3.373	74620	149100	107700	316100	175200	315900	463200	348900	813400	591000	2	2	2	2	2	2
FALSE	High	[K].LASPLDFETVPFFK.[I]	2xTMT6plex [N-Term; K14]		FALSE	3.72754e-05	0	1	1	21	E9Q7P9	E9Q7P9 [81-94]	0	2069.17	High	High	High	High	High	High	High	High	High	High	0.25	0.504	0.378	0.972	1.393	1.809	1.537	4.874	2.767	442300	891900	668300	1720000	1769000	2463000	3199000	2719000	8620000	4894000	14	14	14	14	14	14
FALSE	High	[K].NLNIYGQEAK.[A]	2xTMT6plex [N-Term; K10]		FALSE	0.00184769	0	1	1	11	E9Q7P9	E9Q7P9 [325-334]	0	1607.92	High	High	High	High	High	High	High	High	High	High	0.446	0.649	0.573	0.859	1.54	1.354	2.386	2.87	3.009	372100	541300	477500	715700	833600	1283000	1129000	1989000	2392000	2508000	3	3	3	3	3	3
FALSE	High	[K].ACDSGGILDNKPK.[T]	3xTMT6plex [N-Term; K11; K13]; 1xCarbamidomethyl [C2]		FALSE	0.000457599	0	1	1	12	E9Q7P9	E9Q7P9 [206-218]	0	2062.16	High	High	High	High	High	High	High	High	High	High	0.705	0.827	0.814	1.286	1.758	1.744	2.263	3.651	3.441	2142000	2511000	2472000	3906000	3036000	5339000	5295000	6872000	11090000	10450000	11	11	11	11	11	11
FALSE	High	[K].ITISTSDGLNIR.[T]	1xTMT6plex [N-Term]		FALSE	0.0118252	0.00117917	1	1	4	E9Q7P9	E9Q7P9 [95-106]	0	1518.87	High	High	High	High	High	High	High	High	High	High	0.729	1.312	0.765	1.327	1.643	1.578	1.569	2.875	2.188	285000	512700	298900	518700	390900	642100	616800	613200	1124000	855100	3	3	3	3	3	3
FALSE	High	[R].EAIDPALEGR.[I]	1xTMT6plex [N-Term]		FALSE	0.012504	0.00117917	1	1	3	E9Q7P9	E9Q7P9 [651-660]	0	1299.71	High	High	High	High	High	High	High	High	High	High	0.413	0.746	0.558	1.347	1.65	2.285	1.555	3.573	2.736	222400	401700	300600	725600	538700	889100	1231000	838000	1925000	1474000	2	2	2	2	2	2
FALSE	High	[K].VIPSTANSNNLFR.[I]	1xTMT6plex [N-Term]		FALSE	0.0130747	0.00117917	1	1	3	E9Q7P9	E9Q7P9 [166-178]	0	1661.92	High	High	High	High	High	High	High	High	High	High	0.812	1.397	0.765	1.184	1.878	1.516	1.564	2.793	2.074	698900	1203000	658100	1019000	860800	1616000	1305000	1347000	2405000	1785000	3	3	3	3	3	3
FALSE	High	[R].IELVDVICTK.[A]	2xTMT6plex [N-Term; K10]; 1xCarbamidomethyl [C8]		FALSE	0.0281724	0.00171593	1	1	3	E9Q7P9	E9Q7P9 [843-852]	0	1647.98	High	High	High	High	High	High	High	High	High	High	0.491	0.515	0.611	1.188	0.585	0.475	0.388	0.649	0.345	324300	340100	403500	783900	660100	386100	313700	256300	428100	227800	2	2	2	2	2	2
FALSE	High	[R].NSEMVDYEK.[E]	2xTMT6plex [N-Term; K9]; 1xOxidation [M4]		FALSE	0.149813	0.00250807	1	1	2	E9Q7P9	E9Q7P9 [435-443]	0	1588.79	High	High	High	High	High	High	High	High	High	High	0.518	1.206	0.464	0.791	1.57	1.429	1.702	4.237	3.912	138500	322100	123900	211200	267200	419400	381700	454800	1132000	1045000	2	2	2	2	2	2
FALSE	High	[R].LDYETQK.[F]	2xTMT6plex [N-Term; K7]		FALSE	0.156645	0.00250807	1	1	6	E9Q7P9	E9Q7P9 [765-771]	0	1354.76	High	High	High	High	High	High	High	High	High	High	0.153	0.254	0.259	0.552	1.607	0.971	1.823	1.719	1.706	580700	962300	983200	2093000	3793000	6095000	3683000	6915000	6521000	6472000	4	4	4	4	4	4
High	Master Protein	A2AKN8	Major urinary protein 5 OS=Mus musculus GN=Mup8 PE=3 SV=1	FALSE	0	64.0569	53.8889	10	97	1	1	180	20.593	4.94	High	High	High	High	High	High	High	High	High	High		100041687	ENSMUSG00000078687	Mup8	4	transport	extracellular	transporter activity	Pf00061	0.269	0.83	0.404	0.775	1.336	2.726	1.374	5.872	4.082	352900	1089000	530800	1017000	1312000	1753000	3577000
Checked	Confidence	Annotated Sequence	Modifications	Modifications in Master Proteins	Contaminant	Qvality PEP	Qvality q-value	# Protein Groups	# Proteins	# PSMs	Master Protein Accessions	Positions in Master Proteins	# Missed Cleavages	Theo. MH+ [Da]	Found in Sample: [S1] F1: 126, Sample	Found in Sample: [S2] F1: 127N, Sample	Found in Sample: [S3] F1: 127C, Sample	Found in Sample: [S4] F1: 128N, Sample	Found in Sample: [S5] F1: 128C, Control	Found in Sample: [S6] F1: 129N, Sample	Found in Sample: [S7] F1: 129C, Sample	Found in Sample: [S8] F1: 130N, Sample	Found in Sample: [S9] F1: 130C, Sample	Found in Sample: [S10] F1: 131, Sample	Abundance Ratio: (F1, 126) / (F1, 128C)	Abundance Ratio: (F1, 127N) / (F1, 128C)	Abundance Ratio: (F1, 127C) / (F1, 128C)	Abundance Ratio: (F1, 128N) / (F1, 128C)	Abundance Ratio: (F1, 129N) / (F1, 128C)	Abundance Ratio: (F1, 129C) / (F1, 128C)	Abundance Ratio: (F1, 130N) / (F1, 128C)	Abundance Ratio: (F1, 130C) / (F1, 128C)	Abundance Ratio: (F1, 131) / (F1, 128C)	Abundance: F1: 126, Sample	Abundance: F1: 127N, Sample	Abundance: F1: 127C, Sample	Abundance: F1: 128N, Sample	Abundance: F1: 128C, Control	Abundance: F1: 129N, Sample	Abundance: F1: 129C, Sample	Abundance: F1: 130N, Sample	Abundance: F1: 130C, Sample	Abundance: F1: 131, Sample	Abundances Count: F1: 126, Sample	Abundances Count: F1: 127N, Sample	Abundances Count: F1: 127C, Sample	Abundances Count: F1: 128N, Sample	Abundances Count: F1: 128C, Control	Abundances Count: F1: 129N, Sample
FALSE	High	[K].AGEYSVTYDGFNTFTIPK.[T]	2xTMT6plex [N-Term; K18]; 1xDeamidated [N12]		FALSE	0.00174686	0	3	21	1	A2AKN8; A2BIN1; A9R9W0	A2AKN8 [95-112]; A2BIN1 [95-112]; A9R9W0 [95-112]	0	2469.26	Not Found	High	High	High	High	High	High	High	High	High
FALSE	High	[K].AGEYSVTYDGFNTFTIPK.[T]	2xTMT6plex [N-Term; K18]		FALSE	0.000266955	0	3	21	5	A2AKN8; A2BIN1; A9R9W0	A2AKN8 [95-112]; A2BIN1 [95-112]; A9R9W0 [95-112]	0	2468.27	High	High	High	High	High	High	High	High	High	High	0.447	0.597	0.382	0.688	1.075	1.05	0.992	1.985	1.64	27160	36220	23160	41760	60710	65240	63740	60240	120500	99570	1	1	1	1	1	1
FALSE	High	[K].DGETFQLMGLYGR.[E]	1xTMT6plex [N-Term]		FALSE	0.000442444	0	3	23	6	A2AKN8; A2BIN1; A9R9W0	A2AKN8 [128-140]; A2BIN1 [128-140]; A9R9W0 [128-140]	0	1715.86	High	High	High	High	High	High	High	High	High	High	0.388	1.021	0.321	0.458	1.374	1.342	1.033	2.62	2.094	239600	630300	197900	282700	617000	847800	827800	637600	1617000	1292000	4	4	4	4	4	4
FALSE	High	[R].FAQLCEEHGILR.[E]	1xTMT6plex [N-Term]; 1xCarbamidomethyl [C5]		FALSE	0.000235939	0	2	15	18	A2AKN8; A2BIN1	A2AKN8 [152-163]; A2BIN1 [152-163]	0	1701.89	High	High	High	High	High	High	High	High	High	High	0.188	0.327	0.3	0.381	1.174	0.86	1.051	1.258	1.305	1099000	1911000	1749000	2226000	5836000	6851000	5020000	6133000	7342000	7615000	16	16	16	16	16	16
FALSE	High	[R].VLENSLVLK.[VF]	2xTMT6plex [N-Term; K9]		FALSE	0.00914546	0	1	4	5	A2AKN8	A2AKN8 [65-73]	0	1472.95	High	High	High	High	High	High	High	High	High	High	0.269	0.83	0.404	0.775	1.336	2.726	1.374	5.872	4.082	352900	1089000	530800	1017000	1312000	1753000	3577000	1804000	7707000	5358000	5	5	5	5	5	5
FALSE	High	[R].ENIIDLSNANR.[C]	1xTMT6plex [N-Term]		FALSE	0.00124277	0	3	19	15	A2AKN8; A2BIN1; A9R9W0	A2AKN8 [164-174]; A2BIN1 [164-174]; A9R9W0 [164-174]	0	1487.8	High	High	High	High	High	High	High	High	High	High	0.128	0.409	0.16	0.835	1.193	1.626	1.056	2.445	1.629	938100	3004000	1179000	6137000	7349000	8770000	11950000	7763000	17970000	11970000	8	8	8	8	8	8
FALSE	High	[R].ENIIDLSNANR.[C]	1xTMT6plex [N-Term]; 1xDeamidated [N8]		FALSE	0.00171448	0	3	19	2	A2AKN8; A2BIN1; A9R9W0	A2AKN8 [164-174]; A2BIN1 [164-174]; A9R9W0 [164-174]	0	1488.79	High	High	High	High	High	High	High	High	High	High
FALSE	High	[K].INGEWHTIILASDK.[R]	2xTMT6plex [N-Term; K14]; 1xDeamidated [N2]		FALSE	0.0104581	0.00117917	3	22	3	A2AKN8; A2BIN1; A9R9W0	A2AKN8 [33-46]; A2BIN1 [33-46]; A9R9W0 [33-46]	0	2056.15	High	High	High	High	High	High	High	High	High	High	1.366	2.742	1.419	3.65	1.197	1.148	0.797	1.164	1.047	163700	328700	170100	437600	119900	143500	137600	95600	139500	125500	2	2	2	2	2	2
FALSE	High	[K].DGETFQLMGLYGR.[E]	1xTMT6plex [N-Term]; 1xOxidation [M8]		FALSE	0.0118693	0.00117917	3	23	11	A2AKN8; A2BIN1; A9R9W0	A2AKN8 [128-140]; A2BIN1 [128-140]; A9R9W0 [128-140]	0	1731.86	High	High	High	High	High	High	High	High	High	High	0.406	0.849	0.361	0.519	1.32	0.918	1.004	1.66	1.561	725900	1516000	644500	927300	1787000	2358000	1640000	1794000	2965000	2789000	11	11	11	11	11	11
FALSE	High	[K].INGEWHTIILASDKR.[E]	2xTMT6plex [N-Term; K14]		FALSE	0.0096712	0.00117917	3	22	5	A2AKN8; A2BIN1; A9R9W0	A2AKN8 [33-47]; A2BIN1 [33-47]; A9R9W0 [33-47]	1	2211.27	High	High	High	High	High	High	High	High	High	High	0.262	0.513	0.292	0.699	1.213	0.708	1.299	1.178	1.31	95780	187600	106600	255300	365500	443200	258600	474600	430500	478900	2	2	2	2	2	2
FALSE	High	[R].EPDLSSDIK.[E]	2xTMT6plex [N-Term; K9]		FALSE	0.0137734	0.00117917	4	26	10	A2AKN8; Q5FW60; A2BIN1; A9R9W0	A2AKN8 [141-149]; Q5FW60 [142-150]; A2BIN1 [141-149]; A9R9W0 [141-149]	0	1461.82	High	High	High	High	High	High	High	High	High	High	0.254	0.444	0.26	0.495	1.397	1.606	1.001	2.236	2.236	855600	1494000	873200	1666000	3365000	4701000	5405000	3368000	7524000	7522000	8	8	8	8	8	8
FALSE	High	[K].IEDNGNFR.[L]	1xTMT6plex [N-Term]; 1xDeamidated [N4]		FALSE	0.0867589	0.00171593	3	19	3	A2AKN8; A2BIN1; A9R9W0	A2AKN8 [50-57]; A2BIN1 [50-57]; A9R9W0 [50-57]	0	1194.6	High	High	High	High	High	High	High	High	High	High	0.132	0.223	0.11	0.249	1.518	0.845	1.375	1.226	1.783	359500	607500	299900	679000	2723000	4133000	2302000	3745000	3338000	4856000	2	2	2	2	2	2
FALSE	High	[R].EKIEDNGNFR.[L]	2xTMT6plex [N-Term; K2]; 1xDeamidated [N6]		FALSE	0.0880029	0.00171593	3	19	11	A2AKN8; A2BIN1; A9R9W0	A2AKN8 [48-57]; A2BIN1 [48-57]; A9R9W0 [48-57]	1	1680.9	High	High	High	High	High	High	High	High	High	High	0.2	0.442	0.164	0.388	1.297	0.668	1.157	1.199	1.464	411800	908300	338100	797700	2057000	2668000	1375000	2381000	2466000	3012000	3	3	3	3	3	3
FALSE	High	[R].EKIEDNGNFR.[L]	2xTMT6plex [N-Term; K2]		FALSE	0.102123	0.00171593	3	19	2	A2AKN8; A2BIN1; A9R9W0	A2AKN8 [48-57]; A2BIN1 [48-57]; A9R9W0 [48-57]	1	1679.91	High	High	High	High	High	High	High	High	High	High	0.05	0.168	0.062	0.26	1.314	0.697	1.264	1.19	1.571	76700	255700	95060	395900	1521000	1998000	1061000	1922000	1810000	2390000	1	1	1	1	1	1
High	Master Protein	F8VQM0	Alkaline phosphatase OS=Mus musculus GN=Akp3 PE=3 SV=1	FALSE	0	62.3406	21.8247	14	80	8	1	559	60.253	6.6	High	High	High	High	High	High	High	High	High	High		11648	ENSMUSG00000036500	Akp3	1	cell differentiation;metabolic process		catalytic activity;metal ion binding;protein binding	Pf00245	0.393	0.669	0.606	1.429	1.785	4.31	1.978	1.507	1.269	3906000	6653000	6030000	14220000	9945000	17750000	42870000
Checked	Confidence	Annotated Sequence	Modifications	Modifications in Master Proteins	Contaminant	Qvality PEP	Qvality q-value	# Protein Groups	# Proteins	# PSMs	Master Protein Accessions	Positions in Master Proteins	# Missed Cleavages	Theo. MH+ [Da]	Found in Sample: [S1] F1: 126, Sample	Found in Sample: [S2] F1: 127N, Sample	Found in Sample: [S3] F1: 127C, Sample	Found in Sample: [S4] F1: 128N, Sample	Found in Sample: [S5] F1: 128C, Control	Found in Sample: [S6] F1: 129N, Sample	Found in Sample: [S7] F1: 129C, Sample	Found in Sample: [S8] F1: 130N, Sample	Found in Sample: [S9] F1: 130C, Sample	Found in Sample: [S10] F1: 131, Sample	Abundance Ratio: (F1, 126) / (F1, 128C)	Abundance Ratio: (F1, 127N) / (F1, 128C)	Abundance Ratio: (F1, 127C) / (F1, 128C)	Abundance Ratio: (F1, 128N) / (F1, 128C)	Abundance Ratio: (F1, 129N) / (F1, 128C)	Abundance Ratio: (F1, 129C) / (F1, 128C)	Abundance Ratio: (F1, 130N) / (F1, 128C)	Abundance Ratio: (F1, 130C) / (F1, 128C)	Abundance Ratio: (F1, 131) / (F1, 128C)	Abundance: F1: 126, Sample	Abundance: F1: 127N, Sample	Abundance: F1: 127C, Sample	Abundance: F1: 128N, Sample	Abundance: F1: 128C, Control	Abundance: F1: 129N, Sample	Abundance: F1: 129C, Sample	Abundance: F1: 130N, Sample	Abundance: F1: 130C, Sample	Abundance: F1: 131, Sample	Abundances Count: F1: 126, Sample	Abundances Count: F1: 127N, Sample	Abundances Count: F1: 127C, Sample	Abundances Count: F1: 128N, Sample	Abundances Count: F1: 128C, Control	Abundances Count: F1: 129N, Sample
FALSE	High	[K].KLQPIQTSAK.[N]	3xTMT6plex [N-Term; K1; K10]		FALSE	0.000706332	0	2	3	6	F8VQM0; F8VPQ6	F8VQM0 [44-53]; F8VPQ6 [45-54]	1	1801.15	High	High	High	High	High	High	High	High	High	High	1.577	2.506	0.973	3.233	1.771	2.797	2.023	2.418	2.472	2209000	3511000	1363000	4528000	1401000	2481000	3917000	2834000	3387000	3463000	4	4	4	4	4	4
FALSE	High	[KR].KAAEALDAAK.[K]	3xTMT6plex [N-Term; K1; K10]		FALSE	0.000203896	0	2	4	9	F8VQM0; F8VPQ6	F8VQM0 [34-43]; F8VPQ6 [35-44]	1	1675.04	High	High	High	High	High	High	High	High	High	High	1.351	1.365	2.812	2.105	1.828	2.058	2.989	3.139	3.754	2536000	2564000	5279000	3952000	1877000	3432000	3864000	5612000	5894000	7048000	5	5	5	5	5	5
FALSE	High	[K].AAEALDAAK.[K]	2xTMT6plex [N-Term; K9]		FALSE	0.00907754	0	2	4	11	F8VQM0; F8VPQ6	F8VQM0 [35-43]; F8VPQ6 [36-44]	0	1317.78	High	High	High	High	High	High	High	High	High	High	0.41	0.769	0.284	0.911	1.928	1.353	2.105	1.989	2.638	2939000	5511000	2038000	6526000	7167000	13820000	9697000	15090000	14260000	18900000	7	7	7	7	7	7
FALSE	High	[R].NLVQEWLSK.[H]	2xTMT6plex [N-Term; K9]		FALSE	0.00911144	0	1	2	13	F8VQM0	F8VQM0 [251-259]	0	1574.93	High	High	High	High	High	High	High	High	High	High	0.325	0.354	0.51	1.219	2	2.305	1.554	1.267	0.905	784200	854400	1232000	2942000	2413000	4825000	5563000	3751000	3057000	2184000	11	11	11	11	11	11
FALSE	High	[K].AQDPSVTYLMGLFEPVDTK.[F]	2xTMT6plex [N-Term; K19]; 1xDeamidated [Q2]		FALSE	0.00326264	0	1	2	2	F8VQM0	F8VQM0 [276-294]	0	2570.35	High	High	High	High	High	High	High	High	High	High
FALSE	High	[K].AQDPSVTYLMGLFEPVDTK.[F]	2xTMT6plex [N-Term; K19]		FALSE	0.000701066	0	1	2	1	F8VQM0	F8VQM0 [276-294]	0	2569.36	High	High	High	High	High	High	High	High	High	High	0.891	1.08	1.511	6.871	1.192	3.919	0.964	3.013	2.042	8539	10350	14480	65850	9584	11420	37570	9236	28870	19570	1	1	1	1	1	1
FALSE	High	[K].GQLEGHLGPETPLAMDR.[F]	1xTMT6plex [N-Term]		FALSE	0.00251107	0	1	2	1	F8VQM0	F8VQM0 [76-92]	0	2050.06	High	High	High	High	High	High	High	High	High	High	0.647	0.897	1.087	0.808	1.434	0.952	1.534	1.423	1.821	41050	56930	68980	51300	63470	91050	60410	97360	90310	115600	1	1	1	1	1	1
FALSE	High	[R].DPLMDPSLK.[D]	2xTMT6plex [N-Term; K9]		FALSE	0.0105756	0.00117917	1	2	9	F8VQM0	F8VQM0 [300-308]	0	1473.84	High	High	High	High	High	High	High	High	High	High	0.358	0.72	0.559	0.493	2.009	2.055	2.684	1.16	1.207	1178000	2372000	1841000	1626000	3295000	6618000	6769000	8842000	3820000	3975000	6	6	6	6	6	6
FALSE	High	[K].LQPIQTSAK.[N]	2xTMT6plex [N-Term; K9]		FALSE	0.0095994	0.00117917	2	3	5	F8VQM0; F8VPQ6	F8VQM0 [45-53]; F8VPQ6 [46-54]	0	1443.89	High	High	High	High	High	High	High	High	High	High	2.682	5.879	1.499	7.963	1.891	5.316	1.53	2.582	1.628	3482000	7633000	1947000	10340000	1298000	2456000	6902000	1986000	3352000	2114000	4	4	4	4	4	4
FALSE	High	[K].AAEALDAAKK.[L]	3xTMT6plex [N-Term; K9; K10]		FALSE	0.0326541	0.00171593	2	4	3	F8VQM0; F8VPQ6	F8VQM0 [35-44]; F8VPQ6 [36-45]	1	1675.04	High	High	High	High	High	High	High	High	High	High	1.671	4.004	0.882	3.53	1.53	1.907	1.497	1.435	1.661	789600	1893000	417000	1669000	472600	723100	901400	707400	678200	784800	1	1	1	1	1	1
FALSE	High	[K].GQLEGHLGPETPLAMDR.[F]	1xTMT6plex [N-Term]; 1xOxidation [M15]		FALSE	0.0181306	0.00171593	1	2	1	F8VQM0	F8VQM0 [76-92]	0	2066.05	High	High	High	High	High	High	High	High	High	High	0.504	0.725	0.446	0.54	1.607	0.729	1.652	1.275	1.846	78640	113000	69560	84190	155900	250600	113600	257500	198800	287800	1	1	1	1	1	1
FALSE	High	[K].SVGVVTTTR.[V]	1xTMT6plex [N-Term]		FALSE	0.0275546	0.00171593	2	3	4	F8VQM0; F8VPQ6	F8VQM0 [161-169]; F8VPQ6 [162-170]	0	1148.68	High	High	High	High	High	High	High	High	High	High	0.887	1.343	0.734	2.245	1.111	2.034	1.778	2.625	2.241	5216000	7899000	4317000	13200000	5880000	6531000	11960000	10450000	15430000	13170000	4	4	4	4	4	4
FALSE	High	[K].DMTEAAVK.[V]	2xTMT6plex [N-Term; K8]		FALSE	0.0313561	0.00171593	1	1	9	F8VQM0	F8VQM0 [309-316]	0	1322.74	High	High	High	High	High	High	High	High	High	High	0.427	0.761	0.825	2.921	1.152	10.851	1.416	2.247	1.574	1025000	1826000	1977000	7005000	2398000	2763000	26020000	3395000	5388000	3774000	4	4	4	4	4	4
FALSE	High	[K].TIGVSAAAR.[F]	1xTMT6plex [N-Term]		FALSE	0.0779464	0.00171593	1	1	2	F8VQM0	F8VQM0 [128-136]	0	1074.65	High	High	High	High	High	High	High	High	High	High	0.886	1.454	0.911	2.774	1.968	3.52	1.415	1.549	1.277	611400	1003000	628300	1914000	689800	1357000	2428000	976400	1069000	881100	1	1	1	1	1	1
FALSE	High	[R].QQAAVPVK.[S]	2xTMT6plex [N-Term; K8]		FALSE	0.131388	0.00171593	1	1	2	F8VQM0	F8VQM0 [439-446]	0	1298.82	High	High	High	High	High	High	High	High	High	High	0.541	0.947	0.418	0.675	1.294	0.67	1.649	1.05	1.527	108200	189400	83670	135100	200000	258800	133900	329800	210100	305300	1	1	1	1	1	1
FALSE	High	[R].DPLMDPSLK.[D]	2xTMT6plex [N-Term; K9]; 1xOxidation [M4]		FALSE	0.0605801	0.00171593	1	2	1	F8VQM0	F8VQM0 [300-308]	0	1489.83	High	High	High	High	High	High	High	High	High	High	0.098	0.317	0.159	0.543	2.181	2.411	2.794	1.567	1.498	70880	228300	114700	391800	721100	1573000	1738000	2014000	1130000	1080000	1	1	1	1	1	1
FALSE	High	[R].NWYGDADMPASALR.[E]	1xTMT6plex [N-Term]; 1xOxidation [M8]		FALSE	0.192041	0.00883776	1	2	1	F8VQM0	F8VQM0 [186-199]	0	1811.86	High	High	High	High	High	High	High	High	High	High
High	Master Protein	2190400	gnl|PID|e321549 *CON* keratin (Y13621) [Homo sapiens]	TRUE	0	60.5692	29.901	14	49	1	1	505	54.936	5.55	High	High	High	High	High	High	High	High	High	High		3887		KRT81	12	transport		catalytic activity;motor activity;protein binding;structural molecule activity	Pf00038, Pf01576, Pf05557, Pf05911, Pf07888, Pf07926, Pf09726, Pf11559, Pf12128, Pf13166
Checked	Confidence	Annotated Sequence	Modifications	Modifications in Master Proteins	Contaminant	Qvality PEP	Qvality q-value	# Protein Groups	# Proteins	# PSMs	Master Protein Accessions	Positions in Master Proteins	# Missed Cleavages	Theo. MH+ [Da]	Found in Sample: [S1] F1: 126, Sample	Found in Sample: [S2] F1: 127N, Sample	Found in Sample: [S3] F1: 127C, Sample	Found in Sample: [S4] F1: 128N, Sample	Found in Sample: [S5] F1: 128C, Control	Found in Sample: [S6] F1: 129N, Sample	Found in Sample: [S7] F1: 129C, Sample	Found in Sample: [S8] F1: 130N, Sample	Found in Sample: [S9] F1: 130C, Sample	Found in Sample: [S10] F1: 131, Sample	Abundance Ratio: (F1, 126) / (F1, 128C)	Abundance Ratio: (F1, 127N) / (F1, 128C)	Abundance Ratio: (F1, 127C) / (F1, 128C)	Abundance Ratio: (F1, 128N) / (F1, 128C)	Abundance Ratio: (F1, 129N) / (F1, 128C)	Abundance Ratio: (F1, 129C) / (F1, 128C)	Abundance Ratio: (F1, 130N) / (F1, 128C)	Abundance Ratio: (F1, 130C) / (F1, 128C)	Abundance Ratio: (F1, 131) / (F1, 128C)	Abundance: F1: 126, Sample	Abundance: F1: 127N, Sample	Abundance: F1: 127C, Sample	Abundance: F1: 128N, Sample	Abundance: F1: 128C, Control	Abundance: F1: 129N, Sample	Abundance: F1: 129C, Sample	Abundance: F1: 130N, Sample	Abundance: F1: 130C, Sample	Abundance: F1: 131, Sample	Abundances Count: F1: 126, Sample	Abundances Count: F1: 127N, Sample	Abundances Count: F1: 127C, Sample	Abundances Count: F1: 128N, Sample	Abundances Count: F1: 128C, Control	Abundances Count: F1: 129N, Sample
FALSE	High	[R].ATAENEFVALK.[K]	2xTMT6plex [N-Term; K11]		TRUE	0.000775599	0	2	12	1	2190400; 1903220	2190400 [202-212]; 1903220 [199-209]	0	1650.95	High	High	High	High	High	High	High	High	High	High	0.639	1.473	2.159	7.276	2.09	0.776	2.633	1.482	2.074	96450	222200	325700	1098000	150800	315300	117100	397100	223500	312800	1	1	1	1	1	1
FALSE	High	[R-].ILQSHISDTSVVVK.[L]	2xTMT6plex [N-Term; K14]		TRUE	0.00281981	0	1	5	1	2190400	2190400 [249-262]	0	1984.18	High	High	High	High	High	High	High	High	High	High
FALSE	High	[K].LEAAVAQSEQQGEAALSDAR.[C]	1xTMT6plex [N-Term]		TRUE	0.000162277	0	2	6	1	2190400; 1903220	2190400 [346-365]; 1903220 [343-362]	0	2273.16	High	High	High	High	High	High	High	High	High	High
FALSE	High	[K].LAELEGALQK.[A]	2xTMT6plex [N-Term; K10]		TRUE	0.00363635	0	3	12	5	1903218; 2190400; 1903220	1903218 [385-394]; 2190400 [368-377]; 1903220 [365-374]	0	1529.93	High	High	High	High	High	High	High	High	High	High	0.49	0.697	0.653	5.896	1.631	0.689	1.784	1.064	2.272	202500	287700	269800	2436000	413000	673600	284700	736900	439600	938600	4	4	4	4	4	4
FALSE	High	[K].SDLEANVEALIQEIDFLR.[R]	1xTMT6plex [N-Term]		TRUE	1.02856e-05	0	2	5	4	2190400; 1903220	2190400 [223-240]; 1903220 [220-237]	0	2304.23	High	High	High	High	High	High	High	High	High	High	0.972	1.663	1.76	4.107	1.629	1.327	0.901	1.152	1.845	22050	37740	39950	93200	22690	36970	30120	20440	26150	41860	2	2	2	2	2	2
FALSE	High	[R].KSDLEANVEALIQEIDFLR.[R]	2xTMT6plex [N-Term; K1]; 1xDeamidated [Q/N]		TRUE	0.00520585	0	2	5	2	2190400; 1903220	2190400 [222-240]; 1903220 [219-237]	1	2662.47	High	High	High	High	High	High	High	High	High	High	0.352	0.371	0.343	2.167	1.603	1.341	3.411	3.981	3.405	2616	2763	2554	16120	7438	11920	9972	25370	29610	25330	1	1	1	1	1	1
FALSE	High	[R].KSDLEANVEALIQEIDFLR.[R]	2xTMT6plex [N-Term; K1]		TRUE	1.37817e-06	0	2	5	9	2190400; 1903220	2190400 [222-240]; 1903220 [219-237]	1	2661.49	High	High	High	High	High	High	High	High	High	High	0.562	1.055	0.877	7.352	1.697	1.048	2.141	2.532	3.809	48150	90350	75080	629600	85640	145300	89710	183300	216800	326200	7	7	7	7	7	7
FALSE	High	[R].LASELNHVQEVLEGYK.[K]	2xTMT6plex [N-Term; K16]		TRUE	0.000603604	0	3	7	2	1903218; 2190400; 1903220	1903218 [193-208]; 2190400 [176-191]; 1903220 [173-188]	0	2287.27	High	High	High	High	High	High	High	High	High	High	1.235	3.601	0.71	4.976	1.136	0.398	0.66	0.699	1.106	69880	203800	40150	281600	56590	64270	22500	37350	39530	62570	1	1	1	1	1	1
FALSE	High	[R].GLTGGFGSHSVCGGFR.[A]	1xTMT6plex [N-Term]; 1xCarbamidomethyl [C12]		TRUE	0.000285558	0	2	4	3	2190400; 1903220	2190400 [40-55]; 1903220 [37-52]	0	1824.9	High	High	High	High	High	High	High	High	High	High	0.895	1.476	0.87	2.969	1.187	0.661	0.982	1.13	1.072	188000	309900	182700	623400	209900	249100	138800	206100	237300	225000	1	1	1	1	1	1
FALSE	High	[R].DLNMDCIIAEIK.[A]	2xTMT6plex [N-Term; K12]; 1xCarbamidomethyl [C6]		TRUE	0.00884376	0	3	5	3	1903218; 2190400; 1903220	1903218 [285-296]; 2190400 [268-279]; 1903220 [265-276]	0	1893.02	High	High	High	High	High	High	High	High	High	High
FALSE	High	[R].TKEEINELNR.[MVL]	2xTMT6plex [N-Term; K2]		TRUE	0.126021	0.00171593	3	14	3	1903218; 2190400; 1903220	1903218 [335-344]; 2190400 [318-327]; 1903220 [315-324]	1	1703.97	High	High	High	High	High	High	High	High	High	High	1.322	2.397	1.945	12.343	2.011	1.202	1.303	1.727	1.25	360100	653000	529800	3363000	272400	547800	327500	355100	470500	340500	1	1	1	1	1	1
FALSE	High	[R].ATAENEFVALKK.[D]	3xTMT6plex [N-Term; K11; K12]		TRUE	0.0289104	0.00171593	2	12	1	2190400; 1903220	2190400 [202-213]; 1903220 [199-210]	1	2008.2	High	High	High	High	High	High	High	High	High	High
FALSE	High	[R].AEAESWYR.[ST]	1xTMT6plex [N-Term]		TRUE	0.157183	0.00250807	3	20	2	1903218; 2190400; 1903220	1903218 [308-315]; 2190400 [291-298]; 1903220 [288-295]	0	1240.62	High	High	High	High	High	High	High	High	High	High	0.79	1.059	0.813	7.316	2.622	0.73	1.12	1.473	2.196	321300	430400	330300	2974000	406500	1066000	296700	455100	598700	892600	1	1	1	1	1	1
FALSE	High	[RK].FAAFIDK.[VE]	2xTMT6plex [N-Term; K7]		TRUE	0.16829	0.0041472	3	18	7	1903218; 2190400; 1903220	1903218 [134-140]; 2190400 [117-123]; 1903220 [114-120]	0	1269.76	High	High	High	High	High	High	High	High	High	High	4.984	7.821	13.508	100	40.783	11.149	15.573	10.851	20.266	450100	706400	1220000	36160000	90320	3683000	1007000	1406000	980100	1830000	5	5	5	5	1	5
FALSE	High	[R].FLEQQNK.[LAVIM]	2xTMT6plex [N-Term; K7]		TRUE	0.186933	0.00804114	6	62	5	125105; 1346344; 88052; 1903218; 2190400; 1903220	125105 [188-194]; 1346344 [183-189]; 88052 [187-193]; 1903218 [143-149]; 2190400 [126-132]; 1903220 [123-129]	0	1364.79	High	High	High	High	High	High	High	High	High	High
High	Master Protein	P07759	Serine protease inhibitor A3K OS=Mus musculus GN=Serpina3k PE=1 SV=2	FALSE	0	57.006	24.6411	8	53	8	1	418	46.85	5.16	High	High	High	High	High	High	High	High	High	High		20714		Serpina3k	12	regulation of biological process;response to stimulus	extracellular	enzyme regulator activity;protein binding	Pf00079	0.627	1.001	0.759	3.384	1.903	2.696	1.18	3.923	1.656	2987000	4768000	3620000	16130000	4766000	9071000	12850000
Checked	Confidence	Annotated Sequence	Modifications	Modifications in Master Proteins	Contaminant	Qvality PEP	Qvality q-value	# Protein Groups	# Proteins	# PSMs	Master Protein Accessions	Positions in Master Proteins	# Missed Cleavages	Theo. MH+ [Da]	Found in Sample: [S1] F1: 126, Sample	Found in Sample: [S2] F1: 127N, Sample	Found in Sample: [S3] F1: 127C, Sample	Found in Sample: [S4] F1: 128N, Sample	Found in Sample: [S5] F1: 128C, Control	Found in Sample: [S6] F1: 129N, Sample	Found in Sample: [S7] F1: 129C, Sample	Found in Sample: [S8] F1: 130N, Sample	Found in Sample: [S9] F1: 130C, Sample	Found in Sample: [S10] F1: 131, Sample	Abundance Ratio: (F1, 126) / (F1, 128C)	Abundance Ratio: (F1, 127N) / (F1, 128C)	Abundance Ratio: (F1, 127C) / (F1, 128C)	Abundance Ratio: (F1, 128N) / (F1, 128C)	Abundance Ratio: (F1, 129N) / (F1, 128C)	Abundance Ratio: (F1, 129C) / (F1, 128C)	Abundance Ratio: (F1, 130N) / (F1, 128C)	Abundance Ratio: (F1, 130C) / (F1, 128C)	Abundance Ratio: (F1, 131) / (F1, 128C)	Abundance: F1: 126, Sample	Abundance: F1: 127N, Sample	Abundance: F1: 127C, Sample	Abundance: F1: 128N, Sample	Abundance: F1: 128C, Control	Abundance: F1: 129N, Sample	Abundance: F1: 129C, Sample	Abundance: F1: 130N, Sample	Abundance: F1: 130C, Sample	Abundance: F1: 131, Sample	Abundances Count: F1: 126, Sample	Abundances Count: F1: 127N, Sample	Abundances Count: F1: 127C, Sample	Abundances Count: F1: 128N, Sample	Abundances Count: F1: 128C, Control	Abundances Count: F1: 129N, Sample
FALSE	High	[K].AVLDVAETGTEAAAATGVIGGIR.[K]	1xTMT6plex [N-Term]		FALSE	1.06517e-07	0	1	1	9	P07759	P07759 [361-383]	0	2371.3	High	High	High	High	High	High	High	High	High	High	1.176	1.905	1.344	1.671	1.213	2.235	1.243	1.781	1.541	329700	533900	376600	468300	280200	340100	626300	348300	499000	431800	8	8	8	8	8	8
FALSE	High	[K].DLQILAEFHEK.[T]	2xTMT6plex [N-Term; K11]		FALSE	0.00035745	0	1	2	5	P07759	P07759 [145-155]	0	1801.03	High	High	High	High	High	High	High	High	High	High	0.8	1.373	1.692	10.966	2.531	3.298	1.291	3.634	1.548	376000	645000	795400	5153000	470000	1189000	1550000	606600	1708000	727700	5	5	5	5	5	5
FALSE	High	[R].ALYQTEAFTADFQQPTEAK.[N]	2xTMT6plex [N-Term; K19]		FALSE	4.1266e-06	0	1	1	2	P07759	P07759 [158-176]	0	2617.36	High	High	High	High	High	High	High	High	High	High	0.705	1.302	1.063	5.152	1.634	5.971	1.33	3.116	1.552	78130	144300	117800	571200	110900	181200	662100	147400	345500	172000	2	2	2	2	2	2
FALSE	High	[R].ALYQTEAFTADFQQPTEAK.[N]	2xTMT6plex [N-Term; K19]; 1xDeamidated [Q]		FALSE	0.000105517	0	1	1	2	P07759	P07759 [158-176]	0	2618.34	High	High	High	High	High	High	High	High	High	High
FALSE	High	[K].TMEEILEGLK.[F]	2xTMT6plex [N-Term; K10]		FALSE	0.00218648	0	1	1	14	P07759	P07759 [94-103]	0	1620.93	High	High	High	High	High	High	High	High	High	High	0.366	0.74	0.591	2.287	2.374	1.45	1.186	4.853	1.876	516300	1045000	835400	3230000	1412000	3354000	2049000	1675000	6855000	2649000	14	14	14	14	14	14
FALSE	High	[K].TMEEILEGLK.[F]	2xTMT6plex [N-Term; K10]; 1xOxidation [M2]		FALSE	0.00808679	0	1	1	5	P07759	P07759 [94-103]	0	1636.92	High	High	High	High	High	High	High	High	High	High	0.277	0.611	0.344	1.729	1.85	1.109	0.955	3.484	1.563	358400	792100	445200	2241000	1296000	2398000	1438000	1238000	4515000	2026000	4	4	4	4	4	4
FALSE	High	[K].ISFDPQDTFESEFYLDEK.[R]	2xTMT6plex [N-Term; K18]		FALSE	0.000142352	0	1	2	3	P07759	P07759 [218-235]	0	2668.31	High	High	High	High	High	High	High	High	High	High	0.706	1.22	1.462	1.511	1.385	1.703	1.57	4.957	2.687	81940	141700	169800	175500	116100	160800	197700	182300	575600	312000	3	3	3	3	3	3
FALSE	High	[K].KLSVSQVVHK.[A]	3xTMT6plex [N-Term; K1; K10]		FALSE	0.0121825	0.00117917	1	1	6	P07759	P07759 [351-360]	1	1812.17	High	High	High	High	High	High	High	High	High	High	2.219	2.164	1.383	4.128	1.493	7.774	1.592	4.213	1.645	869200	847600	541700	1617000	391700	584800	3045000	623600	1650000	644200	2	2	2	2	2	2
FALSE	High	[K].LSVSQVVHK.[A]	2xTMT6plex [N-Term; K9]		FALSE	0.010936	0.00117917	1	1	6	P07759	P07759 [352-360]	0	1454.91	High	High	High	High	High	High	High	High	High	High	0.548	0.899	0.49	3.88	1.254	4.762	1.166	3.701	1.349	377600	618900	337700	2672000	688600	863400	3279000	802700	2549000	928700	4	4	4	4	4	4
FALSE	High	[R].LEEDVLPEMGIK.[E]	2xTMT6plex [N-Term; K12]		FALSE	0.0667877	0.00171593	1	1	1	P07759	P07759 [323-334]	0	1831.03	High	High	High	High	High	High	High	High	High	High
High	Master Protein	G3X9V8	MCG129038 OS=Mus musculus GN=Serpinb3a PE=3 SV=1	FALSE	0	55.4158	23.2558	10	44	10	1	387	44.424	5.5	High	High	High	High	High	High	High	High	High	High		20248	ENSMUSG00000044594	Serpinb3a	1	regulation of biological process	extracellular	enzyme regulator activity;protein binding	Pf00079	0.341	0.479	0.354	0.856	2.055	0.813	1.171	1.413	1.424	2418000	3399000	2513000	6072000	7090000	14570000	5766000
Checked	Confidence	Annotated Sequence	Modifications	Modifications in Master Proteins	Contaminant	Qvality PEP	Qvality q-value	# Protein Groups	# Proteins	# PSMs	Master Protein Accessions	Positions in Master Proteins	# Missed Cleavages	Theo. MH+ [Da]	Found in Sample: [S1] F1: 126, Sample	Found in Sample: [S2] F1: 127N, Sample	Found in Sample: [S3] F1: 127C, Sample	Found in Sample: [S4] F1: 128N, Sample	Found in Sample: [S5] F1: 128C, Control	Found in Sample: [S6] F1: 129N, Sample	Found in Sample: [S7] F1: 129C, Sample	Found in Sample: [S8] F1: 130N, Sample	Found in Sample: [S9] F1: 130C, Sample	Found in Sample: [S10] F1: 131, Sample	Abundance Ratio: (F1, 126) / (F1, 128C)	Abundance Ratio: (F1, 127N) / (F1, 128C)	Abundance Ratio: (F1, 127C) / (F1, 128C)	Abundance Ratio: (F1, 128N) / (F1, 128C)	Abundance Ratio: (F1, 129N) / (F1, 128C)	Abundance Ratio: (F1, 129C) / (F1, 128C)	Abundance Ratio: (F1, 130N) / (F1, 128C)	Abundance Ratio: (F1, 130C) / (F1, 128C)	Abundance Ratio: (F1, 131) / (F1, 128C)	Abundance: F1: 126, Sample	Abundance: F1: 127N, Sample	Abundance: F1: 127C, Sample	Abundance: F1: 128N, Sample	Abundance: F1: 128C, Control	Abundance: F1: 129N, Sample	Abundance: F1: 129C, Sample	Abundance: F1: 130N, Sample	Abundance: F1: 130C, Sample	Abundance: F1: 131, Sample	Abundances Count: F1: 126, Sample	Abundances Count: F1: 127N, Sample	Abundances Count: F1: 127C, Sample	Abundances Count: F1: 128N, Sample	Abundances Count: F1: 128C, Control	Abundances Count: F1: 129N, Sample
FALSE	High	[K].INSWVESQTNGK.[I]	2xTMT6plex [N-Term; K12]; 1xDeamidated [N10]		FALSE	0.000167836	0	1	1	6	G3X9V8	G3X9V8 [144-155]	0	1821.97	High	High	High	High	High	High	High	High	High	High	0.343	0.637	0.264	0.67	1.658	0.808	1.099	1.472	1.493	322200	598000	247500	628600	938600	1556000	758700	1031000	1382000	1401000	4	4	4	4	4	4
FALSE	High	[K].EYYQANVESLDFEHAAEESEKK.[I]	3xTMT6plex [N-Term; K21; K22]		FALSE	3.13998e-06	0	1	1	2	G3X9V8	G3X9V8 [122-143]	1	3303.66	High	High	High	High	High	High	High	High	High	High	1.036	0.687	0.827	1.64	1.322	1.583	1.123	2.225	1.579	70410	46720	56250	111500	67980	89890	107600	76370	151200	107400	1	1	1	1	1	1
FALSE	High	[K].EYYQANVESLDFEHAAEESEK.[K]	2xTMT6plex [N-Term; K21]		FALSE	1.36366e-07	0	1	1	1	G3X9V8	G3X9V8 [122-142]	0	2946.4	High	High	High	High	High	High	High	High	High	High	1.273	1.102	0.727	2.128	2.023	2.556	0.857	5.589	3.188	43810	37940	25040	73260	34430	69660	88010	29510	192400	109700	1	1	1	1	1	1
FALSE	High	[K].EYYQANVESLDFEHAAEESEK.[K]	2xTMT6plex [N-Term; K21]; 1xDeamidated [N6]		FALSE	3.19723e-05	0	1	1	1	G3X9V8	G3X9V8 [122-142]	0	2947.39	High	High	High	High	High	High	High	High	High	High
FALSE	High	[K].IKDLFPNGSLNR.[S]	2xTMT6plex [N-Term; K2]; 1xDeamidated [N7]		FALSE	0.00823898	0	1	1	3	G3X9V8	G3X9V8 [156-167]	1	1833.06	High	High	High	High	High	High	High	High	High	High	0.179	0.256	0.182	0.542	1.646	0.674	1.014	1.096	0.988	91120	130400	92910	276300	509500	838600	343600	516900	558300	503200	1	1	1	1	1	1
FALSE	High	[K].GFPFVQTFLEDIK.[E]	2xTMT6plex [N-Term; K13]		FALSE	0.00573676	0	1	1	3	G3X9V8	G3X9V8 [109-121]	0	1999.13	High	High	High	High	High	High	High	High	High	High	0.897	1.153	1.14	2.143	1.503	2.164	0.892	4.525	1.759	33340	42820	42370	79620	37160	55830	80390	33130	168100	65360	3	3	3	3	3	3
FALSE	High	[K].KINSWVESQTNGK.[I]	3xTMT6plex [N-Term; K1; K13]		FALSE	0.000375271	0	1	1	1	G3X9V8	G3X9V8 [143-155]	1	2178.25	High	High	High	High	High	High	High	High	High	High
FALSE	High	[K].KINSWVESQTNGK.[I]	3xTMT6plex [N-Term; K1; K13]; 1xDeamidated [N/Q]		FALSE	0.00103459	0	1	1	3	G3X9V8	G3X9V8 [143-155]	1	2179.23	High	High	High	High	High	High	High	High	High	High
FALSE	High	[K].AANSIYGAK.[G]	2xTMT6plex [N-Term; K9]; 1xDeamidated [N3]		FALSE	0.0142951	0.00117917	1	3	5	G3X9V8	G3X9V8 [100-108]	0	1353.78	High	High	High	High	High	High	High	High	High	High	0.226	0.387	0.299	0.863	2.386	0.579	0.988	0.885	1.029	409900	701900	542500	1565000	1813000	4326000	1049000	1790000	1604000	1865000	4	4	4	4	4	4
FALSE	High	[K].AANSIYGAK.[G]	2xTMT6plex [N-Term; K9]		FALSE	0.0121825	0.00117917	1	3	4	G3X9V8	G3X9V8 [100-108]	0	1352.79	High	High	High	High	High	High	High	High	High	High
FALSE	High	[K].SNDAYDLK.[A]	2xTMT6plex [N-Term; K8]		FALSE	0.0446202	0.00171593	1	1	8	G3X9V8	G3X9V8 [92-99]	0	1383.75	High	High	High	High	High	High	High	High	High	High	0.5	0.53	0.503	0.912	1.702	0.976	1.225	1.303	1.353	723300	766300	728400	1319000	1447000	2462000	1413000	1772000	1886000	1958000	3	3	3	3	3	3
FALSE	High	[K].IVEIPYK.[G]	2xTMT6plex [N-Term; K7]		FALSE	0.160442	0.00250807	1	2	3	G3X9V8	G3X9V8 [228-234]	0	1319.83	High	High	High	High	High	High	High	High	High	High	0.167	0.28	0.31	0.983	2.332	0.671	1.233	1.988	2.098	152900	257000	284600	901400	916900	2139000	614800	1131000	1823000	1924000	1	1	1	1	1	1
FALSE	High	[K].LMTQLNK.[S]	2xTMT6plex [N-Term; K7]		FALSE	0.180112	0.00572593	1	1	4	G3X9V8	G3X9V8 [85-91]	0	1305.8	High	High	High	High	High	High	High	High	High	High	0.431	0.617	0.372	0.843	2.286	0.989	1.449	1.703	1.632	570600	817500	493500	1117000	1325000	3029000	1311000	1920000	2256000	2163000	4	4	4	4	4	4
High	Master Protein	Q7TPZ8	Carboxypeptidase A1 OS=Mus musculus GN=Cpa1 PE=2 SV=1	FALSE	0	52.678	29.1169	9	50	9	1	419	47.355	5.67	High	High	High	High	High	High	High	High	High	High		109697	ENSMUSG00000054446	Cpa1	6	metabolic process	extracellular	catalytic activity;metal ion binding	Pf00246, Pf02244	0.122	0.17	0.141	0.686	0.909	0.169	0.209	0.243	0.289	3085000	4298000	3547000	17290000	25210000	22920000	4262000
Checked	Confidence	Annotated Sequence	Modifications	Modifications in Master Proteins	Contaminant	Qvality PEP	Qvality q-value	# Protein Groups	# Proteins	# PSMs	Master Protein Accessions	Positions in Master Proteins	# Missed Cleavages	Theo. MH+ [Da]	Found in Sample: [S1] F1: 126, Sample	Found in Sample: [S2] F1: 127N, Sample	Found in Sample: [S3] F1: 127C, Sample	Found in Sample: [S4] F1: 128N, Sample	Found in Sample: [S5] F1: 128C, Control	Found in Sample: [S6] F1: 129N, Sample	Found in Sample: [S7] F1: 129C, Sample	Found in Sample: [S8] F1: 130N, Sample	Found in Sample: [S9] F1: 130C, Sample	Found in Sample: [S10] F1: 131, Sample	Abundance Ratio: (F1, 126) / (F1, 128C)	Abundance Ratio: (F1, 127N) / (F1, 128C)	Abundance Ratio: (F1, 127C) / (F1, 128C)	Abundance Ratio: (F1, 128N) / (F1, 128C)	Abundance Ratio: (F1, 129N) / (F1, 128C)	Abundance Ratio: (F1, 129C) / (F1, 128C)	Abundance Ratio: (F1, 130N) / (F1, 128C)	Abundance Ratio: (F1, 130C) / (F1, 128C)	Abundance Ratio: (F1, 131) / (F1, 128C)	Abundance: F1: 126, Sample	Abundance: F1: 127N, Sample	Abundance: F1: 127C, Sample	Abundance: F1: 128N, Sample	Abundance: F1: 128C, Control	Abundance: F1: 129N, Sample	Abundance: F1: 129C, Sample	Abundance: F1: 130N, Sample	Abundance: F1: 130C, Sample	Abundance: F1: 131, Sample	Abundances Count: F1: 126, Sample	Abundances Count: F1: 127N, Sample	Abundances Count: F1: 127C, Sample	Abundances Count: F1: 128N, Sample	Abundances Count: F1: 128C, Control	Abundances Count: F1: 129N, Sample
FALSE	High	[K].FSTGGTNRPAIWIDTGIHSR.[E]	1xTMT6plex [N-Term]		FALSE	0.000603604	0	1	1	5	Q7TPZ8	Q7TPZ8 [162-181]	0	2415.27	High	High	High	High	High	High	High	High	High	High	0.393	0.536	0.482	0.833	2.049	0.66	1.735	1.92	3.215	133900	182600	164200	283500	340400	697600	224600	590600	653600	1094000	2	2	2	2	2	2
FALSE	High	[R].EWVTQASGVWFAK.[K]	2xTMT6plex [N-Term; K13]		FALSE	0.00115749	0	1	1	1	Q7TPZ8	Q7TPZ8 [182-194]	0	1967.08	High	High	High	High	High	High	High	High	High	High
FALSE	High	[K].IQIGSTFEGRPINVLK.[F]	2xTMT6plex [N-Term; K16]		FALSE	0.000952833	0	1	1	3	Q7TPZ8	Q7TPZ8 [146-161]	0	2230.33	High	High	High	High	High	High	High	High	High	High	0.859	1	1.443	9.964	1.59	1.222	0.765	1.4	0.949	59560	69290	100100	690700	69320	110200	84690	53020	97010	65770	1	1	1	1	1	1
FALSE	High	[K].SIVDFVTSHGNIK.[A]	2xTMT6plex [N-Term; K13]		FALSE	3.72754e-05	0	1	1	19	Q7TPZ8	Q7TPZ8 [288-300]	0	1875.07	High	High	High	High	High	High	High	High	High	High	0.121	0.184	0.142	0.771	0.835	0.193	0.177	0.236	0.246	940100	1431000	1105000	6002000	7783000	6501000	1505000	1374000	1834000	1916000	18	18	18	18	18	18
FALSE	High	[R].NWDAAFGMPGASSNPCSETYR.[G]	1xTMT6plex [N-Term]; 1xCarbamidomethyl [C16]		FALSE	0.000148892	0	1	1	3	Q7TPZ8	Q7TPZ8 [256-276]	0	2547.12	High	High	High	High	High	High	High	High	High	High	0.352	0.516	0.478	0.927	1.212	0.54	0.597	0.781	0.74	43680	64010	59230	115000	124000	150300	66910	74080	96890	91770	1	1	1	1	1	1
FALSE	High	[R].SHTEGSLCVGVDPNR.[N]	1xTMT6plex [N-Term]; 1xCarbamidomethyl [C8]		FALSE	0.000596866	0	1	1	1	Q7TPZ8	Q7TPZ8 [241-255]	0	1856.91	High	High	High	High	High	High	High	High	High	High
FALSE	High	[K].SAVTALTSLHGTK.[F]	2xTMT6plex [N-Term; K13]		FALSE	0.000362842	0	1	1	3	Q7TPZ8	Q7TPZ8 [335-347]	0	1744.04	High	High	High	High	High	High	High	High	High	High
FALSE	High	[R].GKFPNSEVEVK.[S]	3xTMT6plex [N-Term; K2; K11]		FALSE	0.00299372	0	1	1	11	Q7TPZ8	Q7TPZ8 [277-287]	1	1921.14	High	High	High	High	High	High	High	High	High	High	0.103	0.12	0.073	0.631	0.868	0.129	0.161	0.189	0.222	1484000	1733000	1051000	9122000	14470000	12560000	1865000	2329000	2733000	3206000	6	6	6	6	6	6
FALSE	High	[R].GKFPNSEVEVK.[S]	3xTMT6plex [N-Term; K2; K11]; 1xDeamidated [N5]		FALSE	0.0331391	0.00171593	1	1	1	Q7TPZ8	Q7TPZ8 [277-287]	1	1922.12	High	High	High	High	High	High	High	High	High	High	0.095	0.166	0.091	0.6	0.94	0.189	0.245	0.232	0.283	89530	156900	86520	567200	945700	888800	178500	232100	219800	268000	1	1	1	1	1	1
FALSE	High	[K].FPNSEVEVK.[S]	2xTMT6plex [N-Term; K9]		FALSE	0.0603612	0.00171593	1	1	2	Q7TPZ8	Q7TPZ8 [279-287]	0	1506.86	High	High	High	High	High	High	High	High	High	High	0.226	0.446	0.662	0.344	1.356	0.228	0.417	0.337	0.438	334500	661200	981000	510600	1482000	2010000	337400	617900	500000	649600	2	2	2	2	2	2
FALSE	High	[K].SIVDFVTSHGNIK.[A]	2xTMT6plex [N-Term; K13]; 1xDeamidated [N11]		FALSE	0.153457	0.00250807	1	1	1	Q7TPZ8	Q7TPZ8 [288-300]	0	1876.06	High	High	High	High	High	High	High	High	High	High
High	Master Protein	B2RU69	CUB and zona pellucida-like domain-containing protein 1 OS=Mus musculus GN=Cuzd1 PE=2 SV=1	FALSE	0	52.064	12.1911	6	62	6	1	607	68.151	7.03	High	High	High	High	High	High	High	High	High	High		16433	ENSMUSG00000040205	Cuzd1	7	cell division;metabolic process;regulation of biological process;response to stimulus	membrane		Pf00100, Pf00431	0.368	0.759	0.453	0.94	1.405	1.391	1.301	2.702	1.993	3877000	7988000	4764000	9897000	10520000	14780000	14640000
Checked	Confidence	Annotated Sequence	Modifications	Modifications in Master Proteins	Contaminant	Qvality PEP	Qvality q-value	# Protein Groups	# Proteins	# PSMs	Master Protein Accessions	Positions in Master Proteins	# Missed Cleavages	Theo. MH+ [Da]	Found in Sample: [S1] F1: 126, Sample	Found in Sample: [S2] F1: 127N, Sample	Found in Sample: [S3] F1: 127C, Sample	Found in Sample: [S4] F1: 128N, Sample	Found in Sample: [S5] F1: 128C, Control	Found in Sample: [S6] F1: 129N, Sample	Found in Sample: [S7] F1: 129C, Sample	Found in Sample: [S8] F1: 130N, Sample	Found in Sample: [S9] F1: 130C, Sample	Found in Sample: [S10] F1: 131, Sample	Abundance Ratio: (F1, 126) / (F1, 128C)	Abundance Ratio: (F1, 127N) / (F1, 128C)	Abundance Ratio: (F1, 127C) / (F1, 128C)	Abundance Ratio: (F1, 128N) / (F1, 128C)	Abundance Ratio: (F1, 129N) / (F1, 128C)	Abundance Ratio: (F1, 129C) / (F1, 128C)	Abundance Ratio: (F1, 130N) / (F1, 128C)	Abundance Ratio: (F1, 130C) / (F1, 128C)	Abundance Ratio: (F1, 131) / (F1, 128C)	Abundance: F1: 126, Sample	Abundance: F1: 127N, Sample	Abundance: F1: 127C, Sample	Abundance: F1: 128N, Sample	Abundance: F1: 128C, Control	Abundance: F1: 129N, Sample	Abundance: F1: 129C, Sample	Abundance: F1: 130N, Sample	Abundance: F1: 130C, Sample	Abundance: F1: 131, Sample	Abundances Count: F1: 126, Sample	Abundances Count: F1: 127N, Sample	Abundances Count: F1: 127C, Sample	Abundances Count: F1: 128N, Sample	Abundances Count: F1: 128C, Control	Abundances Count: F1: 129N, Sample
FALSE	High	[K].VFDGSSTSGPLLGK.[A]	2xTMT6plex [N-Term; K14]		FALSE	7.45471e-06	0	1	2	13	B2RU69	B2RU69 [92-105]	0	1823.03	High	High	High	High	High	High	High	High	High	High	0.256	0.473	0.369	1.198	1.424	1.385	1.589	3.503	2.821	788200	1456000	1135000	3687000	3076000	4382000	4260000	4887000	10780000	8679000	11	11	11	11	11	11
FALSE	High	[K].FTDLLLEMDENCK.[F]	2xTMT6plex [N-Term; K13]; 1xCarbamidomethyl [C12]		FALSE	2.91162e-05	0	1	2	17	B2RU69	B2RU69 [196-208]	0	2086.06	High	High	High	High	High	High	High	High	High	High	0.214	0.508	0.267	0.442	1.302	1.007	1.374	1.823	1.717	823400	1952000	1025000	1699000	3843000	5003000	3871000	5281000	7004000	6600000	16	16	16	16	16	16
FALSE	High	[K].FTDLLLEMDENCK.[F]	2xTMT6plex [N-Term; K13]; 1xDeamidated [N11]; 1xCarbamidomethyl [C12]		FALSE	0.00412924	0	1	2	1	B2RU69	B2RU69 [196-208]	0	2087.04	High	High	High	High	High	High	High	High	High	High
FALSE	High	[K].FTDLLLEMDENCK.[F]	2xTMT6plex [N-Term; K13]; 1xCarbamidomethyl [C12]; 1xOxidation [M8]		FALSE	0.00468876	0	1	2	10	B2RU69	B2RU69 [196-208]	0	2102.05	High	High	High	High	High	High	High	High	High	High	0.4	0.662	0.583	0.659	1.284	0.987	1.352	1.654	1.531	240400	397600	350200	396000	600500	771300	593000	811700	993100	919300	5	5	5	5	5	5
FALSE	High	[R].CTASLGGANLGETHK.[A]	2xTMT6plex [N-Term; K15]; 1xCarbamidomethyl [C1]		FALSE	6.39415e-06	0	1	2	6	B2RU69	B2RU69 [32-46]	0	1974.05	High	High	High	High	High	High	High	High	High	High	0.498	0.908	0.451	0.858	1.819	1.056	1.242	2.121	1.616	494300	901100	448000	852000	992900	1806000	1048000	1233000	2106000	1604000	3	3	3	3	3	3
FALSE	High	[K].FDFIAVYDGPSTTAGLLK.[Q]	2xTMT6plex [N-Term; K18]		FALSE	4.78999e-05	0	1	2	7	B2RU69	B2RU69 [209-226]	0	2373.31	High	High	High	High	High	High	High	High	High	High	1.103	2.177	2.332	5.336	1.238	3.36	0.838	3.279	1.123	98090	193700	207400	474600	88960	110100	298900	74510	291700	99930	4	4	4	4	4	4
FALSE	High	[R].IIFSYIK.[L]	2xTMT6plex [N-Term; K7]		FALSE	0.136493	0.00171593	1	2	5	B2RU69	B2RU69 [72-78]	0	1341.85	High	High	High	High	High	High	High	High	High	High	0.633	1.675	0.734	2.11	1.491	3.505	0.71	5.574	2.125	743500	1968000	862200	2479000	1175000	1752000	4118000	834700	6548000	2496000	4	4	4	4	4	4
FALSE	High	[R].FQFNAFK.[F]	2xTMT6plex [N-Term; K7]		FALSE	0.188834	0.00804114	1	2	3	B2RU69	B2RU69 [480-486]	0	1359.78	High	High	High	High	High	High	High	High	High	High	0.921	1.497	0.983	0.415	1.282	0.599	0.767	0.953	0.774	688900	1120000	735500	310600	748100	959000	448300	574000	713300	578900	2	2	2	2	2	2
High	Master Protein	125105	*CON* Keratin, type ii cytoskeletal 5 (cytokeratin 5) (k5) (CK 5) (58 kd cytokeratin) gi88051pirA29904 keratin K5, 58K type II, epidermal (version 1) - human gi307082 (M21389) keratin type II [Homo sapiens]	TRUE	0	51.0623	19.322	14	61	1	1	590	62.423	8.06	High	High	High	High	High	High	High	High	High	High		3852		KRT5	12	cell organization and biogenesis;transport	cytoplasm;cytosol;membrane;mitochondrion;nucleus	catalytic activity;motor activity;protein binding;structural molecule activity	Pf00038, Pf01576, Pf02994, Pf03961, Pf04111, Pf05957, Pf12128	0.771	0.6	1.273	0.583	0.844	0.742	0.824	1.306	0.86	141300	110000	233300	106900	183300	154700	135900
Checked	Confidence	Annotated Sequence	Modifications	Modifications in Master Proteins	Contaminant	Qvality PEP	Qvality q-value	# Protein Groups	# Proteins	# PSMs	Master Protein Accessions	Positions in Master Proteins	# Missed Cleavages	Theo. MH+ [Da]	Found in Sample: [S1] F1: 126, Sample	Found in Sample: [S2] F1: 127N, Sample	Found in Sample: [S3] F1: 127C, Sample	Found in Sample: [S4] F1: 128N, Sample	Found in Sample: [S5] F1: 128C, Control	Found in Sample: [S6] F1: 129N, Sample	Found in Sample: [S7] F1: 129C, Sample	Found in Sample: [S8] F1: 130N, Sample	Found in Sample: [S9] F1: 130C, Sample	Found in Sample: [S10] F1: 131, Sample	Abundance Ratio: (F1, 126) / (F1, 128C)	Abundance Ratio: (F1, 127N) / (F1, 128C)	Abundance Ratio: (F1, 127C) / (F1, 128C)	Abundance Ratio: (F1, 128N) / (F1, 128C)	Abundance Ratio: (F1, 129N) / (F1, 128C)	Abundance Ratio: (F1, 129C) / (F1, 128C)	Abundance Ratio: (F1, 130N) / (F1, 128C)	Abundance Ratio: (F1, 130C) / (F1, 128C)	Abundance Ratio: (F1, 131) / (F1, 128C)	Abundance: F1: 126, Sample	Abundance: F1: 127N, Sample	Abundance: F1: 127C, Sample	Abundance: F1: 128N, Sample	Abundance: F1: 128C, Control	Abundance: F1: 129N, Sample	Abundance: F1: 129C, Sample	Abundance: F1: 130N, Sample	Abundance: F1: 130C, Sample	Abundance: F1: 131, Sample	Abundances Count: F1: 126, Sample	Abundances Count: F1: 127N, Sample	Abundances Count: F1: 127C, Sample	Abundances Count: F1: 128N, Sample	Abundances Count: F1: 128C, Control	Abundances Count: F1: 129N, Sample
FALSE	High	[K].WTLLQEQGTK.[T]	2xTMT6plex [N-Term; K10]		TRUE	0.00222776	0	3	13	6	125105; 1346344; 88052	125105 [200-209]; 1346344 [195-204]; 88052 [199-208]	0	1661.96	High	High	High	High	High	High	High	High	High	High	0.801	0.37	0.741	0.517	0.889	0.704	0.686	1.005	0.52	519900	240000	481300	335800	649300	577100	456800	445700	652400	337400	3	3	3	3	3	3
FALSE	High	[-R].QNLEPLFEQYINNLR.[R]	1xTMT6plex [N-Term]		TRUE	0.000201619	0	3	14	5	125105; 1346344; 88052	125105 [213-227]; 1346344 [208-222]; 88052 [212-226]	0	2120.13	High	High	High	High	High	High	High	High	High	High	0.767	1.218	1.276	0.701	1.508	0.938	1.491	1.735	1.747	59410	94350	98860	54340	77490	116900	72650	115500	134400	135400	4	4	4	4	4	4
FALSE	High	[K].YEELQQTAGR.[H]	1xTMT6plex [N-Term]		TRUE	0.00656204	0	2	5	3	125105; 88052	125105 [365-374]; 88052 [364-373]	0	1423.74	High	High	High	High	High	High	High	High	High	High	1.109	0.703	0.632	0.683	1.042	0.915	0.735	0.909	0.757	439000	278000	250000	270200	395700	412100	362000	290800	359800	299600	2	2	2	2	2	2
FALSE	High	[K].LALDVEIATYR.[K]	1xTMT6plex [N-Term]		TRUE	0.0022529	0	4	29	3	125105; 254622; 1346344; 88052	125105 [461-471]; 254622 [477-487]; 1346344 [456-466]; 88052 [460-470]	0	1492.86	High	High	High	High	High	High	High	High	High	High	0.932	0.701	3.658	2.091	0.878	1.68	0.664	2.009	0.816	557100	418800	2187000	1250000	597700	524600	1004000	396900	1201000	488000	2	2	2	2	2	2
FALSE	High	[R].NLDLDSIIAEVK.[A]	2xTMT6plex [N-Term; K12]		TRUE	0.000122559	0	4	19	10	125105; 254622; 1346344; 88052	125105 [332-343]; 254622 [348-359]; 1346344 [327-338]; 88052 [331-342]	0	1788.05	High	High	High	High	High	High	High	High	High	High	1.42	0.564	1.75	1.314	0.448	1.109	0.291	1.649	0.364	1886000	748600	2324000	1745000	1328000	595100	1472000	386500	2189000	483700	7	7	7	7	7	7
FALSE	High	[R].TTAENEFVMLK.[K]	2xTMT6plex [N-Term; K11]; 1xOxidation [M9]		TRUE	0.0105756	0.00117917	1	3	1	125105	125105 [266-276]	0	1756.96	High	High	High	High	High	High	High	High	High	High	0.771	0.6	1.273	0.583	0.844	0.742	0.824	1.306	0.86	141300	110000	233300	106900	183300	154700	135900	151000	239400	157600	1	1	1	1	1	1
FALSE	High	[KR].NKYEDEINK.[R]	3xTMT6plex [N-Term; K2; K9]		TRUE	0.0128338	0.00117917	3	25	7	125105; P04264; 1346344	125105 [256-264]; P04264 [268-276]; 1346344 [251-259]	1	1840.04	High	High	High	High	High	High	High	High	High	High	1.596	0.273	1.321	0.579	0.793	1.014	1.005	1.331	0.967	7240000	1240000	5996000	2628000	4537000	3600000	4603000	4558000	6041000	4389000	4	4	4	4	4	4
FALSE	High	[K].LAELEEALQK.[A]	2xTMT6plex [N-Term; K10]		TRUE	0.0103805	0.00117917	2	4	3	125105; 88052	125105 [432-441]; 88052 [431-440]	0	1601.95	High	High	High	High	High	High	High	High	High	High	1.111	0.597	1.888	0.682	0.679	0.901	0.509	1.067	0.553	266100	142800	452000	163300	239400	162500	215800	121900	255500	132300	2	2	2	2	2	2
FALSE	High	[KR-].YEDEINK.[R]	2xTMT6plex [N-Term; K7]		TRUE	0.112298	0.00171593	4	40	4	125105; 254622; P04264; 1346344	125105 [258-264]; 254622 [274-280]; P04264 [270-276]; 1346344 [253-259]	0	1368.74	High	High	High	High	High	High	High	High	High	High	1.444	0.29	1.128	0.499	0.647	0.596	0.618	1.063	0.411	2672000	536200	2087000	923000	1851000	1197000	1103000	1143000	1967000	760700	1	1	1	1	1	1
FALSE	High	[R].QLDSIVGER.[G]	1xTMT6plex [N-Term]		TRUE	0.120018	0.00171593	3	12	2	125105; 1346344; 88052	125105 [229-237]; 1346344 [224-232]; 88052 [228-236]	0	1245.7	High	High	High	High	High	High	High	High	High	High	0.615	0.725	0.874	0.456	1.195	0.665	1.047	0.974	0.816	463500	546400	658600	343900	753900	900700	501200	789400	734600	614900	1	1	1	1	1	1
FALSE	High	[R].KLLEGEECR.[LMI]	2xTMT6plex [N-Term; K1]; 1xCarbamidomethyl [C8]		TRUE	0.0880029	0.00171593	4	31	5	125105; 254622; 1346344; 88052	125105 [472-480]; 254622 [488-496]; 1346344 [467-475]; 88052 [471-479]	1	1591.89	High	High	High	High	High	High	High	High	High	High
FALSE	High	[KR].NKYEDEINKR.[T]	3xTMT6plex [N-Term; K2; K9]		TRUE	0.0233284	0.00171593	3	25	5	125105; P04264; 1346344	125105 [256-265]; P04264 [268-277]; 1346344 [251-260]	2	1996.14	High	High	High	High	High	High	High	High	High	High	0.744	0.168	0.982	0.579	0.564	0.712	0.537	0.949	0.297	6064000	1368000	8005000	4720000	8153000	4598000	5807000	4378000	7736000	2417000	3	3	3	3	3	3
FALSE	High	[KR-].YEDEINKR.[TYA]	2xTMT6plex [N-Term; K7]		TRUE	0.187565	0.00804114	4	40	2	125105; 254622; P04264; 1346344	125105 [258-265]; 254622 [274-281]; P04264 [270-277]; 1346344 [253-260]	1	1524.84	High	High	High	High	High	High	High	High	High	High	2.588	1.691	0.972	0.648	1.196	0.791	0.83	1.437	0.666	1171000	764900	439900	293300	452400	541100	357800	375300	650100	301400	1	1	1	1	1	1
FALSE	High	[R].FLEQQNK.[LAVIM]	2xTMT6plex [N-Term; K7]		TRUE	0.186933	0.00804114	6	62	5	125105; 1346344; 88052; 1903218; 2190400; 1903220	125105 [188-194]; 1346344 [183-189]; 88052 [187-193]; 1903218 [143-149]; 2190400 [126-132]; 1903220 [123-129]	0	1364.79	High	High	High	High	High	High	High	High	High	High
High	Master Protein	Q792Y9	MCG140783 OS=Mus musculus GN=Gm5771 PE=2 SV=1	FALSE	0	50.5427	25.7143	3	76	3	1	245	25.976	5.33	High	High	High	High	High	High	High	High	High	High	Phospho [T241]	436523	ENSMUSG00000058119	Gm5771	6	metabolic process		catalytic activity	Pf00089	2.201	3.459	1.054	1.046	0.778	0.507	0.496	0.984	0.946	7578000	11910000	3628000	3602000	3443000	2679000	1746000
Checked	Confidence	Annotated Sequence	Modifications	Modifications in Master Proteins	Contaminant	Qvality PEP	Qvality q-value	# Protein Groups	# Proteins	# PSMs	Master Protein Accessions	Positions in Master Proteins	# Missed Cleavages	Theo. MH+ [Da]	Found in Sample: [S1] F1: 126, Sample	Found in Sample: [S2] F1: 127N, Sample	Found in Sample: [S3] F1: 127C, Sample	Found in Sample: [S4] F1: 128N, Sample	Found in Sample: [S5] F1: 128C, Control	Found in Sample: [S6] F1: 129N, Sample	Found in Sample: [S7] F1: 129C, Sample	Found in Sample: [S8] F1: 130N, Sample	Found in Sample: [S9] F1: 130C, Sample	Found in Sample: [S10] F1: 131, Sample	Abundance Ratio: (F1, 126) / (F1, 128C)	Abundance Ratio: (F1, 127N) / (F1, 128C)	Abundance Ratio: (F1, 127C) / (F1, 128C)	Abundance Ratio: (F1, 128N) / (F1, 128C)	Abundance Ratio: (F1, 129N) / (F1, 128C)	Abundance Ratio: (F1, 129C) / (F1, 128C)	Abundance Ratio: (F1, 130N) / (F1, 128C)	Abundance Ratio: (F1, 130C) / (F1, 128C)	Abundance Ratio: (F1, 131) / (F1, 128C)	Abundance: F1: 126, Sample	Abundance: F1: 127N, Sample	Abundance: F1: 127C, Sample	Abundance: F1: 128N, Sample	Abundance: F1: 128C, Control	Abundance: F1: 129N, Sample	Abundance: F1: 129C, Sample	Abundance: F1: 130N, Sample	Abundance: F1: 130C, Sample	Abundance: F1: 131, Sample	Abundances Count: F1: 126, Sample	Abundances Count: F1: 127N, Sample	Abundances Count: F1: 127C, Sample	Abundances Count: F1: 128N, Sample	Abundances Count: F1: 128C, Control	Abundances Count: F1: 129N, Sample
FALSE	High	[K].DSCQGDSGGPVVCNGELQGIVSWGYGCALADNPGVYTK.[V]	2xTMT6plex [N-Term; K38]; 2xDeamidated [N14; N32]; 3xCarbamidomethyl [C3; C13; C27]		FALSE	0.000124874	0	1	1	4	Q792Y9	Q792Y9 [193-230]	0	4448.05	High	High	High	High	High	High	High	High	High	High	0.388	0.561	0.664	0.743	0.86	0.562	0.792	2.744	2.018	19360	28000	33150	37080	49910	42920	28060	39510	137000	100700	3	3	3	3	3	3
FALSE	High	[K].DSCQGDSGGPVVCNGELQGIVSWGYGCALADNPGVYTK.[V]	2xTMT6plex [N-Term; K38]; 1xDeamidated [Q/N]; 3xCarbamidomethyl [C3; C13; C27]		FALSE	1.72408e-05	0	1	1	36	Q792Y9	Q792Y9 [193-230]	0	4447.07	High	High	High	High	High	High	High	High	High	High	0.49	0.502	0.513	0.656	0.901	0.624	0.75	2.607	2.269	89460	91520	93540	119600	182400	164400	113900	136800	475500	413900	7	8	8	8	8	8
FALSE	High	[KR].TLNNDIMLIK.[L]	2xTMT6plex [N-Term; K10]		FALSE	0.00222776	0	1	6	14	Q792Y9	Q792Y9 [102-111]	0	1632.98	High	High	High	High	High	High	High	High	High	High	5.774	9.531	2.445	1.908	1.201	0.639	0.73	1.16	1.112	4321000	7133000	1830000	1428000	748400	898800	478500	546400	868300	832100	4	4	4	4	4	4
FALSE	High	[KR].TLNNDIMLIK.[L]	2xTMT6plex [N-Term; K10]; 1xDeamidated [N3]		FALSE	0.00236518	0	1	6	22	Q792Y9	Q792Y9 [102-111]	0	1633.96	High	High	High	High	High	High	High	High	High	High	1.002	1.6	0.53	0.702	0.663	0.373	0.364	0.765	0.764	1629000	2601000	861300	1141000	1625000	1077000	606600	591700	1244000	1242000	6	6	6	6	6	6
FALSE	High	[KR].TLNNDIMLLK.[L]	2xTMT6plex [N-Term; K10]; 2xDeamidated [N3; N4]		FALSE	0.007097	0	1	6	2	Q792Y9	Q792Y9 [102-111]	0	1634.94	High	High	High	High	High	High	High	High	High	High
FALSE	High	[K].DSCQGDSGGPVVCNGELQGIVSWGYGCALADNPGVYTK.[V]	2xTMT6plex [N-Term; K38]; 3xDeamidated [Q4; N32; Q/N]; 3xCarbamidomethyl [C3; C13; C27]		FALSE	0.101405	0.00171593	1	1	5	Q792Y9	Q792Y9 [193-230]	0	4449.04	High	High	High	High	High	High	High	High	High	High	0.251	0.236	0.311	0.915	1.118	0.692	0.874	3.087	2.979	3905	3673	4839	14240	15570	17400	10770	13610	48040	46360	1	1	1	1	1	1
FALSE	High	[K].VCNYVDWIQDTIAAN.[-]	1xTMT6plex [N-Term]; 1xCarbamidomethyl [C2]		FALSE	0.0245694	0.00171593	1	5	1	Q792Y9	Q792Y9 [231-245]	0	2010.98	High	High	High	High	High	High	High	High	High	High	2.406	3.446	2.007	1.757	1.175	1.048	0.926	1.781	1.792	31800	45540	26520	23210	13220	15530	13850	12230	23540	23690	1	1	1	1	1	1
FALSE	High	[KR].TLNNDIMLLK.[L]	2xTMT6plex [N-Term; K10]; 1xDeamidated [N3]; 1xOxidation [M7]		FALSE	0.0895816	0.00171593	1	6	4	Q792Y9	Q792Y9 [102-111]	0	1649.95	High	High	High	High	High	High	High	High	High	High	0.973	1.634	0.421	0.684	0.492	0.6	0.398	0.694	0.646	698800	1173000	302700	491400	718100	353600	430700	285700	498500	464200	1	1	1	1	1	1
FALSE	High	[K].VCNYVDWIQDTIAAN.[-]	1xTMT6plex [N-Term]; 1xDeamidated [N/Q]; 1xPhospho [T11]; 1xCarbamidomethyl [C2]	Q792Y9 1xPhospho [T241]	FALSE	0.147259	0.00250807	1	5	9	Q792Y9	Q792Y9 [231-245]	0	2091.93	High	High	High	High	High	High	High	High	High	High	8.676	9.208	5.27	3.85	1.206	0.71	0.891	1.038	1.502	784000	832100	476300	347900	90370	109000	64160	80520	93800	135700	5	5	5	5	5	5
High	Master Protein	Q14525	*CON* Keratin, type I cuticular Ha3-II OS=Homo sapiens GN=KRT33B PE=2 SV=3	TRUE	0	48.8119	39.3564	12	40	4	1	404	46.185	4.84	High	High	High	High	High	High	High	High	High	High		3884	ENSG00000263012; ENSG00000131738	KRT33B	CHR_HSCHR17_1_CTG4; 17	transport	membrane	catalytic activity;motor activity;protein binding;structural molecule activity	Pf00038, Pf00529, Pf01576, Pf04156, Pf13514, Pf14362	0.548	0.824	0.611	5.315	1.579	0.576	1.426	0.693	0.952	121600	182600	135500	1178000	221700	350100	127800
Checked	Confidence	Annotated Sequence	Modifications	Modifications in Master Proteins	Contaminant	Qvality PEP	Qvality q-value	# Protein Groups	# Proteins	# PSMs	Master Protein Accessions	Positions in Master Proteins	# Missed Cleavages	Theo. MH+ [Da]	Found in Sample: [S1] F1: 126, Sample	Found in Sample: [S2] F1: 127N, Sample	Found in Sample: [S3] F1: 127C, Sample	Found in Sample: [S4] F1: 128N, Sample	Found in Sample: [S5] F1: 128C, Control	Found in Sample: [S6] F1: 129N, Sample	Found in Sample: [S7] F1: 129C, Sample	Found in Sample: [S8] F1: 130N, Sample	Found in Sample: [S9] F1: 130C, Sample	Found in Sample: [S10] F1: 131, Sample	Abundance Ratio: (F1, 126) / (F1, 128C)	Abundance Ratio: (F1, 127N) / (F1, 128C)	Abundance Ratio: (F1, 127C) / (F1, 128C)	Abundance Ratio: (F1, 128N) / (F1, 128C)	Abundance Ratio: (F1, 129N) / (F1, 128C)	Abundance Ratio: (F1, 129C) / (F1, 128C)	Abundance Ratio: (F1, 130N) / (F1, 128C)	Abundance Ratio: (F1, 130C) / (F1, 128C)	Abundance Ratio: (F1, 131) / (F1, 128C)	Abundance: F1: 126, Sample	Abundance: F1: 127N, Sample	Abundance: F1: 127C, Sample	Abundance: F1: 128N, Sample	Abundance: F1: 128C, Control	Abundance: F1: 129N, Sample	Abundance: F1: 129C, Sample	Abundance: F1: 130N, Sample	Abundance: F1: 130C, Sample	Abundance: F1: 131, Sample	Abundances Count: F1: 126, Sample	Abundances Count: F1: 127N, Sample	Abundances Count: F1: 127C, Sample	Abundances Count: F1: 128N, Sample	Abundances Count: F1: 128C, Control	Abundances Count: F1: 129N, Sample
FALSE	High	[R].DNAELENLIR.[E]	1xTMT6plex [N-Term]		TRUE	0.00358237	0	2	4	6	2135530; Q14525	2135530 [80-89]; Q14525 [80-89]	0	1415.77	High	High	High	High	High	High	High	High	High	High	0.64	1.078	0.63	5.511	1.572	0.439	1.045	0.869	1.133	971400	1635000	956400	8359000	1517000	2384000	666000	1585000	1318000	1719000	4	4	4	4	4	4
FALSE	High	[R].QNQEYQVLLDVR.[A]	1xTMT6plex [N-Term]		TRUE	0.000541528	0	2	16	4	2135530; Q14525	2135530 [335-346]; Q14525 [335-346]	0	1733.94	High	High	High	High	High	High	High	High	High	High	0.563	1.421	0.856	7.578	1.916	0.754	0.893	1.232	1.231	193400	488300	294100	2605000	343700	658500	259300	307000	423600	423000	3	3	3	3	3	3
FALSE	High	[R].EVEQWFATQTEELNK.[Q]	2xTMT6plex [N-Term; K15]		TRUE	0.000640848	0	1	3	4	Q14525	Q14525 [242-256]	0	2310.2	High	High	High	High	High	High	High	High	High	High	0.393	0.622	0.464	4.517	1.485	0.505	1.553	0.467	0.78	64330	101800	75860	738700	163500	242900	82630	253900	76380	127600	1	1	1	1	1	1
FALSE	High	[R].TVNALEIELQAQHNLR.[DY]	1xTMT6plex [N-Term]		TRUE	5.54282e-05	0	2	5	3	2135530; Q14525	2135530 [278-293]; Q14525 [278-293]	0	2078.16	High	High	High	High	High	High	High	High	High	High	1.095	2.506	0.936	2.071	1.42	0.984	1.523	1.317	1.241	234800	537500	200700	444100	214500	304600	211000	326600	282500	266100	2	2	2	2	2	2
FALSE	High	[R].YSSQLSQVQSLITNVESQLAEIR.[S]	1xTMT6plex [N-Term]		TRUE	5.59169e-07	0	2	3	4	2135530; Q14525	2135530 [307-329]; Q14525 [307-329]	0	2822.51	High	High	High	High	High	High	High	High	High	High	0.728	1.618	0.907	2.731	1.581	1.427	0.883	3.235	5.693	27480	61070	34240	103100	37740	59650	53860	33320	122100	214800	2	2	2	2	2	2
FALSE	High	[R].SDLEAQMESLKEELLSLK.[Q]	3xTMT6plex [N-Term; K11; K18]		TRUE	0.00383177	0	1	2	3	Q14525	Q14525 [174-191]	1	2750.55	High	High	High	High	High	High	High	High	High	High	1.066	1.317	1.214	18.92	2.242	0.652	1.056	1.139	1.589	22290	27540	25390	395500	20910	46870	13620	22080	23810	33220	3	3	3	3	3	3
FALSE	High	[R].NQYEALVETNR.[R]	1xTMT6plex [N-Term]		TRUE	0.0045848	0	1	2	1	Q14525	Q14525 [230-240]	0	1565.81	High	High	High	High	High	High	High	High	High	High
FALSE	High	[R].LNVEVDAAPAVDLNQVLNETR.[N]	1xTMT6plex [N-Term]		TRUE	0.00758996	0	1	2	1	Q14525	Q14525 [209-229]	0	2509.35	High	High	High	High	High	High	High	High	High	High	0.91	1.352	1.075	1.067	1.467	0.965	1.263	1.372	1.266	17510	26020	20690	20530	19250	28230	18570	24320	26410	24370	1	1	1	1	1	1
FALSE	High	[R].LNVEVDAAPAVDLNQVLNETR.[N]	1xTMT6plex [N-Term]; 1xDeamidated [Q/N]		TRUE	0.0533541	0.00171593	1	2	2	Q14525	Q14525 [209-229]	0	2510.33	High	High	High	High	High	High	High	High	High	High	0.968	1.513	0.752	1.313	1.783	0.72	0.882	1.497	1.434	17420	27240	13540	23640	18000	32090	12970	15880	26950	25810	1	1	1	1	1	1
FALSE	High	[KR].ETMQFLNDR.[L]	1xTMT6plex [N-Term]		TRUE	0.0200404	0.00171593	2	18	2	2135530; Q14525	2135530 [58-66]; Q14525 [58-66]	0	1382.69	High	High	High	High	High	High	High	High	High	High	0.443	0.805	0.708	5.678	1.865	0.634	1.413	0.981	1.583	59900	108800	95760	768000	135300	252300	85760	191100	132600	214100	1	1	1	1	1	1
FALSE	High	[KR].TIEELQQK.[I]	2xTMT6plex [N-Term; K8]		TRUE	0.0457772	0.00171593	2	12	4	2135530; Q14525	2135530 [109-116]; Q14525 [109-116]	0	1446.86	High	High	High	High	High	High	High	High	High	High	0.712	1.738	0.635	6.997	1.804	0.83	1.374	1.032	1.34	241200	588400	215200	2369000	338600	610900	281100	465100	349400	453500	2	2	2	2	2	2
FALSE	High	[R].LECEINTYR.[SG]	1xTMT6plex [N-Term]; 1xCarbamidomethyl [C3]		TRUE	0.0368722	0.00171593	2	20	2	2135530; Q14525	2135530 [349-357]; Q14525 [349-357]	0	1426.72	High	High	High	High	High	High	High	High	High	High	0.954	1.602	1.139	10.431	2.054	0.867	1.589	1.557	2.225	102500	172100	122400	1120000	107400	220600	93130	170600	167200	238900	1	1	1	1	1	1
FALSE	High	[R].LASYLEK.[V]	2xTMT6plex [N-Term; K7]		TRUE	0.156645	0.00250807	2	15	4	2135530; Q14525	2135530 [67-73]; Q14525 [67-73]	0	1281.78	High	High	High	High	High	High	High	High	High	High	100	100	100	100	100	100	100	100	100	192100	331200	1216000	24350000		2704000	673900	817500	920800	745900	1	1	1	1		1
High	Master Protein	2135530	S60034 *CON* keratin Ha1, type I, hair - human gi1134842 (X86570) type I keratin [Homo sapiens]	TRUE	0	48.648	38.9423	13	45	5	1	416	47.319	5	High	High	High	High	High	High	High	High	High	High								catalytic activity;motor activity	Pf00038, Pf01576, Pf04156, Pf13514, Pf14362, Pf14643	0.606	1.127	0.877	10.579	2.019	0.936	1.742	1.607	2.055	291400	541800	421400	5085000	480700	970700	450200
Checked	Confidence	Annotated Sequence	Modifications	Modifications in Master Proteins	Contaminant	Qvality PEP	Qvality q-value	# Protein Groups	# Proteins	# PSMs	Master Protein Accessions	Positions in Master Proteins	# Missed Cleavages	Theo. MH+ [Da]	Found in Sample: [S1] F1: 126, Sample	Found in Sample: [S2] F1: 127N, Sample	Found in Sample: [S3] F1: 127C, Sample	Found in Sample: [S4] F1: 128N, Sample	Found in Sample: [S5] F1: 128C, Control	Found in Sample: [S6] F1: 129N, Sample	Found in Sample: [S7] F1: 129C, Sample	Found in Sample: [S8] F1: 130N, Sample	Found in Sample: [S9] F1: 130C, Sample	Found in Sample: [S10] F1: 131, Sample	Abundance Ratio: (F1, 126) / (F1, 128C)	Abundance Ratio: (F1, 127N) / (F1, 128C)	Abundance Ratio: (F1, 127C) / (F1, 128C)	Abundance Ratio: (F1, 128N) / (F1, 128C)	Abundance Ratio: (F1, 129N) / (F1, 128C)	Abundance Ratio: (F1, 129C) / (F1, 128C)	Abundance Ratio: (F1, 130N) / (F1, 128C)	Abundance Ratio: (F1, 130C) / (F1, 128C)	Abundance Ratio: (F1, 131) / (F1, 128C)	Abundance: F1: 126, Sample	Abundance: F1: 127N, Sample	Abundance: F1: 127C, Sample	Abundance: F1: 128N, Sample	Abundance: F1: 128C, Control	Abundance: F1: 129N, Sample	Abundance: F1: 129C, Sample	Abundance: F1: 130N, Sample	Abundance: F1: 130C, Sample	Abundance: F1: 131, Sample	Abundances Count: F1: 126, Sample	Abundances Count: F1: 127N, Sample	Abundances Count: F1: 127C, Sample	Abundances Count: F1: 128N, Sample	Abundances Count: F1: 128C, Control	Abundances Count: F1: 129N, Sample
FALSE	High	[R].EVEQWFTTQTEELNK.[Q]	2xTMT6plex [N-Term; K15]		TRUE	0.000778507	0	1	1	3	2135530	2135530 [242-256]	0	2340.21	High	High	High	High	High	High	High	High	High	High	0.866	1.642	1.16	5.737	1.674	1.088	1.491	2.081	2.008	111900	212000	149800	740900	129100	216100	140500	192500	268800	259300	2	2	2	2	2	2
FALSE	High	[R].LNVEVDAAPTVDLNR.[V]	1xTMT6plex [N-Term]		TRUE	0.000817314	0	1	7	2	2135530	2135530 [209-223]	0	1855.01	High	High	High	High	High	High	High	High	High	High
FALSE	High	[R].DNAELENLIR.[E]	1xTMT6plex [N-Term]		TRUE	0.00358237	0	2	4	6	2135530; Q14525	2135530 [80-89]; Q14525 [80-89]	0	1415.77	High	High	High	High	High	High	High	High	High	High	0.64	1.078	0.63	5.511	1.572	0.439	1.045	0.869	1.133	971400	1635000	956400	8359000	1517000	2384000	666000	1585000	1318000	1719000	4	4	4	4	4	4
FALSE	High	[R].QNQEYQVLLDVR.[A]	1xTMT6plex [N-Term]		TRUE	0.000541528	0	2	16	4	2135530; Q14525	2135530 [335-346]; Q14525 [335-346]	0	1733.94	High	High	High	High	High	High	High	High	High	High	0.563	1.421	0.856	7.578	1.916	0.754	0.893	1.232	1.231	193400	488300	294100	2605000	343700	658500	259300	307000	423600	423000	3	3	3	3	3	3
FALSE	High	[R].TVNALEIELQAQHNLR.[DY]	1xTMT6plex [N-Term]		TRUE	5.54282e-05	0	2	5	3	2135530; Q14525	2135530 [278-293]; Q14525 [278-293]	0	2078.16	High	High	High	High	High	High	High	High	High	High	1.095	2.506	0.936	2.071	1.42	0.984	1.523	1.317	1.241	234800	537500	200700	444100	214500	304600	211000	326600	282500	266100	2	2	2	2	2	2
FALSE	High	[R].YSSQLSQVQSLITNVESQLAEIR.[S]	1xTMT6plex [N-Term]		TRUE	5.59169e-07	0	2	3	4	2135530; Q14525	2135530 [307-329]; Q14525 [307-329]	0	2822.51	High	High	High	High	High	High	High	High	High	High	0.728	1.618	0.907	2.731	1.581	1.427	0.883	3.235	5.693	27480	61070	34240	103100	37740	59650	53860	33320	122100	214800	2	2	2	2	2	2
FALSE	High	[KR].SDLEAQVESLKEELLCLK.[SQKR]	3xTMT6plex [N-Term; K11; K18]; 1xCarbamidomethyl [C16]		TRUE	0.00224449	0	1	9	6	2135530	2135530 [174-191]	1	2791.57	High	High	High	High	High	High	High	High	High	High	0.602	1.089	0.509	27.919	4.756	0.512	0.286	0.499	0.722	3942	7126	3329	182700	6545	31130	3351	1873	3264	4725	1	1	1	1	1	1
FALSE	High	[R].SQYEALVETNR.[R]	1xTMT6plex [N-Term]		TRUE	0.00075838	0	1	3	5	2135530	2135530 [230-240]	0	1538.8	High	High	High	High	High	High	High	High	High	High	0.539	0.94	0.812	12.462	2.203	0.754	1.368	1.307	1.689	121500	211800	182900	2808000	225300	496300	169900	308100	294400	380400	3	3	3	3	3	3
FALSE	High	[R].ILDELTLCK.[SA]	2xTMT6plex [N-Term; K9]; 1xCarbamidomethyl [C8]		TRUE	0.0130262	0.00117917	1	10	3	2135530	2135530 [165-173]	0	1562.92	High	High	High	High	High	High	High	High	High	High	0.452	0.927	0.713	11.312	1.897	1.139	2.798	1.722	2.868	54080	110900	85390	1354000	119700	227100	136300	335000	206200	343300	1	1	1	1	1	1
FALSE	High	[KR].ETMQFLNDR.[L]	1xTMT6plex [N-Term]		TRUE	0.0200404	0.00171593	2	18	2	2135530; Q14525	2135530 [58-66]; Q14525 [58-66]	0	1382.69	High	High	High	High	High	High	High	High	High	High	0.443	0.805	0.708	5.678	1.865	0.634	1.413	0.981	1.583	59900	108800	95760	768000	135300	252300	85760	191100	132600	214100	1	1	1	1	1	1
FALSE	High	[KR].TIEELQQK.[I]	2xTMT6plex [N-Term; K8]		TRUE	0.0457772	0.00171593	2	12	4	2135530; Q14525	2135530 [109-116]; Q14525 [109-116]	0	1446.86	High	High	High	High	High	High	High	High	High	High	0.712	1.738	0.635	6.997	1.804	0.83	1.374	1.032	1.34	241200	588400	215200	2369000	338600	610900	281100	465100	349400	453500	2	2	2	2	2	2
FALSE	High	[R].LECEINTYR.[SG]	1xTMT6plex [N-Term]; 1xCarbamidomethyl [C3]		TRUE	0.0368722	0.00171593	2	20	2	2135530; Q14525	2135530 [349-357]; Q14525 [349-357]	0	1426.72	High	High	High	High	High	High	High	High	High	High	0.954	1.602	1.139	10.431	2.054	0.867	1.589	1.557	2.225	102500	172100	122400	1120000	107400	220600	93130	170600	167200	238900	1	1	1	1	1	1
FALSE	High	[R].LASYLEK.[V]	2xTMT6plex [N-Term; K7]		TRUE	0.156645	0.00250807	2	15	4	2135530; Q14525	2135530 [67-73]; Q14525 [67-73]	0	1281.78	High	High	High	High	High	High	High	High	High	High	100	100	100	100	100	100	100	100	100	192100	331200	1216000	24350000		2704000	673900	817500	920800	745900	1	1	1	1		1
High	Master Protein	Q5FW60	Major urinary protein 20 OS=Mus musculus GN=Mup20 PE=1 SV=1	FALSE	0	48.1163	39.779	8	50	5	1	181	20.916	4.89	High	High	High	High	High	High	High	High	High	High		381530	ENSMUSG00000078672	Mup20; LOC100505376	4	cell organization and biogenesis;metabolic process;regulation of biological process;response to stimulus;transport	cytosol;extracellular;nucleus	catalytic activity;protein binding;receptor activity;signal transducer activity;transporter activity	Pf00061	0.561	0.486	0.412	0.938	1.056	1.313	0.845	1.055	1.587	2703000	2342000	1986000	4518000	4817000	5089000	6324000
Checked	Confidence	Annotated Sequence	Modifications	Modifications in Master Proteins	Contaminant	Qvality PEP	Qvality q-value	# Protein Groups	# Proteins	# PSMs	Master Protein Accessions	Positions in Master Proteins	# Missed Cleavages	Theo. MH+ [Da]	Found in Sample: [S1] F1: 126, Sample	Found in Sample: [S2] F1: 127N, Sample	Found in Sample: [S3] F1: 127C, Sample	Found in Sample: [S4] F1: 128N, Sample	Found in Sample: [S5] F1: 128C, Control	Found in Sample: [S6] F1: 129N, Sample	Found in Sample: [S7] F1: 129C, Sample	Found in Sample: [S8] F1: 130N, Sample	Found in Sample: [S9] F1: 130C, Sample	Found in Sample: [S10] F1: 131, Sample	Abundance Ratio: (F1, 126) / (F1, 128C)	Abundance Ratio: (F1, 127N) / (F1, 128C)	Abundance Ratio: (F1, 127C) / (F1, 128C)	Abundance Ratio: (F1, 128N) / (F1, 128C)	Abundance Ratio: (F1, 129N) / (F1, 128C)	Abundance Ratio: (F1, 129C) / (F1, 128C)	Abundance Ratio: (F1, 130N) / (F1, 128C)	Abundance Ratio: (F1, 130C) / (F1, 128C)	Abundance Ratio: (F1, 131) / (F1, 128C)	Abundance: F1: 126, Sample	Abundance: F1: 127N, Sample	Abundance: F1: 127C, Sample	Abundance: F1: 128N, Sample	Abundance: F1: 128C, Control	Abundance: F1: 129N, Sample	Abundance: F1: 129C, Sample	Abundance: F1: 130N, Sample	Abundance: F1: 130C, Sample	Abundance: F1: 131, Sample	Abundances Count: F1: 126, Sample	Abundances Count: F1: 127N, Sample	Abundances Count: F1: 127C, Sample	Abundances Count: F1: 128N, Sample	Abundances Count: F1: 128C, Control	Abundances Count: F1: 129N, Sample
FALSE	High	[K].KDGETFQLMELYGR.[E]	2xTMT6plex [N-Term; K1]; 1xDeamidated [Q7]		FALSE	0.000772702	0	1	1	1	Q5FW60	Q5FW60 [128-141]	1	2146.13	High	High	High	High	High	High	High	High	High	High
FALSE	High	[K].DGETFQLMELYGR.[E]	1xTMT6plex [N-Term]		FALSE	0.000110365	0	1	2	4	Q5FW60	Q5FW60 [129-141]	0	1787.88	High	High	High	High	High	High	High	High	High	High	0.304	0.349	0.363	0.942	0.834	1.474	0.498	1.043	1.501	459300	526700	547900	1423000	1510000	1260000	2226000	751100	1575000	2267000	3	3	3	3	3	3
FALSE	High	[K].DGETFQLMELYGR.[E]	1xTMT6plex [N-Term]; 1xDeamidated [Q6]		FALSE	0.00805669	0	1	2	1	Q5FW60	Q5FW60 [129-141]	0	1788.87	High	High	High	High	High	High	High	High	High	High	0.448	0.456	0.461	0.949	0.762	1.398	0.406	1.08	1.333	266600	271400	274400	565200	595400	453800	832300	241800	642800	793700	1	1	1	1	1	1
FALSE	High	[K].KDGETFQLMELYGR.[E]	2xTMT6plex [N-Term; K1]		FALSE	2.28283e-05	0	1	1	5	Q5FW60	Q5FW60 [128-141]	1	2145.14	High	High	High	High	High	High	High	High	High	High	0.23	0.375	0.258	1.213	0.922	2.218	0.808	1.377	1.553	111900	182700	125900	590900	487200	449300	1080000	393900	670900	756800	4	4	4	4	4	4
FALSE	High	[R].VFVEYIHVLENSLALK.[F]	2xTMT6plex [N-Term; K16]		FALSE	0.000594636	0	1	1	1	Q5FW60	Q5FW60 [59-74]	0	2332.37	High	High	High	High	High	High	High	High	High	High
FALSE	High	[R].EKIEEHGSMR.[AV]	2xTMT6plex [N-Term; K2]		FALSE	0.00725767	0	2	5	11	P04939; Q5FW60	P04939 [52-61]; Q5FW60 [49-58]	1	1673.9	High	High	High	High	High	High	High	High	High	High	0.196	0.319	0.151	0.33	1.399	0.721	1.36	0.613	1.578	987100	1607000	758200	1662000	5033000	7041000	3631000	6846000	3086000	7941000	7	7	7	7	7	7
FALSE	High	[K].FAQLSEEHGIVR.[E]	1xTMT6plex [N-Term]		FALSE	0.00136975	0	1	1	6	Q5FW60	Q5FW60 [153-164]	0	1614.88	High	High	High	High	High	High	High	High	High	High	0.996	0.534	0.482	0.552	1.236	0.926	1.248	0.819	1.775	1548000	829300	749800	858500	1554000	1920000	1440000	1939000	1273000	2759000	4	4	4	4	4	4
FALSE	High	[R].ENIIDLTNANR.[C]	1xTMT6plex [N-Term]		FALSE	0.00981641	0.00117917	1	1	3	Q5FW60	Q5FW60 [165-175]	0	1501.82	High	High	High	High	High	High	High	High	High	High	0.581	0.848	0.57	2.619	1.458	1.169	1.276	1.529	1.701	188900	275400	185100	851100	324900	473700	379900	414500	496600	552500	1	1	1	1	1	1
FALSE	High	[R].EPDLSSDIK.[E]	2xTMT6plex [N-Term; K9]		FALSE	0.0137734	0.00117917	4	26	10	A2AKN8; Q5FW60; A2BIN1; A9R9W0	A2AKN8 [141-149]; Q5FW60 [142-150]; A2BIN1 [141-149]; A9R9W0 [141-149]	0	1461.82	High	High	High	High	High	High	High	High	High	High	0.254	0.444	0.26	0.495	1.397	1.606	1.001	2.236	2.236	855600	1494000	873200	1666000	3365000	4701000	5405000	3368000	7524000	7522000	8	8	8	8	8	8
FALSE	High	[K].IEEHGSMR.[AV]	1xTMT6plex [N-Term]		FALSE	0.0816554	0.00171593	2	5	4	P04939; Q5FW60	P04939 [54-61]; Q5FW60 [51-58]	0	1187.6	High	High	High	High	High	High	High	High	High	High	0.158	0.237	0.082	0.202	1.157	0.806	1.165	0.668	1.226	153600	230500	80170	196900	973500	1126000	784900	1134000	650100	1193000	4	4	4	4	4	4
FALSE	High	[K].DGETFQLMELYGR.[E]	1xTMT6plex [N-Term]; 1xOxidation [M8]		FALSE	0.0179299	0.00171593	1	2	4	Q5FW60	Q5FW60 [129-141]	0	1803.88	High	High	High	High	High	High	High	High	High	High	0.372	0.742	0.299	0.665	1.539	1.059	0.952	1.226	1.488	128400	256300	103200	229700	345500	531800	365700	329100	423700	514100	2	2	2	2	2	2
High	Master Protein	88052	A32568 *CON* keratin K5, 58K type II, epidermal (version 2) - human (fragment)	TRUE	0	48.0551	17.4873	13	60	4	1	589	61.996	7.77	High	High	High	High	High	High	High	High	High	High								catalytic activity;motor activity	Pf00038, Pf01576, Pf02994, Pf03961, Pf04111, Pf05957, Pf09728, Pf12128
Checked	Confidence	Annotated Sequence	Modifications	Modifications in Master Proteins	Contaminant	Qvality PEP	Qvality q-value	# Protein Groups	# Proteins	# PSMs	Master Protein Accessions	Positions in Master Proteins	# Missed Cleavages	Theo. MH+ [Da]	Found in Sample: [S1] F1: 126, Sample	Found in Sample: [S2] F1: 127N, Sample	Found in Sample: [S3] F1: 127C, Sample	Found in Sample: [S4] F1: 128N, Sample	Found in Sample: [S5] F1: 128C, Control	Found in Sample: [S6] F1: 129N, Sample	Found in Sample: [S7] F1: 129C, Sample	Found in Sample: [S8] F1: 130N, Sample	Found in Sample: [S9] F1: 130C, Sample	Found in Sample: [S10] F1: 131, Sample	Abundance Ratio: (F1, 126) / (F1, 128C)	Abundance Ratio: (F1, 127N) / (F1, 128C)	Abundance Ratio: (F1, 127C) / (F1, 128C)	Abundance Ratio: (F1, 128N) / (F1, 128C)	Abundance Ratio: (F1, 129N) / (F1, 128C)	Abundance Ratio: (F1, 129C) / (F1, 128C)	Abundance Ratio: (F1, 130N) / (F1, 128C)	Abundance Ratio: (F1, 130C) / (F1, 128C)	Abundance Ratio: (F1, 131) / (F1, 128C)	Abundance: F1: 126, Sample	Abundance: F1: 127N, Sample	Abundance: F1: 127C, Sample	Abundance: F1: 128N, Sample	Abundance: F1: 128C, Control	Abundance: F1: 129N, Sample	Abundance: F1: 129C, Sample	Abundance: F1: 130N, Sample	Abundance: F1: 130C, Sample	Abundance: F1: 131, Sample	Abundances Count: F1: 126, Sample	Abundances Count: F1: 127N, Sample	Abundances Count: F1: 127C, Sample	Abundances Count: F1: 128N, Sample	Abundances Count: F1: 128C, Control	Abundances Count: F1: 129N, Sample
FALSE	High	[K].WTLLQEQGTK.[T]	2xTMT6plex [N-Term; K10]		TRUE	0.00222776	0	3	13	6	125105; 1346344; 88052	125105 [200-209]; 1346344 [195-204]; 88052 [199-208]	0	1661.96	High	High	High	High	High	High	High	High	High	High	0.801	0.37	0.741	0.517	0.889	0.704	0.686	1.005	0.52	519900	240000	481300	335800	649300	577100	456800	445700	652400	337400	3	3	3	3	3	3
FALSE	High	[-R].QNLEPLFEQYINNLR.[R]	1xTMT6plex [N-Term]		TRUE	0.000201619	0	3	14	5	125105; 1346344; 88052	125105 [213-227]; 1346344 [208-222]; 88052 [212-226]	0	2120.13	High	High	High	High	High	High	High	High	High	High	0.767	1.218	1.276	0.701	1.508	0.938	1.491	1.735	1.747	59410	94350	98860	54340	77490	116900	72650	115500	134400	135400	4	4	4	4	4	4
FALSE	High	[K].YEELQQTAGR.[H]	1xTMT6plex [N-Term]		TRUE	0.00656204	0	2	5	3	125105; 88052	125105 [365-374]; 88052 [364-373]	0	1423.74	High	High	High	High	High	High	High	High	High	High	1.109	0.703	0.632	0.683	1.042	0.915	0.735	0.909	0.757	439000	278000	250000	270200	395700	412100	362000	290800	359800	299600	2	2	2	2	2	2
FALSE	High	[K].LALDVEIATYR.[K]	1xTMT6plex [N-Term]		TRUE	0.0022529	0	4	29	3	125105; 254622; 1346344; 88052	125105 [461-471]; 254622 [477-487]; 1346344 [456-466]; 88052 [460-470]	0	1492.86	High	High	High	High	High	High	High	High	High	High	0.932	0.701	3.658	2.091	0.878	1.68	0.664	2.009	0.816	557100	418800	2187000	1250000	597700	524600	1004000	396900	1201000	488000	2	2	2	2	2	2
FALSE	High	[R].NLDLDSIIAEVK.[A]	2xTMT6plex [N-Term; K12]		TRUE	0.000122559	0	4	19	10	125105; 254622; 1346344; 88052	125105 [332-343]; 254622 [348-359]; 1346344 [327-338]; 88052 [331-342]	0	1788.05	High	High	High	High	High	High	High	High	High	High	1.42	0.564	1.75	1.314	0.448	1.109	0.291	1.649	0.364	1886000	748600	2324000	1745000	1328000	595100	1472000	386500	2189000	483700	7	7	7	7	7	7
FALSE	High	[K].NKYEDQINK.[R]	3xTMT6plex [N-Term; K2; K9]; 1xDeamidated [Q6]		TRUE	0.0128338	0.00117917	1	2	7	88052	88052 [255-263]	1	1840.04	High	High	High	High	High	High	High	High	High	High
FALSE	High	[K].LAELEEALQK.[A]	2xTMT6plex [N-Term; K10]		TRUE	0.0103805	0.00117917	2	4	3	125105; 88052	125105 [432-441]; 88052 [431-440]	0	1601.95	High	High	High	High	High	High	High	High	High	High	1.111	0.597	1.888	0.682	0.679	0.901	0.509	1.067	0.553	266100	142800	452000	163300	239400	162500	215800	121900	255500	132300	2	2	2	2	2	2
FALSE	High	[K].YEDQINK.[R]	2xTMT6plex [N-Term; K7]; 1xDeamidated [Q4]		TRUE	0.112298	0.00171593	1	2	4	88052	88052 [257-263]	0	1368.74	High	High	High	High	High	High	High	High	High	High
FALSE	High	[R].QLDSIVGER.[G]	1xTMT6plex [N-Term]		TRUE	0.120018	0.00171593	3	12	2	125105; 1346344; 88052	125105 [229-237]; 1346344 [224-232]; 88052 [228-236]	0	1245.7	High	High	High	High	High	High	High	High	High	High	0.615	0.725	0.874	0.456	1.195	0.665	1.047	0.974	0.816	463500	546400	658600	343900	753900	900700	501200	789400	734600	614900	1	1	1	1	1	1
FALSE	High	[R].KLLEGEECR.[LMI]	2xTMT6plex [N-Term; K1]; 1xCarbamidomethyl [C8]		TRUE	0.0880029	0.00171593	4	31	5	125105; 254622; 1346344; 88052	125105 [472-480]; 254622 [488-496]; 1346344 [467-475]; 88052 [471-479]	1	1591.89	High	High	High	High	High	High	High	High	High	High
FALSE	High	[K].NKYEDQINKR.[T]	3xTMT6plex [N-Term; K2; K9]; 1xDeamidated [Q6]		TRUE	0.0233284	0.00171593	1	2	5	88052	88052 [255-264]	2	1996.14	High	High	High	High	High	High	High	High	High	High
FALSE	High	[K].YEDQINKR.[T]	2xTMT6plex [N-Term; K7]; 1xDeamidated [Q4]		TRUE	0.187565	0.00804114	1	2	2	88052	88052 [257-264]	1	1524.84	High	High	High	High	High	High	High	High	High	High
FALSE	High	[R].FLEQQNK.[LAVIM]	2xTMT6plex [N-Term; K7]		TRUE	0.186933	0.00804114	6	62	5	125105; 1346344; 88052; 1903218; 2190400; 1903220	125105 [188-194]; 1346344 [183-189]; 88052 [187-193]; 1903218 [143-149]; 2190400 [126-132]; 1903220 [123-129]	0	1364.79	High	High	High	High	High	High	High	High	High	High
High	Master Protein	Q6YI28	EP1 OS=Mus musculus GN=2210407C18Rik PE=2 SV=1	FALSE	0	47.9732	40.4545	6	84	6	1	220	23.66	7.69	High	High	High	High	High	High	High	High	High	High		78354	ENSMUSG00000037145	2210407C18Rik	11					0.595	1.023	0.687	2.32	1.19	2.043	0.949	3.425	1.261	9768000	16800000	11290000	38110000	16430000	19560000	33570000
Checked	Confidence	Annotated Sequence	Modifications	Modifications in Master Proteins	Contaminant	Qvality PEP	Qvality q-value	# Protein Groups	# Proteins	# PSMs	Master Protein Accessions	Positions in Master Proteins	# Missed Cleavages	Theo. MH+ [Da]	Found in Sample: [S1] F1: 126, Sample	Found in Sample: [S2] F1: 127N, Sample	Found in Sample: [S3] F1: 127C, Sample	Found in Sample: [S4] F1: 128N, Sample	Found in Sample: [S5] F1: 128C, Control	Found in Sample: [S6] F1: 129N, Sample	Found in Sample: [S7] F1: 129C, Sample	Found in Sample: [S8] F1: 130N, Sample	Found in Sample: [S9] F1: 130C, Sample	Found in Sample: [S10] F1: 131, Sample	Abundance Ratio: (F1, 126) / (F1, 128C)	Abundance Ratio: (F1, 127N) / (F1, 128C)	Abundance Ratio: (F1, 127C) / (F1, 128C)	Abundance Ratio: (F1, 128N) / (F1, 128C)	Abundance Ratio: (F1, 129N) / (F1, 128C)	Abundance Ratio: (F1, 129C) / (F1, 128C)	Abundance Ratio: (F1, 130N) / (F1, 128C)	Abundance Ratio: (F1, 130C) / (F1, 128C)	Abundance Ratio: (F1, 131) / (F1, 128C)	Abundance: F1: 126, Sample	Abundance: F1: 127N, Sample	Abundance: F1: 127C, Sample	Abundance: F1: 128N, Sample	Abundance: F1: 128C, Control	Abundance: F1: 129N, Sample	Abundance: F1: 129C, Sample	Abundance: F1: 130N, Sample	Abundance: F1: 130C, Sample	Abundance: F1: 131, Sample	Abundances Count: F1: 126, Sample	Abundances Count: F1: 127N, Sample	Abundances Count: F1: 127C, Sample	Abundances Count: F1: 128N, Sample	Abundances Count: F1: 128C, Control	Abundances Count: F1: 129N, Sample
FALSE	High	[K].GCASYQNLCALEFSATLGNR.[Q]	1xTMT6plex [N-Term]; 2xCarbamidomethyl [C2; C9]		FALSE	0.0075617	0	1	1	1	Q6YI28	Q6YI28 [74-93]	0	2461.18	High	High	High	High	High	High	High	High	High	High
FALSE	High	[K].LETPSPDTNLVLEQK.[G]	2xTMT6plex [N-Term; K15]		FALSE	5.86293e-05	0	1	1	21	Q6YI28	Q6YI28 [59-73]	0	2142.21	High	High	High	High	High	High	High	High	High	High	2.413	4.839	2.017	7.571	1.699	2.735	1.139	2.238	1.629	3811000	7643000	3186000	11960000	1579000	2683000	4320000	1800000	3535000	2574000	17	17	17	17	17	17
FALSE	High	[K].GCATENACALYMTVFNNIQIK.[T]	2xTMT6plex [N-Term; K21]; 1xDeamidated [N]; 2xCarbamidomethyl [C2; C8]		FALSE	0.00229544	0	1	1	2	Q6YI28	Q6YI28 [171-191]	0	2877.43	High	High	High	High	High	High	High	High	High	High	0.983	1.451	1.35	3.398	0.945	1.667	0.654	1.884	1.383	14640	21610	20100	50600	14890	14070	24820	9742	28050	20590	1	1	1	1	1	1
FALSE	High	[K].TQCCTGEQCNK.[E]	2xTMT6plex [N-Term; K11]; 3xCarbamidomethyl [C3; C4; C9]		FALSE	0.000380931	0	1	1	10	Q6YI28	Q6YI28 [100-110]	0	1843.85	High	High	High	High	High	High	High	High	High	High	0.276	0.491	0.268	0.725	0.931	1.168	0.81	2.704	1.163	292100	519600	283500	767500	1058000	985200	1236000	857700	2861000	1231000	9	9	9	9	9	9
FALSE	High	[K].TNTCSTTTPLK.[C]	2xTMT6plex [N-Term; K11]; 1xCarbamidomethyl [C4]		FALSE	0.00231268	0	1	1	17	Q6YI28	Q6YI28 [135-145]	0	1681.92	High	High	High	High	High	High	High	High	High	High	0.289	0.49	0.289	1.02	1.043	1.286	0.874	2.401	0.939	2479000	4202000	2477000	8740000	8572000	8942000	11030000	7492000	20590000	8053000	9	9	9	9	9	9
FALSE	High	[K].TNTCSTTTPLK.[C]	2xTMT6plex [N-Term; K11]; 1xDeamidated [N2]; 1xCarbamidomethyl [C4]		FALSE	0.00182025	0	1	1	5	Q6YI28	Q6YI28 [135-145]	0	1682.9	High	High	High	High	High	High	High	High	High	High	0.404	0.572	0.384	1.148	0.986	1.391	0.954	2.394	1.306	88610	125500	84230	252000	219400	216300	305100	209400	525200	286500	3	3	3	3	3	3
FALSE	High	[R].DPSSNIVMYGK.[G]	2xTMT6plex [N-Term; K11]		FALSE	0.000727797	0	1	1	15	Q6YI28	Q6YI28 [160-170]	0	1668.9	High	High	High	High	High	High	High	High	High	High	0.576	0.776	1.032	3.363	1.383	3.49	1.001	6.021	1.722	2410000	3249000	4322000	14080000	4187000	5789000	14610000	4191000	25210000	7211000	12	12	12	12	12	12
FALSE	High	[R].DPSSNIVMYGK.[G]	2xTMT6plex [N-Term; K11]; 1xOxidation [M8]		FALSE	0.00540399	0	1	1	10	Q6YI28	Q6YI28 [160-170]	0	1684.9	High	High	High	High	High	High	High	High	High	High	0.84	1.3	1.141	2.865	1.163	2.568	1.311	4.444	1.687	659300	1021000	895800	2249000	785000	913100	2016000	1029000	3489000	1324000	4	4	4	4	4	4
FALSE	High	[K].GCASYQNLCALEFSATLGNR.[Q]	1xTMT6plex [N-Term]; 1xDeamidated [N7]; 2xCarbamidomethyl [C2; C9]		FALSE	0.0116505	0.00117917	1	1	3	Q6YI28	Q6YI28 [74-93]	0	2462.16	High	High	High	High	High	High	High	High	High	High	0.942	1.35	1.555	1.018	0.946	2.067	0.885	3.177	1.373	13640	19550	22520	14730	14480	13700	29920	12820	46000	19890	1	1	1	1	1	1
High	Master Protein	Q9JJ00	Phospholipid scramblase 1 OS=Mus musculus GN=Plscr1 PE=2 SV=1	FALSE	0	45.1016	14.939	4	37	4	1	328	35.89	5.06	High	High	High	High	High	High	High	High	High	High		22038	ENSMUSG00000032369	Plscr1	9	cell death;cell differentiation;cell organization and biogenesis;defense response;metabolic process;regulation of biological process;response to stimulus	cytosol;Golgi;membrane;nucleus	DNA binding;metal ion binding;protein binding;transporter activity	Pf03803	0.314	0.62	0.258	0.64	1.623	1.455	1.678	1.767	1.28	2830000	5591000	2331000	5771000	9018000	14640000	13120000
Checked	Confidence	Annotated Sequence	Modifications	Modifications in Master Proteins	Contaminant	Qvality PEP	Qvality q-value	# Protein Groups	# Proteins	# PSMs	Master Protein Accessions	Positions in Master Proteins	# Missed Cleavages	Theo. MH+ [Da]	Found in Sample: [S1] F1: 126, Sample	Found in Sample: [S2] F1: 127N, Sample	Found in Sample: [S3] F1: 127C, Sample	Found in Sample: [S4] F1: 128N, Sample	Found in Sample: [S5] F1: 128C, Control	Found in Sample: [S6] F1: 129N, Sample	Found in Sample: [S7] F1: 129C, Sample	Found in Sample: [S8] F1: 130N, Sample	Found in Sample: [S9] F1: 130C, Sample	Found in Sample: [S10] F1: 131, Sample	Abundance Ratio: (F1, 126) / (F1, 128C)	Abundance Ratio: (F1, 127N) / (F1, 128C)	Abundance Ratio: (F1, 127C) / (F1, 128C)	Abundance Ratio: (F1, 128N) / (F1, 128C)	Abundance Ratio: (F1, 129N) / (F1, 128C)	Abundance Ratio: (F1, 129C) / (F1, 128C)	Abundance Ratio: (F1, 130N) / (F1, 128C)	Abundance Ratio: (F1, 130C) / (F1, 128C)	Abundance Ratio: (F1, 131) / (F1, 128C)	Abundance: F1: 126, Sample	Abundance: F1: 127N, Sample	Abundance: F1: 127C, Sample	Abundance: F1: 128N, Sample	Abundance: F1: 128C, Control	Abundance: F1: 129N, Sample	Abundance: F1: 129C, Sample	Abundance: F1: 130N, Sample	Abundance: F1: 130C, Sample	Abundance: F1: 131, Sample	Abundances Count: F1: 126, Sample	Abundances Count: F1: 127N, Sample	Abundances Count: F1: 127C, Sample	Abundances Count: F1: 128N, Sample	Abundances Count: F1: 128C, Control	Abundances Count: F1: 129N, Sample
FALSE	High	[R].VYFAVEDTDCCTR.[N]	1xTMT6plex [N-Term]; 2xCarbamidomethyl [C10; C11]		FALSE	0.000169097	0	1	1	3	Q9JJ00	Q9JJ00 [148-160]	0	1864.84	High	High	High	High	High	High	High	High	High	High	0.492	0.57	0.384	0.531	1.769	0.84	1.419	1.945	2.004	216000	250600	168700	233100	439300	777300	369100	623500	854300	880500	3	3	3	3	3	3
FALSE	High	[R].EAFTDADNFGIQFPLDLDVK.[M]	2xTMT6plex [N-Term; K20]; 1xDeamidated [Q12]		FALSE	7.04314e-05	0	1	1	3	Q9JJ00	Q9JJ00 [278-297]	0	2714.4	High	High	High	High	High	High	High	High	High	High	0.348	0.39	0.145	0.824	1.23	0.647	0.43	1.694	0.845	16770	18830	6969	39730	48210	59300	31180	20720	81660	40750	2	2	2	2	2	2
FALSE	High	[R].EAFTDADNFGIQFPLDLDVK.[M]	2xTMT6plex [N-Term; K20]		FALSE	2.5367e-06	0	1	1	19	Q9JJ00	Q9JJ00 [278-297]	0	2713.41	High	High	High	High	High	High	High	High	High	High	0.341	0.321	0.252	0.859	1.228	0.746	0.5	1.818	0.979	232200	218900	171700	585400	681100	836700	508200	340800	1238000	667000	15	15	15	15	15	15
FALSE	High	[K].SLDEESVVGK.[I]	2xTMT6plex [N-Term; K10]		FALSE	0.00211408	0	1	1	9	Q9JJ00	Q9JJ00 [258-267]	0	1520.86	High	High	High	High	High	High	High	High	High	High	0.4	0.964	0.306	0.878	1.472	1.939	1.364	2.136	1.468	1478000	3561000	1129000	3244000	3695000	5438000	7165000	5039000	7893000	5423000	5	5	5	5	5	5
FALSE	High	[RK].KQDVLK.[EV]	3xTMT6plex [N-Term; K1; K6]		FALSE	0.183184	0.00651022	1	5	3	Q9JJ00	Q9JJ00 [233-238]	1	1417.93	High	High	High	High	High	High	High	High	High	High	0.213	0.371	0.206	0.402	1.811	1.215	2.193	1.412	1.091	886700	1542000	854500	1669000	4154000	7525000	5049000	9109000	5867000	4534000	2	2	2	2	2	2
High	Master Protein	P00688	Pancreatic alpha-amylase OS=Mus musculus GN=Amy2 PE=1 SV=2	FALSE	0	43.9859	21.4567	10	43	10	1	508	57.282	7.28	High	High	High	High	High	High	High	High	High	High		109959; 100043688; 100043686; 100043684	ENSMUSG00000096770; ENSMUSG00000074268; ENSMUSG00000093931; ENSMUSG00000096569	Amy2a5; Amy2a2; Amy2a3; Amy2a4	3	metabolic process	extracellular	catalytic activity;metal ion binding	Pf00128, Pf02806	2.977	5.556	1.745	0.848	1.4	0.733	1.336	1.031	1.306	15350000	28640000	8992000	4371000	5154000	7215000	3776000
Checked	Confidence	Annotated Sequence	Modifications	Modifications in Master Proteins	Contaminant	Qvality PEP	Qvality q-value	# Protein Groups	# Proteins	# PSMs	Master Protein Accessions	Positions in Master Proteins	# Missed Cleavages	Theo. MH+ [Da]	Found in Sample: [S1] F1: 126, Sample	Found in Sample: [S2] F1: 127N, Sample	Found in Sample: [S3] F1: 127C, Sample	Found in Sample: [S4] F1: 128N, Sample	Found in Sample: [S5] F1: 128C, Control	Found in Sample: [S6] F1: 129N, Sample	Found in Sample: [S7] F1: 129C, Sample	Found in Sample: [S8] F1: 130N, Sample	Found in Sample: [S9] F1: 130C, Sample	Found in Sample: [S10] F1: 131, Sample	Abundance Ratio: (F1, 126) / (F1, 128C)	Abundance Ratio: (F1, 127N) / (F1, 128C)	Abundance Ratio: (F1, 127C) / (F1, 128C)	Abundance Ratio: (F1, 128N) / (F1, 128C)	Abundance Ratio: (F1, 129N) / (F1, 128C)	Abundance Ratio: (F1, 129C) / (F1, 128C)	Abundance Ratio: (F1, 130N) / (F1, 128C)	Abundance Ratio: (F1, 130C) / (F1, 128C)	Abundance Ratio: (F1, 131) / (F1, 128C)	Abundance: F1: 126, Sample	Abundance: F1: 127N, Sample	Abundance: F1: 127C, Sample	Abundance: F1: 128N, Sample	Abundance: F1: 128C, Control	Abundance: F1: 129N, Sample	Abundance: F1: 129C, Sample	Abundance: F1: 130N, Sample	Abundance: F1: 130C, Sample	Abundance: F1: 131, Sample	Abundances Count: F1: 126, Sample	Abundances Count: F1: 127N, Sample	Abundances Count: F1: 127C, Sample	Abundances Count: F1: 128N, Sample	Abundances Count: F1: 128C, Control	Abundances Count: F1: 129N, Sample
FALSE	High	[K].EVTINADTTCGNDWVCEHR.[W]	1xTMT6plex [N-Term]; 2xCarbamidomethyl [C10; C16]		FALSE	8.43479e-06	0	1	1	4	P00688	P00688 [381-399]	0	2506.13	High	High	High	High	High	High	High	High	High	High	0.866	1.397	1.392	0.527	1.193	0.648	0.969	0.962	1.1	235400	379700	378200	143300	271800	324200	176100	263300	261400	298900	3	3	3	3	3	3
FALSE	High	[R].TAIVHLFEWR.[W]	1xTMT6plex [N-Term]		FALSE	0.00897661	0	1	5	2	P00688	P00688 [26-35]	0	1500.85	High	High	High	High	High	High	High	High	High	High	5.105	8.664	5.774	1.144	2.382	0.887	0.941	2.197	2.888	62290	105700	70460	13960	12200	29070	10830	11490	26810	35240	1	1	1	1	1	1
FALSE	High	[R].GHGAGGSSILTFWDAR.[M]	1xTMT6plex [N-Term]		FALSE	8.36646e-05	0	1	1	1	P00688	P00688 [316-331]	0	1860.96	High	High	High	High	High	High	High	High	High	High
FALSE	High	[R].LTGLLDLALEKDYVR.[T]	2xTMT6plex [N-Term; K11]		FALSE	1.02538e-06	0	1	2	6	P00688	P00688 [174-188]	1	2177.29	High	High	High	High	High	High	High	High	High	High	13.275	18.175	7.445	2.234	0.568	0.365	0.44	0.48	0.555	2765000	3785000	1550000	465100	208300	118400	76020	91710	99900	115600	5	5	5	5	5	5
FALSE	High	[R].LTGLLDLALEK.[D]	2xTMT6plex [N-Term; K11]		FALSE	0.000535483	0	1	2	10	P00688	P00688 [174-184]	0	1644.03	High	High	High	High	High	High	High	High	High	High	11.352	21.136	7.781	1.986	0.941	0.688	0.546	1.08	0.877	1526000	2841000	1046000	266900	134400	126500	92420	73440	145200	117900	8	8	8	8	8	8
FALSE	High	[R].ALVFVDNHDNQR.[G]	1xTMT6plex [N-Term]		FALSE	0.00279879	0	1	2	3	P00688	P00688 [304-315]	0	1656.87	High	High	High	High	High	High	High	High	High	High	1.257	2.686	1.825	0.743	1.446	0.558	1.171	0.988	1.552	538800	1151000	782500	318400	428700	620100	239300	502000	423600	665200	1	1	1	1	1	1
FALSE	High	[K].VADYMNHLIDIGVAGFR.[L]	1xTMT6plex [N-Term]		FALSE	0.0131235	0.00117917	1	4	1	P00688	P00688 [191-207]	0	2120.12	High	High	High	High	High	High	High	High	High	High
FALSE	High	[K].HMWPGDIK.[A]	2xTMT6plex [N-Term; K8]; 1xOxidation [M2]		FALSE	0.120018	0.00171593	1	4	4	P00688	P00688 [213-220]	0	1457.8	High	High	High	High	High	High	High	High	High	High	3.692	7.852	1.606	1.014	1.456	0.948	2.199	1.356	2.503	2125000	4520000	924300	584000	575600	838000	545900	1266000	780500	1441000	3	3	3	3	3	3
FALSE	High	[K].AVLDKLHNLNTK.[W]	3xTMT6plex [N-Term; K5; K12]		FALSE	0.0522019	0.00171593	1	2	2	P00688	P00688 [221-232]	1	2053.27	High	High	High	High	High	High	High	High	High	High	1.805	4.345	0.966	0.567	1.121	0.376	1.184	0.729	1.408	422800	1018000	226200	132800	234200	262600	88080	277300	170700	329700	2	2	2	2	2	2
FALSE	High	[K].LHNLNTK.[W]	2xTMT6plex [N-Term; K7]		FALSE	0.166579	0.00332358	1	4	6	P00688	P00688 [226-232]	0	1297.8	High	High	High	High	High	High	High	High	High	High	2.545	4.852	1.409	0.737	1.499	0.536	0.958	0.882	0.983	5908000	11260000	3271000	1710000	2322000	3480000	1243000	2224000	2048000	2283000	4	4	4	4	4	4
FALSE	High	[K].HMWPGDIK.[A]	2xTMT6plex [N-Term; K8]		FALSE	0.176488	0.00492494	1	4	4	P00688	P00688 [213-220]	0	1441.8	High	High	High	High	High	High	High	High	High	High	1.822	3.692	0.768	0.762	1.464	1.349	2.25	1.405	1.496	1763000	3571000	743200	736800	967100	1416000	1304000	2176000	1359000	1447000	3	3	3	3	3	3
High	Master Protein	P09803	Cadherin-1 OS=Mus musculus GN=Cdh1 PE=1 SV=1	FALSE	0	41.2045	13.1222	8	43	8	1	884	98.195	4.83	High	High	High	High	High	High	High	High	High	High		12550		Cdh1	8	cell differentiation;cell organization and biogenesis;metabolic process;regulation of biological process;response to stimulus	cell surface;cytoplasm;cytoskeleton;endosome;Golgi;membrane	metal ion binding;protein binding	Pf00028, Pf01049, Pf08758	0.326	0.555	0.421	0.827	1.355	1.258	1.983	3.97	3.355	2373000	4037000	3061000	6015000	7271000	9854000	9145000
Checked	Confidence	Annotated Sequence	Modifications	Modifications in Master Proteins	Contaminant	Qvality PEP	Qvality q-value	# Protein Groups	# Proteins	# PSMs	Master Protein Accessions	Positions in Master Proteins	# Missed Cleavages	Theo. MH+ [Da]	Found in Sample: [S1] F1: 126, Sample	Found in Sample: [S2] F1: 127N, Sample	Found in Sample: [S3] F1: 127C, Sample	Found in Sample: [S4] F1: 128N, Sample	Found in Sample: [S5] F1: 128C, Control	Found in Sample: [S6] F1: 129N, Sample	Found in Sample: [S7] F1: 129C, Sample	Found in Sample: [S8] F1: 130N, Sample	Found in Sample: [S9] F1: 130C, Sample	Found in Sample: [S10] F1: 131, Sample	Abundance Ratio: (F1, 126) / (F1, 128C)	Abundance Ratio: (F1, 127N) / (F1, 128C)	Abundance Ratio: (F1, 127C) / (F1, 128C)	Abundance Ratio: (F1, 128N) / (F1, 128C)	Abundance Ratio: (F1, 129N) / (F1, 128C)	Abundance Ratio: (F1, 129C) / (F1, 128C)	Abundance Ratio: (F1, 130N) / (F1, 128C)	Abundance Ratio: (F1, 130C) / (F1, 128C)	Abundance Ratio: (F1, 131) / (F1, 128C)	Abundance: F1: 126, Sample	Abundance: F1: 127N, Sample	Abundance: F1: 127C, Sample	Abundance: F1: 128N, Sample	Abundance: F1: 128C, Control	Abundance: F1: 129N, Sample	Abundance: F1: 129C, Sample	Abundance: F1: 130N, Sample	Abundance: F1: 130C, Sample	Abundance: F1: 131, Sample	Abundances Count: F1: 126, Sample	Abundances Count: F1: 127N, Sample	Abundances Count: F1: 127C, Sample	Abundances Count: F1: 128N, Sample	Abundances Count: F1: 128C, Control	Abundances Count: F1: 129N, Sample
FALSE	High	[K].DINDNAPVFNPSTYQGQVPENEVNAR.[I]	1xTMT6plex [N-Term]; 1xDeamidated [Q/N]		FALSE	0.000178194	0	1	1	2	P09803	P09803 [369-394]	0	3118.49	High	High	High	High	High	High	High	High	High	High
FALSE	High	[K].AVYTVVNDPDQQFVVVTDPTTNDGILK.[T]	2xTMT6plex [N-Term; K27]; 1xDeamidated [Q/N]		FALSE	8.84962e-05	0	1	1	2	P09803	P09803 [413-439]	0	3407.8	High	High	High	High	High	High	High	High	High	High	0.258	0.577	0.527	1.332	1.254	1.647	0.944	2.114	1.427	4318	9650	8820	22280	16730	20990	27550	15790	35370	23870	1	1	1	1	1	1
FALSE	High	[R].DTANWLEINPETGAIFTR.[A]	1xTMT6plex [N-Term]		FALSE	1.17693e-05	0	1	1	8	P09803	P09803 [530-547]	0	2277.17	High	High	High	High	High	High	High	High	High	High	0.919	0.599	0.435	1.08	1.086	2.243	1.278	5.447	2.796	176300	115000	83570	207200	191900	208400	430600	245200	1045000	536600	5	5	5	5	5	5
FALSE	High	[R].KDLEIGEYK.[I]	3xTMT6plex [N-Term; K1; K9]		FALSE	0.00199871	0	1	1	10	P09803	P09803 [658-666]	1	1782.06	High	High	High	High	High	High	High	High	High	High	0.272	0.567	0.621	1.297	2.061	1.287	1.872	4.225	4.6	534200	1111000	1218000	2545000	1962000	4042000	2525000	3672000	8288000	9024000	6	6	6	6	6	6
FALSE	High	[K].VTDDDAPNTPAWK.[A]	2xTMT6plex [N-Term; K13]		FALSE	0.000398428	0	1	1	8	P09803	P09803 [400-412]	0	1887.99	High	High	High	High	High	High	High	High	High	High	0.401	0.782	0.428	0.712	1.036	1.193	1.542	3.911	2.865	508400	989900	542300	901700	1266000	1313000	1511000	1953000	4952000	3628000	5	5	5	5	5	5
FALSE	High	[R].EPDTFMDQK.[I]	2xTMT6plex [N-Term; K9]		FALSE	0.010227	0.00117917	1	1	6	P09803	P09803 [514-522]	0	1568.8	High	High	High	High	High	High	High	High	High	High	0.401	0.563	0.413	0.656	1.081	1.275	2.206	3.995	2.984	784000	1100000	806900	1283000	1955000	2114000	2492000	4312000	7809000	5833000	6	6	6	6	6	6
FALSE	High	[K].GLDFEAK.[Q]	2xTMT6plex [N-Term; K7]		FALSE	0.175295	0.00492494	1	1	4	P09803	P09803 [443-449]	0	1237.72	High	High	High	High	High	High	High	High	High	High	0.185	0.347	0.212	0.565	1.075	1.15	2.252	3.554	2.73	316300	592300	361300	964400	1706000	1834000	1962000	3842000	6062000	4657000	2	2	2	2	2	2
FALSE	High	[K].LADNQNK.[D]	2xTMT6plex [N-Term; K7]		FALSE	0.173519	0.00492494	1	1	3	P09803	P09803 [671-677]	0	1260.73	High	High	High	High	High	High	High	High	High	High	0.285	0.686	0.232	0.526	1.855	1.131	2.188	3.861	3.982	49470	119000	40310	91270	173600	322000	196300	379900	670200	691200	2	2	2	2	2	2
High	Master Protein	P18761	Carbonic anhydrase 6 OS=Mus musculus GN=Ca6 PE=1 SV=3	FALSE	0	40.3881	22.7129	6	45	6	1	317	36.472	6.6	High	High	High	High	High	High	High	High	High	High		12353	ENSMUSG00000028972	Car6	4	metabolic process;response to stimulus	cytoplasm;cytosol;extracellular	catalytic activity;metal ion binding	Pf00194	0.66	1.714	0.871	1.307	1.402	2.016	1.872	3.008	2.311	2923000	7590000	3855000	5786000	4428000	6206000	8928000
Checked	Confidence	Annotated Sequence	Modifications	Modifications in Master Proteins	Contaminant	Qvality PEP	Qvality q-value	# Protein Groups	# Proteins	# PSMs	Master Protein Accessions	Positions in Master Proteins	# Missed Cleavages	Theo. MH+ [Da]	Found in Sample: [S1] F1: 126, Sample	Found in Sample: [S2] F1: 127N, Sample	Found in Sample: [S3] F1: 127C, Sample	Found in Sample: [S4] F1: 128N, Sample	Found in Sample: [S5] F1: 128C, Control	Found in Sample: [S6] F1: 129N, Sample	Found in Sample: [S7] F1: 129C, Sample	Found in Sample: [S8] F1: 130N, Sample	Found in Sample: [S9] F1: 130C, Sample	Found in Sample: [S10] F1: 131, Sample	Abundance Ratio: (F1, 126) / (F1, 128C)	Abundance Ratio: (F1, 127N) / (F1, 128C)	Abundance Ratio: (F1, 127C) / (F1, 128C)	Abundance Ratio: (F1, 128N) / (F1, 128C)	Abundance Ratio: (F1, 129N) / (F1, 128C)	Abundance Ratio: (F1, 129C) / (F1, 128C)	Abundance Ratio: (F1, 130N) / (F1, 128C)	Abundance Ratio: (F1, 130C) / (F1, 128C)	Abundance Ratio: (F1, 131) / (F1, 128C)	Abundance: F1: 126, Sample	Abundance: F1: 127N, Sample	Abundance: F1: 127C, Sample	Abundance: F1: 128N, Sample	Abundance: F1: 128C, Control	Abundance: F1: 129N, Sample	Abundance: F1: 129C, Sample	Abundance: F1: 130N, Sample	Abundance: F1: 130C, Sample	Abundance: F1: 131, Sample	Abundances Count: F1: 126, Sample	Abundances Count: F1: 127N, Sample	Abundances Count: F1: 127C, Sample	Abundances Count: F1: 128N, Sample	Abundances Count: F1: 128C, Control	Abundances Count: F1: 129N, Sample
FALSE	High	[R].DWELSGSEHTIDGIR.[S]	1xTMT6plex [N-Term]		FALSE	4.7365e-05	0	1	2	10	P18761	P18761 [117-131]	0	1943.97	High	High	High	High	High	High	High	High	High	High	0.608	1.6	0.806	0.989	1.369	1.634	1.176	3.6	2.188	652300	1715000	863800	1061000	1072000	1468000	1752000	1261000	3861000	2346000	7	7	7	7	7	7
FALSE	High	[K].IDEYAENTYYSDIISALK.[N]	2xTMT6plex [N-Term; K18]		FALSE	6.99514e-06	0	1	2	12	P18761	P18761 [167-184]	0	2566.33	High	High	High	High	High	High	High	High	High	High	0.937	1.935	2.231	5.192	1.408	7.066	0.927	5.09	2.499	301000	621900	716800	1668000	321300	452400	2271000	297800	1636000	803100	10	10	10	10	10	10
FALSE	High	[K].NGLAVLAVLFK.[I]	2xTMT6plex [N-Term; K11]; 1xDeamidated [N1]		FALSE	0.00280928	0	1	2	2	P18761	P18761 [156-166]	0	1604.02	High	High	High	High	High	High	High	High	High	High	1.645	2.51	3.461	6.337	1.335	1.787	0.978	1.356	1.337	75760	115600	159400	291900	46050	61490	82290	45050	62470	61560	2	2	2	2	2	2
FALSE	High	[K].NIEKPGETTTLK.[D]	3xTMT6plex [N-Term; K4; K12]		FALSE	0.000996592	0	1	2	10	P18761	P18761 [185-196]	0	2018.21	High	High	High	High	High	High	High	High	High	High	0.788	2.202	0.881	1.096	1.43	1.776	2.12	2.774	2.225	1632000	4564000	1826000	2271000	2072000	2964000	3680000	4393000	5748000	4611000	8	8	8	8	8	8
FALSE	High	[K].EYGTYENAK.[D]	2xTMT6plex [N-Term; K9]; 1xDeamidated [N7]		FALSE	0.0131723	0.00117917	1	2	1	P18761	P18761 [144-152]	0	1533.78	High	High	High	High	High	High	High	High	High	High	0.166	0.242	0.189	0.338	1.396	1.055	2.287	1.677	2.315	33410	48620	37980	67910	200800	280300	211800	459300	336800	464800	1	1	1	1	1	1
FALSE	High	[K].EYGTYENAK.[D]	2xTMT6plex [N-Term; K9]		FALSE	0.0106151	0.00117917	1	2	5	P18761	P18761 [144-152]	0	1532.8	High	High	High	High	High	High	High	High	High	High	0.1	0.196	0.204	0.403	1.475	1.165	2.62	2.184	2.565	43630	85730	89510	176500	437900	645800	510200	1147000	956500	1123000	1	1	1	1	1	1
FALSE	High	[K].NGLAVLAVLFK.[I]	2xTMT6plex [N-Term; K11]		FALSE	0.0282767	0.00171593	1	2	1	P18761	P18761 [156-166]	0	1603.03	High	High	High	High	High	High	High	High	High	High	1.19	2.123	1.316	1.593	0.737	1.031	1.11	1.448	0.997	34240	61070	37870	45820	28770	21210	29670	31940	41660	28690	1	1	1	1	1	1
FALSE	High	[R].DKVTLSK.[A]	3xTMT6plex [N-Term; K2; K7]		FALSE	0.143257	0.00171593	1	2	4	P18761	P18761 [234-240]	1	1477.96	High	High	High	High	High	High	High	High	High	High	0.606	1.522	0.498	0.818	1.257	1.574	2.626	2.729	3.205	150600	378000	123700	203300	248400	312200	390800	652300	677700	796000	1	1	1	1	1	1
High	Master Protein	Q91X17	Uromodulin OS=Mus musculus GN=Umod PE=1 SV=1	FALSE	0	40.0333	14.0187	7	23	7	1	642	70.798	4.88	High	High	High	High	High	High	High	High	High	High		22242	ENSMUSG00000030963	Umod	7	cellular component movement;regulation of biological process;response to stimulus	cell surface;extracellular;Golgi;membrane	metal ion binding;protein binding	Pf00008, Pf00100, Pf06247, Pf07645, Pf12662, Pf12947	0.209	0.366	0.239	0.633	1.339	1.768	1.232	1.556	1.024	1189000	2081000	1361000	3603000	5691000	7622000	10060000
Checked	Confidence	Annotated Sequence	Modifications	Modifications in Master Proteins	Contaminant	Qvality PEP	Qvality q-value	# Protein Groups	# Proteins	# PSMs	Master Protein Accessions	Positions in Master Proteins	# Missed Cleavages	Theo. MH+ [Da]	Found in Sample: [S1] F1: 126, Sample	Found in Sample: [S2] F1: 127N, Sample	Found in Sample: [S3] F1: 127C, Sample	Found in Sample: [S4] F1: 128N, Sample	Found in Sample: [S5] F1: 128C, Control	Found in Sample: [S6] F1: 129N, Sample	Found in Sample: [S7] F1: 129C, Sample	Found in Sample: [S8] F1: 130N, Sample	Found in Sample: [S9] F1: 130C, Sample	Found in Sample: [S10] F1: 131, Sample	Abundance Ratio: (F1, 126) / (F1, 128C)	Abundance Ratio: (F1, 127N) / (F1, 128C)	Abundance Ratio: (F1, 127C) / (F1, 128C)	Abundance Ratio: (F1, 128N) / (F1, 128C)	Abundance Ratio: (F1, 129N) / (F1, 128C)	Abundance Ratio: (F1, 129C) / (F1, 128C)	Abundance Ratio: (F1, 130N) / (F1, 128C)	Abundance Ratio: (F1, 130C) / (F1, 128C)	Abundance Ratio: (F1, 131) / (F1, 128C)	Abundance: F1: 126, Sample	Abundance: F1: 127N, Sample	Abundance: F1: 127C, Sample	Abundance: F1: 128N, Sample	Abundance: F1: 128C, Control	Abundance: F1: 129N, Sample	Abundance: F1: 129C, Sample	Abundance: F1: 130N, Sample	Abundance: F1: 130C, Sample	Abundance: F1: 131, Sample	Abundances Count: F1: 126, Sample	Abundances Count: F1: 127N, Sample	Abundances Count: F1: 127C, Sample	Abundances Count: F1: 128N, Sample	Abundances Count: F1: 128C, Control	Abundances Count: F1: 129N, Sample
FALSE	High	[K].YFIIQDSCPR.[T]	1xTMT6plex [N-Term]; 1xCarbamidomethyl [C8]		FALSE	0.00693987	0	1	1	2	Q91X17	Q91X17 [521-530]	0	1527.78	High	High	High	High	High	High	High	High	High	High	0.431	0.703	0.49	0.839	1.281	1.401	1.227	2.045	1.444	287100	467900	326000	558400	665800	852900	932700	816900	1362000	961600	2	2	2	2	2	2
FALSE	High	[R].STEYGVGYSCDAGLHGWYR.[F]	1xTMT6plex [N-Term]; 1xCarbamidomethyl [C10]		FALSE	2.83632e-05	0	1	1	2	Q91X17	Q91X17 [187-205]	0	2407.1	High	High	High	High	High	High	High	High	High	High	0.507	0.74	0.657	0.429	1.405	0.654	1.187	1.106	1.256	70770	103300	91790	59950	139700	196200	91320	165900	154500	175500	1	1	1	1	1	1
FALSE	High	[R].MNFECSYPLDMK.[V]	2xTMT6plex [N-Term; K12]; 1xCarbamidomethyl [C5]		FALSE	0.00196903	0	1	1	5	Q91X17	Q91X17 [422-433]	0	1992.96	High	High	High	High	High	High	High	High	High	High	0.207	0.324	0.259	0.474	1.335	0.889	0.917	0.826	0.727	259200	404700	323000	592400	1250000	1668000	1111000	1145000	1032000	908200	5	5	5	5	5	5
FALSE	High	[K].LVCQDPCNTYETLTEYWR.[S]	1xTMT6plex [N-Term]; 1xDeamidated [N8]; 2xCarbamidomethyl [C3; C7]		FALSE	0.000286629	0	1	1	1	Q91X17	Q91X17 [169-186]	0	2578.18	High	High	High	High	High	High	High	High	High	High	1.208	2.567	1.38	1.698	1.46	1.636	1.144	2.537	1.446	34320	72910	39190	48220	28400	41480	46460	32500	72060	41060	1	1	1	1	1	1
FALSE	High	[K].LVCQDPCNTYETLTEYWR.[S]	1xTMT6plex [N-Term]; 2xCarbamidomethyl [C3; C7]		FALSE	7.20311e-05	0	1	1	1	Q91X17	Q91X17 [169-186]	0	2577.2	High	High	High	High	High	High	High	High	High	High
FALSE	High	[R].LECGANDIK.[M]	2xTMT6plex [N-Term; K9]; 1xCarbamidomethyl [C3]		FALSE	0.0115211	0.00117917	1	1	4	Q91X17	Q91X17 [334-342]	0	1477.81	High	High	High	High	High	High	High	High	High	High	0.103	0.186	0.122	0.588	1.332	2.178	1.328	1.713	1.001	327000	591500	390100	1874000	3189000	4247000	6945000	4236000	5461000	3192000	3	3	3	3	3	3
FALSE	High	[R].LECGANDIK.[M]	2xTMT6plex [N-Term; K9]; 1xDeamidated [N6]; 1xCarbamidomethyl [C3]		FALSE	0.0158624	0.00171593	1	1	2	Q91X17	Q91X17 [334-342]	0	1478.79	High	High	High	High	High	High	High	High	High	High	0.398	0.553	0.323	0.498	1.233	1.442	1.226	1.254	0.965	72430	100800	58850	90660	182200	224600	262700	223400	228400	175700	1	1	1	1	1	1
FALSE	High	[R].MAETCVPVLR.[C]	1xTMT6plex [N-Term]; 1xCarbamidomethyl [C5]		FALSE	0.0452778	0.00171593	1	1	1	Q91X17	Q91X17 [214-223]	0	1404.75	High	High	High	High	High	High	High	High	High	High	0.641	1.673	0.553	1.839	1.707	3.17	1.628	2.547	1.508	122700	320400	105900	352300	191500	327000	607100	311900	487800	288900	1	1	1	1	1	1
FALSE	High	[R].TACAHWSDQCCR.[W]	1xTMT6plex [N-Term]; 3xCarbamidomethyl [C3; C10; C11]		FALSE	0.0343825	0.00171593	1	1	1	Q91X17	Q91X17 [247-258]	0	1780.75	High	High	High	High	High	High	High	High	High	High	0.336	0.437	0.582	0.593	1.423	1.408	1.724	1.335	1.839	15240	19800	26410	26920	45360	64530	63880	78190	60580	83400	1	1	1	1	1	1
FALSE	High	[R].MNFECSYPLDMK.[V]	2xTMT6plex [N-Term; K12]; 1xCarbamidomethyl [C5]; 1xOxidation [M]		FALSE	0.0388186	0.00171593	1	1	4	Q91X17	Q91X17 [422-433]	0	2008.96	High	High	High	High	High	High	High	High	High	High
High	Master Protein	125080	*CON* Keratin, type i cytoskeletal 14 (cytokeratin 14) (K14) (CK 14) gi2144816pirKRHUE keratin, 50K type I cytoskeletal - human gi386848 (J00124) keratin [Homo sapiens]	TRUE	0	39.2196	21.3983	10	33	7	1	472	51.63	5.16	High	High	High	High	High	High	High	High	High	High										1.08	0.497	1.74	0.619	0.822	0.654	0.68	1.515	0.66	4289000	1972000	6906000	2456000	3969000	3264000	2595000
Checked	Confidence	Annotated Sequence	Modifications	Modifications in Master Proteins	Contaminant	Qvality PEP	Qvality q-value	# Protein Groups	# Proteins	# PSMs	Master Protein Accessions	Positions in Master Proteins	# Missed Cleavages	Theo. MH+ [Da]	Found in Sample: [S1] F1: 126, Sample	Found in Sample: [S2] F1: 127N, Sample	Found in Sample: [S3] F1: 127C, Sample	Found in Sample: [S4] F1: 128N, Sample	Found in Sample: [S5] F1: 128C, Control	Found in Sample: [S6] F1: 129N, Sample	Found in Sample: [S7] F1: 129C, Sample	Found in Sample: [S8] F1: 130N, Sample	Found in Sample: [S9] F1: 130C, Sample	Found in Sample: [S10] F1: 131, Sample	Abundance Ratio: (F1, 126) / (F1, 128C)	Abundance Ratio: (F1, 127N) / (F1, 128C)	Abundance Ratio: (F1, 127C) / (F1, 128C)	Abundance Ratio: (F1, 128N) / (F1, 128C)	Abundance Ratio: (F1, 129N) / (F1, 128C)	Abundance Ratio: (F1, 129C) / (F1, 128C)	Abundance Ratio: (F1, 130N) / (F1, 128C)	Abundance Ratio: (F1, 130C) / (F1, 128C)	Abundance Ratio: (F1, 131) / (F1, 128C)	Abundance: F1: 126, Sample	Abundance: F1: 127N, Sample	Abundance: F1: 127C, Sample	Abundance: F1: 128N, Sample	Abundance: F1: 128C, Control	Abundance: F1: 129N, Sample	Abundance: F1: 129C, Sample	Abundance: F1: 130N, Sample	Abundance: F1: 130C, Sample	Abundance: F1: 131, Sample	Abundances Count: F1: 126, Sample	Abundances Count: F1: 127N, Sample	Abundances Count: F1: 127C, Sample	Abundances Count: F1: 128N, Sample	Abundances Count: F1: 128C, Control	Abundances Count: F1: 129N, Sample
FALSE	High	[K].ASLENSLEETK.[G]	2xTMT6plex [N-Term; K11]		TRUE	0.000814261	0	1	11	4	125080	125080 [353-363]	0	1678.93	High	High	High	High	High	High	High	High	High	High	1.325	0.426	2.395	0.491	0.598	0.783	0.594	1.445	0.595	1076000	345900	1945000	398900	812000	486000	636100	482500	1173000	483500	3	3	3	3	3	3
FALSE	High	[R].ALEEANADLEVK.[I]	2xTMT6plex [N-Term; K12]		TRUE	0.000165342	0	1	15	5	125080	125080 [135-146]	0	1759.98	High	High	High	High	High	High	High	High	High	High	1.46	1.132	1.322	0.68	1.088	0.888	1.214	1.508	1.157	326800	253200	295800	152200	223800	243500	198700	271700	337400	258900	2	2	2	2	2	2
FALSE	High	[R].EVATNSELVQSGK.[S]	2xTMT6plex [N-Term; K13]		TRUE	9.18713e-05	0	1	5	1	125080	125080 [316-328]	0	1820.02	High	High	High	High	High	High	High	High	High	High	1.742	0.304	1.589	0.692	0.514	0.918	0.49	1.26	0.468	192000	33500	175200	76320	110200	56620	101200	53990	138900	51640	1	1	1	1	1	1
FALSE	High	[R].ADLEMQIESLKEELAYLK.[K]	3xTMT6plex [N-Term; K11; K18]; 1xOxidation [M5]		TRUE	0.00420714	0	1	3	1	125080	125080 [233-250]	1	2826.58	High	High	High	High	High	High	High	High	High	High	4.488	1.025	6.972	2.052	0.916	0.546	0.855	0.694	0.735	41990	9594	65230	19200	9356	8567	5109	7998	6494	6873	1	1	1	1	1	1
FALSE	High	[R].ISSVLAGGSCR.[A]	1xTMT6plex [N-Term]; 1xCarbamidomethyl [C10]		TRUE	0.015745	0.00171593	1	4	1	125080	125080 [31-41]	0	1335.73	High	High	High	High	High	High	High	High	High	High	0.917	1.718	1.212	0.912	1.062	0.942	1.109	2.351	1.41	209700	392600	277000	208600	228600	242600	215400	253600	537300	322200	1	1	1	1	1	1
FALSE	High	[K-R].VTMQNLNDR.[L]	1xTMT6plex [N-Term]; 1xDeamidated [N7]		TRUE	0.0476543	0.00171593	4	25	1	119581085; 88042; 125080; P02535	119581085 [148-156]; 88042 [19-27]; 125080 [117-125]; P02535 [146-154]	0	1320.68	High	High	High	High	High	High	High	High	High	High	0.617	0.674	0.666	0.583	0.878	0.601	0.689	0.991	0.75	223100	243800	240900	210800	361800	317800	217500	249300	358400	271200	1	1	1	1	1	1
FALSE	High	[K-R].VTMQNLNDR.[L]	1xTMT6plex [N-Term]		TRUE	0.0180635	0.00171593	4	25	5	119581085; 88042; 125080; P02535	119581085 [148-156]; 88042 [19-27]; 125080 [117-125]; P02535 [146-154]	0	1319.69	High	High	High	High	High	High	High	High	High	High	0.368	0.174	0.556	0.397	0.6	0.683	0.553	1.218	0.491	1401000	663700	2115000	1509000	3804000	2281000	2599000	2106000	4634000	1867000	2	2	2	2	2	2
FALSE	High	[R].LASYLDKVR.[A]	2xTMT6plex [N-Term; K7]		TRUE	0.0746653	0.00171593	3	26	2	119581085; 88042; 125080	119581085 [157-165]; 88042 [28-36]; 125080 [126-134]	1	1522.94	High	High	High	High	High	High	High	High	High	High	0.488	0.848	0.569	0.769	1.484	0.616	1.021	0.689	0.759	187200	325500	218300	295300	383800	569700	236600	391900	264500	291400	1	1	1	1	1	1
FALSE	High	[R].VLDELTLAR.[TA]	1xTMT6plex [N-Term]		TRUE	0.0159215	0.00171593	1	19	3	125080	125080 [224-232]	0	1258.76	High	High	High	High	High	High	High	High	High	High	1.092	0.351	1.719	0.62	0.786	0.535	0.635	1.484	0.521	2197000	706900	3458000	1248000	2012000	1581000	1075000	1277000	2986000	1047000	3	3	3	3	3	3
FALSE	High	[R].LEQEIATYR.[RSN]	1xTMT6plex [N-Term]		TRUE	0.0431743	0.00171593	1	32	2	125080	125080 [408-416]	0	1351.74	High	High	High	High	High	High	High	High	High	High	0.427	0.401	1.202	0.616	1.126	0.633	0.612	1.455	0.78	244900	230000	689700	353600	573700	645800	363300	351100	834600	447700	1	1	1	1	1	1
FALSE	High	[R].LASYLDK.[V]	2xTMT6plex [N-Term; K7]		TRUE	0.165448	0.00332358	4	30	7	119581085; 88042; 125080; 1082558	119581085 [157-163]; 88042 [28-34]; 125080 [126-132]; 1082558 [164-170]	0	1267.77	High	High	High	High	High	High	High	High	High	High	0.895	0.046	0.582	0.374	0.577	0.524	0.467	0.901	0.292	46260000	2385000	30060000	19330000	51690000	29840000	27090000	24130000	46570000	15090000	3	3	3	3	3	3
FALSE	High	[K-R].VTMQNLNDR.[L]	1xTMT6plex [N-Term]; 1xOxidation [M3]		TRUE	0.18195	0.00651022	4	25	1	119581085; 88042; 125080; P02535	119581085 [148-156]; 88042 [19-27]; 125080 [117-125]; P02535 [146-154]	0	1335.69	High	High	High	High	High	High	High	High	High	High	0.43	0.375	0.618	0.541	0.827	0.652	0.669	1.147	0.666	37120	32410	53370	46760	86370	71460	56320	57810	99080	57510	1	1	1	1	1	1
High	Master Protein	P16406	Glutamyl aminopeptidase OS=Mus musculus GN=Enpep PE=1 SV=1	FALSE	0	37.1121	11.746	11	35	11	1	945	107.888	5.44	High	High	High	High	High	High	High	High	High	High		13809	ENSMUSG00000028024	Enpep	3	cell proliferation;cellular component movement;metabolic process	membrane;organelle lumen	catalytic activity;metal ion binding	Pf01433, Pf11838, Pf13485	0.732	1.022	1.172	0.83	1.361	3.021	2.362	1.6	1.686	3178000	4438000	5090000	3607000	4344000	5913000	13120000
Checked	Confidence	Annotated Sequence	Modifications	Modifications in Master Proteins	Contaminant	Qvality PEP	Qvality q-value	# Protein Groups	# Proteins	# PSMs	Master Protein Accessions	Positions in Master Proteins	# Missed Cleavages	Theo. MH+ [Da]	Found in Sample: [S1] F1: 126, Sample	Found in Sample: [S2] F1: 127N, Sample	Found in Sample: [S3] F1: 127C, Sample	Found in Sample: [S4] F1: 128N, Sample	Found in Sample: [S5] F1: 128C, Control	Found in Sample: [S6] F1: 129N, Sample	Found in Sample: [S7] F1: 129C, Sample	Found in Sample: [S8] F1: 130N, Sample	Found in Sample: [S9] F1: 130C, Sample	Found in Sample: [S10] F1: 131, Sample	Abundance Ratio: (F1, 126) / (F1, 128C)	Abundance Ratio: (F1, 127N) / (F1, 128C)	Abundance Ratio: (F1, 127C) / (F1, 128C)	Abundance Ratio: (F1, 128N) / (F1, 128C)	Abundance Ratio: (F1, 129N) / (F1, 128C)	Abundance Ratio: (F1, 129C) / (F1, 128C)	Abundance Ratio: (F1, 130N) / (F1, 128C)	Abundance Ratio: (F1, 130C) / (F1, 128C)	Abundance Ratio: (F1, 131) / (F1, 128C)	Abundance: F1: 126, Sample	Abundance: F1: 127N, Sample	Abundance: F1: 127C, Sample	Abundance: F1: 128N, Sample	Abundance: F1: 128C, Control	Abundance: F1: 129N, Sample	Abundance: F1: 129C, Sample	Abundance: F1: 130N, Sample	Abundance: F1: 130C, Sample	Abundance: F1: 131, Sample	Abundances Count: F1: 126, Sample	Abundances Count: F1: 127N, Sample	Abundances Count: F1: 127C, Sample	Abundances Count: F1: 128N, Sample	Abundances Count: F1: 128C, Control	Abundances Count: F1: 129N, Sample
FALSE	High	[R].LPDFINPVHYDLEVK.[A]	2xTMT6plex [N-Term; K15]		FALSE	0.00149284	0	1	2	2	P16406	P16406 [85-99]	0	2257.26	High	High	High	High	High	High	High	High	High	High	1.325	1.506	4.363	3.305	0.859	2.002	0.796	1.227	1.089	115900	131700	381600	289100	87470	75120	175100	69650	107300	95260	2	2	2	2	2	2
FALSE	High	[K].SEEDFLPWER.[V]	1xTMT6plex [N-Term]		FALSE	0.00332422	0	1	1	4	P16406	P16406 [676-685]	0	1536.75	High	High	High	High	High	High	High	High	High	High	0.717	1.268	0.727	0.841	1.112	2.288	1.97	1.703	1.615	392300	693700	397600	460200	547000	608100	1252000	1078000	931500	883200	3	3	3	3	3	3
FALSE	High	[R].MLQDWITPEK.[F]	2xTMT6plex [N-Term; K10]; 1xOxidation [M1]		FALSE	0.00861597	0	1	3	2	P16406	P16406 [480-489]	0	1734.95	High	High	High	High	High	High	High	High	High	High	0.657	1.679	1.058	0.676	1.374	1.621	2.275	1.431	1.732	87370	223300	140600	89840	132900	182600	215400	302400	190200	230300	1	1	1	1	1	1
FALSE	High	[R].SSFIDDAFALAR.[A]	1xTMT6plex [N-Term]		FALSE	0.00799682	0	1	1	2	P16406	P16406 [647-658]	0	1541.82	High	High	High	High	High	High	High	High	High	High	1.066	1.671	0.657	0.589	1.581	1.34	1.739	1.264	1.805	16820	26370	10370	9302	15780	24950	21150	27450	19940	28480	2	2	2	2	2	2
FALSE	High	[K].LLYGLASVK.[D]	2xTMT6plex [N-Term; K9]		FALSE	0.0144017	0.00117917	1	1	2	P16406	P16406 [810-818]	0	1421.91	High	High	High	High	High	High	High	High	High	High	0.814	1.123	1.833	0.92	0.801	1.959	0.886	1.068	0.79	545300	752700	1228000	616200	670100	536800	1313000	593900	715400	529400	2	2	2	2	2	2
FALSE	High	[R].YISYNSYGK.[T]	2xTMT6plex [N-Term; K9]		FALSE	0.0121825	0.00117917	1	1	3	P16406	P16406 [847-855]	0	1552.84	High	High	High	High	High	High	High	High	High	High	0.64	0.712	1.144	0.683	1.862	2.343	2.935	1.465	1.895	285200	317400	509700	304100	445500	829700	1044000	1307000	652600	844100	1	1	1	1	1	1
FALSE	High	[R].ASILGFACK.[M]	2xTMT6plex [N-Term; K9]; 1xCarbamidomethyl [C8]		FALSE	0.0113087	0.00117917	1	1	5	P16406	P16406 [737-745]	0	1424.83	High	High	High	High	High	High	High	High	High	High	0.818	0.955	1.173	0.756	1.276	4.496	2.1	1.756	1.774	1045000	1220000	1499000	965100	1277000	1630000	5742000	2683000	2242000	2266000	4	4	4	4	4	4
FALSE	High	[R].MLQDWITPEK.[F]	2xTMT6plex [N-Term; K10]		FALSE	0.00938717	0.00117917	1	3	7	P16406	P16406 [480-489]	0	1718.96	High	High	High	High	High	High	High	High	High	High	0.626	0.913	0.716	0.789	1.741	3.319	4.978	1.993	2.627	315300	460400	360800	397900	504100	877300	1673000	2509000	1005000	1324000	4	4	4	4	4	4
FALSE	High	[R].YLEMLKDPNIIK.[T]	3xTMT6plex [N-Term; K6; K12]		FALSE	0.0363338	0.00171593	1	1	2	P16406	P16406 [826-837]	1	2164.3	High	High	High	High	High	High	High	High	High	High	0.712	1.127	0.968	0.51	1.486	2.387	2.667	1.565	1.443	222400	352300	302400	159300	312600	464500	746000	833500	489200	451000	1	1	1	1	1	1
FALSE	High	[R].EQVLETVK.[N]	2xTMT6plex [N-Term; K8]		FALSE	0.0459448	0.00171593	1	1	2	P16406	P16406 [917-924]	0	1403.85	High	High	High	High	High	High	High	High	High	High	0.433	0.741	0.74	0.899	1.951	2.674	2.444	1.702	1.916	151900	260100	259700	315600	351000	684700	938800	857700	597500	672400	1	1	1	1	1	1
FALSE	High	[K].NNIEWLNVNR.[Q]	1xTMT6plex [N-Term]		FALSE	0.0201149	0.00171593	1	1	2	P16406	P16406 [925-934]	0	1500.81	High	High	High	High	High	High	High	High	High	High
FALSE	High	[K].GCQIYLK.[K]	2xTMT6plex [N-Term; K7]; 1xCarbamidomethyl [C2]		FALSE	0.185676	0.00804114	1	3	2	P16406	P16406 [493-499]	0	1339.78	High	High	High	High	High	High	High	High	High	High
High	Master Protein	Q9D7Z6	Calcium-activated chloride channel regulator 1 OS=Mus musculus GN=Clca1 PE=1 SV=2	FALSE	0	36.07	13.3625	9	29	9	1	913	100.009	6.01	High	High	High	High	High	High	High	High	High	High		23844	ENSMUSG00000028255	Clca3; Clca1	3	metabolic process;response to stimulus;transport	extracellular;membrane	catalytic activity;metal ion binding;protein binding;transporter activity	Pf00092, Pf08434, Pf09315, Pf13519	0.583	1.605	0.557	1.011	1.526	0.462	0.794	1.038	1.386	2811000	7740000	2688000	4876000	4823000	7357000	2229000
Checked	Confidence	Annotated Sequence	Modifications	Modifications in Master Proteins	Contaminant	Qvality PEP	Qvality q-value	# Protein Groups	# Proteins	# PSMs	Master Protein Accessions	Positions in Master Proteins	# Missed Cleavages	Theo. MH+ [Da]	Found in Sample: [S1] F1: 126, Sample	Found in Sample: [S2] F1: 127N, Sample	Found in Sample: [S3] F1: 127C, Sample	Found in Sample: [S4] F1: 128N, Sample	Found in Sample: [S5] F1: 128C, Control	Found in Sample: [S6] F1: 129N, Sample	Found in Sample: [S7] F1: 129C, Sample	Found in Sample: [S8] F1: 130N, Sample	Found in Sample: [S9] F1: 130C, Sample	Found in Sample: [S10] F1: 131, Sample	Abundance Ratio: (F1, 126) / (F1, 128C)	Abundance Ratio: (F1, 127N) / (F1, 128C)	Abundance Ratio: (F1, 127C) / (F1, 128C)	Abundance Ratio: (F1, 128N) / (F1, 128C)	Abundance Ratio: (F1, 129N) / (F1, 128C)	Abundance Ratio: (F1, 129C) / (F1, 128C)	Abundance Ratio: (F1, 130N) / (F1, 128C)	Abundance Ratio: (F1, 130C) / (F1, 128C)	Abundance Ratio: (F1, 131) / (F1, 128C)	Abundance: F1: 126, Sample	Abundance: F1: 127N, Sample	Abundance: F1: 127C, Sample	Abundance: F1: 128N, Sample	Abundance: F1: 128C, Control	Abundance: F1: 129N, Sample	Abundance: F1: 129C, Sample	Abundance: F1: 130N, Sample	Abundance: F1: 130C, Sample	Abundance: F1: 131, Sample	Abundances Count: F1: 126, Sample	Abundances Count: F1: 127N, Sample	Abundances Count: F1: 127C, Sample	Abundances Count: F1: 128N, Sample	Abundances Count: F1: 128C, Control	Abundances Count: F1: 129N, Sample
FALSE	High	[K].VAYLQVPGTAK.[V]	2xTMT6plex [N-Term; K11]		FALSE	0.00673574	0	1	1	8	Q9D7Z6	Q9D7Z6 [551-561]	0	1604.98	High	High	High	High	High	High	High	High	High	High	0.23	0.717	0.366	0.671	1.463	0.283	0.487	0.815	1.327	336600	1050000	536300	982300	1464000	2142000	414800	713700	1194000	1944000	2	2	2	2	2	2
FALSE	High	[K].NVAILIPESWK.[A]	2xTMT6plex [N-Term; K11]		FALSE	0.00345089	0	1	1	5	Q9D7Z6	Q9D7Z6 [76-86]	0	1728.05	High	High	High	High	High	High	High	High	High	High	0.718	1.144	0.392	1.607	2.002	0.74	0.915	1.992	2.086	398300	634800	217800	891700	554900	1111000	410900	507500	1105000	1158000	2	2	2	2	2	2
FALSE	High	[K].NADVLVSTTSPLGNDEPYTEHIGACGEK.[G]	2xTMT6plex [N-Term; K28]; 1xCarbamidomethyl [C25]		FALSE	0.00403766	0	1	1	1	Q9D7Z6	Q9D7Z6 [101-128]	0	3432.7	High	High	High	High	High	High	High	High	High	High
FALSE	High	[K].NADVLVSTTSPLGNDEPYTEHIGACGEK.[G]	2xTMT6plex [N-Term; K28]; 1xDeamidated [N14]; 1xCarbamidomethyl [C25]		FALSE	0.00039694	0	1	1	1	Q9D7Z6	Q9D7Z6 [101-128]	0	3433.68	High	High	High	High	High	High	High	High	High	High	0.492	1.124	0.613	0.948	1.15	0.633	0.816	1.215	0.962	25040	57220	31220	48260	50900	58560	32200	41550	61840	48960	1	1	1	1	1	1
FALSE	High	[K].DMVTQASPYLFEATGK.[R]	2xTMT6plex [N-Term; K16]; 1xOxidation [M2]		FALSE	0.00141666	0	1	1	2	Q9D7Z6	Q9D7Z6 [55-70]	0	2232.16	High	High	High	High	High	High	High	High	High	High	0.513	1.051	0.686	1.808	1.731	0.911	1.269	1.821	1.897	58110	119100	77730	205000	113400	196200	103200	143900	206500	215100	1	1	1	1	1	1
FALSE	High	[R].IHLTPDFLAGK.[K]	2xTMT6plex [N-Term; K11]		FALSE	0.00712353	0	1	1	3	Q9D7Z6	Q9D7Z6 [132-142]	0	1670	High	High	High	High	High	High	High	High	High	High	0.466	1.054	0.392	1.199	1.64	0.538	1.415	1.195	1.809	240000	543400	202100	618100	515400	845200	277300	729500	616100	932200	3	3	3	3	3	3
FALSE	High	[K].IWALGGVTSDR.[Q]	1xTMT6plex [N-Term]		FALSE	0.0152273	0.00117917	1	1	4	Q9D7Z6	Q9D7Z6 [676-686]	0	1403.78	High	High	High	High	High	High	High	High	High	High	0.943	3.097	0.862	1.009	1.293	0.363	0.536	0.664	0.828	1436000	4719000	1313000	1537000	1524000	1970000	553100	817300	1011000	1262000	3	3	3	3	3	3
FALSE	High	[R].WGVFNEYNNDEK.[F]	2xTMT6plex [N-Term; K12]		FALSE	0.0137223	0.00117917	1	1	2	Q9D7Z6	Q9D7Z6 [163-174]	0	1972.98	High	High	High	High	High	High	High	High	High	High	0.434	0.949	0.404	0.808	2.009	0.689	1.429	1.378	2.183	122600	267700	114100	228100	282200	567100	194500	403400	388800	616100	1	1	1	1	1	1
FALSE	High	[K].DNCVFVPDPHQNEK.[A]	2xTMT6plex [N-Term; K14]; 1xCarbamidomethyl [C3]		FALSE	0.0567536	0.00171593	1	1	1	Q9D7Z6	Q9D7Z6 [222-235]	0	2157.08	High	High	High	High	High	High	High	High	High	High	0.691	0.928	0.685	0.853	1.53	0.695	1.762	1.079	1.614	56180	75410	55690	69270	81240	124300	56470	143100	87660	131200	1	1	1	1	1	1
FALSE	High	[R].CSAAITGK.[N]	2xTMT6plex [N-Term; K8]; 1xCarbamidomethyl [C1]		FALSE	0.0522019	0.00171593	1	1	2	Q9D7Z6	Q9D7Z6 [187-194]	0	1265.73	High	High	High	High	High	High	High	High	High	High	0.584	1.155	0.592	1.253	1.449	0.789	1.383	1.42	1.601	138100	273100	140000	296300	236400	342600	186400	327000	335700	378500	1	1	1	1	1	1
High	Master Protein	Q8C6C9	UPF0762 protein C6orf58 homolog OS=Mus musculus PE=2 SV=2	FALSE	0	34.059	18.3976	4	44	4	1	337	38.259	4.36	High	High	High	High	High	High	High	High	High	High		67719	ENSMUSG00000015519	2310057J18Rik	10	development	extracellular		Pf05612	0.613	0.829	0.689	2.025	2.313	0.914	2.137	2.72	1.923	2551000	3450000	2865000	8426000	4160000	9620000	3801000
Checked	Confidence	Annotated Sequence	Modifications	Modifications in Master Proteins	Contaminant	Qvality PEP	Qvality q-value	# Protein Groups	# Proteins	# PSMs	Master Protein Accessions	Positions in Master Proteins	# Missed Cleavages	Theo. MH+ [Da]	Found in Sample: [S1] F1: 126, Sample	Found in Sample: [S2] F1: 127N, Sample	Found in Sample: [S3] F1: 127C, Sample	Found in Sample: [S4] F1: 128N, Sample	Found in Sample: [S5] F1: 128C, Control	Found in Sample: [S6] F1: 129N, Sample	Found in Sample: [S7] F1: 129C, Sample	Found in Sample: [S8] F1: 130N, Sample	Found in Sample: [S9] F1: 130C, Sample	Found in Sample: [S10] F1: 131, Sample	Abundance Ratio: (F1, 126) / (F1, 128C)	Abundance Ratio: (F1, 127N) / (F1, 128C)	Abundance Ratio: (F1, 127C) / (F1, 128C)	Abundance Ratio: (F1, 128N) / (F1, 128C)	Abundance Ratio: (F1, 129N) / (F1, 128C)	Abundance Ratio: (F1, 129C) / (F1, 128C)	Abundance Ratio: (F1, 130N) / (F1, 128C)	Abundance Ratio: (F1, 130C) / (F1, 128C)	Abundance Ratio: (F1, 131) / (F1, 128C)	Abundance: F1: 126, Sample	Abundance: F1: 127N, Sample	Abundance: F1: 127C, Sample	Abundance: F1: 128N, Sample	Abundance: F1: 128C, Control	Abundance: F1: 129N, Sample	Abundance: F1: 129C, Sample	Abundance: F1: 130N, Sample	Abundance: F1: 130C, Sample	Abundance: F1: 131, Sample	Abundances Count: F1: 126, Sample	Abundances Count: F1: 127N, Sample	Abundances Count: F1: 127C, Sample	Abundances Count: F1: 128N, Sample	Abundances Count: F1: 128C, Control	Abundances Count: F1: 129N, Sample
FALSE	High	[R].NSGSLSLTLWENLMSTK.[L]	2xTMT6plex [N-Term; K17]		FALSE	4.61401e-05	0	1	2	5	Q8C6C9	Q8C6C9 [303-319]	0	2339.27	High	High	High	High	High	High	High	High	High	High	2.676	4.838	1.198	3.587	1.399	1.868	1.135	4.01	1.221	253200	457800	113400	339400	94640	132400	176800	107400	379500	115500	4	4	4	4	4	4
FALSE	High	[R].ILLEETAMYFAK.[Y]	2xTMT6plex [N-Term; K12]; 1xOxidation [M8]		FALSE	0.00346382	0	1	2	11	Q8C6C9	Q8C6C9 [66-77]	0	1903.07	High	High	High	High	High	High	High	High	High	High	1.077	1.469	1.673	9.087	1.875	3.502	1.379	4.797	3.597	198500	270800	308200	1675000	184300	345500	645400	254100	884000	662800	8	8	8	8	8	8
FALSE	High	[R].ILLEETAMYFAK.[Y]	2xTMT6plex [N-Term; K12]		FALSE	0.000158673	0	1	2	9	Q8C6C9	Q8C6C9 [66-77]	0	1887.07	High	High	High	High	High	High	High	High	High	High	1.669	1.678	3.34	24.216	4.127	7.021	3.463	8.672	3.759	47070	47320	94220	683100	28210	116400	198000	97690	244600	106000	3	3	3	3	2	3
FALSE	High	[R].VLVDTDIAPFIPDFTPLQNEVLVSLK.[L]	2xTMT6plex [N-Term; K26]		FALSE	3.33377e-06	0	1	2	12	Q8C6C9	Q8C6C9 [270-295]	0	3341.9	High	High	High	High	High	High	High	High	High	High	6.787	9.627	3.758	12.456	1.646	0.769	0.311	1.328	1.906	642900	911900	356000	1180000	94730	155900	72820	29480	125800	180500	5	5	5	5	5	5
FALSE	High	[R].YNFYSEK.[E]	2xTMT6plex [N-Term; K7]		FALSE	0.174701	0.00492494	1	2	7	Q8C6C9	Q8C6C9 [226-232]	0	1408.75	High	High	High	High	High	High	High	High	High	High	0.375	0.469	0.53	1.21	2.36	0.721	2.236	2.576	1.845	1410000	1762000	1993000	4549000	3758000	8870000	2708000	8402000	9681000	6934000	5	5	5	5	5	5
High	Master Protein	J3QPG5	Sulfated glycoprotein 1 OS=Mus musculus GN=Psap PE=2 SV=1	FALSE	0	33.7599	12.2083	7	31	7	1	557	61.322	5.29	High	High	High	High	High	High	High	High	High	High			ENSMUSG00000004207		10	cell differentiation;metabolic process;regulation of biological process;response to stimulus	mitochondrion;vacuole		Pf02199, Pf03489, Pf05184	0.259	0.38	0.278	0.596	0.825	1.314	1.58	2.378	1.467	998100	1467000	1072000	2298000	3858000	3182000	5070000
Checked	Confidence	Annotated Sequence	Modifications	Modifications in Master Proteins	Contaminant	Qvality PEP	Qvality q-value	# Protein Groups	# Proteins	# PSMs	Master Protein Accessions	Positions in Master Proteins	# Missed Cleavages	Theo. MH+ [Da]	Found in Sample: [S1] F1: 126, Sample	Found in Sample: [S2] F1: 127N, Sample	Found in Sample: [S3] F1: 127C, Sample	Found in Sample: [S4] F1: 128N, Sample	Found in Sample: [S5] F1: 128C, Control	Found in Sample: [S6] F1: 129N, Sample	Found in Sample: [S7] F1: 129C, Sample	Found in Sample: [S8] F1: 130N, Sample	Found in Sample: [S9] F1: 130C, Sample	Found in Sample: [S10] F1: 131, Sample	Abundance Ratio: (F1, 126) / (F1, 128C)	Abundance Ratio: (F1, 127N) / (F1, 128C)	Abundance Ratio: (F1, 127C) / (F1, 128C)	Abundance Ratio: (F1, 128N) / (F1, 128C)	Abundance Ratio: (F1, 129N) / (F1, 128C)	Abundance Ratio: (F1, 129C) / (F1, 128C)	Abundance Ratio: (F1, 130N) / (F1, 128C)	Abundance Ratio: (F1, 130C) / (F1, 128C)	Abundance Ratio: (F1, 131) / (F1, 128C)	Abundance: F1: 126, Sample	Abundance: F1: 127N, Sample	Abundance: F1: 127C, Sample	Abundance: F1: 128N, Sample	Abundance: F1: 128C, Control	Abundance: F1: 129N, Sample	Abundance: F1: 129C, Sample	Abundance: F1: 130N, Sample	Abundance: F1: 130C, Sample	Abundance: F1: 131, Sample	Abundances Count: F1: 126, Sample	Abundances Count: F1: 127N, Sample	Abundances Count: F1: 127C, Sample	Abundances Count: F1: 128N, Sample	Abundances Count: F1: 128C, Control	Abundances Count: F1: 129N, Sample
FALSE	High	[K].LVLYLEHNLEK.[N]	2xTMT6plex [N-Term; K11]		FALSE	0.000502477	0	1	5	9	J3QPG5	J3QPG5 [448-458]	0	1829.09	High	High	High	High	High	High	High	High	High	High	0.135	0.155	0.144	0.459	0.738	1.365	1.901	2.582	1.396	129900	149300	137800	441100	960400	709100	1311000	1825000	2480000	1341000	4	4	4	5	5	5
FALSE	High	[K].GCSFLPDPYQK.[Q]	2xTMT6plex [N-Term; K11]; 1xCarbamidomethyl [C2]		FALSE	0.00234755	0	1	5	9	J3QPG5	J3QPG5 [472-482]	0	1769.93	High	High	High	High	High	High	High	High	High	High	0.181	0.34	0.212	0.278	0.632	0.802	1.531	1.32	0.963	323400	609900	380600	498600	1791000	1132000	1437000	2743000	2365000	1725000	5	5	5	5	5	5
FALSE	High	[K].LVSDVQTAVK.[T]	2xTMT6plex [N-Term; K10]		FALSE	0.00329945	0	1	5	4	J3QPG5	J3QPG5 [203-212]	0	1517.93	High	High	High	High	High	High	High	High	High	High	0.396	0.582	0.314	1.407	1.348	1.355	1.139	3.377	2.94	112600	165600	89450	400500	284600	383800	385500	324100	961100	836900	1	1	1	1	1	1
FALSE	High	[K].KLVLYLEHNLEK.[N]	3xTMT6plex [N-Term; K1; K12]		FALSE	0.000845307	0	1	5	3	J3QPG5	J3QPG5 [447-458]	1	2186.35	High	High	High	High	High	High	High	High	High	High	0.102	0.185	0.192	0.905	0.709	1.223	0.904	2.669	0.811	32120	58160	60220	284400	314200	222800	384300	284100	838600	254900	2	2	2	2	2	2
FALSE	High	[K].TVVTEAGNLLK.[D]	2xTMT6plex [N-Term; K11]		FALSE	0.00453368	0	1	5	3	J3QPG5	J3QPG5 [68-78]	0	1602.98	High	High	High	High	High	High	High	High	High	High	1.244	1.17	1.364	1.402	1.412	3.447	1.652	6.723	3.773	278300	261700	305200	313600	223700	315800	771200	369500	1504000	844000	1	1	1	1	1	1
FALSE	High	[K].EVVDSYLPVILDMIK.[G]	2xTMT6plex [N-Term; K15]		FALSE	0.00264608	0	1	5	2	J3QPG5	J3QPG5 [108-122]	0	2192.27	High	High	High	High	High	High	High	High	High	High	1.209	2.093	0.844	2.754	1.058	3.685	0.952	2.056	1.375	27710	47970	19340	63120	22920	24240	84460	21830	47110	31510	2	2	2	2	2	2
FALSE	High	[K].NGGFCEVCK.[K]	2xTMT6plex [N-Term; K9]; 1xDeamidated [N1]; 2xCarbamidomethyl [C5; C8]		FALSE	0.11794	0.00171593	1	5	1	J3QPG5	J3QPG5 [438-446]	0	1529.75	High	High	High	High	High	High	High	High	High	High	0.361	0.667	0.302	1.139	1.511	2.671	2.02	3.753	2.408	94120	174000	78830	296900	260800	394100	696600	526900	978900	628100	1	1	1	1	1	1
High	Master Protein	P01837	Ig kappa chain C region OS=Mus musculus PE=1 SV=1	FALSE	0	33.7252	23.5849	2	27	2	1	106	11.771	5.41	High	High	High	High	High	High	High	High	High	High		16071		Igkc	6	cell differentiation;cell organization and biogenesis;defense response;metabolic process;regulation of biological process;response to stimulus	membrane	metal ion binding;protein binding	Pf07654	0.831	1.178	1.41	2.95	1.588	1.541	1.043	2.532	1.274	1248000	1769000	2116000	4429000	1501000	2384000	2313000
Checked	Confidence	Annotated Sequence	Modifications	Modifications in Master Proteins	Contaminant	Qvality PEP	Qvality q-value	# Protein Groups	# Proteins	# PSMs	Master Protein Accessions	Positions in Master Proteins	# Missed Cleavages	Theo. MH+ [Da]	Found in Sample: [S1] F1: 126, Sample	Found in Sample: [S2] F1: 127N, Sample	Found in Sample: [S3] F1: 127C, Sample	Found in Sample: [S4] F1: 128N, Sample	Found in Sample: [S5] F1: 128C, Control	Found in Sample: [S6] F1: 129N, Sample	Found in Sample: [S7] F1: 129C, Sample	Found in Sample: [S8] F1: 130N, Sample	Found in Sample: [S9] F1: 130C, Sample	Found in Sample: [S10] F1: 131, Sample	Abundance Ratio: (F1, 126) / (F1, 128C)	Abundance Ratio: (F1, 127N) / (F1, 128C)	Abundance Ratio: (F1, 127C) / (F1, 128C)	Abundance Ratio: (F1, 128N) / (F1, 128C)	Abundance Ratio: (F1, 129N) / (F1, 128C)	Abundance Ratio: (F1, 129C) / (F1, 128C)	Abundance Ratio: (F1, 130N) / (F1, 128C)	Abundance Ratio: (F1, 130C) / (F1, 128C)	Abundance Ratio: (F1, 131) / (F1, 128C)	Abundance: F1: 126, Sample	Abundance: F1: 127N, Sample	Abundance: F1: 127C, Sample	Abundance: F1: 128N, Sample	Abundance: F1: 128C, Control	Abundance: F1: 129N, Sample	Abundance: F1: 129C, Sample	Abundance: F1: 130N, Sample	Abundance: F1: 130C, Sample	Abundance: F1: 131, Sample	Abundances Count: F1: 126, Sample	Abundances Count: F1: 127N, Sample	Abundances Count: F1: 127C, Sample	Abundances Count: F1: 128N, Sample	Abundances Count: F1: 128C, Control	Abundances Count: F1: 129N, Sample
FALSE	High	[R].QNGVLNSWTDQDSK.[D]	2xTMT6plex [N-Term; K14]		FALSE	0.000145585	0	1	1	3	P01837	P01837 [48-61]	0	2050.06	High	High	High	High	High	High	High	High	High	High	0.779	0.834	0.71	0.919	1.928	0.836	1.232	2.105	1.413	194400	208200	177300	229400	249600	481100	208600	307500	525400	352800	2	2	2	2	2	2
FALSE	High	[R].QNGVLNSWTDQDSK.[D]	2xTMT6plex [N-Term; K14]; 1xDeamidated [N/Q]		FALSE	1.10024e-05	0	1	1	12	P01837	P01837 [48-61]	0	2051.04	High	High	High	High	High	High	High	High	High	High	0.48	0.726	0.475	1.032	1.827	0.961	1.222	2.514	1.615	153200	231900	151500	329400	319200	583400	306900	390100	802600	515500	3	3	3	3	3	3
[truncated: 600 more rows]
[truncated: 16 more columns]
